# Supplementary material for: Interaction mapping of endoplasmic reticulum ubiquitin ligases identifies modulators of innate immune signalling
Source: eLife. 2020 Jul 2;9:e57306. doi: 10.7554/eLife.57306 (PMC7332293; doi:10.7554/eLife.57306)
Supplement: Figure 3—source data 1. [file elife-57306-fig3-data1.xlsx]

## Sheet: Sheet1
SOURCE DATA - Figure 3B
Fold change in ER-E3 transcript level with ER stress induction (Normalised Nanostring)
		UNTREATED			Tunicamycin			SubAB
	replicate 1	replicate 2	replicate 3	replicate 1	replicate 2	replicate 3	replicate 1	replicate 2	replicate 3
gp78/AMFR	1	1	1	1.29	1.191	2.054	0.813	0.778	1.038
BFAR	1	1	1	1.353	1.249	1.926	1.014	1.096	1.398
CGRRF1	1	1	1	1.895	2.18	2.954	1.331	1.674	2.098
Hrd1	1	1	1	4.983	5.153	7.639	3.454	2.923	3.685
MARCH2	1	1	1	0.886	1.202	1.653	0.624	0.801	1.301
MARCH6	1	1	1	1.347	1.352	1.672	1.051	1.005	1.377
MARCH8	1	1	1	1.379	1.379	1.956	0.521	0.671	0.979
RNF5	1	1	1	1.612	1.32	3.51	1.362	1.061	1.584
RNF13	1	1	1	2.109	2.135	3.234	1.243	1.295	2.096
RNF26	1	1	1	1.301	1.312	1.95	0.58	0.556	0.809
RNF103	1	1	1	1.099	1.282	1.434	0.553	1.153	0.605
RNF128	1	1	1	1.485	1.421	2.991	0.947	0.866	1.296
RNF139	1	1	1	1.739	1.638	1.921	2.026	1.271	1.814
RNF145	1	1	1	1.391	1.441	2.158	0.789	0.845	1.226
RNF150	1	1	1	1.124	1.416	1.514	1.418	1.234	1.622
RNF170	1	1	1	2.537	1.359	3.3	1.233	1.569	1.938
RNF185	1	1	1	1.339	1.631	1.873	1.183	1.124	1.292
RNFT1	1	1	1	2.138	1.376	2.933	1.733	1.652	2.153
TRIM13	1	1	1	0.938	0.926	1.401	0.924	0.973	1.369
TRIM59	1	1	1	1.43	1.772	2.271	1.18	1.114	1.553
