# Supplementary material for: Interaction mapping of endoplasmic reticulum ubiquitin ligases identifies modulators of innate immune signalling
Source: eLife. 2020 Jul 2;9:e57306. doi: 10.7554/eLife.57306 (PMC7332293; doi:10.7554/eLife.57306)
Supplement: Figure 4—figure supplement 1—source data 1. [file elife-57306-fig2.xlsx]

## Sheet: Sheet1
SOURCE DATA - Figure 4 - figure supplement 1B
ER-E3 to CNX ratio (Nanostring)
	replicate 1	replicate 2	replicate 3
gp78/AMFR	0.0728	0.0672	0.0796
BFAR	0.0829	0.0741	0.0842
CGRRF1	0.0129	0.0135	0.0172
Hrd1	0.0176	0.0176	0.0195
MARCH2	0.0122	0.0145	0.013
MARCH6	0.0619	0.069	0.0795
MARCH8	0.0102	0.0096	0.0099
RNF5	0.0118	0.0097	0.0071
RNF13	0.0336	0.0341	0.038
RNF26	0.0533	0.0489	0.0616
RNF103	0.0048	0.0053	0.0055
RNF128	0.0122	0.0106	0.0062
RNF139	0.0081	0.0087	0.0104
RNF145	0.0669	0.0657	0.0705
RNF150	0.0096	0.011	0.0113
RNF170	0.0059	0.0042	0.0058
RNF185	0.0241	0.0274	0.0301
RNFT1	0.0092	0.0065	0.0088
TRIM13	0.0249	0.0223	0.027
TRIM59	0.0107	0.012	0.0113
