# Supplementary material for: Interaction mapping of endoplasmic reticulum ubiquitin ligases identifies modulators of innate immune signalling
Source: eLife. 2020 Jul 2;9:e57306. doi: 10.7554/eLife.57306 (PMC7332293; doi:10.7554/eLife.57306)
Supplement: Figure 6—figure supplement 1—source data 1. [file elife-57306-fig6-figsupp1-data1.xlsx]

## Sheet: Supp. Figure 1A
SOURCE DATA - Figure 6 - figure supplement 1A
IFIT1 fold-change relative to UNTR (untreated)
	Replicate 1	Replicate 2	Replicate 3
UNTR	1	1	1
Lipofectamine2000	0.906192	1.11533	1.32397
5μg/ml cGAMP	5.77934	6.10021	8.04129
10μg/ml cGAMP	17.3963	16.0384	18.1775

## Sheet: Supp. Figure 1B
SOURCE DATA - Figure 6 - figure supplement 1B
RNF26 levels
	Replicate 1	Replicate 2	Replicate 3
siNTC	1	1	1
siRNF26 #1	0.403321	0.401461	0.408951
siRNF26 #2	0.169576	0.178418	0.191224

## Sheet: Supp. Figure 1C
SOURCE DATA - Figure 6 - figure supplement 1C
IFIT1 fold-change relative to UNTR (untreated) counterpart
	Replicate 1	Replicate 2	Replicate 3	Replicate 4
FH-RNF26WT UNTR	1	1	1	1
FH-RNF26WT cGAMP	3.36	4.81	4.62	5.16
FH-RNF26Y432A UNTR	1	1	1	1
FH-RNF26Y432A cGAMP	2.08	2.33	3.18	3.88

## Sheet: Supp. Figure 1D
SOURCE DATA - Figure 6 - figure supplement 1D
IFIT1 fold-change relative to UNTR (untreated) counterpart
	Replicate 1	Replicate 2	Replicate 3	Replicate 4	Replicate 5	Replicate 6
siNTC UNTR	1	1	1	1	1	1
siNTC cGAMP	3.05	3.97	2.77	1.99	2.94	3.86
siRNF26 #1 UNTR	1	1	1	1	1	1
siRNF26 #1 cGAMP	2.36	2.03	2.11	1.8	2.25	2.48
	Replicate 1	Replicate 2	Replicate 3	Replicate 4
siNTC UNTR	1	1	1	1
siNTC cGAMP	2.77	3.61	3.84	4.06
siEndod1 #2 UNTR	1	1	1	1
siEndod1 #2 cGAMP	1.62	1.93	1.75	2.83
siTMED1 #1 UNTR	1	1	1	1
siTMED1 #1 cGAMP	2.06	2.71	2.36	2.91
	Replicate 1	Replicate 2	Replicate 3	Replicate 4
siNTC UNTR	1	1	1	1
siNTC cGAMP	1.99	2.94	3.86	2.6
siTMEM43 #4 UNTR	1	1	1	1
siTMEM43 #4 cGAMP	4.07	4.49	5.59	5.38
	Replicate 1	Replicate 2	Replicate 3	Replicate 4	Replicate 5	Replicate 6	Replicate 7	Replicate 8
siNTC UNTR	1	1	1	1	1	1	1	1
siNTC cGAMP	2.77	3.61	3.84	4.06	3.51	3.73	2.39	1.83
siTMEM33 #1 UNTR	1	1	1	1	1	1	1	1
siTMEM33 #1 cGAMP	6.52	3.83	3.61	6.55	4.66	5.31	3.27	3.08
