# Supplementary material for: Interaction mapping of endoplasmic reticulum ubiquitin ligases identifies modulators of innate immune signalling
Source: eLife. 2020 Jul 2;9:e57306. doi: 10.7554/eLife.57306 (PMC7332293; doi:10.7554/eLife.57306)
Supplement: Figure 6—source data 1. [file elife-57306-fig6-data1.xlsx]

## Sheet: Figure 6C
SOURCE DATA - Figure 6C
% STING levels relative to siNTC UNTR (untreated)
	Replicate 1	Replicate 2	Replicate 3
siNTC UNTR	100	100	100
siNTC cGAMP	54.4481	53.9749	49.0104
siTMEM33 UNTR	96.5362	98.5126	95.5553
siTMEM33 cGAMP	46.4783	49.2623	43.0532
siTMEM43 UNTR	114.733	105.296	112.283
siTMEM43 cGAMP	63.9796	62.2634	56.1008
siENDOD1 UNTR	123.341	119.943	108.283
siENDOD1 cGAMP	80.7941	69.9463	60.7047
siTMED1 UNTR	76.513	74.285	71.21
siTMED1 cGAMP	37.2867	33.3443	23.9294
siRNF26 UNTR	84.0674	78.5863	85.6343
siRNF26 cGAMP	38.7628	35.9973	37.1132

## Sheet: Figure 6D
SOURCE DATA - Figure 6D
IFIT1 fold-change relative to UNTR (untreated) counterparts
	Replicate 1	Replicate 2	Replicate 3	Replicate 4	Replicate 5	Replicate 6
siNTC UNTR	1	1	1	1	1	1
siNTC cGAMP	3.05	3.97	2.77	1.99	2.94	3.86
siRNF26 #2 UNTR	1	1	1	1	1	1
siRNF26 #2 cGAMP	1.52	1.61	1.77	1.37	1.75	2.28
	Replicate 1	Replicate 2	Replicate 3	Replicate 4
siNTC UNTR	1	1	1	1
siNTC cGAMP	2.77	3.61	3.84	4.06
siEndod1 #1 UNTR	1	1	1	1
siEndod1 #1 cGAMP	1.27	2.4	1.6	2.41
siTMED1 #2 UNTR	1	1	1	1
siTMED1 #2 cGAMP	1.88	2.16	1.94	3.11
	Replicate 1	Replicate 2	Replicate 3	Replicate 4	Replicate 5	Replicate 6	Replicate 7	Replicate 8
siNTC UNTR	1	1	1	1	1	1	1	1
siNTC cGAMP	2.77	3.61	3.84	4.06	1.99	2.94	3.86	2.6
siTMEM43 #2 UNTR	1	1	1	1	1	1	1	1
siTMEM43 #2 cGAMP	6.84	8.41	7.07	11.48	5.03	3.85	4.2	4.59
	Replicate 1	Replicate 2	Replicate 3	Replicate 4	Replicate 5	Replicate 6
siNTC UNTR	1	1	1	1	1	1
siNTC cGAMP	2.77	3.61	3.84	4.06	3.51	3.73
siTMEM33 #2 UNTR	1	1	1	1	1	1
siTMEM33 #2 cGAMP	4.52	4.53	4.47	7.29	5.92	5.16

## Sheet: FIgure 6E
SOURCE DATA - Figure 6E
IFIT1 fold-change relative to UNTR (untreated) counterparts
	Replicate 1	Replicate 2	Replicate 3	Replicate 4
siNTC UNTR	1	1	1	1
siNTC cGAMP	4.75	3.64	3.84	4.43
siRNF26 UNTR	1	1	1	1
siRNF26 cGAMP	1.9	1.74	1.71	1.97
siRNF26/ENDOD1 UNTR	1	1	1	1
siRNF26/ENDOD1 cGAMP	1.98	1.65	1.43	1.62
siRNF26/TMED1 UNTR	1	1	1	1
siRNF26/TMED1 cGAMP	2.01	1.89	1.93	1.68
siRNF26/TMEM43 UNTR	1	1	1	1
siRNF26/TMEM43 cGAMP	2.92	2.42	2.86	2.57
siRNF26/TMEM33 UNTR	1	1	1	1
siRNF26/TMEM33 cGAMP	3.11	3.05	2.89	2.63
