# Supplementary material for: Interaction mapping of endoplasmic reticulum ubiquitin ligases identifies modulators of innate immune signalling
Source: eLife. 2020 Jul 2;9:e57306. doi: 10.7554/eLife.57306 (PMC7332293; doi:10.7554/eLife.57306)
Supplement: Supplementary file 1. — Supplemental Table 1- ER-resident E3 features and positioning of FLAG-HA epitopes. Supplemental Table 2- Unique protein signatures of ER-resident E3 pulldowns identified by LC-MS/MS and BSCG analysis. Supplemental Table 3- Common contaminants removed from BSCG and SINQ analyses. Supplemental Table 4- Unique ER-resident E3 interactors identified by SINQ analysis of LC-MS/MS dataset. Supplemental Table 5- High-confidence candidate interacting proteins (HCIPs) of ER-resident E3s. Supplemental Table 6- NanoString quantitative transcriptomic codeset of ER-resident E3s. Supplemental Table 7- Targets of UPR transcription factors among ER-resident E3 HCIPs. Supplemental Table 8- BSCG analysis of RNF26Y432A compared to RNF26WT. Supplemental Table 9- ORF sources for ER-resident E3. Supplemental Table 10- ORF sources for HCIPs Supplemental Table 11- siRNA sequences Supplemental Table 12. Statistical analyses. [file elife-57306-supp1.xlsx]

## Sheet: Table S1 (E3 features)
	TABLE S1
	ER-resident E3 features and FLAG-HA tag position
	E3	predicted TMDs	Other domains	RING type	FLAG-HA position
	gp78/AMFR	8	CUE; G2BR; VIM	C3H2C3	C
	BFAR	4		C3HC4	N
	CGRRF1	1		C3HC4	C
	Hrd1	6	VBM	C3H2C3	C
	MARCH2	2		C4HC3	C
	MARCH3	2		C4HC3	C
	MARCH4	2	SP	C4HC3	C
	MARCH6	14		C4HC3	N
	MARCH8	2		C4HC3	C
	RNF5	2		C3HC4	N
	RNF13	1	SP; PA domain	C3H2C3	C
	RNF26	6		C3HC4	N
	RNF103	4		C3H2C3	C
	RNF128	1	SP; PA domain	C3H2C3	C
	RNF139	14		C3H2C3	C
	RNF145	14		C3H2C3	C
	RNF148	1	SP; PA domain	C3H2C3	C
	RNF150	1	SP; PA domain	C3H2C3	N
	RNF170	3		C3HC4	C
	RNF185	2		C3HC4	C
	RNFT1	6		C3HC4	N
	TMEM129	3		C8	C
	TRIM13	1	B-box	C3HC4	C
	TRIM59	1	B-box	C3HC4	C
	ZNRF4	1	SP; PA domain	C3H2C3	C

## Sheet: Table S2 (BSCG data)
	TABLE S2
	Unique protein signatures of ER-resident E3 interactors identified by LC-MS/MS and BSCG analysis
	RAW ABUNDANCE (average)																							FOLD CHANGE																							P-VALUE
ID	AMFR	BFAR	CGRRF1	Hrd1	MARCH2	MARCH3	MARCH4	MARCH6	MARCH8	RNF5	RNF103	RNF128	RNF139	RNF148	RNF170	RNF185	RNFT1	TMEM129	TRIM13	ZNRF4	RNF26 (WT)	RNF26 (Y432A)		AMFR	BFAR	CGRRF1	Hrd1	MARCH2	MARCH3	MARCH4	MARCH6	MARCH8	RNF5	RNF103	RNF128	RNF139	RNF148	RNF170	RNF185	RNFT1	TMEM129	TRIM13	ZNRF4	RNF26 (WT)	RNF26 (Y432A)		AMFR	BFAR	CGRRF1
A0A075B759	NA	NA	NA	NA	NA	NA	NA	NA	NA	NA	NA	NA	NA	NA	NA	NA	NA	NA	NA	NA	217868	219366		NA	NA	NA	NA	NA	NA	NA	NA	NA	NA	NA	NA	NA	NA	NA	NA	NA	NA	NA	NA	0.773212	0.258271		NA	NA	NA
A0AVI4	762240	3.54104e+06	1.08369e+06	1.16399e+06	1.10878e+06	954372	1.21859e+06	1.52248e+06	547368	2.64214e+06	1.11901e+06	498687	810986	1.38668e+06	662524	938832	1.15301e+06	1.91127e+08	1.23615e+06	1.00925e+06	475207	695305		-0.593673	0.834172	-0.652841	-0.551787	-0.816691	-0.732847	-0.840953	-0.191032	-1.30032	0.551621	-0.989527	-1.31919	-0.113487	0.711132	-0.154797	-1.20282	-0.853456	7.44597	0.546793	-0.235351	-1.49029	-1.18437		0.499688	0.493979	0.499842
A0FGR8	145671	27223.3	87997.6	57754.6	117883	64057.5	87879	32575.3	91021.5	111600	34880.9	29587.6	94963.6	4798.16	14763.3	67633.4	55093.4	48682.6	17884	84238	165120	242923		1.69268	-1.40379	0.266397	-0.246793	0.329423	0.113997	0.0109033	-0.954191	0.409006	0.538169	-1.22422	-0.805337	1.61413	-2.00343	-0.457736	-0.317441	-0.611473	0.328079	-0.57785	1.05998	1.20997	1.24975		0.401946	0.304682	0.499842
A1L0T0	127958	34488.1	44288.5	27558.4	38750.8	39080.7	102320	26812.8	56287.3	116490	38733.3	23827.8	92114.2	23723.9	16956.1	74735.4	52968.8	26843.5	23220.7	84527.7	13618	267185		1.71816	-0.863737	-0.645297	-1.18215	-1.25129	-0.440216	0.353805	-1.03512	-0.207755	0.733409	-0.914215	-0.988936	1.78726	0.696716	0.105553	-0.0483119	-0.563235	-0.337591	0.119853	1.23533	-0.191291	3.63401		0.398223	0.485546	0.499842
A2A3N6	28633.4	62760.9	25407.5	59061.3	21046.9	272133	46938.6	54083.5	29546.7	58924.1	49376.8	56197.3	35461.5	47788.9	52284.2	55687.8	50965.1	47377.6	21020.7	24932.1	NA	NA		-0.449421	0.124613	-1.32745	0.0645567	-1.9951	2.58436	-0.655405	0.0887327	-1.00877	-0.137152	-0.433076	0.43169	0.440056	1.75214	1.75589	-0.335666	-0.459817	0.586143	-0.0379759	-0.474594	NA	NA		0.499688	0.499255	0.188811
A2VDJ0	0	0	0	0	0	0	0	0	0	0	0	402.54	0	0	0	0	0	0	0	18022.7	NA	NA		NA	NA	NA	NA	NA	NA	NA	NA	NA	NA	NA	-5.7297	NA	NA	NA	NA	NA	NA	NA	5.7297	NA	NA		NA	NA	NA
A5A3E0	NA	NA	NA	NA	NA	NA	NA	NA	NA	NA	NA	NA	NA	NA	NA	NA	NA	NA	NA	NA	0	0		NA	NA	NA	NA	NA	NA	NA	NA	NA	NA	NA	NA	NA	NA	NA	NA	NA	NA	NA	NA	NA	NA		NA	NA	NA
A5YKK6	NA	NA	NA	NA	NA	NA	NA	NA	NA	NA	NA	NA	NA	NA	NA	NA	NA	NA	NA	NA	34074.8	62865.9		NA	NA	NA	NA	NA	NA	NA	NA	NA	NA	NA	NA	NA	NA	NA	NA	NA	NA	NA	NA	0.385497	0.7308		NA	NA	NA
A6NCE7	12069.7	61485.2	40770.2	27534.4	44696.7	53505.8	58191.6	63894.5	53715.2	84723.4	89556.6	25424.7	11056.2	10175.9	9702.64	89880.4	78848.2	26903.5	20992.1	17945.4	NA	NA		-1.34684	0.482121	-0.265374	-0.707854	-0.525453	0.520858	0.0242818	0.739154	0.241033	0.773363	0.836851	-0.398494	-0.913067	-0.109106	-0.307216	0.742054	0.545906	0.143156	0.406535	-0.585486	NA	NA		0.415999	0.499255	0.499842
A6NFN3	27207.1	45194.5	42753.7	30617.9	53779.3	32459.8	23228	24383.9	20989.9	33424.8	30930.3	24606.7	9972.62	13557.5	9759.87	30664.9	39928.4	18814.3	15185.3	23223.9	NA	NA		0.512265	0.646821	0.391341	0.0540393	0.30055	0.376828	-0.784727	-0.0639483	-0.621172	-0.0445307	-0.15672	0.137163	-0.42683	0.991079	0.433751	-0.297656	0.0951807	0.23354	0.641399	0.394877	NA	NA		0.499688	0.499255	0.499842
A6NHG4	25507.5	60509.1	59502.1	53673.1	84949.4	26187.1	70000.9	69039.2	26478.9	17772.9	48047.3	84796.8	9496.4	7428.46	7641.5	25009.9	41674.3	9728.4	8046.66	2089.68	NA	NA		0.352403	1.02337	0.828687	0.841172	0.934058	-0.00805398	0.819691	1.43878	-0.327583	-1.05705	0.44462	1.94332	-0.564657	0.0195483	-0.00822195	-0.664433	0.0996621	-0.823867	-0.390263	-3.29591	NA	NA		0.499688	0.43458	0.404015
A6NHR9	112405	192349	153934	107512	162612	192760	190167	176911	166822	149944	147733	153258	143061	114603	130727	121309	124109	122767	160865	104278	125939	140692		-0.194457	0.0616265	-0.210979	-0.68597	-0.418305	0.309335	-0.214708	0.0771397	-0.0021153	-0.421745	-0.481034	0.243704	0.726205	0.867546	1.07529	-0.831706	-0.793545	0.107148	1.09054	-0.170772	-0.500416	-0.70053		0.499688	0.499255	0.499842
A7E2Y1	0	0	185.744	0	0	9383.25	123174	103518	0	248401	1.18288e+06	12.7631	303475	1.21397e+06	21832.1	1.52183e+06	1.11788e+06	1.29374e+06	268513	1.44931e+06	2.20048e+06	1.64128e+06		NA	NA	-9.44209	NA	NA	-3.41191	-0.0651559	1.10275	NA	1.12907	3.40887	-11.956	2.64328	5.07941	0.162242	3.73427	3.27481	4.36178	2.60707	4.53536	0.620158	-0.153001		NA	NA	6.12e-38
A8MVX0	NA	NA	NA	NA	NA	NA	NA	NA	NA	NA	NA	NA	NA	NA	NA	NA	NA	NA	NA	NA	0	0		NA	NA	NA	NA	NA	NA	NA	NA	NA	NA	NA	NA	NA	NA	NA	NA	NA	NA	NA	NA	NA	NA		NA	NA	NA
A8MWD9	NA	NA	NA	NA	NA	NA	NA	NA	NA	NA	NA	NA	NA	NA	NA	NA	NA	NA	NA	NA	145159	74110.2		NA	NA	NA	NA	NA	NA	NA	NA	NA	NA	NA	NA	NA	NA	NA	NA	NA	NA	NA	NA	2.64764	0.933006		NA	NA	NA
B0I1T2	NA	NA	NA	NA	NA	NA	NA	NA	NA	NA	NA	NA	NA	NA	NA	NA	NA	NA	NA	NA	0	831.18		NA	NA	NA	NA	NA	NA	NA	NA	NA	NA	NA	NA	NA	NA	NA	NA	NA	NA	NA	NA	NA	-2.15028		NA	NA	NA
B5ME19	311000	588148	598289	440459	724188	508077	730100	595785	367737	495614	832651	471896	417382	309386	351367	809011	906871	469764	343776	471590	NA	NA		-0.46635	-0.266042	0.000189679	-0.459301	0.0683812	-0.122074	-0.0705305	-0.0152002	-0.449237	-0.43751	0.162804	0.156328	0.455195	0.173928	0.536258	0.106426	0.30102	0.119628	0.238495	0.177098	NA	NA		0.499688	0.499255	0.499842
B9A064	4.63993e+06	2.00551e+06	2.65455e+06	1.93762e+06	1.859e+06	1.87718e+06	2.31928e+06	2.09957e+06	2.07555e+06	2.36526e+06	2.01553e+06	2.37963e+06	2.82875e+06	1.88061e+06	1.77941e+06	1.90266e+06	1.78063e+06	1.8459e+06	1.52593e+06	2.03365e+06	NA	NA		1.53646	-0.590896	0.11091	-0.398879	-0.614189	-0.314645	-0.48291	-0.296797	0.206234	-0.18601	-0.726789	0.392504	1.15109	0.485347	0.698468	-0.726441	-0.76769	-0.0940356	0.259974	0.19282	NA	NA		0.445209	0.499255	0.499842
E9PAV3	158349	1.03691e+06	307204	444195	662419	536966	885274	836076	255122	841393	1.16249e+06	413527	127298	102467	127040	818745	1.13608e+06	434966	142556	313030	2.88466e+06	3.04338e+06		-1.09402	0.94498	-0.625617	-0.0737634	0.302151	0.327307	0.583332	0.853195	-0.61803	0.724068	1.02131	0.324454	-0.951859	-1.1119	-0.621248	0.488909	0.999172	0.367794	-0.711171	-0.0691355	0.358262	0.130619		0.496409	0.451425	0.499842
E9PRG8	NA	NA	NA	NA	NA	NA	NA	NA	NA	NA	NA	NA	NA	NA	NA	NA	NA	NA	NA	NA	0	0		NA	NA	NA	NA	NA	NA	NA	NA	NA	NA	NA	NA	NA	NA	NA	NA	NA	NA	NA	NA	NA	NA		NA	NA	NA
F5H4B4	NA	NA	NA	NA	NA	NA	NA	NA	NA	NA	NA	NA	NA	NA	NA	NA	NA	NA	NA	NA	0	0		NA	NA	NA	NA	NA	NA	NA	NA	NA	NA	NA	NA	NA	NA	NA	NA	NA	NA	NA	NA	NA	NA		NA	NA	NA
O00124	358365	2228.54	3606.98	3676.31	2665.5	3665.44	103643	4868.67	19095	113629	2848.02	2869.21	4621.05	5346.21	3618.04	3157.18	1822.43	4875.26	2600.05	3865.74	NA	NA		5.93721	-2.09507	-1.47388	-1.52839	-2.48575	-1.12962	3.26105	-0.528093	0.901779	3.56102	-1.87972	-1.41455	0.117203	1.44509	0.899833	-1.93388	-2.84228	-0.100895	0.0056268	-0.700219	NA	NA		0.000253972	0.0769253	0.140574
O00139	15791.9	34075	44784.4	16749.3	58152.7	32438.2	35914.1	31824.7	38290.7	28044.4	66866.8	33178.7	31234.2	6326.4	6098	53660.2	55142.3	14292.2	13181.9	60638	42225.1	54643.8		-0.597034	-0.0840451	0.158677	-1.1353	0.124895	0.0728242	-0.421149	0.026134	-0.00616245	-0.600277	0.691361	0.289008	0.978859	-0.468469	-0.588994	0.242267	0.280849	-0.479413	0.105292	1.52513	0.314941	0.0889803		0.499688	0.499255	0.499842
O00148	0	0	0	0	0	0	0	0	0	0	0	0	0	0	0	0	0	0	0	0	275481	396650		NA	NA	NA	NA	NA	NA	NA	NA	NA	NA	NA	NA	NA	NA	NA	NA	NA	NA	NA	NA	-0.0732224	0.129203		NA	NA	NA
O00151	1698.91	64638.3	10220.1	78460.1	78272.1	41120.2	63597.6	38586.2	6364.91	39274.5	88575.8	25070.1	8408.64	1800.09	7893.77	51019.8	28630.6	3176.47	7101.78	7750.24	258653	230945		-3.04273	1.73916	-1.1639	2.03932	1.45274	1.30097	1.30822	1.17739	-1.79157	0.778915	1.98281	0.749819	-0.104359	-0.438456	0.647832	1.04633	0.183575	-1.84515	0.0372708	-0.655899	0.609123	-0.166599		0.0379226	0.187043	0.276991
O00154	121861	232143	214578	226787	318043	201003	230970	181878	205592	178912	247380	156482	94830.4	48807.5	69066.3	249985	276028	154749	67127.5	122369	72553.9	217865		-0.240512	0.176524	0.139208	0.270509	0.445607	0.21668	-0.0793976	-0.0419819	0.174769	-0.316205	0.124693	0.125453	-0.0470194	-0.610202	-0.063217	0.0842542	0.23374	0.266819	-0.389724	-0.102055	-1.67121	-0.381838		0.499688	0.499255	0.499842
O00159	NA	NA	NA	NA	NA	NA	NA	NA	NA	NA	NA	NA	NA	NA	NA	NA	NA	NA	NA	NA	3.28311e+06	820908		NA	NA	NA	NA	NA	NA	NA	NA	NA	NA	NA	NA	NA	NA	NA	NA	NA	NA	NA	NA	1.86133	-0.700757		NA	NA	NA
O00161	NA	NA	NA	NA	NA	NA	NA	NA	NA	NA	NA	NA	NA	NA	NA	NA	NA	NA	NA	NA	70552.3	14030.9		NA	NA	NA	NA	NA	NA	NA	NA	NA	NA	NA	NA	NA	NA	NA	NA	NA	NA	NA	NA	0.518081	-2.71453		NA	NA	NA
O00165	47253.5	2358.23	561.902	4543.13	2894.09	1503.92	4224.44	1660.23	3074.59	6146.16	4783.11	76840.4	8569.77	296.2	468.65	10343.7	13352.9	5642.7	1455.14	20455.6	NA	NA		3.5705	-1.03567	-3.19642	-0.349598	-1.38414	-1.48244	-0.57288	-1.1094	-0.976901	0.194303	-0.0596198	4.39532	1.95048	-1.93264	-1.26172	0.88307	1.11296	1.06036	0.133102	2.65788	NA	NA		0.0578218	0.43458	0.000104878
O00178	102566	164149	165032	87323.7	197917	97232.3	103895	110956	89005.5	94750.8	193454	97499.3	61829.9	56050.5	23048.4	197629	212446	92051.5	40642.7	118204	28285.7	31477.3		0.266995	0.376841	0.331238	-0.519296	0.238806	-0.162624	-0.619897	-0.0317902	-0.49978	-0.588697	0.440542	0.0798797	0.0716239	0.697157	-0.738744	0.40145	0.520974	0.362571	-0.277299	0.659969	-0.0717421	-0.426346		0.499688	0.499255	0.499842
O00193	39157.8	272293	201577	380004	300630	219704	293296	208234	224938	228896	422014	231706	114152	49913	85124.9	240369	292655	185808	99415.3	112554	268394	671476		-2.04019	0.278051	-0.0408627	0.924501	0.293096	0.244572	0.172127	0.0511956	0.264371	-0.0503002	0.797548	0.621443	0.120115	-0.773833	0.0884038	-0.0892191	0.206835	0.38519	0.0531036	-0.349331	-1.11752	-0.0830448		0.217755	0.499255	0.499842
O00203	34389.9	20528	20534.9	248271	24284.4	15575.1	36313.5	18568.2	24631	16835.8	20138	21806.5	18614	7983.94	4275.11	15829.9	16909.9	13713.2	2088.37	895664	1220.31	8433.53		0.841142	-0.529498	-0.694349	3.1441	-0.913917	-0.726263	-0.116427	-0.424299	-0.400796	-1.07473	-0.782092	-0.0504849	0.515415	0.20109	-0.730854	-1.29226	-1.19067	-0.241658	-2.23235	5.79562	-2.88771	-1.65038		0.499688	0.499255	0.498446
O00231	124324	83114.7	69735.4	82503.2	98431.6	76150.4	112267	89094.2	109334	96171	74792.6	47756.1	42889.7	51305.6	49392.5	141705	113120	51548.7	35898.2	69080.1	586892	344292		0.850429	-0.310521	-0.565645	-0.24559	-0.376321	-0.210312	-0.14966	-0.0605902	0.182399	-0.21916	-0.627618	-0.646195	-0.179386	0.694836	0.587519	0.263574	-0.0610513	-0.242818	-0.211039	0.129967	1.609	0.38187		0.499688	0.499255	0.499842
O00232	185858	45698.5	104845	125688	121628	38926.5	119468	83447.4	252310	62559.8	126796	37043.9	9438.67	3021.6	11905.4	213397	267483	72345.9	7204.15	62713.6	55050.5	65380.2		1.88196	-0.815605	0.326546	0.724201	0.168865	-0.806684	0.272833	0.268221	1.72792	-0.514806	0.50649	-0.659081	-1.9944	-2.82817	-0.918433	1.195	1.54051	0.748552	-2.08808	0.44317	0.569127	0.274436		0.365192	0.497436	0.499842
O00233	34922.8	74510.1	65470.8	37957.7	81124.4	33399.7	59611.9	45159.5	61313.2	36220.1	69973.8	16780.1	38047.4	5680.06	4363.51	50762.7	69965.6	35121.6	11452.3	21801.9	22376.8	23626.3		0.294644	0.796486	0.435149	-0.21676	0.312069	-0.176105	0.0367377	0.277386	0.388732	-0.5158	0.474756	-1.02141	0.990413	-0.910503	-1.33961	-0.137952	0.340828	0.571803	-0.350973	-0.29823	0.958936	0.428066		0.499688	0.499255	0.499842
O00237	6088.85	2459.88	3754.75	3232.95	9875.3	2663.13	1212.78	5803.1	4530.34	5579.68	1.32398e+06	720.92	1430.44	10574.7	454.997	37221.7	5632.58	1506.8	547.872	2336.08	NA	NA		0.277154	-1.27203	-0.667932	-1.12729	0.167802	-0.923417	-2.76432	0.459239	-0.659515	-0.27148	8.10371	-2.90061	0.0192948	3.1568	-0.534922	2.49704	-0.484023	-1.22689	-1.64498	-0.871023	NA	NA		0.499688	0.353584	0.499842
O00264	3.45706e+06	247489	249030	386130	281300	159340	220973	144053	316292	198204	138119	57432.2	210147	14887.7	16222.4	164081	133973	60996.4	40467.3	120152	2.04085e+06	4.73589e+06		4.78334	0.272985	0.430291	1.0954	0.356914	-0.0821407	-0.0972003	-0.345419	0.950747	-0.107105	-0.718989	-1.29228	1.18073	-2.45095	-2.23851	-0.509494	-0.805017	-1.13206	-1.14029	-0.1039	0.869604	1.79218		0.00506151	0.499255	0.499842
O00267	489399	180105	170246	277702	243345	142793	154958	134933	144368	124772	213825	169742	125489	71480.5	97217.6	195263	199217	145523	87027	99469.4	382759	172758		1.86717	-0.162742	-0.182126	0.602677	0.062613	-0.261232	-0.642913	-0.451533	-0.336521	-0.819958	-0.0565054	0.273098	0.405384	0.0276532	0.502064	-0.24878	-0.215249	0.228691	0.046116	-0.369056	1.27149	-0.272375		0.365192	0.499255	0.499842
O00268	101871	390419	299685	166643	269279	255823	447686	367163	213018	275718	412208	275582	109928	211318	143842	537690	368398	238791	211004	181981	NA	NA		-1.1297	0.286183	0.0494446	-0.82821	-0.366523	-0.0385556	0.297898	0.392283	-0.282956	-0.274257	0.247811	0.394969	-0.447766	0.832526	0.34815	0.60278	0.0409894	0.237544	0.662669	-0.148728	NA	NA		0.487788	0.499255	0.499842
O00273	1838.03	13310.5	25166.5	19819.1	28152.4	18303.1	15727.5	13999	9227.74	5375.66	18033	13636.4	7422.16	109.503	2432.26	5233.66	2235.36	10932.5	5835.06	4943.99	1850.67	17658.3		-2.15475	0.410053	1.25688	0.82886	0.882818	1.10015	0.232704	0.863851	-0.36391	-1.20378	0.708816	0.753878	0.644925	-3.51749	0.105591	-1.33557	-1.64335	0.923046	1.01779	-0.496007	-2.64109	0.117607		0.186125	0.499255	0.165976
O00299	64386.4	301126	190743	170331	341795	166750	195402	174331	147121	187988	173963	31087.8	43867.1	74090.1	34443.3	258858	235093	134142	30927.9	130116	324619	517300		-0.799439	0.951538	0.364016	0.237944	0.956543	0.333177	0.0661523	0.287568	0.0830818	0.151146	-0.00872055	-1.8816	-0.802157	0.380135	-0.719669	0.527738	0.386115	0.434506	-1.15993	0.377472	-0.715365	-0.363234		0.499688	0.450725	0.499842
O00303	132690	355695	230941	458386	245518	237390	283126	234125	189298	248017	217273	47397.5	68890.5	97795.6	62459.8	333581	312406	77924.1	81578.9	120541	229170	410748		-0.190449	0.731055	0.184978	1.24446	0.00327197	0.393935	0.152669	0.260534	-0.000669485	0.0983394	-0.144875	-1.71777	-0.596682	0.317032	-0.306234	0.43867	0.342603	-0.845364	-0.18716	-0.20389	-0.347404	0.182305		0.499688	0.499255	0.499842
O00308	24902.5	9925.61	27041.8	16460.7	88101.6	79986.4	17943.6	9544.48	68466	17728.8	3367.67	84909.9	4583.63	1492.5	3739.38	9351.25	9343.31	6894.22	7148.75	8793.79	NA	NA		1.08207	-0.870229	0.477181	-0.180903	1.75739	2.48509	-0.424789	-0.640419	1.86755	-0.263941	-2.72044	2.73665	-0.846198	-0.495818	-0.139484	-1.3506	-1.35753	-0.534158	0.405837	-0.373119	NA	NA		0.499688	0.484236	0.499842
O00410	180246	385729	405084	481630	573935	338013	600328	379971	693775	334477	487791	372450	431270	66267.9	63888.7	742290	646759	271129	103489	354082	502761	958031		-0.610997	-0.115557	0.142255	0.399074	0.417408	0.0136026	0.370287	0.073756	1.15342	-0.330672	0.125469	0.49562	1.23184	-1.29834	-1.23811	0.710093	0.51793	0.0537434	-0.777609	0.481962	-0.316818	0.314854		0.499688	0.499255	0.499842
O00411	979093	1.61388e+06	851932	1.2839e+06	1.81553e+06	1.30779e+06	1.77558e+06	783181	469235	895866	1.71075e+06	717131	428532	501145	487970	3.3298e+06	1.93547e+06	770262	365975	387693	NA	NA		0.394475	0.288285	-0.400376	0.217413	0.539357	0.358775	0.341062	-0.568416	-0.940574	-0.448785	0.270055	-0.158928	-0.44931	-0.16696	0.019887	1.31318	0.536063	-0.130136	-0.651424	-1.05468	NA	NA		0.499688	0.499255	0.499842
O00425	7871.75	40303.5	12704.2	13201.4	18240.8	6352.86	16381.2	11866.7	13131.5	39160.2	15564.9	7245.11	4431.95	2411.15	2746.07	16428.4	14287.1	4891.66	2564.69	7255.52	71394.7	121560		-0.114929	1.75373	-0.120525	0.024781	-0.0736543	-0.787602	-0.0233346	0.222293	-0.0801993	1.44952	0.12391	-0.427349	-0.35647	-0.284748	-0.0728124	0.0365349	-0.175641	-0.511312	-0.597407	-0.123698	0.28488	0.474663		0.499688	0.181172	0.499842
O00429	NA	NA	NA	NA	NA	NA	NA	NA	NA	NA	NA	NA	NA	NA	NA	NA	NA	NA	NA	NA	39370.5	128381		NA	NA	NA	NA	NA	NA	NA	NA	NA	NA	NA	NA	NA	NA	NA	NA	NA	NA	NA	NA	-2.14353	-0.754671		NA	NA	NA
O00483	326430	78267.9	197459	154345	189584	207451	139548	74782.2	263993	210894	134607	187568	124135	40791.3	82361.4	207220	156440	118036	95851.1	162637	1261.14	17430.4		1.46316	-1.26709	0.0253111	-0.22075	-0.41039	0.429456	-0.741361	-1.14952	0.551404	0.0461459	-0.652939	0.505622	0.582542	-0.22985	0.685947	-0.0931164	-0.500906	0.218159	0.497604	0.607417	-1.42884	0.904618		0.462797	0.356637	0.499842
O00487	265444	89809.9	119663	33517.7	102058	69369.9	137300	86480.9	258397	82938.7	56975.7	48602	13947.4	22437.7	30749	111797	164485	42133	51820.7	47817.9	80032.8	225023		2.1376	-0.0529316	0.344589	-1.46745	-0.241303	-0.203519	0.274629	0.0534067	1.57232	-0.309861	-0.901594	-0.486619	-1.69021	-0.274152	0.10064	0.0371424	0.623537	-0.357827	0.520851	-0.239083	-0.418499	0.633883		0.309069	0.499255	0.499842
O00505	9060.28	1818.58	7824.9	1559.3	21407.3	1340.6	1241.42	1751.16	11305.8	12869.1	16855.6	6519.16	4108.04	2120.13	1672.03	20156.1	19156.8	6829.6	2258.56	0	17944	64394.7		0.653456	-1.18737	-0.184485	-1.53751	0.800314	-1.43587	-2.18978	-0.907714	0.305129	0.421648	0.906982	0.0218764	0.129616	0.181206	-0.134577	0.987166	0.875573	0.589328	-0.0970524	NA	-0.518072	-0.24676		0.499688	0.39739	0.499842
O00519	NA	NA	NA	NA	NA	NA	NA	NA	NA	NA	NA	NA	NA	NA	NA	NA	NA	NA	NA	NA	8218.64	1.07328e+06		NA	NA	NA	NA	NA	NA	NA	NA	NA	NA	NA	NA	NA	NA	NA	NA	NA	NA	NA	NA	0.279619	7.46182		NA	NA	NA
O00541	NA	NA	NA	NA	NA	NA	NA	NA	NA	NA	NA	NA	NA	NA	NA	NA	NA	NA	NA	NA	11478.1	13887.3		NA	NA	NA	NA	NA	NA	NA	NA	NA	NA	NA	NA	NA	NA	NA	NA	NA	NA	NA	NA	0.439636	0.113709		NA	NA	NA
O00560	0	116.093	0	0	73119.1	27175.7	0	0	39184.9	9800.13	2996.42	39802.7	0	0	2167.86	0	15141	1959.66	1364.75	334.737	564.315	3268.97		NA	-6.60057	NA	NA	2.46169	1.8385	NA	NA	1.92126	-0.179597	-0.804338	2.48823	NA	NA	0.0492022	NA	0.294953	-0.495312	0.0136881	-3.40461	-3.27345	-2.27384		NA	2.06e-14	NA
O00567	14622.3	14259.1	7655.17	20041.7	25583	10906.1	19695.8	6768.14	9699.65	33109.7	17763.3	38059.6	5760.81	485.687	1857.42	12613.9	40465.6	4140.41	2524.44	9408.29	7199.28	5698.73		0.594596	0.13343	-0.90981	0.487289	0.35689	-0.0544307	0.185384	-0.612966	-0.654795	1.11589	0.292269	1.91536	-0.100024	-1.68526	-0.6777	-0.41428	1.26153	-0.889035	-0.620658	0.102868	-0.380195	-1.32579		0.499688	0.499255	0.403404
O00571	424893	902174	1.02996e+06	638927	1.19537e+06	697411	1.00625e+06	972102	353994	735511	1.25403e+06	715179	510951	502186	387231	1.14802e+06	956670	640213	441268	636671	2.17237e+06	2.63331e+06		-0.461564	-0.163012	0.29499	-0.410036	0.313737	-0.16912	-0.100806	0.178081	-0.96819	-0.334312	0.230493	0.256389	0.232382	0.297657	0.114933	0.116448	-0.121086	0.031956	0.0591451	0.108028	0.196844	0.199201		0.499688	0.499255	0.499842
O00592	0	0	0	0	0	0	0	0	1776.93	0	0	645136	0	0	822.884	0	0	0	0	0	NA	NA		NA	NA	NA	NA	NA	NA	NA	NA	-3.56112	NA	NA	7.13546	NA	NA	-2.02969	NA	NA	NA	NA	NA	NA	NA		NA	NA	NA
O00629	8691.02	24597.8	12826.5	3663.07	12978.3	10874.7	19345.6	20145.5	0	39262.1	0	11297.8	2511.59	679.073	2636.17	43284.6	35561.9	9687.74	6857.69	7531.95	33085.9	30628.8		-0.104481	0.990143	-0.110633	-1.98541	-0.614374	-0.0190365	0.19979	1.04167	NA	1.41322	NA	0.161464	-0.251827	-1.14947	-0.119181	1.46058	1.12113	0.430089	0.899988	-0.168885	1.23401	0.519306		0.499688	0.439469	0.499842
O00743	57010.2	68225.8	81070.5	79862.4	64651.5	49334.3	94195	77484.7	45954.4	68455.8	27714.2	18293.1	25761.8	0	0	99438.7	162444	11548.6	10796.6	78043.1	NA	NA		0.636791	0.294034	0.465349	0.565294	-0.262774	0.0524045	0.438565	0.676861	-0.301525	0.13156	-1.26807	-1.2232	0.0023183	NA	NA	0.582207	1.33533	-1.50523	-1.00291	1.29632	NA	NA		0.499688	0.499255	0.499842
O00763	NA	NA	NA	NA	NA	NA	NA	NA	NA	NA	NA	NA	NA	NA	NA	NA	NA	NA	NA	NA	0	0		NA	NA	NA	NA	NA	NA	NA	NA	NA	NA	NA	NA	NA	NA	NA	NA	NA	NA	NA	NA	NA	NA		NA	NA	NA
O00764	0	12610.9	15311.1	0.67415	1638.53	931.839	9.85965	1266.18	23.9359	4199.51	1144.37	684.5	531.759	57.2854	126.436	119.709	17.1179	137.88	316.889	917.45	NA	NA		NA	5.40567	6.28604	-9.23483	2.77811	2.72483	-5.57342	2.56163	-4.76797	3.75295	1.92917	0.33097	1.32626	-0.368825	0.148339	-1.7344	-5.0762	-0.654124	1.73651	1.13239	NA	NA		NA	4.5e-09	7.32e-22
O00767	191548	11877.3	65908.2	39485.8	14853.6	18318.9	31099.5	14818.8	19272.8	21287.5	2988.65	502.921	6152.77	323.828	692.446	12171.3	3479.37	193.526	0	5028.17	1.16461e+06	2.74614e+06		4.85636	0.0807652	2.49721	1.89544	-0.120528	0.970623	1.13225	0.60755	0.754329	0.750828	-2.19292	-3.15939	0.287665	-2.14991	-1.12805	-0.203516	-2.07067	-4.12375	NA	-0.422267	0.359615	1.04798		0.00433294	0.499255	0.000926393
O14524	3054.86	0	0	1.6023	0	1.44705	0	0	0	0	0	0	0	0	0	0	0	0	0	0	NA	NA		5.22516	NA	NA	-8.00015	NA	-6.6971	NA	NA	NA	NA	NA	NA	NA	NA	NA	NA	NA	NA	NA	NA	NA	NA		0.00181216	NA	NA
O14529	34105.9	12773	1995.28	511323	35599.8	12693.4	3822.9	6629.39	13387.2	3610.95	1384.17	5219.57	1986.68	230.138	1597.47	2285.39	2054.6	2745.42	3204.52	3284.81	NA	NA		2.7004	0.962	-1.90009	6.28941	1.85174	1.17752	-1.28773	0.392748	0.750968	-1.19467	-2.51417	-0.132007	-0.761403	-2.86826	0.0799517	-1.97586	-2.24997	-0.564602	0.762915	-0.573578	NA	NA		0.185037	0.449335	0.0425423
O14530	NA	NA	NA	NA	NA	NA	NA	NA	NA	NA	NA	NA	NA	NA	NA	NA	NA	NA	NA	NA	2529.73	19189.5		NA	NA	NA	NA	NA	NA	NA	NA	NA	NA	NA	NA	NA	NA	NA	NA	NA	NA	NA	NA	-0.708523	0.818057		NA	NA	NA
O14545	5586.79	861.937	1591.97	9762.22	4119.96	3254.93	40790.4	1999.47	2028.41	5094.76	3794.2	8428.11	15300.6	2834.56	1726.19	2236.64	5256.42	6672.71	4655.82	19302	231680	303022		0.391314	-2.86666	-2.09085	0.621031	-1.19061	-0.684258	2.4385	-1.27734	-1.79108	-0.496054	-0.849662	0.864031	2.54587	1.07537	0.375958	-1.82269	-0.588783	1.01433	1.4427	2.37559	1.19232	0.992922		0.499688	0.00612856	0.0231514
O14578	NA	NA	NA	NA	NA	NA	NA	NA	NA	NA	NA	NA	NA	NA	NA	NA	NA	NA	NA	NA	0	0		NA	NA	NA	NA	NA	NA	NA	NA	NA	NA	NA	NA	NA	NA	NA	NA	NA	NA	NA	NA	NA	NA		NA	NA	NA
O14579	90226.2	23909.5	35622.8	13943.5	26895.1	12046	26054.6	8016.55	10283.8	16731.8	10104.8	1241.78	6790.24	543.871	644.818	2601.09	22067.2	3679.19	948.629	2156.21	NA	NA		3.73989	1.33087	1.81295	0.346553	0.843793	0.507509	1.02297	0.0572849	-0.173333	0.513822	-0.135262	-2.81959	0.553476	-2.15899	-1.85671	-2.38635	0.771594	-0.66933	-1.6784	-1.7171	NA	NA		0.0432137	0.334488	0.0288377
O14602	44406.9	206476	148687	108611	234420	123594	160320	129076	113683	124444	194974	63555.4	25177.5	16275.5	38168.6	116099	147171	42165	33881.4	18030.6	208046	372570		-0.634254	1.10166	0.646731	0.244828	1.01952	0.5737	0.452578	0.542929	0.329318	0.229264	0.862225	-0.148423	-0.921987	-1.03795	0.214992	0.0322552	0.392916	-0.518446	-0.26843	-1.83367	-1.02391	-0.552948		0.499688	0.428881	0.498201
O14617	60141.2	76255.5	52431.2	72857.7	61598.2	50013.8	113375	71822.5	39651.5	132361	46042.2	91957.4	49391.5	12155.9	13094	157151	132507	42330.9	27661.8	119613	724258	435300		0.0346108	-0.171175	-0.715633	-0.157611	-0.794587	-0.567379	0.13591	-0.115857	-1.05213	0.525277	-1.08016	0.598898	0.295604	-1.20182	-1.13296	0.686888	0.443414	-0.276898	-0.338722	1.20781	1.07095	-0.11069		0.499688	0.499255	0.487969
O14639	108567	190617	295688	321203	184563	197464	224467	257708	80655.9	155396	232009	97510.3	83582.6	75708.3	52589.9	143148	187860	115528	101046	121027	3.66248e+06	1.29763e+06		-0.264675	0.000404783	0.787553	0.93001	-0.172382	0.342536	0.0312821	0.625308	-0.99697	-0.368169	0.16251	-0.406841	-0.08648	0.0941878	-0.375044	-0.604548	-0.196228	-0.0683842	0.331818	0.0144077	1.99289	0.119325		0.499688	0.499255	0.428075
O14654	1.5472e+06	1.25991e+06	1.30262e+06	1.05361e+06	1.60025e+06	1.49827e+06	1.44765e+06	1.02881e+06	1.54711e+06	1.37196e+06	1.52577e+06	2.64859e+06	1.43098e+06	1.301e+06	811186	1.76194e+06	2.02399e+06	1.57054e+06	1.02043e+06	2.00257e+06	2.03814e+06	4.47654e+06		0.42358	-0.745333	-0.417912	-0.748461	-0.306947	-0.105105	-0.629005	-0.817766	0.235676	-0.46204	-0.580889	1.11267	0.682955	0.536812	0.0851995	-0.303114	-0.0483305	0.239453	0.211698	0.734539	-0.360301	0.564451		0.499688	0.499255	0.499842
O14737	31566.7	324477	166306	190809	229740	166638	162584	118314	111466	180036	153881	23523.8	16409.5	13428.3	9899.28	106326	104876	59992	13891.5	25857.5	391564	660938		-1.03272	1.88599	0.932476	1.20072	1.11276	1.13237	0.588924	0.52461	0.420407	0.892093	0.623217	-1.51093	-1.44824	-1.23145	-1.69184	0.0147685	0.00126578	0.109289	-1.49021	-1.1904	-0.583272	-0.191155		0.499688	0.136614	0.355927
O14744	1.27018e+07	2.9871e+07	2.46833e+07	2.33859e+07	2.21217e+07	2.70756e+07	36786328	3.78978e+07	1.97979e+07	2.32336e+07	3.24781e+07	1.81311e+07	1.40235e+07	1.81693e+07	1.3571e+07	3.25582e+07	2.83998e+07	2.33663e+07	1.85759e+07	2.25108e+07	2.62228e+07	2.04049e+07		-0.663516	-0.00750178	-0.0369662	-0.198841	-0.298896	0.122653	0.0935994	0.4997	0.341325	-0.223307	-0.0835661	-0.267117	-0.257331	-0.114274	-0.0260339	0.0786365	-0.02458	-0.0384854	0.268615	0.0643123	-0.387688	-0.778947		0.499688	0.499255	0.499842
O14745	NA	NA	NA	NA	NA	NA	NA	NA	NA	NA	NA	NA	NA	NA	NA	NA	NA	NA	NA	NA	35825.9	51991.8		NA	NA	NA	NA	NA	NA	NA	NA	NA	NA	NA	NA	NA	NA	NA	NA	NA	NA	NA	NA	-0.0822492	-0.128571		NA	NA	NA
O14763	39295.5	49346	46199.5	73041.1	182751	166126	64192.4	13493.3	316996	26052.3	8528.58	463977	27815.2	2950.25	25707.9	28324.4	10761.9	5636.36	16220	14426.9	NA	NA		0.415398	0.132756	-0.0928194	0.746452	1.58333	2.2123	0.156397	-1.62417	2.90293	-1.02155	-2.72665	3.96539	0.46025	-1.99689	1.14117	-1.01578	-2.47342	-2.2324	-0.0026829	-0.931565	NA	NA		0.499688	0.499255	0.499842
O14776	NA	NA	NA	NA	NA	NA	NA	NA	NA	NA	NA	NA	NA	NA	NA	NA	NA	NA	NA	NA	145397	137326		NA	NA	NA	NA	NA	NA	NA	NA	NA	NA	NA	NA	NA	NA	NA	NA	NA	NA	NA	NA	0.151398	-0.46873		NA	NA	NA
O14818	579835	362626	295681	328050	401469	232180	470930	420550	282124	289770	343311	69290.7	159652	78901.1	77769.8	352358	546025	167718	89006.5	234623	609601	741105		1.42296	0.118368	-0.0217624	0.138804	0.183248	-0.23416	0.317736	0.53685	0.0923814	-0.246576	-0.0803964	-1.71392	0.061858	-0.701849	-0.625746	-0.086114	0.574586	-0.344867	-0.684063	0.179187	0.126497	0.0875349		0.474751	0.499255	0.499842
O14828	29931	45963.5	35614	76128.9	91807.3	30899	35817.3	23328.6	192130	38285.5	46389.1	102102	41225	57818.8	14897.9	33855.7	40359.8	50396.7	35443.2	41476.4	NA	NA		-0.593199	-0.545638	-0.99773	0.251614	0.0551566	-0.901667	-1.25087	-1.38785	1.63163	-0.978489	-0.719767	1.13645	0.456503	1.78039	-0.387366	-1.27072	-0.994972	0.460999	0.521355	0.0843962	NA	NA		0.499688	0.499255	0.362513
O14893	6418.18	12787.6	20641.8	13741.7	23920.8	18673.1	26021.6	24333.9	28914	26061.7	28005.1	25310.8	50848.3	6736.04	4088.83	19758.8	36212.7	17496.2	16593.4	23870.4	NA	NA		-1.27188	-0.840455	-0.291888	-0.769809	-0.544301	-0.0536447	-0.212968	0.383377	0.240586	-0.0226509	0.112616	0.576499	2.44509	0.362744	-0.399565	-0.565757	0.347539	0.533019	1.26661	0.81748	NA	NA		0.440408	0.493979	0.499842
O14929	8067.49	93280.9	84387.9	71942.1	510695	72300.7	88302.4	68501.7	45585.6	68215.9	65863.7	4736.39	38500.7	1865.13	5651.67	65416.1	72718	19145.1	15669.3	33020.3	38469.1	66820.9		-1.86012	1.15649	0.879102	0.795969	3.16607	1.02302	0.702179	0.892125	0.0549616	0.499437	0.426831	-2.831	1.02093	-2.57176	-1.04247	0.31668	0.476366	-0.303297	0.0291642	0.39242	-0.913941	-0.673096		0.267776	0.411209	0.377235
O14936	26.4342	0	0	1059.89	1425.48	0	0	0	673.122	72.8863	0	0	0	0	0	0	1110.12	0	0	0	0	0		-5.60895	NA	NA	0.664231	1.09104	NA	NA	NA	-0.0533917	-3.23377	NA	NA	NA	NA	NA	NA	0.83884	NA	NA	NA	NA	NA		6.23e-06	NA	NA
O14939	NA	NA	NA	NA	NA	NA	NA	NA	NA	NA	NA	NA	NA	NA	NA	NA	NA	NA	NA	NA	0	0		NA	NA	NA	NA	NA	NA	NA	NA	NA	NA	NA	NA	NA	NA	NA	NA	NA	NA	NA	NA	NA	NA		NA	NA	NA
O14950	4.89472e+06	4.63156e+06	4.52238e+06	1.21359e+07	2.42452e+06	3.13077e+06	3.34513e+06	3.71773e+06	1.79169e+06	4.40808e+06	8.14724e+06	3.53462e+06	1.06583e+06	1.88139e+06	1.33133e+06	5.46984e+06	5.12359e+06	3.84118e+06	2.10032e+06	2.30261e+06	4.87589e+08	1.61521e+08		0.835055	0.0356183	0.253552	1.64729	-0.818801	-0.22972	-0.630368	-0.100819	-0.503309	0.0996511	0.680117	0.199452	-1.12611	-0.441693	-0.520841	0.21205	0.193805	0.214371	-0.0313977	-0.415174	2.17694	0.437211		0.499688	0.499255	0.499842
O14964	NA	NA	NA	NA	NA	NA	NA	NA	NA	NA	NA	NA	NA	NA	NA	NA	NA	NA	NA	NA	33371.9	98641.9		NA	NA	NA	NA	NA	NA	NA	NA	NA	NA	NA	NA	NA	NA	NA	NA	NA	NA	NA	NA	-1.45313	-0.312294		NA	NA	NA
O14967	222764	67082.3	173380	398595	163095	243832	274050	285839	263189	135021	317856	381983	440245	505801	460524	447984	251131	487262	494816	660525	NA	NA		-0.243964	-2.70031	-1.08023	0.174599	-1.41901	-0.423298	-0.751855	-0.299064	-0.23662	-1.64762	-0.463377	0.596702	1.33557	1.80502	1.77993	0.0135851	-0.846328	0.994511	1.62742	1.48478	NA	NA		0.499688	0.0124718	0.325138
O14974	6212.58	50143.4	37052	65723.6	18094.9	18082.5	15929.3	31579.5	20312.7	37702.8	53918.7	16383.8	6516.17	4689.02	3668.24	46411.6	44955.8	13695	8998.3	12727.4	1.01489e+07	3.95811e+06		-1.44362	1.08693	0.611218	1.54353	-0.801434	-0.19786	-0.921136	0.5596	-0.201241	0.525788	1.02483	-0.0968292	-0.817731	-0.609525	-1.06481	0.738504	0.702839	-0.0270961	-0.0819419	-0.205322	2.03138	0.150158		0.380708	0.432212	0.499842
O14975	19610.3	2048.32	14424.8	2628.01	2014.08	3486.62	1154.3	2159.93	7542.42	1447.05	1898.37	5649.54	72741.4	1445.68	2197.37	4222.23	6288.16	968.859	1906	38134.3	NA	NA		2.00832	-1.5959	1.30882	-1.48178	-2.27779	-0.565418	-2.88764	-1.08234	0.0667276	-2.35798	-1.82224	0.163615	4.85578	0.10743	0.750716	-0.836218	-0.364675	-0.894148	0.186761	3.29995	NA	NA		0.344378	0.22341	0.148935
O14979	4541.4	46389.2	33807.2	31932.4	45863.3	18137.8	48274.3	31628.2	23621.3	39335.2	59979.8	24918.9	5869.53	6070.93	6367.61	55606.2	35179.7	19980.8	17009.3	25983.1	135528	281259		-2.14168	0.687006	0.0753777	0.152907	0.131205	-0.467703	0.360481	0.314753	-0.369925	0.23947	0.851827	0.198526	-1.20345	-0.232667	-0.270308	0.63405	-0.04853	0.332224	0.741432	0.599284	0.110553	0.604865		0.188846	0.499255	0.499842
O14980	919335	301812	302025	474258	274017	274298	292855	244740	343154	356175	203869	122279	327701	119579	89193.4	437853	388710	166757	128524	265009	122154	539767		2.05766	-0.1679	-0.0368745	0.655801	-0.441815	-0.0232856	-0.428056	-0.306454	0.296925	0.0099198	-0.88343	-0.926787	1.09116	-0.0744538	-0.44139	0.204717	0.0310004	-0.374778	-0.163507	0.326376	-0.966178	0.914593		0.333832	0.499255	0.499842
O15013	1868.69	14827.1	17895.3	5920.77	15546.2	17211.8	15202.2	11450.4	19792.6	16391.9	51383.9	24598.8	5610.74	4587.93	3357.27	26884.3	19150.4	18347.5	2196.29	22235.6	NA	NA		-2.63826	-0.0454233	0.0806623	-1.52749	-0.644516	0.383587	-0.454873	-0.123656	0.200644	-0.169575	1.61828	1.0734	-0.338642	0.381631	-0.062315	0.461883	-0.0664794	1.14735	-1.1277	1.22053	NA	NA		0.0882449	0.499255	0.499842
O15020	0	0	0	0	0	0	0	0	0	0	0	0	0	0	0	0	0	0	0	0	82720.4	13995.8		NA	NA	NA	NA	NA	NA	NA	NA	NA	NA	NA	NA	NA	NA	NA	NA	NA	NA	NA	NA	3.94602	0.469639		NA	NA	NA
O15027	NA	NA	NA	NA	NA	NA	NA	NA	NA	NA	NA	NA	NA	NA	NA	NA	NA	NA	NA	NA	89350.1	232543		NA	NA	NA	NA	NA	NA	NA	NA	NA	NA	NA	NA	NA	NA	NA	NA	NA	NA	NA	NA	0.953531	1.84164		NA	NA	NA
O15042	764205	1.00191e+06	927670	954003	847652	850591	1.60254e+06	1.09505e+06	795933	1.07446e+06	1.28517e+06	1.04345e+06	737947	768349	596316	1.04404e+06	1.02448e+06	717450	593933	771698	395046	414812		0.0889037	-0.305284	-0.16744	-0.119513	-0.508465	-0.177881	0.282796	0.0562972	-0.0876168	-0.0842904	-0.0284778	0.515455	0.474858	0.656943	0.470485	-0.333241	-0.332594	-0.0897936	0.206597	0.087116	-0.877099	-1.09844		0.499688	0.499255	0.499842
O15049	159312	942405	119485	378471	191128	94590.9	301474	256132	114082	2.20177e+06	432791	340916	257033	1.12965e+06	334750	338605	500487	761465	537228	589835	NA	NA		-0.989546	1.01098	-1.89648	-0.16116	-1.42715	-2.11348	-0.867374	-0.729863	-1.7274	2.31742	-0.265977	0.182015	0.263875	2.73025	1.02843	-0.670022	-0.064909	1.40256	1.48099	1.05439	NA	NA		0.499688	0.438476	0.0428656
O15067	19125.3	44064.1	34519.1	24385.8	75368.6	28186.1	48996.6	17505.2	30934.5	35543.6	42099.1	14654.9	8203.94	2771.68	10378.4	34969	45558	10651.9	9908.6	10102.6	151414	136698		0.0815366	0.691845	0.173559	-0.173942	0.926796	0.263879	0.447612	-0.477766	0.0902565	0.157008	0.400293	-0.522491	-0.619384	-1.30572	0.569228	0.0112716	0.401934	-0.521843	0.0468904	-0.735311	0.720111	-0.0364907		0.499688	0.499255	0.499842
O15078	160817	92066.9	35224.6	138138	20965.5	17463.1	22814.3	13131.3	7633.62	42609	38728.1	10455.4	2404.18	1302.68	5048.66	26496.9	14436.9	5730.72	7631.61	9223.97	NA	NA		3.71749	2.28357	0.664303	2.8432	-0.60507	-0.0114164	-0.267054	-0.386011	-1.63243	0.859979	0.75129	-0.616921	-2.01432	-1.96222	0.084342	0.0180822	-0.898416	-1.00851	0.26734	-0.484552	NA	NA		0.0450209	0.0542719	0.487969
O15084	310.443	1322.6	0	0	921.317	0	5743.65	2720.97	284.881	14120.7	13354.5	2601.53	15667.5	3647.3	669.606	19331.7	27294.8	1407.17	0	18075.5	NA	NA		-4.31913	-1.27335	NA	NA	-2.48613	NA	-0.524571	0.258939	-3.91113	1.03336	1.07598	-1.05895	2.51798	1.46561	-0.04371	1.41786	1.81744	-0.384257	NA	3.20735	NA	NA		0.00109392	0.353584	NA
O15120	71569.5	560.977	4112.66	3578.84	2494.97	1163.12	19122.3	585.733	10376.2	11299.5	1325.48	375.448	414.366	291.444	346.227	939.618	819.734	702.677	295.737	1162.11	NA	NA		5.00214	-1.93133	1.24758	0.403327	-0.337503	-0.610187	3.03699	-1.35372	1.99947	2.44574	-0.657764	-2.61841	-1.45009	-0.656604	-0.591978	-1.40741	-1.8415	-0.812145	-0.992496	-0.62897	NA	NA		0.00311788	0.114512	0.168222
O15121	162509	205991	77804.1	77682.4	107712	217267	336422	244586	109292	84483.2	189317	46002.7	78346.5	33796	27040	53199.6	85377.3	87508.4	1658.82	47204.7	NA	NA		1.23358	1.02265	-0.44498	-0.375176	-0.285626	1.3352	1.46845	1.4309	0.145103	-0.452666	0.73149	-0.747146	0.695133	0.0555292	-0.336199	-1.24498	-0.521273	0.524088	-4.87732	-0.473673	NA	NA		0.499688	0.43458	0.499842
O15127	780048	311711	359633	272577	521108	367237	223038	91212.8	442981	125643	140151	930859	67755.3	47483.8	67174.5	54180.2	37437.8	8251.12	40377.3	62490.5	194108	81408.2		2.8645	0.951391	1.20375	0.855456	1.45433	1.43267	0.183765	-0.737255	1.5968	-0.51828	-0.390962	3.08558	-0.213235	-0.224006	0.284	-1.86346	-2.40625	-3.71561	-0.776386	-0.751664	0.428503	-1.25268		0.157233	0.450725	0.188392
O15144	19435.8	22666.8	19210.6	27568.1	30062.7	22071.8	70238.8	50923.2	11569.6	68149.7	54030.3	3479.59	2102.36	2271.43	5755.01	56976.9	67676.5	24077.7	10681.8	9938.25	58429.8	22903.5		0.344219	-0.0496829	-0.464454	0.228046	-0.245361	0.131083	1.20362	1.38609	-1.17283	1.34764	1.01514	-1.40722	-2.39392	-1.34683	0.0078275	0.956113	1.21393	0.933714	0.481949	0.484544	0.246502	-1.75772		0.499688	0.499255	0.499842
O15160	13599.2	49459.3	40369.7	32735.8	58822	45088.1	56765	53091.6	37798.4	57374.7	57070.4	67303.3	36820.3	36324.3	50198.8	118305	75985	29841.2	79302.9	50412.1	49043.3	19669.3		-1.74841	-0.449607	-0.873823	-1.03612	-0.702492	-0.340195	-0.610731	-0.149954	-0.878108	-0.414813	-0.445164	0.46156	0.291072	1.17542	1.53344	0.542669	-0.112892	-0.306573	1.77194	0.363628	0.904029	-1.03198		0.300624	0.499255	0.418166
O15173	25724.6	21642.6	19204.4	69527.5	35316.3	15466.5	22175.8	6982.36	28294.7	31438.2	18711.6	11277.1	53987.8	393.432	2275.66	30214.5	61964.9	13347.7	3179.03	27961.4	45807.6	216317		0.824379	-0.0491435	-0.395189	1.66567	0.0552969	-0.331297	-0.445376	-1.49226	0.218957	0.26184	-0.491938	-0.623615	2.50365	-2.85087	-1.28867	0.077125	1.14864	0.123495	-1.23358	1.05355	0.0464083	1.74586		0.499688	0.499255	0.499842
O15212	NA	NA	NA	NA	NA	NA	NA	NA	NA	NA	NA	NA	NA	NA	NA	NA	NA	NA	NA	NA	252607	105739		NA	NA	NA	NA	NA	NA	NA	NA	NA	NA	NA	NA	NA	NA	NA	NA	NA	NA	NA	NA	2.20539	0.18074		NA	NA	NA
O15226	17878.5	19294.3	15609.5	15658.1	16198.3	18066.2	24996	11824.1	23036.8	25909.4	41378.8	31575	25143.4	20889.1	12381.9	59145.2	47311.4	18193.5	15521.3	35633	53055.4	47210.4		-0.105777	-0.610469	-1.09415	-0.940651	-1.49277	-0.489962	-0.656971	-1.10106	-0.475395	-0.415388	0.298049	0.518648	0.976454	1.63604	0.837597	0.687088	0.357595	0.194293	0.730615	1.02577	1.0849	0.300907		0.499688	0.499255	0.318207
O15258	185164	54111.9	52399.6	510471	99250.9	34578.2	76168.4	53692.8	68063.2	55435.1	79079	104220	117431	31681.5	23107.8	92784	59163.6	67053.9	24748	69672.4	50818.7	112704		1.64006	-0.781939	-0.887173	2.59877	-0.301589	-1.20757	-0.591509	-0.617787	-0.409528	-0.895453	-0.39964	0.671069	1.5204	0.352514	-0.233617	-0.233975	-0.891493	0.387238	-0.518075	0.368713	-0.204077	0.463301		0.421101	0.499255	0.408665
O15269	441762	242317	303581	300409	291136	226028	436373	272922	235859	211528	197092	176296	283697	186650	122911	221209	244613	180012	135746	269326	37740.3	59681.9		1.05075	-0.398945	-0.0442359	0.0076431	-0.420725	-0.270169	0.196467	-0.0792107	-0.339855	-0.72332	-0.863088	-0.377443	0.94646	0.89403	0.239509	-0.750514	-0.591282	-0.0795078	0.0728872	0.461805	0.928527	1.19519		0.499688	0.499255	0.499842
O15270	286287	396475	167611	645595	206179	299331	264371	201868	222542	390704	262754	204927	283330	212261	166114	229323	260767	180668	174761	196180	2798.98	15057.2		0.382123	0.289832	-1.0174	1.06885	-1.05618	0.104514	-0.615463	-0.553464	-0.513729	0.130815	-0.492612	-0.211695	0.921667	1.19185	0.736302	-0.758511	-0.555557	-0.0617877	0.458905	-0.00851843	-1.22708	0.794929		0.499688	0.499255	0.356622
O15294	130304	163151	172855	117425	126934	151658	196776	186682	104599	175129	233601	132759	130892	116890	80883.8	205625	202585	128345	95282.3	121754	47277.8	82360.4		0.0407701	-0.183276	-0.0833402	-0.590259	-0.860666	-0.0604683	-0.186922	0.161314	-0.751453	-0.20155	0.192656	0.00203273	0.601535	1.01848	0.430462	-0.056484	-0.068389	0.228249	0.356443	0.089472	-0.397626	0.00552847		0.499688	0.499255	0.499842
O15347	2616.35	17879.1	10841.4	29955.1	48789.4	14796.5	38294	22583.8	12220.8	46992.5	51740.4	11277.2	1500.87	2108.41	361.043	108643	101349	21439.9	2588.6	4802.32	167402	309698		-2.1527	0.0744393	-0.83081	0.851878	0.990891	0.0259058	0.797413	0.629666	-0.578968	1.29012	1.42912	-0.194261	-2.41995	0.0447836	-2.65638	2.4148	2.30853	1.2427	-1.21003	-0.0925496	-0.455369	-0.148144		0.186125	0.499255	0.434271
O15355	174022	1.35721e+06	285898	211653	305453	211719	337257	247578	237044	850308	344028	388330	230650	187038	111082	397195	319365	251513	156188	227994	665149	1.04613e+06		-0.515351	1.91618	-0.224269	-0.670036	-0.37176	-0.527922	-0.334058	-0.408469	-0.302473	1.20652	-0.237178	0.704908	0.454598	0.409878	-0.257319	-0.065298	-0.37837	0.0980391	-0.00779126	-0.0191701	0.0829539	0.428043		0.499688	0.128692	0.499842
O15371	550304	1.25338e+06	1.1143e+06	919194	1.2482e+06	858648	1.25677e+06	993952	662221	956271	1.18365e+06	712636	631972	587700	551605	1.3389e+06	1.26017e+06	862825	682915	853146	3.23682e+06	7.21253e+06		-0.349022	0.0293901	0.124381	-0.161921	0.0937345	-0.151373	-0.0573504	-0.0850663	-0.298862	-0.226141	-0.159662	-0.0450622	0.256013	0.1986	0.325746	0.0597514	0.00956657	0.163766	0.407711	0.254127	0.397612	1.31966		0.499688	0.499255	0.499842
O15372	181200	424010	379181	322918	423822	326993	417822	393765	182988	353404	555491	329661	211325	187482	229206	405959	421193	194733	214259	157845	575729	513535		-0.560027	0.0777181	0.0901495	-0.1478	0.0104163	0.0124983	-0.121424	0.175518	-0.790947	-0.204792	0.368849	0.356586	0.218267	0.304847	0.713318	-0.13921	-0.0726805	-0.389265	0.355577	-0.672363	0.0364504	-0.462042		0.499688	0.499255	0.499842
O15379	0	0	0	0	0	0	0	0	0	0	0	0	0	0	0	0	0	0	0	0	0	0		NA	NA	NA	NA	NA	NA	NA	NA	NA	NA	NA	NA	NA	NA	NA	NA	NA	NA	NA	NA	NA	NA		NA	NA	NA
O15381	NA	NA	NA	NA	NA	NA	NA	NA	NA	NA	NA	NA	NA	NA	NA	NA	NA	NA	NA	NA	0	0		NA	NA	NA	NA	NA	NA	NA	NA	NA	NA	NA	NA	NA	NA	NA	NA	NA	NA	NA	NA	NA	NA		NA	NA	NA
O15397	17807.7	25312.7	37260.9	48432.4	22397.3	28999.5	107258	69743.3	19051.7	87244.5	138603	173192	121656	58281.3	52715.5	199137	115502	82896.6	56602.6	99651.5	90539.1	149696		-1.55322	-1.61366	-1.07986	-0.601598	-2.19353	-1.17495	0.224561	0.0624741	-1.99309	0.0840635	0.739835	1.72619	1.86235	1.5074	1.25387	1.21184	0.413614	0.984868	0.990591	1.18727	-0.571185	-0.323973		0.362848	0.21579	0.325138
O15400	NA	NA	NA	NA	NA	NA	NA	NA	NA	NA	NA	NA	NA	NA	NA	NA	NA	NA	NA	NA	12507.2	2716.57		NA	NA	NA	NA	NA	NA	NA	NA	NA	NA	NA	NA	NA	NA	NA	NA	NA	NA	NA	NA	-0.0845418	-2.05299		NA	NA	NA
O15460	NA	NA	NA	NA	NA	NA	NA	NA	NA	NA	NA	NA	NA	NA	NA	NA	NA	NA	NA	NA	15144.8	11269.6		NA	NA	NA	NA	NA	NA	NA	NA	NA	NA	NA	NA	NA	NA	NA	NA	NA	NA	NA	NA	0.936522	-0.168334		NA	NA	NA
O15511	NA	NA	NA	NA	NA	NA	NA	NA	NA	NA	NA	NA	NA	NA	NA	NA	NA	NA	NA	NA	125995	45938.5		NA	NA	NA	NA	NA	NA	NA	NA	NA	NA	NA	NA	NA	NA	NA	NA	NA	NA	NA	NA	-0.0110226	-2.16367		NA	NA	NA
O15541	NA	NA	NA	NA	NA	NA	NA	NA	NA	NA	NA	NA	NA	NA	NA	NA	NA	NA	NA	NA	14733.9	35170.2		NA	NA	NA	NA	NA	NA	NA	NA	NA	NA	NA	NA	NA	NA	NA	NA	NA	NA	NA	NA	-1.37553	-0.622593		NA	NA	NA
O43143	396201	669775	539205	404824	623134	464632	823844	675269	510770	749108	918239	454153	159689	178797	146436	767456	844392	321328	232661	242817	1.22287e+06	1.18814e+06		0.0832847	0.133548	0.04096	-0.385241	0.0344645	-0.0556944	0.305578	0.37287	0.230653	0.371474	0.507361	0.289764	-0.783816	-0.431186	-0.56942	0.221949	0.384354	-0.246044	-0.140987	-0.6163	0.0453746	-0.311063		0.499688	0.499255	0.499842
O43150	0	0	0	0	0	0	0	0	0	0	0	0	0	0	0	0	0	0	0	0	0	0		NA	NA	NA	NA	NA	NA	NA	NA	NA	NA	NA	NA	NA	NA	NA	NA	NA	NA	NA	NA	NA	NA		NA	NA	NA
O43157	NA	NA	NA	NA	NA	NA	NA	NA	NA	NA	NA	NA	NA	NA	NA	NA	NA	NA	NA	NA	0	0		NA	NA	NA	NA	NA	NA	NA	NA	NA	NA	NA	NA	NA	NA	NA	NA	NA	NA	NA	NA	NA	NA		NA	NA	NA
O43169	57509.9	382086	286999	810402	417764	248296	388391	440631	28217.3	267359	562335	382125	392753	255612	167251	428070	490083	448137	167331	229687	NA	NA		-2.11823	0.112847	-0.145284	1.42382	0.169626	-0.216548	-0.0482663	0.534124	-3.44769	-0.447302	0.580493	0.763856	1.34143	0.972835	0.437774	0.125119	0.339728	1.05055	0.17661	0.0697829	NA	NA		0.193979	0.499255	0.499842
O43175	419758	479471	419877	527349	507149	437366	377470	435673	590614	464895	349608	315994	263566	178955	204734	399465	448765	234861	278281	428360	1.07134e+06	1.13541e+06		0.356334	-0.137874	-0.120835	0.215107	-0.0710772	0.0698161	-0.643273	-0.0564186	0.635494	-0.141243	-0.707058	-0.0478131	0.1752	-0.186373	0.154427	-0.537328	-0.346991	-0.492138	0.353001	0.441688	0.207568	-0.0268336		0.499688	0.499255	0.499842
O43181	28050.2	8036.01	20962	15325.2	17533.2	5144.85	17371.5	7861.08	10381.6	24472.1	18747.3	15734.3	22820.8	4301.82	9613.67	24147.3	20485.2	18281.1	30140.9	20649	NA	NA		1.13687	-1.33347	-0.0558967	-0.418251	-0.816814	-1.79505	-0.617657	-1.0926	-1.11226	0.0824976	-0.280574	0.0574706	1.43828	-0.096401	1.1244	-0.0621575	-0.312062	0.799597	2.41032	0.78542	NA	NA		0.499688	0.332252	0.499842
O43242	589357	376277	404329	320011	445709	243436	587480	418640	588754	310618	456651	195419	142732	64787.2	60287.4	780240	632683	253892	89496.5	327579	2.92432e+06	2.52397e+06		1.20941	-0.137698	0.178139	-0.173509	0.0890586	-0.444746	0.371173	0.243378	0.978223	-0.390091	0.0496499	-0.410871	-0.380861	-1.33237	-1.30457	0.815083	0.519464	-0.0178677	-0.974262	0.399126	1.16292	0.620995		0.499688	0.499255	0.499842
O43290	8248.16	40759.4	51254.6	31413.9	41251.6	31646.3	58020.2	39908.4	48676.1	64731	62515.7	87378.2	40115.9	35439.3	30986.3	45364	56608.4	34377.8	40845.9	35668	1.28789e+07	7.52189e+06		-2.24267	-0.407661	0.00539741	-0.669973	-0.600429	-0.533285	-0.134599	-0.29658	0.0235576	0.172327	0.0811729	1.25684	0.675591	0.933002	0.757204	-0.452771	-0.120506	0.0397635	0.880421	0.0690384	1.69893	0.546058		0.167227	0.499255	0.499842
O43291	895.866	3279.1	563.535	939.209	90705.7	125027	95021.1	608.665	91316.1	0	0	353011	0	0	7.185	0	296.481	465.544	156.955	552.716	NA	NA		-1.06197	-0.0651721	-1.63294	-2.33509	4.34148	5.73151	4.67588	-1.09457	4.62376	NA	NA	7.17796	NA	NA	-6.17134	NA	-4.21322	-2.25721	-2.78477	-2.41947	NA	NA		0.496409	0.499255	0.0949675
O43318	7.9745e+06	4.46605e+06	3.85451e+06	4.38691e+06	4.60847e+06	3.55464e+06	5.73821e+06	1.07003e+07	3.94204e+06	7.7072e+06	4.83338e+06	7.51524e+06	3.79275e+06	5.17836e+06	8.87882e+06	4.16504e+06	8.15863e+06	7.00151e+06	7.65908e+06	1.38375e+07	7.03488e+06	5.5541e+06		0.759445	-0.885448	-0.843079	-0.710393	-0.742998	-0.884261	-0.664886	0.620769	-0.261999	0.0675057	-0.940329	0.523793	-0.0133745	0.346184	1.51267	-1.05261	0.0169432	0.321402	1.09899	1.4619	0.574047	0.0644806		0.499688	0.477023	0.433996
O43324	187504	310545	295949	593902	277894	192484	280641	299256	553770	482217	508689	80430.7	189355	78280.1	45497.7	916384	624819	373820	43697.8	224762	711625	621813		-0.274074	-0.122987	-0.036473	1.00808	-0.381516	-0.52756	-0.467238	0.0160723	1.07322	0.493985	0.49151	-1.51048	0.300564	-0.721257	-1.43555	1.32195	0.760196	0.834933	-1.75536	0.100969	0.594599	0.0641643		0.499688	0.499255	0.499842
O43390	687620	771523	1.02078e+06	931987	877543	687147	924908	809534	966310	808307	993495	1.00978e+06	453076	416667	441286	1.01119e+06	996793	645436	512293	484048	1.22127e+06	1.31846e+06		0.174778	-0.46719	0.207045	0.0777633	-0.221872	-0.264786	-0.301358	-0.166043	0.444671	-0.270572	-0.186228	0.696827	-0.0200043	-0.0423934	0.242264	-0.147399	-0.136914	-0.0244592	0.210709	-0.374262	-0.210888	-0.384564		0.499688	0.499255	0.499842
O43396	16941.8	50783.2	30238.7	32677.7	59139.7	45359.2	108631	71125.9	19274.4	46218.4	152290	35716	26473	27816.1	19675.6	149485	145025	54262.5	25634.7	57415.9	525571	668000		-1.2505	-0.186883	-0.969284	-0.780169	-0.307523	-0.124119	0.649647	0.467952	-1.55953	-0.458534	1.2819	-0.227644	-0.0325766	0.698101	0.109575	1.19317	1.1595	0.711518	0.16499	0.728995	0.0860218	-0.0168389		0.445328	0.499255	0.372216
O43399	NA	NA	NA	NA	NA	NA	NA	NA	NA	NA	NA	NA	NA	NA	NA	NA	NA	NA	NA	NA	21453.2	25848.8		NA	NA	NA	NA	NA	NA	NA	NA	NA	NA	NA	NA	NA	NA	NA	NA	NA	NA	NA	NA	-0.131219	-0.46735		NA	NA	NA
O43402	0	0	0	0	0	0	0	0	0	0	0	0	0	0	0	0	0	0	0	0	NA	NA		NA	NA	NA	NA	NA	NA	NA	NA	NA	NA	NA	NA	NA	NA	NA	NA	NA	NA	NA	NA	NA	NA		NA	NA	NA
O43432	112556	57100.2	64321.2	58182.9	63509.5	40839.2	42803.5	77403.6	41199	43017.8	55833	80301.4	31255.5	19894.3	25954.6	48185.2	57863.6	48884.9	37657.1	41850	21281.2	34396.8		1.49459	-0.126411	-0.0444142	-0.0641714	-0.4425	-0.377284	-0.897889	0.514702	-0.612244	-0.715259	-0.356798	0.848888	0.14572	0.338101	0.603254	-0.662765	-0.381247	0.524526	0.732966	0.199223	-1.60742	-1.44525		0.452434	0.499255	0.499842
O43488	0	0	0	0	0	2664.32	0	8554.02	0	0	0	0	0	0	0	20166.8	34962.3	0	0	0	13816.1	29138.6		NA	NA	NA	NA	NA	-0.476304	NA	1.43189	NA	NA	NA	NA	NA	NA	NA	0.968041	1.79179	NA	NA	NA	-1.12028	-0.585481		NA	NA	NA
O43491	36260	84591.2	72530.4	43809.6	60883.4	61571.9	162081	112628	66819.1	130207	269429	38066.8	84060.8	118526	50201.8	208835	70715.2	107376	33616.4	105488	182102	217227		-1.04663	-0.337559	-0.534942	-1.21921	-1.1013	-0.575174	0.356153	0.228789	-0.575333	0.184617	1.23147	-1.02385	0.76049	1.81016	0.514342	0.793741	-0.809311	0.763209	-0.38963	0.684492	-0.895133	-1.03129		0.498956	0.499255	0.499842
O43504	67723.8	176568	110842	207420	71093.3	67213.9	142672	174259	80181.8	126920	106550	40691.2	68896.4	30327	22171.8	89469.9	67968	60457.9	32104.3	51451.8	NA	NA		-0.0631565	0.812718	0.109154	1.1269	-0.893558	-0.411987	0.196068	0.942853	-0.301641	0.183069	-0.113608	-0.910522	0.524707	-0.0780874	-0.608748	-0.439127	-0.843193	-0.00847158	-0.383442	-0.319063	NA	NA		0.499688	0.497436	0.499842
O43505	20770.7	0	666.298	26853.3	1080.1	0	8461.16	0	17876.1	1419.27	0	2296.87	0	0	0	0	1593.92	0	0	0	17999.7	105822		1.88962	NA	-2.69924	1.74676	-2.52982	NA	0.808078	NA	1.07592	-1.72801	NA	-1.49162	NA	NA	NA	NA	-1.73679	NA	NA	NA	0.651889	2.73929		0.365192	NA	0.00153398
O43567	9.59864e+08	2128176860	1.20852e+09	1.0792e+09	1113174893	1398581036	1.7318e+09	1619000181	4.29911e+08	1.17098e+09	1568785034	9.97746e+08	1.12621e+09	1734904537	1.01536e+09	1.52186e+09	1.34195e+09	1.8536e+09	1185565695	1.1529e+09	5.35287e+08	4.03416e+08		-0.369718	0.670429	0.0637154	-0.169524	0.0452237	0.107509	0.0626575	0.23336	-0.660865	0.0482389	0.107491	-0.207645	0.0579466	0.3712	0.181549	0.400007	0.362013	0.512791	0.365961	-0.0448375	-0.633822	-0.917828		0.499688	0.499255	0.499842
O43583	18369.6	74835.4	63665.4	38563.1	82192.8	76107.2	106645	98068	54403.3	77591.8	131936	67593.8	38313.1	18850.7	30968.6	94747.5	95498.9	45093.9	39298.1	115452	541303	525920		-1.56448	-0.0312096	-0.252837	-0.931155	-0.187375	0.226096	0.215769	0.513948	-0.406894	-0.099734	0.655479	0.31183	0.0837278	-0.399652	0.305296	0.103691	0.125102	-0.0225617	0.344977	1.31778	0.0418238	-0.416942		0.361674	0.499255	0.499842
O43592	167619	39919.3	50924.3	68472.7	41743.1	49855.8	57838.6	36426.1	83825.2	31001	38404.5	17909.5	79592.5	10204.1	12495.3	56717.2	49479.4	26518.8	12819.3	54038.3	NA	NA		2.44815	-0.336653	-0.0806421	0.503827	-0.772227	0.248113	-0.136809	-0.27943	0.763723	-0.897903	-0.599971	-1.08265	1.89078	-0.300617	-0.128923	-0.105518	-0.305816	-0.0528684	-0.529728	0.914569	NA	NA		0.238072	0.499255	0.499842
O43615	NA	NA	NA	NA	NA	NA	NA	NA	NA	NA	NA	NA	NA	NA	NA	NA	NA	NA	NA	NA	48748.6	15224.5		NA	NA	NA	NA	NA	NA	NA	NA	NA	NA	NA	NA	NA	NA	NA	NA	NA	NA	NA	NA	4.24688	1.75388		NA	NA	NA
O43660	24439.6	128248	55353.4	51253.7	94692.8	92610.3	76474.9	96739.3	77869.6	106212	137797	83707.3	6378.19	30439.3	22758.5	131459	123725	28312.2	19436.1	60623.3	NA	NA		-1.12503	0.786327	-0.52656	-0.553776	-0.0806127	0.532831	-0.310971	0.531548	0.0706316	0.353451	0.714877	0.623096	-2.58607	0.529415	-0.0162182	0.574638	0.494442	-0.646321	-0.629107	0.425907	NA	NA		0.489632	0.499255	0.499842
O43663	231379	127560	69703.7	99349.6	76272.6	199839	285053	168406	154091	164063	278924	85929	50169.2	67679.9	41022.7	120550	83865.1	77038	24135.5	38042.7	0	0		1.45	-0.00447	-0.884998	-0.283175	-1.05975	0.910328	0.929432	0.556543	0.392369	0.251729	1.01818	-0.093405	-0.290615	0.708076	-0.064196	-0.307487	-0.847544	-0.0105009	-1.17602	-1.12864	NA	NA		0.467102	0.499255	0.409845
O43670	NA	NA	NA	NA	NA	NA	NA	NA	NA	NA	NA	NA	NA	NA	NA	NA	NA	NA	NA	NA	14250.3	9156.81		NA	NA	NA	NA	NA	NA	NA	NA	NA	NA	NA	NA	NA	NA	NA	NA	NA	NA	NA	NA	-0.928926	-2.27365		NA	NA	NA
O43681	NA	NA	NA	NA	NA	NA	NA	NA	NA	NA	NA	NA	NA	NA	NA	NA	NA	NA	NA	NA	0	19617.2		NA	NA	NA	NA	NA	NA	NA	NA	NA	NA	NA	NA	NA	NA	NA	NA	NA	NA	NA	NA	NA	0.777138		NA	NA	NA
O43684	467828	840443	803049	664259	1.33289e+06	976845	960082	893567	611924	623729	1.04728e+06	672382	641617	489881	881632	871756	931191	671975	613384	651919	683687	884124		-0.482446	-0.39198	-0.212723	-0.489289	0.331389	0.198878	-0.311117	-0.0718279	-0.31929	-0.729097	-0.157798	0.0319553	0.437115	0.175149	1.23203	-0.433052	-0.308923	-0.0102225	0.431521	0.00559113	-0.0282105	0.0546128		0.499688	0.499255	0.499842
O43707	6.0749e+06	8.11087e+06	9.49025e+06	1.16209e+07	8.92747e+06	1.17362e+07	1.30119e+07	6.7131e+06	7.54768e+06	8.16544e+06	8.10747e+06	3.38755e+06	5.28185e+06	5.39655e+06	5.34815e+06	5.4699e+06	6.4396e+06	5.88842e+06	6.29538e+06	5.35941e+06	4.84442e+07	2.65765e+07		-0.0296387	-0.319548	0.167747	0.394715	-0.0690458	0.548371	0.202885	-0.40971	0.444287	-0.171987	-0.515095	-1.04967	0.0703995	-0.0559859	0.36276	-0.976493	-0.655089	-0.335011	0.416339	-0.343854	1.59626	0.604286		0.5	0.499255	0.499842
O43716	NA	NA	NA	NA	NA	NA	NA	NA	NA	NA	NA	NA	NA	NA	NA	NA	NA	NA	NA	NA	0	0		NA	NA	NA	NA	NA	NA	NA	NA	NA	NA	NA	NA	NA	NA	NA	NA	NA	NA	NA	NA	NA	NA		NA	NA	NA
O43719	17241.5	64485.5	35070.4	33175.5	66710.3	29974.1	42956.6	27662.6	14803.4	26162.7	34456.1	17857.4	6290.36	3494.4	4551.78	29131.5	42721.3	7797.55	1760.55	6045.29	264008	364799		0.406964	1.73846	0.680833	0.76614	1.23179	0.837219	0.736033	0.681441	-0.520279	0.184489	0.583501	0.255049	-0.535413	-0.482956	-0.184217	0.223222	0.7903	-0.505501	-2.05096	-1.01632	0.279962	0.159813		0.499688	0.187043	0.485102
O43747	NA	NA	NA	NA	NA	NA	NA	NA	NA	NA	NA	NA	NA	NA	NA	NA	NA	NA	NA	NA	0	2293.04		NA	NA	NA	NA	NA	NA	NA	NA	NA	NA	NA	NA	NA	NA	NA	NA	NA	NA	NA	NA	NA	-0.252953		NA	NA	NA
O43760	28225.4	27454.5	28395	33303.1	48929.4	47521.9	29198.9	29603.4	58820.7	39442	42006.1	167367	20010	83190.3	18513.3	30203.9	25660.1	40940.8	15996.7	16455.8	58527.2	21895.2		-0.250937	-0.924259	-1.03489	-0.626991	-0.64094	0.125261	-1.2424	-0.604685	0.122694	-0.606913	-0.517628	2.18239	-0.203228	2.84453	0.532505	-1.12609	-1.37158	0.56835	-0.138015	-0.927842	1.72744	-0.343326		0.499688	0.459435	0.348069
O43765	53908.8	48205.2	27840	48453	71687.7	28079.2	47190.4	36105.6	27045.2	20418	53260.5	22546.7	5996.42	6131.48	12610.5	34858.7	37183.8	14193.7	907.067	2755.84	261221	184174		1.9031	1.10609	0.140767	1.13168	1.14427	0.541771	0.67968	0.876858	0.181322	-0.381401	1.03305	0.405007	-0.806959	0.151886	1.12604	0.293456	0.387219	0.186305	-3.24264	-2.38239	0.596648	-0.522037		0.362848	0.427391	0.499842
O43768	10745.4	234270	109525	145517	174604	71359.9	80809.9	79597.1	97708.7	98442.9	83757.3	32941.9	6037.29	4555.82	6982.07	64754.9	82938.1	9464.82	10513.2	12652.4	NA	NA		-1.56213	2.46069	1.18973	1.76536	1.49612	0.916722	0.484336	1.03098	1.10899	0.96383	0.698554	-0.0439029	-1.86588	-1.36615	-0.850576	0.211816	0.587707	-0.427074	-0.681209	-1.15001	NA	NA		0.361674	0.0319345	0.195926
O43776	33353.9	147089	142996	97935.8	189711	131301	169448	142940	100839	125508	164721	42677.1	24137.7	21480.3	32291.8	197142	196301	42540.9	34869	48201.8	192120	167924		-1.15321	0.489602	0.446915	-0.0449798	0.539022	0.550607	0.410392	0.5961	0.0064308	0.125864	0.496243	-0.865143	-1.0808	-0.62728	-0.0805602	0.703386	0.708192	-0.568967	-0.295653	-0.447788	0.299204	-0.344766		0.480299	0.499255	0.499842
O43790	560.677	476.079	2451.83	328.882	1284.48	246.306	1227.45	0	0	77.6985	1517.5	6.64075	0	155.266	0	579.149	450.282	0	0	74336.5	27090	2701.27		0.134249	0.328333	1.96119	-0.692843	0.143702	-0.436564	0.376242	NA	NA	-2.52895	1.01552	-7.24341	NA	0.894412	NA	0.382559	-1.26558	NA	NA	8.09733	1.75822	-2.25536		0.499688	0.499255	0.0157561
O43795	NA	NA	NA	NA	NA	NA	NA	NA	NA	NA	NA	NA	NA	NA	NA	NA	NA	NA	NA	NA	4.87608e+06	403565		NA	NA	NA	NA	NA	NA	NA	NA	NA	NA	NA	NA	NA	NA	NA	NA	NA	NA	NA	NA	2.91733	-1.42635		NA	NA	NA
O43815	438350	408287	122850	818587	108599	159551	111460	293160	47374	1.22597e+06	12440.1	887370	43945.4	13621.4	39610.9	15025.7	43425	34488.5	191890	87958.9	0	2601.99		2.29206	1.59157	-0.262861	2.67144	-0.814793	0.429105	-0.669454	1.27376	-1.59827	3.08307	-3.80858	3.23015	-0.584189	-0.508705	-0.0675777	-3.59953	-2.00198	-1.24582	1.90016	0.0761423	NA	-0.908622		0.271416	0.23282	0.499842
O43819	127771	38215.6	71553.8	37668.6	51897.3	30464.2	74104.7	55302.7	135509	43635.5	51100.9	36748.3	42836.9	25070	10538.8	90205.7	60886	30321.3	24410	26713.2	34089.7	87228.6		1.75873	-0.656798	0.162367	-0.648012	-0.700336	-0.74619	-0.0295707	0.0855427	1.20786	-0.639083	-0.429028	-0.257325	0.689065	0.785819	-0.631603	0.322343	-0.257023	-0.109789	0.180844	-0.40304	-0.481993	0.348202		0.386531	0.499255	0.499842
O43823	0.457834	0	0	1041.94	0	0	2641.58	2908.52	0	900.122	69.0351	2536.96	2559.11	0	0	108.202	3178.1	1387.75	0	9369.15	26688	128888		-10.9564	NA	NA	0.372266	NA	NA	0.657955	2.70635	NA	0.28975	-3.46268	1.1238	2.02737	NA	NA	-3.00342	1.91838	1.91224	NA	3.35301	0.211715	1.99081		9.69e-23	NA	NA
O43837	15613.1	23734	47937.5	29226.6	53811	22096.4	21142	18717.8	44946.1	19128.1	42293.8	11765.1	26379.8	16539.5	13972.4	45296.1	44220.7	23149.4	16590.4	26401.8	NA	NA		-0.423466	-0.424165	0.468207	-0.109238	0.213787	-0.298787	-1.01946	-0.567409	0.438383	-0.979866	0.216817	-1.06956	0.939974	1.19022	0.860788	0.197935	0.15558	0.448274	0.659586	0.496581	NA	NA		0.499688	0.499255	0.499842
O43847	5476.66	16378	13865.8	9012.93	12844.3	7966.64	18801.3	10017.7	13666.4	8479.47	18759.2	35698.2	18884.4	4989.05	8932.37	17128.3	16110	12002.6	10832	11673.8	NA	NA		-0.985851	0.141263	-0.266227	-0.861142	-0.896337	-0.741875	-0.0975329	-0.284928	-0.323665	-1.12806	0.136938	1.66913	1.52532	0.546108	1.45331	-0.18104	-0.29253	0.54123	1.31956	0.281102	NA	NA		0.499688	0.499255	0.499842
O43852	154405	452339	300319	423504	390721	211004	310400	262138	255716	291026	442663	176337	108371	86062	85431.2	344287	397418	194236	100093	152796	1.3033e+06	2.18551e+06		-0.395749	0.569806	0.143491	0.654672	0.291099	-0.240411	-0.164245	-0.0313287	0.112585	-0.0919599	0.428638	-0.171493	-0.376149	-0.460123	-0.357962	0.0142352	0.240231	0.00494909	-0.379504	-0.321525	0.152957	0.594219		0.499688	0.499255	0.499842
O43865	10985.9	26243.4	21824	15412.6	39582.6	21254.6	25299.4	19190.6	28002.3	18295.9	8191.07	13369	5885.14	1987.62	3578.61	6386.14	6935.16	2685.14	2267.43	2813.31	NA	NA		0.221965	1.04329	0.6161	0.117671	0.991193	0.928253	0.543113	0.905358	0.937081	0.218539	-0.911587	0.365089	-0.0592524	-0.644075	0.278824	-1.47461	-1.38298	-1.54093	-0.828895	-1.6963	NA	NA		0.499688	0.43458	0.499842
O60237	NA	NA	NA	NA	NA	NA	NA	NA	NA	NA	NA	NA	NA	NA	NA	NA	NA	NA	NA	NA	230607	12003.5		NA	NA	NA	NA	NA	NA	NA	NA	NA	NA	NA	NA	NA	NA	NA	NA	NA	NA	NA	NA	4.246	-1.12478		NA	NA	NA
O60256	2583.08	79786.7	99386.4	101100	190075	88789.3	117413	167900	163269	145364	78097.8	51947.2	26808	35320.2	29906.4	86905.6	163803	11083.5	31728	8307.68	5661.62	19621.7		-4.17793	0.295046	0.473093	0.665141	1.03393	0.693755	0.474844	1.60284	1.29514	0.97795	0.0417163	0.0858559	-0.139611	1.1965	0.85054	0.0916522	1.03235	-1.74242	0.485708	-2.30157	-1.50514	-0.254856		0.00161904	0.499255	0.499842
O60264	117881	174049	116835	233776	282165	148523	156967	145969	185948	674758	124587	125205	128768	204860	154453	119234	106848	161320	104929	190264	NA	NA		-0.427362	-0.402808	-0.888204	0.187735	0.171612	-0.362096	-0.788693	-0.502916	-0.0594786	1.55653	-1.04635	-0.324298	0.284007	1.35177	0.982971	-1.16515	-1.32864	0.169696	0.124442	0.421803	NA	NA		0.499688	0.499255	0.408647
O60271	13939.1	18575.9	10789.5	8049.97	18359.2	11698	9596.62	9964.73	42817.8	11545.2	5586.46	15310.5	3631.25	275.364	13165.2	2091.13	30229.1	912.166	7952.9	4848.73	NA	NA		0.819403	0.818133	-0.131915	-0.59919	0.132503	0.327736	-0.617965	0.241192	1.85502	-0.180861	-1.17189	0.845705	-0.514403	-3.32104	2.55597	-2.85314	1.1193	-2.89585	1.38619	-0.612504	NA	NA		0.499688	0.497436	0.499842
O60282	5113.57	76857.7	29368	19166.2	43405.5	25144.6	32466.2	37026.9	10807	101701	28507.4	18298.8	27551.7	48909	14210.6	40949.4	20837.9	39074.6	45855.4	20309.5	NA	NA		-2.24193	1.21228	-0.399002	-0.8748	-0.228846	-0.234739	-0.497978	0.319849	-1.83108	1.41321	-0.510716	-0.53012	0.86803	2.68663	0.730181	-0.0804902	-1.10559	1.10339	2.03679	-0.0253539	NA	NA		0.167227	0.390407	0.499842
O60292	0	0	0	0	0	0	0	0	0	0	0	0	0	0	0	0	0	0	0	0	114542	29937		NA	NA	NA	NA	NA	NA	NA	NA	NA	NA	NA	NA	NA	NA	NA	NA	NA	NA	NA	NA	2.30791	-0.47968		NA	NA	NA
O60337	244233	453215	474826	624959	449599	216101	307404	1.88889e+07	321869	389963	222942	162261	195729	181732	333241	262503	208167	197227	135527	193099	NA	NA		-0.311494	-0.0544888	0.220611	0.631584	-0.101946	-0.830364	-0.80125	5.79433	-0.130149	-0.258757	-1.22854	-0.903358	-0.110313	0.0150475	1.05983	-1.01713	-1.35157	-0.597457	-0.558001	-0.593127	NA	NA		0.499688	0.499255	0.499842
O60488	4947.9	1906.06	1628.61	6284.52	3426.07	6632.63	4470.23	2550.45	6956.25	5273.89	7282.97	4814.61	1993.16	1533.79	842.247	98901.9	8372.72	3207.88	1794	3715.04	NA	NA		0.116089	-1.43322	-1.67743	0.0723916	-1.20599	0.678746	-0.566685	-0.543018	0.186374	-0.118032	0.49348	0.153272	-0.319892	0.470215	-0.446857	4.20752	0.333687	0.132685	0.371364	0.0201878	NA	NA		0.499688	0.286563	0.0851009
O60506	772646	1.7909e+06	1.27905e+06	1.4742e+06	1.34838e+06	1.27214e+06	1.74267e+06	1.59017e+06	930783	1.31117e+06	1.90468e+06	1.24031e+06	906361	980333	738923	1.8224e+06	1.66948e+06	993404	1.01162e+06	975274	1.8012e+06	2.31798e+06		-0.308446	0.0876943	-0.139692	0.0680064	-0.259455	-0.0378012	-0.0414332	0.141623	-0.249186	-0.224536	0.0713053	0.305237	0.320043	0.470205	0.279093	0.0501825	-0.0376085	-0.107647	0.51738	-0.0183439	0.0958727	0.207915		0.499688	0.499255	0.499842
O60518	0	0	0	0	0	0	0	0	0	0	0	0	0	0	0	0	0	0	0	0	0	0		NA	NA	NA	NA	NA	NA	NA	NA	NA	NA	NA	NA	NA	NA	NA	NA	NA	NA	NA	NA	NA	NA		NA	NA	NA
O60610	6516.93	12301.4	7212.42	7729.97	22182.6	15739.7	11961.2	7706.05	11153.3	4465.03	9876.84	4975.13	206.037	1985.09	98.4865	6782.01	7808.16	685.907	4124.2	3249.59	1533.76	10874.5		0.448991	1.22739	0.412855	0.274348	1.46646	1.82516	0.7717	0.963591	0.777738	-0.501418	0.798091	0.0998394	-3.80776	0.706206	-3.76481	0.024074	0.102096	-2.29154	1.46071	-0.282072	-2.5296	-0.211869		0.499688	0.382356	0.499842
O60637	0	0	0	0	0	0	0	0	0	0	0	0	0	0	0	0	0	0	0	0	0	0		NA	NA	NA	NA	NA	NA	NA	NA	NA	NA	NA	NA	NA	NA	NA	NA	NA	NA	NA	NA	NA	NA		NA	NA	NA
O60674	NA	NA	NA	NA	NA	NA	NA	NA	NA	NA	NA	NA	NA	NA	NA	NA	NA	NA	NA	NA	0	0		NA	NA	NA	NA	NA	NA	NA	NA	NA	NA	NA	NA	NA	NA	NA	NA	NA	NA	NA	NA	NA	NA		NA	NA	NA
O60701	NA	NA	NA	NA	NA	NA	NA	NA	NA	NA	NA	NA	NA	NA	NA	NA	NA	NA	NA	NA	49309.9	33204.8		NA	NA	NA	NA	NA	NA	NA	NA	NA	NA	NA	NA	NA	NA	NA	NA	NA	NA	NA	NA	2.1564	0.890731		NA	NA	NA
O60716	NA	NA	NA	NA	NA	NA	NA	NA	NA	NA	NA	NA	NA	NA	NA	NA	NA	NA	NA	NA	0	5336.4		NA	NA	NA	NA	NA	NA	NA	NA	NA	NA	NA	NA	NA	NA	NA	NA	NA	NA	NA	NA	NA	0.693068		NA	NA	NA
O60749	NA	NA	NA	NA	NA	NA	NA	NA	NA	NA	NA	NA	NA	NA	NA	NA	NA	NA	NA	NA	30104	66213		NA	NA	NA	NA	NA	NA	NA	NA	NA	NA	NA	NA	NA	NA	NA	NA	NA	NA	NA	NA	-0.950308	-0.327466		NA	NA	NA
O60763	2352.41	448.002	5945.66	8088.45	21870.1	13310.2	12886.3	18424.4	13327.9	8326.15	33763.9	9598.44	11487.1	3096.96	2368.48	41396.1	43480.4	13629.1	3963.13	5162.46	64456.8	107499		-1.8088	-3.79274	-1.13107	-0.597376	0.310359	0.427671	-0.263872	1.00258	0.0522407	-0.740512	1.39597	0.101847	1.17036	0.208164	-0.167767	1.52743	1.59224	1.12394	0.17764	-0.523675	0.170748	0.330727		0.280103	6.76e-05	0.295925
O60784	NA	NA	NA	NA	NA	NA	NA	NA	NA	NA	NA	NA	NA	NA	NA	NA	NA	NA	NA	NA	566416	103883		NA	NA	NA	NA	NA	NA	NA	NA	NA	NA	NA	NA	NA	NA	NA	NA	NA	NA	NA	NA	4.59152	1.23291		NA	NA	NA
O60825	461704	748883	692631	569213	520731	611312	683163	820260	507041	598404	994962	529420	357588	504965	383439	833022	636072	478617	364313	349550	708116	834000		-0.0561682	-0.0818165	0.0371985	-0.252841	-0.605337	-0.0254004	-0.349229	0.281562	-0.148917	-0.333789	0.24634	0.14397	0.0385549	0.724664	0.480642	-0.0323055	-0.412197	-0.0333696	0.143291	-0.451279	-0.216283	-0.283165		0.499688	0.499255	0.499842
O60828	0	66287.2	19912.6	20397.9	38164.2	18097.4	50621.5	19862.1	19126.5	31439.5	106487	16871.5	0	0	0	74256.6	175932	11268.8	3500.43	3332.25	48912.5	37002		NA	1.38218	-0.581037	-0.402804	-0.0705998	-0.339516	0.544774	-0.172504	-0.607286	0.0214215	1.86449	-0.264109	NA	NA	NA	1.17819	2.47212	-0.370769	-1.32614	-1.32863	0.882812	-0.143804		NA	0.321754	0.499842
O60841	10263.1	74837.6	65335.5	95776.7	103701	56839.3	72459.6	61927.2	43905.1	61080	94700.2	33137.5	6790.27	5447.05	7830.22	70967.7	100595	11716.6	7794.63	13708.5	98640.4	162062		-1.37297	0.971309	0.673664	1.37257	0.981659	0.809868	0.58019	0.878206	0.177223	0.501301	1.12433	0.227054	-1.43021	-0.89273	-0.483293	0.608139	1.13632	-0.905115	-0.914501	-0.765981	-0.909747	-0.723636		0.402786	0.446786	0.48783
O60858	189580	827182	425592	445941	436266	450465	701966	578669	297372	334138	723890	477132	279825	401184	279208	580814	629526	504825	6.76774e+07	251809	169264	207346		-1.29763	0.279763	-0.539157	-0.46591	-0.750489	-0.309193	-0.148899	-0.0495522	-0.880902	-1.0922	-0.0331539	0.100502	-0.163422	0.649105	0.212266	-0.404138	-0.274138	0.231498	8.12272	-0.776529	0.41453	0.38707		0.431602	0.499255	0.499842
O60869	44893.5	195716	80158.6	119249	133320	82706.9	119755	137414	97123.4	138999	135186	48637.9	35951.5	30077.3	36767.1	124014	123208	93139.4	44706.6	48986.5	114162	111109		-0.671648	0.94925	-0.389946	0.274733	0.0307037	-0.101445	-0.0763594	0.576726	-0.0245516	0.308601	0.233611	-0.639248	-0.448249	-0.0564811	0.168854	0.0441963	0.0458937	0.644347	0.121494	-0.378202	-0.180482	-0.680522		0.499688	0.450725	0.499842
O60884	1.26657e+06	526953	1.12393e+06	367293	946844	871100	1.51167e+06	492994	560152	965044	629779	1.10571e+06	672097	448157	273006	967837	1.0629e+06	756752	354717	1.81359e+06	1.063e+06	1.89444e+06		1.15925	-0.936489	0.44078	-1.21693	-0.0222254	0.180813	0.518207	-0.806345	-0.291477	0.0767009	-0.764612	0.924976	0.658907	0.184963	-0.364931	-0.123641	0.0434376	0.315469	-0.234644	1.68098	0.0208057	0.584263		0.499688	0.457506	0.499842
O60888	45282.4	139112	180086	231170	378154	123055	195450	178326	228022	150425	223221	61463.3	32515	29381.3	55948.1	205425	270978	112087	16432.1	93614.3	192747	497073		-1.22446	-0.0973708	0.372527	0.789645	1.19961	-0.0222751	0.163425	0.418799	0.825955	-0.0835192	0.460926	-0.772134	-1.14981	-0.887464	0.106037	0.281839	0.695707	0.270658	-1.99859	-0.0127504	-1.53693	-0.471184		0.452434	0.499255	0.499842
O60906	28956.6	0	0	0	0	0	28366.1	0	0	0	0	0	0	0	0	0	0	0	0	20.9917	NA	NA		4.68873	NA	NA	NA	NA	NA	4.15463	NA	NA	NA	NA	NA	NA	NA	NA	NA	NA	NA	NA	-8.84335	NA	NA		0.00574578	NA	NA
O75083	8542.58	15997.6	12381.5	5602.37	15917.5	6625.69	7628.7	14236.2	7521.6	13504.1	33733.5	3361.86	5786.17	4944.35	4508.84	14866.4	15251	12629.1	529.132	4382.86	69364.3	118998		0.368463	0.754318	0.21926	-0.885085	0.0965509	-0.351289	-0.78492	0.878026	-0.540129	0.23781	1.65362	-1.20022	0.408865	1.16319	1.04915	0.262718	0.292351	1.26934	-2.55891	-0.508573	-0.308241	-0.106218		0.499688	0.499255	0.499842
O75122	0.145205	3814.1	3506.83	300.218	1037.84	2077.38	9729.63	2.54148	79.9666	10446.2	25154.4	18201.9	13067.6	400.564	5143.72	4293.62	261.495	634.425	1215.24	1159.63	NA	NA		-13.4455	1.41088	1.52258	-2.94191	-1.20439	0.709618	2.49581	-8.04445	-3.88383	2.7981	4.25677	3.58683	4.16821	1.33504	3.8729	1.35474	-3.11886	-0.517011	1.59174	-0.270063	NA	NA		3.71e-34	0.308648	0.0810414
O75131	4220.62	26552.1	25920.3	28929.7	49047.3	19122.2	29092.5	26344.6	38851.4	19793.6	36299.6	10803.4	2214.56	543.808	3788.13	42366.1	20217.5	29593.4	2554.3	4301.94	47304.2	64999.1		-1.38412	0.733725	0.529499	0.842182	1.02502	0.46382	0.438101	0.95961	1.1717	0.0533603	0.972297	-0.207683	-1.76899	-1.89174	-0.0559679	1.06004	-0.0380221	1.7873	-1.08564	-1.2502	-1.09905	-1.23665		0.401491	0.499255	0.499842
O75150	NA	NA	NA	NA	NA	NA	NA	NA	NA	NA	NA	NA	NA	NA	NA	NA	NA	NA	NA	NA	1374.46	1236.79		NA	NA	NA	NA	NA	NA	NA	NA	NA	NA	NA	NA	NA	NA	NA	NA	NA	NA	NA	NA	-1.58664	-1.22338		NA	NA	NA
O75165	806.71	2423.17	1576.27	1577.89	3698.25	3358.08	1924.25	4812.84	11278	0	551.772	146520	920.564	3.44877	403.386	1549.65	5679.7	5678.77	244.615	2818.49	NA	NA		-1.90451	0.0519986	-0.455225	-1.02867	0.0312898	0.770096	-0.664191	1.59377	1.92692	NA	-2.21949	6.2201	-0.451991	-6.54736	-0.558786	-0.887497	0.858883	2.12061	-1.50643	0.52912	NA	NA		0.256458	0.499255	0.499842
O75190	112691	41306.3	60716.5	34525.1	63543.5	58130.3	58859.5	32168.7	50943.4	48906.9	41720.8	79267	27634.8	8192.2	9273.86	28493.2	40030.8	17439.9	18512.1	190891	216883	337251		1.8259	-0.265431	0.237898	-0.493122	-0.0644059	0.486379	-0.0639315	-0.456756	0.068029	-0.168647	-0.437603	1.18008	0.292921	-0.705177	-0.644193	-1.08121	-0.563976	-0.68611	-0.0156329	2.79301	0.247651	0.374774		0.372427	0.499255	0.499842
O75223	NA	NA	NA	NA	NA	NA	NA	NA	NA	NA	NA	NA	NA	NA	NA	NA	NA	NA	NA	NA	33562	114815		NA	NA	NA	NA	NA	NA	NA	NA	NA	NA	NA	NA	NA	NA	NA	NA	NA	NA	NA	NA	-1.44374	-0.0686556		NA	NA	NA
O75306	291110	508661	190257	318858	528440	241917	130786	46156.8	405.103	6142.14	3792.67	79224.4	0	0	0	10537.8	13876	0	0	267.267	NA	NA		3.5377	3.75258	2.1208	3.06461	3.28566	2.86779	1.29475	0.274373	-7.21352	-3.20837	-2.90805	1.36791	NA	NA	NA	-2.5043	-2.07859	NA	NA	-5.95245	NA	NA		0.0594873	0.000159153	0.00718538
O75340	14647.2	36453.8	53186.5	42812.7	83035.5	40029.7	62140.3	40862.4	43814.5	41499.4	60943.1	10746.5	3038.06	1585.96	2090.39	35278	46681.9	12087.8	3743.23	2751.76	70855.4	99847.3		-0.0708877	0.653807	1.05366	0.901021	1.2976	1.02486	1.03496	1.03288	0.836687	0.622774	1.19149	-0.748262	-1.85099	-1.89016	-1.55099	0.258676	0.672879	-0.0906793	-1.13722	-2.4352	-0.52848	-0.626827		0.499688	0.499255	0.278582
O75347	NA	NA	NA	NA	NA	NA	NA	NA	NA	NA	NA	NA	NA	NA	NA	NA	NA	NA	NA	NA	46684.9	127006		NA	NA	NA	NA	NA	NA	NA	NA	NA	NA	NA	NA	NA	NA	NA	NA	NA	NA	NA	NA	-0.864395	0.13918		NA	NA	NA
O75369	234139	284985	297419	156697	280814	249966	321418	285608	340971	376651	373654	226141	158971	151358	116045	377376	349182	204910	155024	170703	1.33176e+06	1.03062e+06		0.0621616	-0.282247	-0.0335349	-0.987688	-0.362157	-0.151553	-0.275355	-0.0672008	0.380694	0.129942	0.0126317	0.0372823	0.0308293	0.214033	-0.0664359	-0.0125997	-0.115284	-0.0791073	0.10734	-0.319706	0.471042	-0.237895		0.499688	0.499255	0.499842
O75381	NA	NA	NA	NA	NA	NA	NA	NA	NA	NA	NA	NA	NA	NA	NA	NA	NA	NA	NA	NA	17217.1	60308.4		NA	NA	NA	NA	NA	NA	NA	NA	NA	NA	NA	NA	NA	NA	NA	NA	NA	NA	NA	NA	-1.26418	0.1019		NA	NA	NA
O75390	209365	733698	454177	427572	705726	345017	518510	486655	135617	426668	404777	322487	149510	156151	127746	961169	727167	358633	144043	289051	1.54766e+06	2.26231e+06		-0.377915	0.765914	0.279077	0.188479	0.710772	-0.00412389	0.110324	0.381771	-1.2538	0.0242489	-0.215328	0.272362	-0.38786	-0.131551	-0.275659	1.05039	0.654814	0.41309	-0.356898	0.13689	-0.544729	-0.295481		0.499688	0.499255	0.499842
O75396	NA	NA	NA	NA	NA	NA	NA	NA	NA	NA	NA	NA	NA	NA	NA	NA	NA	NA	NA	NA	0	13324		NA	NA	NA	NA	NA	NA	NA	NA	NA	NA	NA	NA	NA	NA	NA	NA	NA	NA	NA	NA	NA	-0.301686		NA	NA	NA
O75400	29984.3	47237.4	47968.3	39973.3	64114	46533.9	72773.9	39396.8	22596.2	64216.1	79039.1	59474.4	18998.4	17136.4	19329	76565	68231.1	27938.1	18591.7	24083.1	NA	NA		-0.14393	-0.079266	-0.167671	-0.304534	-0.121969	0.147627	0.212845	-0.157587	-1.21041	0.203743	0.492015	0.730901	-0.266263	0.48546	0.533366	0.350264	0.182	0.0294682	0.0350432	-0.300907	NA	NA		0.499688	0.499255	0.499842
O75431	5929.76	1130.79	306.605	679.475	187.96	0	891.2	766.78	1364	155.235	620.647	0	195.929	81.9253	141.602	608.566	0	0	356.953	46.7751	31148.7	491215		2.76375	1.37411	-0.125646	0.9648	-1.90655	NA	0.793648	1.37304	1.0414	-0.60431	0.565346	NA	0.568538	0.7918	1.09558	1.33079	NA	NA	2.56174	-2.49158	4.66164	8.31		0.171476	0.324055	0.499842
O75436	NA	NA	NA	NA	NA	NA	NA	NA	NA	NA	NA	NA	NA	NA	NA	NA	NA	NA	NA	NA	1220.3	11834.6		NA	NA	NA	NA	NA	NA	NA	NA	NA	NA	NA	NA	NA	NA	NA	NA	NA	NA	NA	NA	-3.06057	-1.13964		NA	NA	NA
O75439	11242.7	41300	31312.1	25328	60490.1	20634.6	49107.8	30138.7	16492.3	53232.8	43786.7	11226.5	6514.43	19522.5	8044.52	72162.1	57594.1	22816.4	5490	15017.1	51761.7	106465		-0.749703	0.559467	-0.0209782	-0.176133	0.517634	-0.250488	0.39031	0.316389	-0.922767	0.699655	0.418454	-0.976292	-0.994486	1.56867	0.212093	1.02762	0.693011	0.571272	-0.804481	-0.210173	0.489446	0.951177		0.499688	0.499255	0.499842
O75477	5.82437e+06	270466	229608	739851	189579	146194	1.41076e+06	172443	198169	3.09388e+06	170509	296286	313653	149422	3.84868e+06	4.12393e+07	1.38526e+06	242102	583298	264257	1.15753e+06	2.02557e+06		3.76116	-1.51999	-1.53988	0.199277	-2.05089	-2.08487	0.795608	-1.9635	-1.49786	2.16493	-2.30349	-0.659318	-0.0891347	-0.994709	3.98967	5.83905	0.809023	-0.973747	0.923147	-0.800207	1.03883	1.55416		0.0419678	0.248406	0.120783
O75489	6449.34	7071.27	34592.5	24363.2	51418.5	13221.8	25643.9	14024.1	72906.3	39889.1	9928.37	22456.8	8957.21	1570	3353.85	20420	21873.9	4703.32	6374.05	13082.9	0	0		-1.07686	-0.476946	0.703715	0.284498	0.809733	-0.367573	-0.0262834	-0.215164	1.83123	0.823221	-1.23522	0.597798	0.0314971	-0.56706	-0.459501	-0.311148	-0.209332	-1.24427	0.0716085	0.100634	NA	NA		0.496409	0.499255	0.467208
O75494	657.033	3136.05	2616.35	2253.25	14391.8	12952.2	9071.38	27514.1	11933.4	21289.5	16125.8	14550.1	3368.2	2359.03	6545.04	0	9993.68	0	0	930.944	NA	NA		-2.49	-1.53307	-1.9088	-2.22767	0.118399	0.839324	-0.356703	2.1591	0.249884	1.10274	1.8543	1.0973	-0.306127	1.32254	1.86256	NA	-0.219833	NA	NA	-2.81277	NA	NA		0.114385	0.245376	0.0418163
O75533	224388	1.2397e+06	898391	1.13517e+06	767299	1.02323e+06	1.52932e+06	1.3743e+06	616856	1.31687e+06	1.47988e+06	494646	531278	565120	313381	1.01539e+06	1.12139e+06	672302	382588	568019	3.33585e+06	1.7133e+06		-1.50491	0.224532	0.00326162	0.357399	-0.435335	0.313803	0.433078	0.607495	-0.236676	0.44188	0.392731	-0.378732	0.20309	0.396864	-0.280966	-0.154984	0.0246269	0.0222697	-0.237534	-0.150029	1.30715	0.0283476		0.367813	0.499255	0.499842
O75534	183194	242186	307640	171028	354468	267266	311900	275136	200146	252866	377969	223884	115810	185929	126182	384991	408740	228098	189621	172159	691614	773674		-0.181573	-0.367322	0.147959	-0.717766	0.107682	0.0871981	-0.183591	0.0175011	-0.312566	-0.339381	0.175714	0.139928	-0.304356	0.690601	0.207984	0.158031	0.255339	0.225982	0.55436	-0.169326	0.214547	0.0516748		0.499688	0.499255	0.499842
O75607	59463.3	51158.3	2562.82	30423	37230.1	12074.6	30403.1	12040.1	13729.4	33637.4	36250.9	3160.7	0	0	1202.57	29504.3	26131.4	1363.68	0	13150.6	383971	231091		2.41149	1.55482	-3.05297	0.802909	0.543458	-0.356129	0.392762	-0.40698	-0.457957	0.727858	0.823114	-1.12577	NA	NA	-1.00825	0.411024	0.229164	-1.91951	NA	0.306187	0.372186	-0.977625		0.24682	0.245376	0.000231103
O75629	NA	NA	NA	NA	NA	NA	NA	NA	NA	NA	NA	NA	NA	NA	NA	NA	NA	NA	NA	NA	22039.4	33945.7		NA	NA	NA	NA	NA	NA	NA	NA	NA	NA	NA	NA	NA	NA	NA	NA	NA	NA	NA	NA	-0.506587	-0.452714		NA	NA	NA
O75643	102912	107610	144241	92295.5	128207	89854.3	164196	104150	242027	144854	179451	111180	72068.2	74017.6	51943.2	199456	186674	163923	65682.7	86486.1	256820	408788		-0.196203	-0.671606	-0.157372	-0.771948	-0.612427	-0.686074	-0.29204	-0.576075	0.711083	-0.335191	-0.0573646	-0.088373	-0.159926	0.307841	-0.189784	0.0436844	-0.0526734	0.649499	-0.125432	-0.322466	-0.42111	-0.0769507		0.499688	0.499255	0.499842
O75683	NA	NA	NA	NA	NA	NA	NA	NA	NA	NA	NA	NA	NA	NA	NA	NA	NA	NA	NA	NA	0	0		NA	NA	NA	NA	NA	NA	NA	NA	NA	NA	NA	NA	NA	NA	NA	NA	NA	NA	NA	NA	NA	NA		NA	NA	NA
O75688	1.03322e+07	2.53903e+07	2.29876e+07	1.63115e+07	1.96106e+07	2.2425e+07	3.3034e+07	3.04988e+07	9.36664e+06	2.3221e+07	3.87937e+07	1.1969e+07	1.25911e+07	2.08712e+07	9.21929e+06	3.73561e+07	2.97243e+07	2.43988e+07	1.20255e+07	1.59182e+07	2.94579e+07	2.28527e+07		-0.630827	0.0708524	0.176541	-0.41643	-0.168909	0.171878	0.256786	0.505931	-0.460324	0.088886	0.496922	-0.553648	-0.0705519	0.44854	-0.252656	0.590304	0.346593	0.363393	-0.0354005	-0.117209	-0.0354714	-0.440801		0.499688	0.499255	0.499842
O75694	177908	152064	176784	76401.2	218419	149996	283991	151251	163279	210213	211486	102238	114022	42709.1	38403.6	271983	293540	137736	100089	174845	187979	867789		0.498658	-0.276775	0.0206411	-1.17515	0.0530683	-0.0456787	0.400902	-0.14202	-0.00197121	0.0972386	0.0666774	-0.336586	0.401993	-0.61979	-0.75289	0.384213	0.500368	0.275537	0.385023	0.605907	-0.428642	1.49545		0.499688	0.499255	0.499842
O75821	145936	632526	409759	350723	591841	364871	530683	434008	281619	524011	630202	269275	208522	156685	173857	634550	591349	263334	265734	268186	1.38407e+06	1.6028e+06		-1.04982	0.43076	0.00332215	-0.230807	0.321208	-0.0408427	0.02325	0.0953201	-0.300602	0.20026	0.32695	-0.123095	-0.0138772	-0.231581	0.0680196	0.310925	0.223736	-0.163925	0.440632	-0.0955826	0.0176456	-0.0833914		0.498538	0.499255	0.499842
O75822	NA	NA	NA	NA	NA	NA	NA	NA	NA	NA	NA	NA	NA	NA	NA	NA	NA	NA	NA	NA	124312	124159		NA	NA	NA	NA	NA	NA	NA	NA	NA	NA	NA	NA	NA	NA	NA	NA	NA	NA	NA	NA	0.145532	-0.408981		NA	NA	NA
O75844	26193.7	10885.1	31204.3	51753.2	44697.2	30164	269443	19099.1	20214.4	16948.4	13354.8	6809.61	24152.6	1207.88	5186.83	51487.7	39961.3	11725.8	5422.56	30224	4788.64	51625.8		0.638655	-1.25873	0.145131	1.01529	0.202655	0.469344	3.07862	-0.157314	-0.488031	-0.853991	-1.1759	-1.57225	1.11384	-1.35757	-0.215513	0.674081	0.299435	-0.264102	-0.580685	0.957702	-2.02678	0.905184		0.499688	0.358223	0.499842
O75874	0	0	0	0	0	0	0	0	0	0	0	0	0	0	0	0	0	0	0	0	2925.66	15472.3		NA	NA	NA	NA	NA	NA	NA	NA	NA	NA	NA	NA	NA	NA	NA	NA	NA	NA	NA	NA	-1.74328	0.295227		NA	NA	NA
O75882	9176.36	543.267	0	0	326.388	819.458	68849.3	0	1175.48	501.368	2158.48	2584.01	2581.47	7294.21	387.181	0	4508.47	0	746.293	5590.6	NA	NA		1.88679	-2.08359	NA	NA	-2.46843	-1.22987	4.94908	NA	-1.37072	-1.30499	-0.00481519	0.237796	1.25561	4.17162	0.56221	NA	0.662213	NA	0.3292	1.70331	NA	NA		0.365192	0.078233	NA
O75915	26368.3	27344.2	27132.8	23451.8	27527.8	15109.6	20019.8	15851.2	22750.6	29506.1	20739.2	184755	61333.4	1366.76	2163.62	24450.5	20500.8	12446.6	9572.11	41877.4	NA	NA		0.759286	0.196588	0.0100277	-0.0633778	-0.433063	-0.479327	-0.71502	-0.382443	-0.221157	0.0597357	-0.451268	3.47035	2.62028	-2.1566	-1.48486	-0.349128	-0.615851	-0.0872603	0.307093	1.56625	NA	NA		0.499688	0.499255	0.499842
O75937	15778.9	71114.4	43592.3	39767.4	96204.1	54221.8	86137.6	74704.4	31433.2	61084.3	75975.1	16504	6124.94	1630.81	2692.52	57047	69582	8996.48	9880.63	6988.85	39929.9	95723.8		-0.446458	1.16175	0.275065	0.309163	1.04108	0.993246	1.04062	1.44053	-0.134154	0.717034	1.03521	-0.591205	-1.29542	-2.33622	-1.6729	0.493497	0.785781	-1.0157	-0.19192	-1.52878	-0.538572	0.155263		0.499688	0.409579	0.499842
O75940	54101.7	41692.7	98944.9	121250	102049	76912.4	91554.6	92246.5	128576	78823.9	211747	133194	75584.7	33318.5	52734.4	120141	154951	117215	67732.5	80366.5	NA	NA		-0.686569	-1.63798	-0.308803	0.0658751	-0.576337	-0.478124	-0.73311	-0.297374	0.166372	-0.801906	0.654888	0.617679	0.381954	-0.292571	0.376299	-0.260706	0.131109	0.682426	0.439053	0.0566167	NA	NA		0.499688	0.208875	0.499842
O75952	60814.3	25514.4	91129	101781	48779.4	105617	476462	120675	103598	1.20362e+06	3.27501e+06	59627.1	60250.2	450353	15825.3	1.43052e+06	1.61898e+06	851098	44428.4	503929	NA	NA		-1.51414	-3.39413	-1.3497	-1.15782	-2.55923	-0.965464	0.796992	-0.879291	-1.01886	2.3419	3.79215	-1.52878	-0.950695	2.43582	-1.50503	2.49153	2.68085	2.58162	-1.26602	1.79943	NA	NA		0.365192	0.000615833	0.178526
O75955	2.77364e+06	3.15906e+06	2.07281e+06	2.6369e+06	1.87266e+06	1.83097e+06	1.92411e+06	1.43955e+06	1.38167e+06	2.61519e+06	1.40717e+06	1.11538e+06	1.94534e+06	2.66268e+06	990527	1.23153e+06	1.00328e+06	2.29484e+06	2.10991e+06	1.42601e+06	505694	336859		1.00445	0.354393	-0.00350355	0.355612	-0.354413	-0.0755191	-0.474805	-0.584277	-0.25941	0.218841	-0.95144	-0.428583	0.878309	1.40113	0.149039	-1.11625	-1.38198	0.57116	1.03631	-0.0323857	0.196827	-0.679485		0.499688	0.499255	0.499842
O75970	235537	131329	4812.4	111542	87956.7	91935.3	140907	119084	69282.9	81690.7	119786	172703	70580.9	82242.3	97958.3	65785.6	52263.6	74088.1	46215.8	55696.4	NA	NA		1.9945	0.536777	-4.46806	0.348871	-0.430653	0.231499	0.339527	0.546047	-0.367239	-0.316745	0.228329	1.43454	0.73925	1.65173	1.83648	-0.738764	-1.07522	0.488512	0.356481	-0.0129267	NA	NA		0.347092	0.499255	8.12e-09
O75976	0	5012.58	0	496.703	0	1040.07	15343.2	1848.77	1837.74	2494.64	0	14883.8	695.409	0	0	2976.53	0	455.929	0	398.651	NA	NA		NA	0.995723	NA	-1.9269	NA	-0.133756	2.34604	1.02991	-0.99657	-0.261698	NA	2.7104	0.0123218	NA	NA	0.983725	NA	-0.846324	NA	-1.55456	NA	NA		NA	0.438476	NA
O76003	12848.8	42477.3	37751.9	59991.9	117221	39180	22412.5	30973.1	43080.8	31358.5	29917.7	4596.37	9639.66	8002.02	703.124	71416.1	59666.1	6097.01	2785.92	16074.1	696853	1.22571e+06		-0.354018	0.805289	0.516103	1.34923	1.81707	0.932966	-0.503715	0.527824	0.808003	0.174364	0.0793977	-2.0452	-0.225287	0.391201	-3.3552	1.27986	1.01795	-1.19158	-1.74385	0.146073	0.997933	1.27067		0.499688	0.497436	0.499842
O76009	NA	NA	NA	NA	NA	NA	NA	NA	NA	NA	NA	NA	NA	NA	NA	NA	NA	NA	NA	NA	0	0		NA	NA	NA	NA	NA	NA	NA	NA	NA	NA	NA	NA	NA	NA	NA	NA	NA	NA	NA	NA	NA	NA		NA	NA	NA
O76013	5331.35	3586.73	1245.32	27889.4	12970.6	3162.03	2960.19	7480.34	12041.3	7616.96	805.054	888.209	7288.06	72149	2955.41	1039.49	2020.49	1056.79	150.485	62458.4	11742.7	13782.8		0.0323326	-0.641667	-2.20484	2.11847	0.631796	-0.596222	-1.3331	0.89892	0.829069	0.273965	-2.95259	-2.53901	1.4427	6.01916	1.23757	-2.78759	-1.94826	-1.68646	-3.49686	4.04321	1.41911	1.06344		0.499688	0.499255	0.0151617
O76021	15125.8	32279	35982.1	42692.5	44510.7	17423.9	30256.9	22586.3	41865.8	26100.9	17875.4	44771.7	7870.79	2429.43	22768.9	14067.8	24166.8	6196.95	25947	3339.94	NA	NA		-0.114069	0.4095	0.39818	0.806009	0.25769	-0.300613	-0.128301	0.110925	0.664597	-0.160891	-0.71304	1.29676	-0.51359	-1.32747	2.02214	-1.21823	-0.403628	-1.17573	1.76693	-2.28198	NA	NA		0.499688	0.499255	0.499842
O76024	0	0	310.954	0	0	0	0	0	0.0202696	0	0	0	0	0	0	0	0	0	0	0	NA	NA		NA	NA	6.33541	NA	NA	NA	NA	NA	-17.2864	NA	NA	NA	NA	NA	NA	NA	NA	NA	NA	NA	NA	NA		NA	NA	3.79e-22
O76031	11306.4	66338.1	65446.3	29429.5	52615.5	38568.5	51359.5	39315.5	39319.2	56201.8	60901.9	42621.2	37312.2	10663.1	13829	55347.3	53305.1	36424.8	21651.2	42850.2	0	10757.9		-1.5146	0.494239	0.305041	-0.722618	-0.457551	-0.0898287	-0.312798	-0.063322	-0.398214	0.0113196	0.13817	0.239284	0.831925	-0.102585	0.239951	-0.135754	-0.192189	0.497482	0.457751	0.58353	NA	-0.378197		0.365192	0.499255	0.499842
O76064	NA	NA	NA	NA	NA	NA	NA	NA	NA	NA	NA	NA	NA	NA	NA	NA	NA	NA	NA	NA	38058	34468.1		NA	NA	NA	NA	NA	NA	NA	NA	NA	NA	NA	NA	NA	NA	NA	NA	NA	NA	NA	NA	0.29874	-0.499473		NA	NA	NA
O76071	NA	NA	NA	NA	NA	NA	NA	NA	NA	NA	NA	NA	NA	NA	NA	NA	NA	NA	NA	NA	67048.1	84069.9		NA	NA	NA	NA	NA	NA	NA	NA	NA	NA	NA	NA	NA	NA	NA	NA	NA	NA	NA	NA	1.21763	0.941033		NA	NA	NA
O76094	55732.5	61722	104762	80312.8	137852	59645.8	127810	73339.7	106021	69849.6	119637	68892.6	18588.2	5371.98	22001.9	170230	189727	39503.7	18834.2	37016.9	217735	110625		0.132196	-0.309611	0.416023	0.122798	0.457687	-0.118938	0.452808	0.124339	0.523309	-0.276678	0.49127	0.331222	-0.94326	-1.99904	-0.0202879	0.942521	1.11569	-0.119413	-0.642462	-0.292839	1.45853	-0.0706806		0.499688	0.499255	0.499842
O94760	NA	NA	NA	NA	NA	NA	NA	NA	NA	NA	NA	NA	NA	NA	NA	NA	NA	NA	NA	NA	6745.3	37334.9		NA	NA	NA	NA	NA	NA	NA	NA	NA	NA	NA	NA	NA	NA	NA	NA	NA	NA	NA	NA	-1.57684	0.532306		NA	NA	NA
O94776	114732	142327	142847	62334.5	146006	123936	108908	138751	45559.9	74407.4	158623	77642.6	70674.1	55503.9	43333.7	175115	148337	100673	77117	45518.9	116936	163842		0.514616	0.275621	0.292261	-0.872645	0.00504819	0.300862	-0.406357	0.382678	-1.32883	-0.81371	0.278115	-0.135186	0.347618	0.58106	0.168882	0.365829	0.129285	0.532397	0.706754	-0.709709	-0.478688	-0.403299		0.499688	0.499255	0.499842
O94788	NA	NA	NA	NA	NA	NA	NA	NA	NA	NA	NA	NA	NA	NA	NA	NA	NA	NA	NA	NA	0	0		NA	NA	NA	NA	NA	NA	NA	NA	NA	NA	NA	NA	NA	NA	NA	NA	NA	NA	NA	NA	NA	NA		NA	NA	NA
O94804	NA	NA	NA	NA	NA	NA	NA	NA	NA	NA	NA	NA	NA	NA	NA	NA	NA	NA	NA	NA	0	0		NA	NA	NA	NA	NA	NA	NA	NA	NA	NA	NA	NA	NA	NA	NA	NA	NA	NA	NA	NA	NA	NA		NA	NA	NA
O94826	22491.8	26194	13864	19138.5	16148.5	18931.5	32883.5	18790.3	28335.8	26134.5	16647.3	12986.9	8656.44	0	407.116	35579.2	71056.4	6512.16	9730.69	9505.16	NA	NA		0.86813	0.517879	-0.61019	-0.01921	-0.875551	0.237791	0.414081	0.295753	0.469008	0.249178	-0.390641	-0.165217	0.0425602	NA	-2.53124	0.591068	1.63432	-0.692925	0.782774	-0.321897	NA	NA		0.499688	0.499255	0.499842
O94832	NA	NA	NA	NA	NA	NA	NA	NA	NA	NA	NA	NA	NA	NA	NA	NA	NA	NA	NA	NA	3.16195e+06	1.0004e+06		NA	NA	NA	NA	NA	NA	NA	NA	NA	NA	NA	NA	NA	NA	NA	NA	NA	NA	NA	NA	2.19489	0.00118491		NA	NA	NA
O94842	NA	NA	NA	NA	NA	NA	NA	NA	NA	NA	NA	NA	NA	NA	NA	NA	NA	NA	NA	NA	0	7310.29		NA	NA	NA	NA	NA	NA	NA	NA	NA	NA	NA	NA	NA	NA	NA	NA	NA	NA	NA	NA	NA	1.20814		NA	NA	NA
O94874	NA	NA	NA	NA	NA	NA	NA	NA	NA	NA	NA	NA	NA	NA	NA	NA	NA	NA	NA	NA	1421.02	1974.28		NA	NA	NA	NA	NA	NA	NA	NA	NA	NA	NA	NA	NA	NA	NA	NA	NA	NA	NA	NA	-0.125087	-1.35541		NA	NA	NA
O94888	NA	NA	NA	NA	NA	NA	NA	NA	NA	NA	NA	NA	NA	NA	NA	NA	NA	NA	NA	NA	37864.7	19945.5		NA	NA	NA	NA	NA	NA	NA	NA	NA	NA	NA	NA	NA	NA	NA	NA	NA	NA	NA	NA	-0.583822	-2.25199		NA	NA	NA
O94901	8023.1	8320.52	5031.29	2227.18	10706.5	3419.03	4243.81	2772.88	15599.6	12484.7	12768.4	257747	9524.24	6720.8	6917.43	1607.72	3476.82	6199.77	9146.51	7428.14	NA	NA		0.0393069	-0.326069	-1.20972	-2.47762	-0.612043	-1.45859	-1.78018	-1.61476	0.394672	0.00550972	0.147455	5.16706	1.00287	1.56657	1.65509	-2.1344	-1.03265	0.057154	1.66959	0.0906957	NA	NA		0.499688	0.499255	0.250554
O94905	1.14726e+07	2.15271e+06	921238	2.49847e+06	980775	878304	4.03116e+06	1.06947e+06	847880	7.03176e+06	1.30577e+06	989986	956900	1.14061e+06	9.40693e+06	1.1951e+08	1.80823e+06	2.63473e+06	1.48092e+06	1.30539e+06	3.25206e+06	7.00354e+06		2.84764	-0.504421	-1.48919	-0.0241581	-1.58956	-1.45735	0.33552	-1.31741	-1.20121	1.41318	-1.37338	-0.914487	-0.476901	-0.231675	3.16742	5.4157	-0.769016	0.443633	0.205353	-0.464517	1.10169	2.00304		0.158395	0.499255	0.134791
O94906	20625.5	64697.1	61943.1	49831.7	73669.1	44352.3	45270.7	47940.7	56059.9	51684	48938.8	45534.4	64564.5	12812.9	17070.9	53760.6	69891.7	46675.7	29117.9	50323.6	1.11469e+06	785997		-0.971432	0.152766	0.0620155	-0.18185	-0.026759	-0.17617	-0.680681	-0.132375	-0.00457289	-0.318435	-0.432818	0.110574	1.28129	-0.425666	-0.0893508	-0.356383	0.0457871	0.484432	0.352491	0.52713	1.78256	0.781792		0.499688	0.499255	0.499842
O94919	10856.5	30033.9	15046	23931	18175.3	104978	16307.8	13190.7	11577	34213.8	12860.6	7081.01	16691.3	17281.2	10020	10196.4	28883.7	8219.69	33446.6	11536.3	1.81088e+06	4.70981e+06		-0.704576	0.183542	-0.975828	-0.129363	-1.08734	2.29034	-1.10043	-0.845152	-1.2743	0.183827	-1.2914	-1.52174	0.491397	1.45692	0.527769	-1.73768	-0.187054	-0.847655	1.87435	-0.460289	3.26733	4.10642		0.499688	0.499255	0.371835
O94925	NA	NA	NA	NA	NA	NA	NA	NA	NA	NA	NA	NA	NA	NA	NA	NA	NA	NA	NA	NA	0	0		NA	NA	NA	NA	NA	NA	NA	NA	NA	NA	NA	NA	NA	NA	NA	NA	NA	NA	NA	NA	NA	NA		NA	NA	NA
O94952	170588	140812	112205	148970	86170.9	144568	185825	134489	190846	120894	169133	68124.5	76123.8	103683	76636.5	121806	153554	152200	98531	102523	236258	125281		0.651782	-0.17691	-0.45712	0.0240316	-1.13948	0.106297	-0.0242572	-0.105425	0.421982	-0.516992	-0.0544786	-0.737963	0.0129145	0.946546	0.507664	-0.600387	-0.251473	0.653471	0.587601	0.0298369	-0.0450437	-1.35477		0.499688	0.499255	0.499842
O94973	NA	NA	NA	NA	NA	NA	NA	NA	NA	NA	NA	NA	NA	NA	NA	NA	NA	NA	NA	NA	9228.06	7828.88		NA	NA	NA	NA	NA	NA	NA	NA	NA	NA	NA	NA	NA	NA	NA	NA	NA	NA	NA	NA	0.0513343	-0.843664		NA	NA	NA
O94992	4519.89	38491.4	38892.6	22891.7	57586.3	22592.5	45244.7	24023	28457.1	27982.1	29821.2	11466.4	11696.4	7110.75	2543.44	34289.1	28601.1	12836.9	4068.65	16399.7	89102.1	140606		-1.79046	0.764954	0.616834	-0.0022623	0.77903	0.202683	0.590717	0.274908	0.220841	0.0645856	0.157769	-0.623569	0.185131	0.372971	-1.22357	0.244216	-0.0276935	0.0286298	-0.977312	0.247978	-0.13816	-0.0688383		0.287202	0.499255	0.499842
O95071	3.16979e+06	165205	69126.5	185417	66667.3	95085.6	120637	103230	134432	226762	176647	156574	87118.5	152198	51875.4	143981	195191	190627	75588.5	163308	17582.3	51880.7		4.73817	-0.226733	-1.53406	0.00760255	-1.92419	-0.817778	-0.989273	-0.772688	-0.464732	0.112937	-0.292238	0.176314	-0.0552684	1.43191	-0.242875	-0.65753	-0.193408	0.786062	-0.0210132	0.489363	-0.839578	0.3106		0.005385	0.499255	0.122683
O95163	NA	NA	NA	NA	NA	NA	NA	NA	NA	NA	NA	NA	NA	NA	NA	NA	NA	NA	NA	NA	29476.4	148404		NA	NA	NA	NA	NA	NA	NA	NA	NA	NA	NA	NA	NA	NA	NA	NA	NA	NA	NA	NA	-0.856472	1.0902		NA	NA	NA
O95197	25660.9	96139.7	134492	78456.7	190857	95768.1	93509.6	131947	163614	108087	93418.7	231580	93086	27309.2	42607.5	100166	95740.2	89266.7	35209.5	60462.2	NA	NA		-1.65207	-0.224335	0.29245	-0.45008	0.496047	0.00316421	-0.555431	0.399209	0.666044	-0.175937	-0.429313	1.59678	0.853915	-0.394248	0.233894	-0.385234	-0.443853	0.444127	-0.37774	-0.206939	NA	NA		0.335972	0.499255	0.499842
O95218	108691	266559	215227	187004	236223	136695	176583	191294	246255	201826	240990	271039	117437	103308	121118	193636	187875	146829	146479	129407	624144	948123		-0.554097	0.203086	0.0239117	-0.168561	-0.0951192	-0.497289	-0.618185	-0.110576	0.37804	-0.270376	-0.0751445	0.823936	0.127157	0.256396	0.570602	-0.448601	-0.488964	-0.00711246	0.589667	-0.179468	-0.137016	0.155192		0.499688	0.499255	0.499842
O95232	62739	16127.2	57272.1	79089.1	72153.3	183287	61755.2	43700.7	57624.8	70771.2	64424.5	43541.5	94305	11897	15423.2	51959.3	64422.2	35944.2	13031.6	53296.7	147628	121518		0.641748	-1.98108	-0.172192	0.422332	-0.200958	1.87997	-0.313081	-0.31499	-0.0704674	0.0615949	-0.11018	-0.0291359	1.80606	-0.447288	-0.188097	-0.508989	-0.178131	0.0794078	-0.845465	0.581052	0.61933	-0.205967		0.499688	0.0989174	0.499842
O95239	NA	NA	NA	NA	NA	NA	NA	NA	NA	NA	NA	NA	NA	NA	NA	NA	NA	NA	NA	NA	141414	152280		NA	NA	NA	NA	NA	NA	NA	NA	NA	NA	NA	NA	NA	NA	NA	NA	NA	NA	NA	NA	0.699606	0.235456		NA	NA	NA
O95248	71134.6	5257.96	27437.5	2974.3	3858.56	5701.79	1776.15	1358.64	4862.42	4749.02	768.515	70988.4	9138.8	536.685	685.905	6930.62	2702.1	1449.56	2820.34	1779.8	NA	NA		3.91023	-0.233668	2.21219	-0.302167	-1.35667	0.115867	-1.25317	-1.84521	-0.648641	-0.629182	-3.24951	3.92938	1.67212	-0.401708	-0.0151152	-0.151813	-1.69701	-1.38999	0.716843	-0.328317	NA	NA		0.0326897	0.499255	0.00454323
O95292	108590	76372	77580.1	78542.1	112014	94874.7	92199.8	71140.5	113085	129541	87673.6	53801.8	94882.9	28465.1	58173.7	63618.7	72546.5	52193	30011.9	42219.8	26959.2	24738.5		0.822226	-0.315329	-0.392244	-0.240257	-0.226414	0.255607	-0.381859	-0.231078	0.263573	0.300178	-0.309114	-0.37112	1.17839	0.261325	1.19384	-0.875036	-0.671301	0.00352136	-0.219203	-0.40937	0.335044	-0.349344		0.499688	0.499255	0.499842
O95299	29497.2	39839.2	14039.8	7688.24	20715.4	6014.47	25616.3	8244.26	30642.5	101941	23908.3	2759.83	4815.1	6000.23	0	42034.6	30552.5	11347.1	3860.91	47171	NA	NA		1.29232	1.16891	-0.573496	-1.38256	-0.482862	-1.47849	0.0536832	-0.930169	0.602986	2.32285	0.174324	-2.49016	0.21972	0.494485	NA	0.859976	0.374942	0.162577	-0.594284	2.11428	NA	NA		0.496409	0.40823	0.499842
O95347	1.17328e+06	1.16668e+06	1.03367e+06	857235	908644	863494	1.06531e+06	1.04673e+06	6.31675e+06	8.29866e+06	1.08299e+06	997094	885201	781607	637876	572704	550881	682732	734573	760799	332159	332603		0.185646	-0.619991	-0.547651	-0.819821	-0.946253	-0.696677	-0.865867	-0.552075	2.45313	2.416	-0.824374	-0.0933508	0.204356	0.141063	0.0294499	-1.7678	-1.79679	-0.704838	-0.0184584	-0.475227	0.106298	-0.185652		0.499688	0.499255	0.499842
O95373	94476.4	99287.8	111283	91659.8	130289	103842	230131	180048	139929	158366	239596	147914	239637	82103.7	84075	235186	250518	119660	84183.8	176984	301086	474244		-0.42883	-0.899186	-0.637143	-0.883765	-0.677596	-0.571132	0.109829	0.135818	-0.19053	-0.303654	0.267648	0.239537	1.52424	0.332052	0.407593	0.185227	0.28082	0.0641531	0.129581	0.635198	-0.387105	-0.0520197		0.499688	0.469035	0.499842
O95394	15130.2	8739.64	37540.7	11583	54018.4	11120	19159.2	14497.3	26773.6	10028.6	17919.8	0	0	1035.74	0	17064.5	19660.7	1294.41	0	1075.79	30454.6	45648.2		0.749092	-0.64423	1.38009	-0.285075	1.43421	-0.0735097	0.0918417	0.398807	0.870345	-0.698275	0.21399	NA	NA	-0.638907	NA	-0.0256453	0.18406	-1.58505	NA	-2.05769	-0.53852	-0.536446		0.499688	0.499255	0.122758
O95400	277494	187130	147366	300204	174129	119240	147392	165046	97444.8	124754	154389	163738	129637	92718.1	70254	231841	161695	142521	71670.8	219508	55306.2	76040.3		1.20382	0.0456256	-0.325962	0.808243	-0.417453	-0.393574	-0.60684	0.0148073	-0.860918	-0.690945	-0.407381	0.328913	0.625688	0.798344	0.306297	0.135946	-0.388825	0.446315	-0.00705521	1.02141	0.844534	0.850874		0.499688	0.499255	0.499842
O95425	NA	NA	NA	NA	NA	NA	NA	NA	NA	NA	NA	NA	NA	NA	NA	NA	NA	NA	NA	NA	213801	51242.4		NA	NA	NA	NA	NA	NA	NA	NA	NA	NA	NA	NA	NA	NA	NA	NA	NA	NA	NA	NA	2.99233	0.0621263		NA	NA	NA
O95433	448699	143031	121116	44617	128472	76285.7	201940	103169	51165.7	192446	218897	228391	128706	157087	114897	213671	341119	146391	90566.7	141164	257483	272795		1.92169	-0.321084	-0.489993	-1.92613	-0.681931	-1.00238	-0.0569398	-0.662934	-1.67345	0.0147121	0.165454	0.909993	0.630069	1.35423	0.918327	0.0733272	0.771465	0.408231	0.279582	0.333606	-0.255842	-0.517176		0.361674	0.499255	0.499842
O95470	258385	237662	147208	225741	156997	176054	179882	183657	163410	161236	123513	177604	170905	134708	141527	183277	125666	126197	190856	142513	NA	NA		0.852568	0.170127	-0.447013	0.233145	-0.623547	-0.00927779	-0.487232	-0.0598331	-0.170723	-0.507559	-0.959568	0.295667	0.807614	0.833287	0.957302	-0.418478	-0.986314	-0.0957518	1.12943	0.0852697	NA	NA		0.499688	0.499255	0.499842
O95486	NA	NA	NA	NA	NA	NA	NA	NA	NA	NA	NA	NA	NA	NA	NA	NA	NA	NA	NA	NA	729587	764280		NA	NA	NA	NA	NA	NA	NA	NA	NA	NA	NA	NA	NA	NA	NA	NA	NA	NA	NA	NA	2.79778	2.33757		NA	NA	NA
O95573	493234	186505	244737	241986	212687	183831	355974	207125	250381	218862	192273	185200	252670	92638.7	80402.9	188710	195111	148875	118911	208764	317317	669273		1.50687	-0.498729	0.0242643	0.0346679	-0.449196	-0.241458	0.239109	-0.177627	0.188483	-0.340101	-0.589446	0.0627374	1.08104	-0.0578134	-0.208388	-0.66812	-0.616202	-0.157582	0.103597	0.351271	-0.00722876	0.771206		0.450634	0.499255	0.499842
O95613	NA	NA	NA	NA	NA	NA	NA	NA	NA	NA	NA	NA	NA	NA	NA	NA	NA	NA	NA	NA	6.63258e+06	1.54138e+07		NA	NA	NA	NA	NA	NA	NA	NA	NA	NA	NA	NA	NA	NA	NA	NA	NA	NA	NA	NA	-0.409095	0.748555		NA	NA	NA
O95678	0	0	0	0	0	0	0	0	0	0	0	0	0	0	0	0	0	0	0	0	0	0		NA	NA	NA	NA	NA	NA	NA	NA	NA	NA	NA	NA	NA	NA	NA	NA	NA	NA	NA	NA	NA	NA		NA	NA	NA
O95684	858.657	0	9700.15	0	0	0	0	0	3839.98	0	78752.4	0	0	0	0	10081.5	0	0	0	0	NA	NA		-2.33673	NA	0.0947427	NA	NA	NA	NA	NA	-0.455518	NA	3.65849	NA	NA	NA	NA	1.0634	NA	NA	NA	NA	NA	NA		0.148429	NA	0.499842
O95757	96091.7	69084.9	80146.9	126973	116567	86233.5	151358	77611.8	180246	100584	91269.5	65689.8	28635.9	25679.4	30915.3	71759.3	117252	40848.6	39259.4	111841	164726	240574		0.612674	-0.439501	-0.211175	0.542999	0.0237175	0.120926	0.441596	-0.120255	1.07362	-0.00601156	-0.184995	-0.0252318	-0.634868	-0.193256	0.0338514	-0.602324	0.138702	-0.444632	0.0666639	0.991537	-0.665144	-0.533307		0.499688	0.499255	0.499842
O95777	NA	NA	NA	NA	NA	NA	NA	NA	NA	NA	NA	NA	NA	NA	NA	NA	NA	NA	NA	NA	49967.7	80515.6		NA	NA	NA	NA	NA	NA	NA	NA	NA	NA	NA	NA	NA	NA	NA	NA	NA	NA	NA	NA	0.142733	0.262303		NA	NA	NA
O95785	12700.9	26981.2	54791.1	36732.1	51535.5	43640.6	52657.2	33219.3	64065.6	37191	48249.8	36541.6	16455.2	10099.7	3610.33	32035.5	62311.1	23525.8	10428.6	1936.61	6668.72	39797.6		0.19349	-0.303247	0.589614	0.106338	0.0173903	0.623798	0.254845	0.275892	0.83114	-0.0810742	0.341782	0.531114	0.146802	0.378468	-0.113027	-0.428262	0.564448	0.375823	0.00437527	-3.53266	0.765631	1.78822		0.499688	0.499255	0.499842
O95793	164706	239699	394205	795507	341218	395278	296591	144683	369149	431579	175822	104006	18655.7	41044	22618.8	319974	434794	192048	1.22544e+07	123570	61504.3	111476		-0.205852	-0.196484	0.581765	1.69079	0.0649911	0.784608	-0.149956	-0.807843	0.566712	0.560256	-0.810914	-0.933075	-2.88896	-1.19404	-2.09037	0.0213399	0.484935	0.211717	6.97121	-0.493397	0.509214	1.00375		0.499688	0.499255	0.499842
O95816	223302	329569	455258	158567	493105	7.16084e+06	1.27987e+07	361259	257245	1.62589e+06	438448	340645	261401	392998	224735	1.37526e+06	1.17995e+06	617185	294552	776697	2.47492e+06	9.36773e+06		-1.1641	-1.29231	-0.590605	-2.162	-0.699509	3.63653	4.00772	-0.930174	-1.18255	1.13625	-0.965362	-0.522359	-0.428813	0.380804	-0.302987	0.710695	0.500959	0.351129	-0.15945	0.735268	2.47735	4.13932		0.475498	0.345072	0.499842
O95831	207922	304882	370404	243980	457294	348754	528527	292819	386609	356351	447306	316678	216020	103366	115615	439991	442195	209897	148249	275870	757626	869319		-0.238269	-0.313211	0.166446	-0.456462	0.238627	0.215811	0.337117	-0.158957	0.447234	-0.0769679	0.150831	0.414711	0.359435	-0.487352	-0.202065	0.0875457	0.108554	-0.172281	-0.089121	0.266785	-0.282115	-0.404409		0.499688	0.499255	0.499842
O95861	1.02723e+06	1.24851e+06	826944	829729	631728	1.16683e+06	981474	979055	841715	894346	1.29415e+06	1.12642e+06	1.58085e+06	1.74806e+06	1.29147e+06	1.02215e+06	785972	1.55004e+06	1.62349e+06	1.09853e+06	0	1101.71		0.0993694	-0.195812	-0.663815	-0.64528	-1.32115	0.00229239	-0.758309	-0.372715	-0.475147	-0.745528	-0.267773	0.256911	1.3076	1.7682	1.40009	-0.666697	-1.05271	0.806237	1.47827	0.311547	NA	-2.5872		0.499688	0.499255	0.499842
O95864	40699.7	2802.06	1090.03	1859.87	1006.98	393.07	1202.34	608.201	3618.38	1710.72	2731.08	0	8313.6	688.067	0	3241.94	1675.98	421.913	200.893	3976.96	NA	NA		4.04056	0.292463	-0.990532	-0.764956	-0.868589	-2.45765	-1.35606	-1.51479	0.227033	-0.616023	0.219909	NA	2.89873	0.430983	NA	0.250172	-0.967828	-0.742295	-0.737996	1.0669	NA	NA		0.0250384	0.499255	0.364922
O95881	263568	1.03227e+06	659918	419470	666455	630274	513872	521749	209707	581723	512826	315603	260195	340687	336280	452595	477311	359492	337725	301059	729755	916775		-0.463526	0.932786	0.45102	-0.223533	0.222071	0.523626	-0.278155	0.128653	-1.04528	0.0749894	-0.216713	-0.16874	0.0630033	0.721914	0.81629	-0.442879	-0.351154	0.0566847	0.565525	-0.176444	1.24304	1.25474		0.499688	0.458282	0.499842
O95983	9560.2	11101.6	31875.4	7871.33	1273.14	15.6098	28.8282	2.58578	328.255	0	0	0	128.899	58.8972	5.52286	123.686	0	0	0	42.3081	NA	NA		4.6877	6.38291	7.52818	3.97038	2.46693	-3.46964	-3.97601	-5.80364	-0.781817	NA	NA	NA	-0.787944	-0.302434	-3.55132	-0.614781	NA	NA	NA	-2.46081	NA	NA		0.00574578	1.68e-12	3.39e-31
O96005	21884.2	3132.53	5880.2	176691	20283.5	2636.99	15886.1	2673.19	20135.4	26196.2	15474.9	14817.8	6121.99	6847.16	7852.88	36367.2	21411.5	20475	7629.05	30322.6	0	0		0.812186	-2.69701	-1.91404	3.32074	-0.542173	-2.74705	-0.695466	-2.65626	-0.0598421	0.240562	-0.510718	0.0213534	-0.491752	0.664941	0.883072	0.611707	-0.190276	1.02511	0.404591	1.41611	NA	NA		0.499688	0.0124718	0.0413783
O96013	NA	NA	NA	NA	NA	NA	NA	NA	NA	NA	NA	NA	NA	NA	NA	NA	NA	NA	NA	NA	34461.2	26677.8		NA	NA	NA	NA	NA	NA	NA	NA	NA	NA	NA	NA	NA	NA	NA	NA	NA	NA	NA	NA	1.1572	0.113579		NA	NA	NA
O96019	48249.5	75377.3	74765.9	52037.5	127897	50538.2	121453	67123.4	38713.7	672675	58431.5	69970.8	26901.7	25835.9	27492.3	110129	135313	29932.2	78919.7	75981.5	NA	NA		-0.262831	-0.17201	-0.214496	-0.679734	0.241326	-0.541061	0.237784	-0.184138	-1.12735	2.98689	-0.730138	0.19817	-0.580641	0.0754313	0.0758259	0.16034	0.482521	-0.735657	1.30769	0.596093	NA	NA		0.499688	0.499255	0.499842
P00167	13337	15315.5	16933.4	171985	22418.5	12688.3	24959	24150.3	20573.2	26107.3	32909.2	9515.82	12270.8	2674.1	5185.54	25702.1	19451.6	11152.1	2400.5	6144.63	60815.4	115661		-0.0489559	-0.461537	-0.480529	3.11759	-0.516377	-0.523043	-0.166515	0.4536	-0.150786	0.0886376	0.449795	-0.773117	0.401716	-0.929919	0.0345727	-0.0601319	-0.472094	-0.0412738	-1.55466	-1.0964	0.140842	0.486834		0.499688	0.499255	0.499842
P00338	715913	1.42878e+06	1.03178e+06	1.24723e+06	1.60954e+06	851581	1.15533e+06	942213	794062	805994	1.12909e+06	359174	179278	229066	303459	837537	1.01273e+06	439018	262564	604992	1.48562e+06	2.05596e+06		0.426215	0.632631	0.409211	0.696719	0.867927	0.239618	0.216324	0.243226	0.345326	-0.0865776	0.185958	-0.656681	-1.21422	-0.758541	-0.136122	-0.241094	0.0752266	-0.4177	-0.601636	0.14369	-0.623941	-0.424492		0.499688	0.499255	0.499842
P00367	502545	52345.6	84437.7	239428	158010	60992.5	133120	61662.4	93165.4	226295	179554	149444	107762	27564.1	39058.1	225137	255862	98529.9	60925.4	211092	693020	743507		2.35474	-1.55394	-0.752895	0.841223	-0.0964398	-1.06679	-0.40834	-1.16196	-0.502438	0.523562	0.135487	0.550292	0.631833	-0.990291	-0.433568	0.417039	0.609066	0.0743648	-0.052764	1.19483	0.2574	0.0199198		0.256904	0.235323	0.470788
P00374	0	70311.6	21031.8	38840.4	163711	37224.2	76758	31728.4	0	86475	105779	4618.33	3983.9	10995.8	5837.15	179163	110790	14943.9	1835.9	711.027	0	0		NA	1.07526	0.176366	0.0495619	1.68581	0.33205	0.772662	0.235668	NA	1.10969	1.50564	-1.6297	-1.05268	0.485874	0.617413	2.10135	1.33516	-0.410028	-2.55774	-4.15415	NA	NA		NA	0.432675	0.499842
P00387	21999	26571.6	18711.1	87985.2	32305.6	13267.1	18767.5	11217	17708.1	57913.4	21314.5	5280.13	9095.31	624.726	1120.11	86994	1.47842e+06	6628.26	7881.49	36044	NA	NA		0.424779	0.0882456	-0.616023	1.87126	-0.251019	-0.738677	-0.875517	-0.974955	-0.658575	1.01461	-0.475657	-1.95393	-0.32314	-3.40447	-2.55266	1.50344	5.7743	-1.1015	-0.0631333	1.28049	NA	NA		0.499688	0.499255	0.499842
P00390	446148	201636	398861	265089	330504	331229	435800	470561	423102	263824	320749	202198	156431	95737.5	172161	263979	366175	227927	174113	139984	1.32584e+06	1.01075e+06		0.976602	-0.850383	0.355141	-0.254527	-0.165672	0.217467	0.12855	0.62506	0.66079	-0.445399	-0.265792	-0.173838	-0.0423347	-0.523777	0.468415	-0.594183	-0.0936581	0.0285855	0.228246	-0.664107	0.343802	-0.386714		0.499688	0.489222	0.499842
P00403	66636.5	60443.3	142458	359777	156093	55604.1	113877	65038.3	206554	148281	127440	101847	38240	5691.58	5871.54	211660	220211	40989.4	11956.6	44565.9	112934	467955		0.192033	-0.515421	0.765103	2.21356	0.5769	-0.409277	0.140008	-0.259482	1.39681	0.693753	0.434002	0.749188	-0.0807121	-2.30419	-2.31001	1.12922	1.19878	-0.313533	-1.57657	-0.252133	-1.42584	0.254056		0.499688	0.499255	0.434271
P00441	469426	1.04958e+06	775800	839091	956457	644349	927215	787386	527498	647686	1.0734e+06	485159	287637	263671	282690	650616	855792	569457	330474	368160	1.02555e+06	912814		-0.0456572	0.363934	0.163359	0.286133	0.266248	0.00662826	0.0648765	0.165454	-0.108912	-0.243574	0.304074	-0.0263182	-0.329455	-0.326072	-0.0366856	-0.440601	-0.00571647	0.1682	-0.0641897	-0.417214	-0.57024	-1.04096		0.499688	0.499255	0.499842
P00450	110866	391963	161586	374738	157148	132449	188227	159435	98073.1	307662	133326	145517	98089.3	144217	166147	116964	62258.2	105260	221969	84108.9	79866.3	384594		-0.288106	1.0441	-0.229674	1.08481	-0.569007	-0.330907	-0.314217	-0.154778	-0.888073	0.567268	-0.712365	0.0797609	0.0883961	1.16735	1.37544	-0.965576	-1.89739	-0.182123	1.50585	-0.560707	-0.50323	1.45375		0.499688	0.43458	0.499842
P00491	6593.31	93006.2	78971.6	57288.6	113074	74737.6	45776.9	51202.9	49606.2	89426.1	46764.5	8965.72	5634.09	5829.2	12670	67106.1	128426	8315.04	32677.9	7315.16	47568	65281.1		-1.98337	1.32333	0.929811	0.61956	1.05905	1.23709	-0.127899	0.63687	0.320822	1.05418	0.0784102	-1.72892	-1.65972	-0.682597	0.376046	0.505904	1.46914	-1.36984	1.33248	-1.69168	-0.117995	-0.247178		0.233384	0.339387	0.356622
P00492	2.77739e+06	2.69144e+06	2.81771e+06	1.76246e+06	2.4086e+06	3.35027e+06	2.87491e+06	3.04238e+06	2.58857e+06	1.51892e+06	2.67371e+06	2.62411e+06	2.85444e+06	3.00922e+06	2.72093e+06	2.15908e+06	1.71173e+06	2.82072e+06	3.00301e+06	2.5939e+06	90275	167357		0.472084	-0.421553	-0.083119	-0.781369	-0.515896	0.286294	-0.414022	-0.00862995	0.142527	-1.12531	-0.535573	0.306266	0.911347	1.03926	1.11146	-0.816973	-1.12223	0.337543	1.02299	0.320675	-1.31196	-0.663137		0.499688	0.499255	0.499842
P00505	92570.2	189168	168458	286468	265971	150230	217455	170200	173195	263233	298297	55235.5	93104.5	189943	78433.5	274751	320551	210035	54367.4	155377	109890	157038		-0.687	-0.169271	-0.245246	0.584197	0.161459	-0.247654	-0.200832	-0.174763	-0.0937847	0.226048	0.36577	-1.45095	-0.109435	1.34376	0.0716708	0.189132	0.420015	0.668927	-0.751805	0.212921	-1.53171	-1.33898		0.499688	0.499255	0.499842
P00558	486525	1.38482e+06	1.02501e+06	1.21135e+06	1.21122e+06	762108	1.17892e+06	873118	644228	767407	939972	286534	59472.8	70741.2	147826	1.06799e+06	1.27049e+06	344542	145059	226311	1.44814e+06	1.8464e+06		0.250737	1.02409	0.82404	1.07838	0.862983	0.503054	0.668158	0.566865	0.431975	0.253579	0.354459	-0.563373	-2.42794	-2.03213	-0.752135	0.542768	0.827367	-0.331087	-1.0408	-0.894865	-0.505131	-0.442742		0.499688	0.43458	0.404422
P00738	1.01272e+06	2.46298e+06	964894	2.32412e+06	985688	773211	825281	732347	704282	3.78241e+06	760492	481670	354841	1.12231e+06	464102	604768	459364	574886	1.09873e+06	318909	307830	1.53163e+06		0.618467	1.16702	0.0174853	1.33038	-0.162176	-0.191251	-0.579749	-0.408683	-0.157474	1.90678	-0.674587	-0.507559	-0.486863	1.37309	0.238294	-1.02055	-1.40476	-0.282646	1.25946	-1.10114	-0.93463	1.1505		0.499688	0.408308	0.499842
P00918	13530.1	109706	119317	110052	187213	93312.8	91131.1	74784.3	357363	466236	98029	59243.9	32180	24121.1	32407.7	99399.3	110101	27629.4	39545.4	33886	6.26659e+08	3.06987e+08		-2.50433	-0.131716	0.22694	0.108154	0.678065	-0.0151244	-0.539959	-0.474114	2.13479	2.09974	-0.394006	-0.308789	-0.737546	-0.990401	-0.387377	-0.388895	-0.21574	-1.46914	-0.352218	-1.11669	3.51394	2.14103		0.113505	0.499255	0.499842
P00966	38796.8	8436.57	5674.93	46053.5	20879.2	10811.8	15016.5	13924.9	39281.9	25700.9	40968.4	24557.4	9936.76	3215.12	4325.14	46754.6	47921.3	28843.9	11648.5	14251.1	NA	NA		1.47618	-1.4297	-2.20058	1.08869	-0.713842	-0.840743	-1.00495	-0.416936	0.737932	-0.00717577	0.725179	0.567295	0.0200928	-0.713114	-0.271689	0.769867	0.806733	1.32398	0.777781	0.0738283	NA	NA		0.459564	0.287964	0.0153051
P01034	5678.2	916.748	2186.24	1669.7	6029.49	6798.16	6826.33	66480.9	7495.36	436.492	10570.3	796.744	2795.33	2112.5	1534.39	4731.66	8251.14	2501.12	12427.7	3962.76	NA	NA		1.19138	-1.75288	-1.52563	-2.15699	-0.613864	0.451953	-0.196645	4.09708	0.0663299	-3.10939	0.778295	-2.78208	-0.0502843	0.689715	0.21844	-0.653694	0.0550135	-0.499295	3.02498	-0.106318	NA	NA		0.499688	0.169301	0.124453
P01602	NA	NA	NA	NA	NA	NA	NA	NA	NA	NA	NA	NA	NA	NA	NA	NA	NA	NA	NA	NA	0	0		NA	NA	NA	NA	NA	NA	NA	NA	NA	NA	NA	NA	NA	NA	NA	NA	NA	NA	NA	NA	NA	NA		NA	NA	NA
P01605	0	0	0	0	0	0	0	0	0	0	0	0	0	0	0	0	0	0	0	0	0	0		NA	NA	NA	NA	NA	NA	NA	NA	NA	NA	NA	NA	NA	NA	NA	NA	NA	NA	NA	NA	NA	NA		NA	NA	NA
P01615	501130	466041	325081	674156	253277	478476	588998	570460	503606	513473	592110	624885	525366	774061	750844	283703	386610	736347	647645	612823	NA	NA		0.116576	-0.775098	-1.07079	0.0340275	-1.66193	-0.365352	-0.544385	-0.23822	-0.114013	-0.52732	-0.508527	0.430279	0.650499	1.3855	1.52021	-1.62411	-1.13223	0.63956	1.03265	0.420939	NA	NA		0.499688	0.499255	0.328911
P01616	2.94644e+09	2.89626e+09	2573471238	2449686704	2461091767	3.20225e+09	3524016495	3337495923	2372184132	2089693869	3101227531	2238777906	2394501654	2948732773	2.53301e+09	2.00235e+09	1.99642e+09	2.56321e+09	2.03501e+09	2.49615e+09	6983615396	7817129131		-0.0261465	-0.0209939	0.0353397	-0.0915261	0.149759	0.118192	-0.0600893	0.100619	0.770252	-0.1963	0.0114962	-0.234025	-0.16867	-0.210905	0.202638	-0.248148	-0.0885277	-0.255537	-0.131947	-0.150712	-0.26711	0.0921926		0.499688	0.499799	0.499842
P01621	0	0	0	0	0	0	0	0	0	0	0	0	0	0	0	0	0	0	0	0	0	0		NA	NA	NA	NA	NA	NA	NA	NA	NA	NA	NA	NA	NA	NA	NA	NA	NA	NA	NA	NA	NA	NA		NA	NA	NA
P01625	5.19965e+06	7.26329e+06	6.46008e+06	3.51789e+06	4.78535e+06	6.92662e+06	6.84922e+06	7.53558e+06	2.39879e+06	2.94408e+06	5.81329e+06	3.74932e+06	4.1574e+06	4.42884e+06	4.34039e+06	3.23141e+06	3.00952e+06	3.86853e+06	4.06486e+06	3.17627e+06	6.29783e+06	1.44567e+07		0.6024	0.310962	0.399001	-0.563251	-0.21507	0.583543	0.0745113	0.573367	-0.534314	-0.890743	-0.190371	-0.0310275	0.604553	0.60018	0.927832	-0.956642	-0.994133	-0.0813274	0.635684	-0.247252	-0.410593	0.662031		0.499688	0.499255	0.499842
P01762	NA	NA	NA	NA	NA	NA	NA	NA	NA	NA	NA	NA	NA	NA	NA	NA	NA	NA	NA	NA	1.61941e+06	1.40442e+06		NA	NA	NA	NA	NA	NA	NA	NA	NA	NA	NA	NA	NA	NA	NA	NA	NA	NA	NA	NA	1.21412	0.635451		NA	NA	NA
P01814	251662	410175	118288	553355	288922	222522	218632	105476	158711	399881	140047	129719	121722	146140	103113	112660	135458	100269	147792	94356.1	360534	374125		0.770086	0.953275	-0.807083	1.53189	0.245696	0.303095	-0.225912	-0.919016	-0.265629	0.814881	-0.78993	-0.216029	0.257347	0.935741	0.455046	-1.16871	-0.892836	-0.455287	0.70995	-0.558856	0.564083	0.277026		0.499688	0.450725	0.445386
P01815	37464.7	40029.4	26034.4	52806.5	38974.2	18440.5	22157.5	13585.5	28670.6	43494.3	10641.1	14636.2	6982.06	20989.6	3345.49	9128.06	13441	10027.8	12492.8	23633.9	NA	NA		1.32712	0.812785	-0.0105865	1.1988	0.129113	-0.138641	-0.521744	-0.569922	0.165513	0.684671	-1.41594	-0.314463	-0.616373	2.00623	-0.779942	-1.7956	-1.21274	-0.372585	0.757805	0.740903	NA	NA		0.496409	0.497436	0.499842
P01859	1.32267e+07	1.4205e+07	1.03359e+07	9.92599e+06	7.99793e+06	1.11024e+07	1.04068e+07	1.21255e+07	9.01613e+06	7.97968e+06	1.04278e+07	1.11464e+07	1.09646e+07	1.20704e+07	1.22548e+07	6.79589e+06	6.37216e+06	1.05654e+07	1.11435e+07	1.00654e+07	3.04202e+07	2.94656e+07		0.662389	0.0850404	-0.136105	-0.276861	-0.649571	0.0237428	-0.572371	0.0303887	0.321662	-0.633877	-0.579704	0.255649	0.672479	0.620738	1.11818	-1.08401	-1.09409	0.0536468	0.790167	0.122684	0.247435	0.137081		0.499688	0.499255	0.499842
P01892	NA	NA	NA	NA	NA	NA	NA	NA	NA	NA	NA	NA	NA	NA	NA	NA	NA	NA	NA	NA	0	0		NA	NA	NA	NA	NA	NA	NA	NA	NA	NA	NA	NA	NA	NA	NA	NA	NA	NA	NA	NA	NA	NA		NA	NA	NA
P02042	26800.3	23801.5	23933.1	84013.2	22413.6	37624.6	27954.6	35280.9	21312.1	51934.3	10722.4	8324.52	8469.8	12421.6	13305.3	9284.06	7527.95	14420.2	15965.5	9264.13	18181.7	145956		0.824067	0.0244092	-0.136021	1.88791	-0.680145	0.926218	-0.165448	0.840888	-0.261915	0.945093	-1.38959	-1.13897	-0.319338	1.18209	1.25504	-1.74147	-2.05172	0.172542	1.07993	-0.649175	-1.51804	0.969931		0.499688	0.499255	0.499842
P02452	NA	NA	NA	NA	NA	NA	NA	NA	NA	NA	NA	NA	NA	NA	NA	NA	NA	NA	NA	NA	2.27127e+07	3.61106e+06		NA	NA	NA	NA	NA	NA	NA	NA	NA	NA	NA	NA	NA	NA	NA	NA	NA	NA	NA	NA	3.61922	0.385715		NA	NA	NA
P02462	131484	392674	107537	314302	174713	265597	422551	280965	7708.01	440270	245937	141040	173784	194008	149813	26815.9	111797	37040.6	191445	25966	53612.5	104138		0.116764	1.19492	-0.696027	0.964521	-0.277165	0.849437	1.03258	0.836814	-3.50362	1.24651	0.345049	0.175861	1.08865	1.77954	1.38262	-3.01063	-0.878939	-1.57719	1.44259	-2.15587	-1.13554	-0.540672		0.499688	0.397859	0.498321
P02533	553571	363094	249603	464880	774657	262453	143325	186127	163706	1.39901e+06	121082	281763	116688	264782	286560	168387	95699.4	198692	264984	182967	926256	189958		1.13452	-0.0934713	-0.49213	0.441066	0.941667	-0.268768	-1.6694	-0.892909	-0.941152	1.87656	-1.84672	0.152785	-0.622105	0.888213	1.09954	-1.40119	-2.23369	-0.30815	0.723429	-0.407654	1.42182	-1.26504		0.499688	0.499255	0.499842
P02538	220848	60209.5	37396.3	72781.7	293106	74964.3	39143.2	34843.8	24914.1	192618	33630.1	40660.8	18694.1	34327.5	31040	36889.2	43895.9	44281.7	31330.6	32306.5	43225.9	42961.8		2.23935	-0.288483	-1.05958	0.0340805	1.63652	0.279429	-1.25028	-0.924448	-1.57409	1.29008	-1.33915	-0.395367	-0.876186	0.821543	0.552269	-1.27536	-1.00485	0.109519	0.174106	-0.436638	-1.04603	-1.57798		0.280449	0.499255	0.335775
P02545	22786	54561.9	51833.5	152861	71296.9	37304.5	83780.3	32835.7	37529.8	149968	71493.4	34219.9	34309.7	13637	12139.4	73316	68107	40271.9	15520.6	79988.9	7.74048e+06	7.95079e+06		-0.822464	-0.0654494	-0.0590183	1.5973	0.137658	-0.37523	0.325823	-0.675479	-0.438593	1.33486	0.190761	-0.221482	0.353497	-0.600497	-0.740637	0.172385	0.0646606	0.173937	-0.657882	1.17751	0.775028	0.469867		0.499688	0.499255	0.499842
P02743	76520.9	272157	81134.1	185176	70099.6	90886.5	131999	100470	56941.9	216579	122940	113093	64989.5	216356	83351.8	56550.1	78363.7	108801	111833	72477.6	107405	168427		-0.231552	1.08836	-0.719305	0.58093	-1.2701	-0.312908	-0.28101	-0.242362	-1.16659	0.618475	-0.257787	0.265725	0.0791705	2.51412	1.02669	-1.47373	-0.977188	0.519245	1.12923	-0.151033	0.392325	0.608145		0.499688	0.432212	0.487969
P02765	0	329.51	217.069	8132.61	238.208	167.218	658.865	148.892	1974.1	315.097	350.904	294.749	577.492	0	0	0	38.341	382.172	0	1.07428	NA	NA		NA	0.0315821	1.0767	4.12349	0.0098618	-0.794774	0.940868	0.51916	2.07038	-0.0139521	1.3564	0.227587	1.6096	NA	NA	NA	-2.71794	2.10965	NA	-9.11066	NA	NA		NA	0.499255	0.266983
P02768	175709	284036	307027	127575	349890	221381	280297	421734	143047	123965	343625	146702	180248	226975	168699	248440	272340	247287	198145	253588	2.00243e+07	2.59754e+07		-0.00766157	-0.112024	0.263626	-1.0373	0.254838	-0.106639	-0.233203	0.705952	-0.54914	-1.21474	0.0753033	-0.330452	0.451928	0.889693	0.650633	-0.391509	-0.221774	0.388168	0.638681	0.507853	-0.474013	-0.37206		0.499688	0.499255	0.499842
P02786	318298	305139	95177.9	153506	309925	498613	143660	81301.9	987003	82796.4	150141	811461	38342.6	14067.1	48425.1	75596.5	96933	34529.3	42354.6	57649.4	211683	143207		1.69239	1.07417	-0.637759	0.140606	0.805854	2.03738	-0.325379	-0.75129	2.92224	-0.988114	-0.137273	3.02519	-0.901596	-1.82826	-0.0195088	-1.21727	-0.837999	-1.40859	-0.531994	-0.703201	0.824039	-0.169769		0.401946	0.432675	0.499842
P02790	344356	854626	282670	313602	287476	321342	345708	384627	165790	778280	252701	237978	226007	352011	200196	248655	194468	265897	387850	202997	NA	NA		0.440284	1.1686	-0.314538	-0.158074	-0.536473	0.0221986	-0.372596	0.178132	-0.908044	1.02198	-0.779521	-0.0899018	0.358902	1.29029	0.553606	-0.845027	-1.2031	0.110593	1.29009	-0.265762	NA	NA		0.499688	0.40823	0.499842
P03989	NA	NA	NA	NA	NA	NA	NA	NA	NA	NA	NA	NA	NA	NA	NA	NA	NA	NA	NA	NA	0	0		NA	NA	NA	NA	NA	NA	NA	NA	NA	NA	NA	NA	NA	NA	NA	NA	NA	NA	NA	NA	NA	NA		NA	NA	NA
P04035	199927	2011.67	233.543	995.137	862.455	3421.33	6905.58	468.99	152.035	994.461	44.5096	142.641	71.9788	2685.14	322.395	43.9833	33.1004	53.7779	81.552	3622.45	NA	NA		7.64103	1.79327	-1.01347	0.0343181	-0.103342	2.80008	3.41797	0.184702	-2.72781	0.672877	-3.8694	-2.67423	-2.44805	4.5588	0.859866	-4.13389	-4.90014	-2.90258	-1.13869	2.53506	NA	NA		7.28e-07	0.169012	0.356622
P04049	NA	NA	NA	NA	NA	NA	NA	NA	NA	NA	NA	NA	NA	NA	NA	NA	NA	NA	NA	NA	28778.5	115856		NA	NA	NA	NA	NA	NA	NA	NA	NA	NA	NA	NA	NA	NA	NA	NA	NA	NA	NA	NA	-0.893545	0.694613		NA	NA	NA
P04075	1.70327e+06	4.02902e+06	2.91608e+06	2.88832e+06	4.73055e+06	2.38901e+06	3.81312e+06	2.70967e+06	2.04272e+06	2.47091e+06	4.14185e+06	1.51112e+06	864223	679987	1.04996e+06	3.39146e+06	3.62533e+06	1.86426e+06	1.12062e+06	1.24417e+06	1.11525e+07	1.5763e+07		0.00566005	0.470893	0.256566	0.192849	0.800865	0.0472428	0.254455	0.0942135	0.235981	-0.111233	0.352844	-0.31644	-0.65984	-1.0928	-0.116964	0.154889	0.318461	-0.101316	-0.218335	-0.572199	-0.756424	-0.429375		0.499688	0.499255	0.499842
P04080	98161.3	164386	113026	197014	148558	98747.6	100168	133523	134449	139771	102386	70653.1	29600	11200.3	34794.3	85884.9	92786.5	62945.7	48535	57883.5	115787	126209		0.374453	0.570548	-0.000804056	0.900615	0.0676021	0.0433913	-0.462688	0.416183	0.337575	0.196649	-0.299997	-0.203461	-0.855106	-1.63565	-0.0260781	-0.622826	-0.496472	-0.0543341	0.128117	-0.246099	0.217377	-0.118501		0.499688	0.499255	0.499842
P04179	4557.3	0	0	0	0	192.253	8745.87	131.803	0	9254.54	26844.6	0	0	929.096	0	12521.5	10910.3	0	148.456	148.11	19210.8	26479.8		1.90552	NA	NA	NA	NA	-2.94127	1.11576	-3.33056	NA	2.42301	4.14868	NA	NA	0.378591	NA	2.78472	1.43188	NA	-2.73233	-3.02567	-0.849889	-0.970004		0.362848	NA	NA
P04181	259105	294175	359892	349090	308467	330735	406928	433407	183318	281517	318620	115832	220137	93046.6	79895.8	409112	368045	406760	83924.1	243263	445295	652834		0.3316	-0.0710328	0.380584	0.346307	-0.102333	0.40576	0.212939	0.694874	-0.453791	-0.182013	-0.0748937	-0.844604	0.65175	-0.327712	-0.466952	0.250798	0.100188	1.09086	-0.654611	0.346839	-0.150875	0.0884688		0.499688	0.499255	0.499842
P04259	449866	122646	76176.1	148256	597056	152702	79734.4	70976.7	50749.8	392361	68504.4	82825.8	38079.8	69924.9	63228.3	75143.1	89415.7	90201.6	63820.2	65808.2	0	0		2.23556	-0.274861	-0.941398	0.125093	1.86623	0.300749	-1.19213	-0.958335	-1.46719	1.36094	-1.30668	-0.345955	-0.919421	0.493214	0.34659	-1.22696	-0.960139	-0.00832978	0.0592468	-0.524367	NA	NA		0.281052	0.499255	0.386432
P04264	1.14641e+07	6.85966e+06	5.65634e+06	1.34081e+07	3.60992e+07	7.16195e+06	6.16741e+06	6.73649e+06	4.82353e+06	3.30607e+07	5.00936e+06	8.1649e+06	3.18123e+06	1.03651e+07	5.3188e+06	8.26532e+06	5.85761e+06	1.17422e+07	2.92975e+06	6.57497e+06	1.70702e+07	1.6692e+07		0.65904	-0.801009	-0.835923	0.369483	1.78464	-0.42703	-1.14953	-0.643293	-0.426447	1.67676	-1.47082	0.00191305	-0.952294	0.622956	0.0907713	-0.596265	-1.02557	0.425626	-0.984022	-0.299872	-0.485488	-0.5938		0.499688	0.499255	0.433996
P04350	189454	148513	183762	166557	178976	163505	283876	125497	93452.4	159974	169379	214479	136169	69434.6	42325.7	161191	167397	115963	69656.3	214466	0	0		0.682905	-0.23226	0.164886	0.0682076	-0.160437	0.168784	0.490083	-0.340496	-0.757625	-0.229876	-0.183255	0.861121	0.759533	0.185624	-0.534157	-0.316075	-0.257038	0.101119	-0.0733081	1.00539	NA	NA		0.499688	0.499255	0.499842
P04406	5.38505e+06	2.15224e+07	1.26622e+07	1.1058e+07	2.01153e+07	1.21962e+07	1.84959e+07	1.46988e+07	6.08352e+06	1.44923e+07	3.07772e+07	4.01125e+06	2.85345e+06	4.04293e+06	2.66683e+06	2.39503e+07	2.24417e+07	1.14818e+07	3.93905e+06	6.01917e+06	1.22998e+07	2.15717e+07		-0.558093	0.816519	0.279208	-0.00253282	0.834509	0.277974	0.397536	0.431014	-0.153829	0.366813	1.14438	-1.14862	-1.21209	-0.885192	-1.03294	0.903113	0.891295	0.295197	-0.639507	-0.52556	-1.21096	-0.441077		0.499688	0.497436	0.499842
P04439	128981	50066	81547.4	59706.4	92438.9	127816	97294.9	53249.9	84726.8	44077.2	63357.1	347892	61587.1	39205.8	36920.7	66032.3	68021.4	58100	30372	88522.9	3.17529e+06	1.20285e+06		1.13359	-0.823588	-0.0608998	-0.460029	-0.17702	0.807341	-0.106052	-0.592049	0.078466	-1.13158	-0.626867	2.56543	0.590864	0.443635	0.343132	-0.62397	-0.572308	0.137154	-0.251694	0.713928	2.49957	0.663657		0.499688	0.497436	0.499842
P04632	NA	NA	NA	NA	NA	NA	NA	NA	NA	NA	NA	NA	NA	NA	NA	NA	NA	NA	NA	NA	51563.5	46364.4		NA	NA	NA	NA	NA	NA	NA	NA	NA	NA	NA	NA	NA	NA	NA	NA	NA	NA	NA	NA	0.015353	-0.798639		NA	NA	NA
P04637	6016.47	12558.7	16351.9	4400.22	32009.6	11718.5	17866.5	20167.2	24213.4	21753.6	26258.5	19189.9	15067.5	7412.89	5026.69	17444.1	31639.3	7738.92	13347.9	15537.8	338798	387018		-1.16811	-0.697421	-0.473356	-2.26911	0.0810419	-0.579336	-0.601389	0.236551	0.158922	-0.119402	0.172136	0.333738	0.767112	0.64293	0.0333056	-0.572842	0.314451	-0.523696	1.03941	0.351149	2.2439	1.83089		0.474751	0.499255	0.499842
P04792	0	0	0	1677.05	0	0	0	0	1587.85	112003	6189.98	0	0	0	1377.86	0	5956.8	3222.82	5832.82	2002.23	NA	NA		NA	NA	NA	-1.7269	NA	NA	NA	NA	-1.86882	3.71166	0.371863	NA	NA	NA	0.530475	NA	0.00489219	0.349897	2.38987	-1.7535	NA	NA		NA	NA	NA
P04818	1334.89	90795	7250.37	4202.75	3831.21	20549.8	79609	51985.1	744.49	33617.1	1180.88	1774.53	973.951	361.057	1762.37	8508.15	428.651	0	0	549.142	148324	92068.9		-0.90612	3.84699	-0.0702877	-0.843397	-0.495792	1.83508	3.21449	3.33734	-2.47431	2.09326	-2.83234	-1.67386	-1.77075	-1.19665	0.168148	-0.0660205	-3.51571	NA	NA	-2.10332	0.833459	-0.478689		0.499688	9.56e-05	0.499842
P04843	1.06382e+06	707988	771477	1.81681e+06	751001	663818	883523	666150	1.37454e+06	580406	934815	1.07336e+06	661845	441835	403417	1.16581e+06	959392	607264	398797	757413	985188	2.43286e+06		0.747045	-0.683825	-0.293929	0.985283	-0.536301	-0.402007	-0.453125	-0.544458	0.894049	-0.844828	-0.367532	0.70057	0.457876	-0.0572893	0.0134954	-0.0194282	-0.274821	-0.208486	-0.25213	0.207342	-0.738147	0.324512		0.499688	0.499255	0.499842
P04844	107117	154602	155657	248066	255140	83801.3	280859	123383	274075	266786	172989	162101	99484.8	58414.9	39203.7	270027	286292	109806	36185.9	151807	173653	533692		-0.299502	-0.295411	-0.20717	0.53602	0.248176	-0.952825	0.343587	-0.486912	0.73285	0.410449	-0.274841	0.309558	0.156789	-0.206782	-0.771033	0.331432	0.420655	-0.1093	-1.17512	0.351743	-0.620301	0.702556		0.499688	0.499255	0.499842
P05023	731959	488462	558595	786306	586377	412021	1.13721e+06	329791	589501	988729	663080	804703	638687	96773.6	215846	4.25699e+06	948993	474506	212866	813092	646595	1.03805e+06		0.706401	-0.648398	-0.210838	0.300678	-0.354941	-0.541223	0.481015	-1.00448	0.151263	0.488017	-0.287705	0.83975	0.973112	-1.66832	-0.305725	2.4667	0.256069	0.0235737	-0.58774	0.876328	-0.689813	-0.293912		0.499688	0.499255	0.499842
P05026	NA	NA	NA	NA	NA	NA	NA	NA	NA	NA	NA	NA	NA	NA	NA	NA	NA	NA	NA	NA	105122	81157.3		NA	NA	NA	NA	NA	NA	NA	NA	NA	NA	NA	NA	NA	NA	NA	NA	NA	NA	NA	NA	-0.714488	-1.61745		NA	NA	NA
P05091	15212.4	43404.2	42509.2	104431	69558.9	24826.9	52385	39146.5	133629	131493	97967.1	35245.5	17986.7	18583.2	6625.69	113098	172303	73167.2	8933.19	50831.3	101829	49175.8		-1.54253	-0.590989	-0.714475	0.750772	-0.359972	-1.17549	-0.651823	-0.556856	1.08574	0.893516	0.425411	-0.431587	-0.734797	0.173827	-1.49247	0.553704	1.19015	1.06731	-1.46904	0.432509	0.807729	-0.826525		0.362848	0.499255	0.488233
P05109	151.82	0	28.5174	0	574115	0	478.937	0	81.7223	40195.1	0	0	0	36.9492	0	0	0	1546.9	0	0	NA	NA		-3.04752	NA	-4.80917	NA	9.00122	NA	-0.900759	NA	-3.95115	5.29452	NA	NA	NA	-2.24524	NA	NA	NA	1.03191	NA	NA	NA	NA		0.0377859	NA	4.08e-10
P05114	NA	NA	NA	NA	NA	NA	NA	NA	NA	NA	NA	NA	NA	NA	NA	NA	NA	NA	NA	NA	0	0		NA	NA	NA	NA	NA	NA	NA	NA	NA	NA	NA	NA	NA	NA	NA	NA	NA	NA	NA	NA	NA	NA		NA	NA	NA
P05141	2.18523e+06	1.46874e+06	2.44894e+06	1.70108e+06	1.90756e+06	1.39385e+06	2.32417e+06	1.33155e+06	1.03334e+06	2.70984e+06	1.09013e+06	631762	740616	356088	384834	2.35751e+06	1.67044e+06	564025	553313	1.21639e+06	1.7733e+06	8.19274e+06		1.28275	-0.171532	0.866779	0.310554	0.299656	0.133266	0.421375	-0.088208	-0.0217264	0.896147	-0.73453	-0.672997	0.0494372	-1.04227	-0.677119	0.475468	0.0109993	-0.936739	-0.352539	0.339397	-1.26969	0.760238		0.496595	0.499255	0.382631
P05198	37841.3	110740	125526	85865.8	174607	85004	172699	117794	128905	62499.5	99807.5	37429.3	9005.42	3501.17	16742.8	84232.2	96787.1	17842.1	7755.6	42487.6	45000.6	126164		-0.27981	0.723716	0.848048	0.385756	0.972038	0.571946	1.06392	0.993212	0.977216	-0.278708	0.385057	-0.412899	-1.85744	-2.47039	-0.261487	0.0589375	0.277451	-1.13766	-1.79801	0.0762952	-1.2422	-0.230877		0.499688	0.499255	0.394396
P05204	67932.7	553822	109715	265981	424326	187380	129963	74437.1	162639	264486	133585	49426.9	22526.4	24417	40118.4	107488	197171	52375.1	46917.9	47801.2	78075.7	131994		-0.368575	2.19775	-0.189807	1.19494	1.50958	0.818013	-0.237833	-0.645712	0.476015	0.97648	-0.0744172	-0.901521	-1.45607	-0.770287	-0.0622795	-0.456942	0.455117	-0.551643	-0.142713	-0.744927	-1.195	-0.826562		0.499688	0.0674888	0.499842
P05386	3.09363e+06	7.79331e+06	6.69188e+06	6.47748e+06	6.5324e+06	4.55208e+06	6.06391e+06	5.06517e+06	5.54875e+06	4.87824e+06	8.77085e+06	6.16997e+06	2.82668e+06	2.90184e+06	1.96969e+06	9.46981e+06	5.92413e+06	4.4567e+06	3.6719e+06	3.7278e+06	1.73459e+07	2.08383e+07		-0.371098	0.248179	0.279091	0.163925	0.0856883	-0.220997	-0.290438	-0.192977	0.577084	-0.309903	0.241338	0.506852	-0.182235	-0.269691	-0.453113	0.471381	-0.153337	-0.0768511	0.281986	-0.215579	0.111032	0.250897		0.499688	0.499255	0.499842
P05387	2.00542e+06	5.83703e+06	4.24498e+06	3.35316e+06	4.10705e+06	3.45475e+06	5.76669e+06	4.32393e+06	3.27475e+06	4.95466e+06	5.94486e+06	3.09179e+06	2.07535e+06	2.22589e+06	1.28348e+06	6.00277e+06	4.62786e+06	3.43636e+06	1.94265e+06	2.75804e+06	1.47876e+07	1.23441e+07		-0.491556	0.299794	0.0897607	-0.316409	-0.129805	-0.133697	0.13746	0.0631047	0.233714	0.198799	0.160661	0.00638144	-0.102431	-0.088929	-0.560243	0.279883	-0.0401258	0.0669091	-0.139305	-0.132032	0.536195	0.095405		0.499688	0.499255	0.499842
P05388	892208	1.76456e+06	1.63126e+06	1.71641e+06	1.86908e+06	1.38513e+06	1.89257e+06	1.75243e+06	1.1727e+06	2.03634e+06	2.00101e+06	1.04801e+06	654865	588600	643398	3.13625e+06	2.2981e+06	986013	1.05609e+06	851814	2.838e+06	3.13281e+06		-0.294498	-0.143215	0.0177439	0.078505	0.0250397	-0.12099	-0.129367	0.0755572	-0.0755244	0.226455	-0.0765663	-0.165798	-0.379105	-0.542386	-0.158682	0.655707	0.241607	-0.352243	0.363708	-0.436341	-0.103487	-0.202259		0.499688	0.499255	0.499842
P05455	322254	515150	457008	393991	500495	397677	543850	358833	456532	371956	608069	373075	216717	116398	107609	619907	582701	319734	141828	226017	2.20044e+06	1.15754e+06		0.143552	0.151917	0.18716	-0.0368222	0.0906329	0.110607	0.082181	-0.162387	0.432788	-0.291954	0.29915	0.380538	0.0662168	-0.64221	-0.619622	0.298606	0.223566	0.149432	-0.466732	-0.327328	0.914891	-0.362032		0.499688	0.499255	0.499842
P05556	24426.1	19979.8	37185.9	37985.1	33245.1	25977.6	38102.2	27940.1	41667.1	25298.1	47198.4	167431	14163.7	5215.29	4952.97	31123.4	46619.2	30313.5	8635.02	15722.7	35067.6	18105.8		0.19525	-0.73177	0.0240255	0.218678	-0.579866	-0.117484	-0.196344	-0.0102613	0.248907	-0.616165	0.319123	2.83497	-0.0500768	-0.60666	-0.726455	-0.432161	0.169177	0.783521	-0.34861	-0.349412	0.262958	-1.33193		0.499688	0.499255	0.499842
P05783	65106.8	58649.9	95216	62785.5	102399	63868.4	78807.6	62972.3	84285	170885	114853	78443.9	52070.1	44715.6	43805.1	68215.5	133409	44735	43047.5	88499.8	888923	1.1442e+06		-0.00571769	-0.707315	0.0593562	-0.497515	-0.129559	-0.340889	-0.534173	-0.462158	-0.0371764	0.767485	0.140722	0.235992	0.22078	0.496811	0.464957	-0.692785	0.3113	-0.381976	0.139073	0.589094	0.566522	0.562182		0.499688	0.499255	0.499842
P05787	607768	314863	264938	405382	199783	229407	470238	253823	299039	351851	600359	329461	170734	70010.1	80241.8	390272	380592	216764	80104.1	188356	1.54223e+06	2.33525e+06		1.51747	-0.13024	-0.183324	0.445887	-0.839534	-0.263764	0.308683	-0.230226	0.231345	0.0596294	0.727809	0.630608	0.154406	-0.940539	-0.607535	0.0532761	0.0313329	0.0170793	-0.867289	-0.15554	-0.164838	0.128312		0.445859	0.499255	0.499842
P06280	23428.5	34889.6	42352	77440.5	59471.5	35398.4	396475	46148.2	61571.4	57385.2	84298.9	92648.8	28114.8	13731.8	35140.1	58605.8	56817.1	23961.7	13954.7	27367.7	0	3558.52		-0.75601	-0.795708	-0.668339	0.401091	-0.579684	-0.541055	2.41284	-0.17115	-0.0376928	-0.277194	0.291492	1.0758	0.0757181	-0.062685	1.26138	-0.368203	-0.417214	-0.456367	-0.567539	-0.399431	NA	-2.24208		0.499688	0.499255	0.499842
P06454	348144	2.16064e+06	1.14956e+06	1.75819e+06	1.60686e+06	1.59512e+06	1.62342e+06	1.13715e+06	765556	2.08199e+06	2.6945e+06	1.13526e+06	504509	460287	368439	1.87252e+06	2.14116e+06	1.153e+06	255639	535680	1.39867e+06	2.01021e+06		-1.28485	0.571041	-0.0919909	0.532404	0.20904	0.503135	0.0576829	-0.153619	-0.320527	0.670513	0.786814	0.374474	-0.348902	-0.468062	-0.561497	0.298038	0.542484	0.308813	-1.328	-0.706992	-1.27575	-0.992365		0.436445	0.499255	0.499842
P06493	405172	525310	556159	470916	766574	581824	856018	651858	529683	699510	624214	386031	187865	195098	206377	579598	659419	1.4569e+06	226238	299143	611896	924271		0.0501677	-0.289021	0.0239861	-0.223905	0.278281	0.216493	0.299615	0.259013	0.218757	0.204598	-0.128386	-0.0159282	-0.604819	-0.359789	-0.11986	-0.258716	-0.0469051	1.94124	-0.243256	-0.368698	-0.723808	-0.424956		0.499688	0.499255	0.499842
P06576	776527	2.62054e+06	2.07365e+06	2.17351e+06	3.12749e+06	2.15418e+06	2.58884e+06	2.20206e+06	1.18958e+06	2.04652e+06	2.98361e+06	831818	577046	326011	328777	2.88339e+06	2.80253e+06	1.11113e+06	389007	819013	3.89428e+06	4.93653e+06		-0.374713	0.572231	0.501986	0.552581	0.91981	0.661498	0.460713	0.541178	0.0867328	0.36089	0.640073	-0.389458	-0.445354	-1.311	-1.03831	0.658638	0.666976	-0.0569148	-0.999502	-0.374032	-0.437095	-0.324184		0.499688	0.499255	0.499842
P06702	14.0449	1744.37	1558.85	137.936	214430	0	6484.17	614.665	1259.66	13873.8	1449.49	849.176	415.578	82.448	2019.28	687.259	1199.34	160.159	994.768	690.351	NA	NA		-7.50036	0.41194	0.506647	-2.91881	7.0333	NA	2.07923	-0.625926	-0.608086	3.42146	0.142894	-0.897437	-0.869779	-1.91193	2.62529	-1.22284	-0.644825	-2.4193	1.47334	-0.909406	NA	NA		1.29e-10	0.499255	0.499842
P06730	70084.2	83992.5	90463.2	59153.7	117256	76517.3	109947	78806.8	80020.3	85863.2	75954.4	41981.7	34735.6	19634.4	17775.3	67420.2	67606.4	41568.8	34451.4	44421.8	97474.6	281809		0.485518	0.178107	0.262218	-0.289853	0.301267	0.272273	0.276353	0.244252	0.161651	0.0736725	-0.141938	-0.373313	-0.00381056	-0.152697	-0.391524	-0.382698	-0.366815	-0.0506494	0.240096	-0.0211716	-0.998144	0.0999969		0.499688	0.499255	0.499842
P06732	NA	NA	NA	NA	NA	NA	NA	NA	NA	NA	NA	NA	NA	NA	NA	NA	NA	NA	NA	NA	2902.06	6468.69		NA	NA	NA	NA	NA	NA	NA	NA	NA	NA	NA	NA	NA	NA	NA	NA	NA	NA	NA	NA	-0.429489	0.25425		NA	NA	NA
P06733	1.51737e+07	3.38421e+07	1.93895e+07	2.86402e+07	2.26718e+07	1.94095e+07	2.74938e+07	2.15483e+07	1.38272e+07	3.23258e+07	2.37256e+07	1.15928e+07	1.26467e+07	1.64284e+07	1.2527e+07	2.38601e+07	2.46212e+07	1.70903e+07	1.49212e+07	2.58352e+07	1.78676e+07	2.54172e+07		-0.135097	0.431055	-0.143641	0.354575	-0.0155207	-0.114426	-0.0850151	-0.0822617	0.0558003	0.516921	-0.300213	-0.673518	-0.143311	0.00867427	0.123511	-0.138289	0.00643406	-0.241494	0.208102	0.529733	-1.03315	-0.531799		0.499688	0.499255	0.499842
P06737	NA	NA	NA	NA	NA	NA	NA	NA	NA	NA	NA	NA	NA	NA	NA	NA	NA	NA	NA	NA	2381.81	14951.1		NA	NA	NA	NA	NA	NA	NA	NA	NA	NA	NA	NA	NA	NA	NA	NA	NA	NA	NA	NA	-2.37162	-0.0587843		NA	NA	NA
P06744	1.47358e+06	3.70546e+06	4.03848e+06	3.11308e+06	4.99954e+06	1.9353e+06	2.84482e+06	2.03809e+06	1.97061e+06	2.17332e+06	4.13379e+06	480377	258470	201338	333674	3.71019e+06	3.83646e+06	1.18407e+06	191054	678839	4.22845e+06	4.20698e+06		0.429826	0.942378	1.34751	0.934746	1.4743	0.353392	0.449732	0.278593	0.71105	0.304054	0.973081	-1.36334	-1.7949	-2.19675	-1.1723	0.888804	0.992285	-0.121121	-2.20985	-0.810012	-0.696033	-0.935642		0.499688	0.452729	0.134623
P06748	5.18806e+06	1.13218e+07	9.59409e+06	1.1705e+07	1.05717e+07	7.47099e+06	9.3314e+06	7.51216e+06	8.10786e+06	8.52392e+06	1.55614e+07	9.85484e+06	4.89394e+06	8.3527e+06	4.79682e+06	1.6535e+07	1.90203e+07	1.18497e+07	4.8143e+06	6.94089e+06	1.66528e+07	1.50479e+07		-0.391561	0.0518433	0.058942	0.279993	0.0582908	-0.249202	-0.417534	-0.367808	0.428672	-0.232868	0.329394	0.411773	-0.17138	0.463345	0.073073	0.5443	0.831609	0.577339	-0.110401	-0.0867114	0.192111	-0.0550469		0.499688	0.499255	0.499842
P06753	173904	755040	135059	1.32041e+06	159090	76887.9	87126.9	62862.4	52626.6	759960	217796	78939.9	14111.5	41615.7	20326.8	173895	109560	109339	53948.8	93094.1	4.14384e+06	998415		0.797609	2.43536	-0.0258492	3.40413	-0.0536838	-0.697001	-1.01437	-1.10976	-1.31514	2.35076	0.44403	-0.371602	-2.36961	-0.373707	-1.39386	0.0551451	-0.630723	0.241433	-0.218548	-0.00320089	2.50737	0.0530358		0.499688	0.0347781	0.499842
P06865	NA	NA	NA	NA	NA	NA	NA	NA	NA	NA	NA	NA	NA	NA	NA	NA	NA	NA	NA	NA	604.325	2428.89		NA	NA	NA	NA	NA	NA	NA	NA	NA	NA	NA	NA	NA	NA	NA	NA	NA	NA	NA	NA	-1.33419	-0.796706		NA	NA	NA
P07099	44797	34069.6	47756.6	129345	56018.8	7743.56	35084.3	38398.9	40202.1	30930.6	47757.1	42997.1	421974	8123.41	42605.6	81879.7	51005.1	53786.7	37368.1	305832	NA	NA		-0.0175905	-1.02835	-0.583181	1.02103	-0.716329	-3.02076	-1.31138	-0.668627	-0.756322	-1.33005	-0.70579	-0.198615	3.9318	-1.22029	1.15883	0.0324755	-0.67051	0.524988	0.565902	3.06501	NA	NA		0.499688	0.43458	0.499842
P07195	1.85542e+06	3.65148e+06	3.15429e+06	2.32999e+06	3.77659e+06	2.65799e+06	3.24624e+06	2.6686e+06	2.33413e+06	2.22556e+06	3.79999e+06	907467	676437	691152	844154	3.34358e+06	3.0691e+06	1.66811e+06	763619	983333	3.132e+06	3.70457e+06		0.316989	0.47037	0.527975	0.0464022	0.60788	0.371227	0.189304	0.227148	0.528073	-0.112461	0.391673	-0.878519	-0.824143	-0.832805	-0.251204	0.28349	0.212245	-0.0734353	-0.606022	-0.720969	-0.727552	-0.702173		0.499688	0.499255	0.499842
P07205	0	0	0	0	0	0	0	0	0	0	0	0	0	0	0	0	0	0	0	0	0	0		NA	NA	NA	NA	NA	NA	NA	NA	NA	NA	NA	NA	NA	NA	NA	NA	NA	NA	NA	NA	NA	NA		NA	NA	NA
P07237	538680	909085	850136	1.62607e+06	1.01946e+06	598197	999914	587331	565539	746221	795394	352185	159282	106443	145274	724256	783204	271947	228817	269044	2.32504e+06	2.94343e+06		0.406724	0.39224	0.54352	1.51465	0.6062	0.139585	0.421549	-0.0283888	0.242146	0.212865	0.100088	-0.259218	-0.965117	-1.43805	-0.786772	-0.0367582	0.107714	-0.690072	-0.369772	-0.639867	-0.0611472	-0.00575574		0.499688	0.499255	0.499842
P07339	15942.1	36759.1	20410.4	17662.6	338538	16503.1	43232.5	22863.1	16877.6	49918	50944.1	9807.81	3693.64	3422.42	2255.77	30037	43833.1	12807.7	2144.7	12524.5	9047.82	26908.1		0.119333	0.773746	-0.264093	-0.364346	3.43573	-0.206543	0.577956	0.33425	-0.536054	0.97424	1.0384	-0.808554	-1.45876	-0.616401	-1.22983	0.0935643	0.658089	0.0882411	-1.73545	-0.133161	-1.52081	-0.50448		0.499688	0.499255	0.499842
P07355	207387	141183	162671	172682	246056	144368	300897	169027	198548	216303	205670	61184.3	85275.5	97524.8	47120.9	178246	210676	136936	72432.7	115260	1.60352e+06	1.45465e+06		0.655413	-0.489894	-0.144324	-0.0365955	0.212855	-0.166498	0.42423	-0.0452283	0.30136	0.0810121	-0.060092	-1.14292	-0.0996643	0.426617	-0.581992	-0.32151	-0.0688	0.141012	-0.206874	-0.101433	0.835509	0.360707		0.499688	0.499255	0.499842
P07437	5.48366e+07	5.59357e+07	5.64812e+07	7.61583e+07	5.63848e+07	5.42239e+07	8.6261e+07	4.16733e+07	3.57444e+07	6.00516e+07	5.77409e+07	6.76309e+07	4.94663e+07	2.76674e+07	1.75518e+07	5.73153e+07	5.77087e+07	4.37186e+07	2.64117e+07	6.63899e+07	6.9784e+07	1.30618e+08		0.343551	-0.151715	0.117236	0.487067	0.0612743	0.0316912	0.270082	-0.480669	0.158481	0.144828	-0.280482	0.57076	0.427124	-0.70297	-0.844049	-0.0881036	0.0359117	-0.244047	-0.377785	0.540644	-0.476282	0.467596		0.499688	0.499255	0.499842
P07602	3432.62	28592.6	5896.32	29766.1	9908.62	10210.6	24846	26369	2997.34	11890.9	0	5364.38	2209.6	0	1678.51	18900.6	43533.6	27283.5	0	9118.48	NA	NA		-1.58153	1.12451	-0.372557	1.07374	-0.105643	-0.233583	0.463567	1.32951	-2.49798	0.565177	NA	-1.06634	-1.59492	NA	0.119922	0.106168	1.34723	1.92016	NA	1.08627	NA	NA		0.357914	0.422108	0.499842
P07737	1.04097e+06	4.13415e+06	2.42445e+06	3.27609e+06	3.72849e+06	2.69399e+06	3.74807e+06	3.46638e+06	1.62389e+06	3.09769e+06	4.12849e+06	983043	902850	900611	826479	3.93552e+06	4.58654e+06	1.80385e+06	1.19937e+06	1.38644e+06	1.00189e+07	9.90134e+06		-0.677082	0.539674	0.0161207	0.422313	0.475311	0.265263	0.271825	0.49549	-0.0974381	0.259236	0.387633	-0.902313	-0.538119	-0.601844	-0.421095	0.408661	0.697335	-0.0983347	-0.0686048	-0.355165	-0.00613356	-0.228854		0.499688	0.499255	0.499842
P07741	NA	NA	NA	NA	NA	NA	NA	NA	NA	NA	NA	NA	NA	NA	NA	NA	NA	NA	NA	NA	17636.5	70506.6		NA	NA	NA	NA	NA	NA	NA	NA	NA	NA	NA	NA	NA	NA	NA	NA	NA	NA	NA	NA	-2.31234	-0.701198		NA	NA	NA
P07814	472556	633452	618779	719237	759269	785702	1.23884e+06	876549	688403	875098	1.23342e+06	804082	613695	480624	298798	946047	944298	728854	369404	487128	1.11484e+06	1.12609e+06		-0.281199	-0.621304	-0.410764	-0.18166	-0.317155	0.0651195	0.257516	0.0907553	0.0427099	-0.0373938	0.276892	0.487663	0.560844	0.341668	-0.185342	-0.121957	-0.0994271	0.302272	-0.130688	-0.238159	0.386484	0.100122		0.499688	0.499255	0.499842
P07858	365.971	1082.02	3093.97	5073.65	7498.74	2424.94	25822.2	1474.25	1421.44	9654.46	14221.7	1271.5	12782.3	3093.62	55.3636	10357.5	12744.2	6324.74	423.564	37792.4	NA	NA		-3.5487	-1.88562	-0.256464	0.103081	0.375854	-0.43676	2.49601	-0.946251	-1.85027	1.21965	1.92729	-1.52436	2.85308	1.93604	-4.19148	1.22714	1.36342	1.55657	-1.4003	3.85564	NA	NA		0.0101895	0.127052	0.499842
P07900	3.95134e+06	1.01217e+07	8.63126e+06	9.90604e+06	1.32002e+07	8.96259e+06	1.29924e+07	1.02446e+07	5.26834e+06	1.09074e+07	1.55295e+07	5.98218e+06	5.40973e+06	2.98283e+06	3.51523e+06	1.33983e+07	1.67613e+07	6.58932e+06	3.9205e+06	6.75001e+06	2.27697e+07	2.52874e+07		-0.686246	0.0084997	0.0241019	0.151764	0.515815	0.140505	0.193091	0.213705	-0.0742829	0.257487	0.445724	-0.221159	0.0816462	-0.977432	-0.282897	0.353681	0.7681	-0.190616	-0.308665	-0.0200041	-0.198817	-0.126272		0.499688	0.499255	0.499842
P07910	68755	188545	134691	155924	191458	186202	169540	151904	99320.5	153105	244516	181347	24947.9	48837.5	35909.7	175044	157306	46905.4	30076.2	78434.6	530454	607380		-0.448585	0.510317	0.0827021	0.353122	0.323444	0.742925	0.100309	0.331446	-0.275205	0.0925955	0.749648	0.982853	-1.39176	0.0479804	-0.384965	0.195585	0.0393572	-0.859388	-0.936206	-0.119479	0.059783	-0.0909043		0.499688	0.499255	0.499842
P07942	NA	NA	NA	NA	NA	NA	NA	NA	NA	NA	NA	NA	NA	NA	NA	NA	NA	NA	NA	NA	42827.8	31939.9		NA	NA	NA	NA	NA	NA	NA	NA	NA	NA	NA	NA	NA	NA	NA	NA	NA	NA	NA	NA	1.97918	0.877291		NA	NA	NA
P07951	NA	NA	NA	NA	NA	NA	NA	NA	NA	NA	NA	NA	NA	NA	NA	NA	NA	NA	NA	NA	0	0		NA	NA	NA	NA	NA	NA	NA	NA	NA	NA	NA	NA	NA	NA	NA	NA	NA	NA	NA	NA	NA	NA		NA	NA	NA
P08047	NA	NA	NA	NA	NA	NA	NA	NA	NA	NA	NA	NA	NA	NA	NA	NA	NA	NA	NA	NA	9863.48	39359.8		NA	NA	NA	NA	NA	NA	NA	NA	NA	NA	NA	NA	NA	NA	NA	NA	NA	NA	NA	NA	1.12177	1.60465		NA	NA	NA
P08123	25782.5	50223.1	24635	60048.5	32718.1	35950.7	29947.8	31020.5	28307.4	75978.6	36035.7	27859.9	19835.4	31526.9	16580.2	16852.1	16439.7	26420	21931.8	15451.2	101623	117280		0.162431	0.523562	-0.686443	0.806498	-0.669148	0.265223	-0.642322	0.00830684	-0.396975	0.928629	-0.192375	0.0747983	0.329864	1.94578	0.893415	-1.43302	-1.47233	0.467098	0.856388	-0.462303	0.746592	0.359559		0.499688	0.499255	0.498718
P08133	16421.8	94169.6	33969.4	36644.1	101284	14868	49045.6	50895.5	33382.2	98053	68282.1	12394.9	17922	17770.8	9607.03	102208	72365.4	30696.3	21683	28042.2	19438.6	28558.3		-0.942947	1.02997	-0.61667	-0.348764	0.616584	-1.47102	-0.314627	0.309744	-0.550839	0.897581	0.339264	-1.54145	-0.256921	0.643056	-0.391193	0.838917	0.327088	0.258673	0.373775	0.00804993	-1.56087	-1.57035		0.499688	0.43458	0.499842
P08134	77771.9	97987.2	74690.3	87754.9	99242.8	50574.8	64252.4	66198.9	59341.8	67969.1	87488.5	30332.4	21245.2	4529.4	17127.5	74275.9	70911.1	50995.8	17470.7	21015.7	NA	NA		0.972757	0.716011	0.22676	0.583147	0.275141	-0.0359695	-0.256865	0.310053	-0.0304526	0.00178404	0.352324	-0.576873	-0.417282	-1.90445	-0.0276829	0.0248803	-0.034804	0.609916	-0.409371	-0.815928	NA	NA		0.499688	0.499255	0.499842
P08195	9467.53	7763.02	27044.3	27353	138115	107103	27192.5	9630.57	44240.6	8479.47	27348.1	38157.9	1273.42	0	367.22	15735.2	48044.7	8779.07	0	164.901	1509.03	7756.15		-0.269145	-1.03222	0.700377	0.718133	2.61636	3.09392	0.40722	-0.364664	1.36535	-1.17216	0.66521	1.68259	-1.56345	NA	-3.36873	-0.349555	1.27342	-0.0158047	NA	-5.13322	-1.74408	-0.933738		0.499688	0.43458	0.467271
P08237	25857.5	28974.9	22454.1	18899.2	35928.4	24185.8	9577.34	9673	4799.58	5516.22	3253.89	11893.5	9923.22	9171.34	2010.11	26700.7	4653.45	5981.83	2061.64	15930.9	11177.4	21692.8		1.53215	1.22379	0.707361	0.464973	0.892329	1.16051	-0.856484	0.960065	-1.64866	-1.51688	-2.21744	0.237479	0.762691	1.68318	0.494554	0.727436	-0.877804	-0.28723	-0.908526	0.951133	-0.704183	-0.316467		0.445209	0.384006	0.464298
P08238	5.85516e+06	1.39121e+07	1.11957e+07	1.34482e+07	1.63463e+07	1.20375e+07	1.55383e+07	1.2453e+07	7.4075e+06	1.29875e+07	1.83831e+07	7.13042e+06	9.4243e+06	4.1598e+06	4.65237e+06	1.4504e+07	1.79823e+07	8.8967e+06	5.46201e+06	9.23666e+06	3.4943e+07	3.98897e+07		-0.522793	0.0921254	0.0210843	0.212076	0.457086	0.178088	0.0589256	0.104459	0.0790791	0.130666	0.300522	-0.380911	0.468652	-0.953255	-0.300336	0.0837978	0.491823	-0.178924	-0.246966	0.0214365	-0.150601	-0.00680428		0.499688	0.499255	0.499842
P08240	61493.5	49721.7	97678.7	79738.3	96138.1	47944.1	60899.6	41500.5	47357.7	59009.2	38563.9	70749.8	57884.4	19035.8	25210.5	96088.2	79372.3	37908.5	19863.3	42152.8	95366.5	222207		0.469191	-0.454875	0.460704	0.283031	0.0600406	-0.262061	-0.491133	-0.537103	-0.521746	-0.364077	-1.02735	0.540751	0.936958	0.13465	0.422662	0.246871	-0.0274889	0.0189731	-0.350233	0.0869971	0.703249	1.41511		0.499688	0.499255	0.499842
P08243	80400.5	160971	133592	201879	193887	101635	115240	117605	181564	150786	190467	55737.1	20237.7	22196.6	35238.1	258846	282856	58194.1	32179.4	47135.1	484528	427499		-0.0611274	0.429842	0.233455	0.896043	0.509176	0.000717414	-0.31514	0.107721	0.789838	0.22786	0.533914	-0.611394	-1.54667	-0.986934	-0.26777	0.934366	1.06832	-0.391352	-0.686428	-0.723566	-0.726087	-1.25826		0.499688	0.499255	0.499842
P08254	0	0	0	0	0	0	0	0	0	0	0	0	0	0	0	0	0	0	0	0	0	0		NA	NA	NA	NA	NA	NA	NA	NA	NA	NA	NA	NA	NA	NA	NA	NA	NA	NA	NA	NA	NA	NA		NA	NA	NA
P08559	52036	111446	141540	119284	149944	134388	167175	159496	106108	121114	154056	74177	58374.5	40158.6	28577	125410	100737	69045.2	36153.8	49047.1	215275	317458		-0.52573	0.050258	0.423227	0.236505	0.193416	0.560757	0.372764	0.726896	0.0742006	0.0512642	0.374666	-0.0618169	0.199671	0.219273	-0.322626	0.00938883	-0.306727	0.102204	-0.288412	-0.465612	-0.10017	0.0596912		0.499688	0.499255	0.499842
P08572	15725	29643.9	7435.99	43141	14169.4	9906.54	12023.2	3253.54	1303.68	47591.8	8304.87	5131.06	1930.64	5901.52	485.04	2492.67	485.249	89.9166	2180.5	179.83	NA	NA		1.80632	2.62592	0.52351	2.90747	0.855618	1.20326	0.843084	-0.260608	-2.41023	3.11484	0.606845	0.181943	0.603869	3.46733	-0.306381	-1.4286	-4.04059	-5.33754	0.584522	-4.6151	NA	NA		0.377009	0.0197063	0.499842
P08579	1054.48	18253.5	12934	10345.2	22416.7	10057.5	8937.41	6752.05	17799.9	10760.3	13159.8	13601.4	323.191	0	469.362	9682.4	2014.79	0	272.025	0	NA	NA		-2.19708	2.02771	1.50176	0.868946	1.68014	1.35654	0.522983	0.972276	1.65336	1.00669	1.43658	1.76951	-3.04579	NA	-1.3028	0.749091	-1.78628	NA	-2.4525	NA	NA	NA		0.176452	0.0989174	0.0865853
P08621	172784	302286	272923	238020	328955	235837	423629	306092	305313	397470	432136	291971	304742	212185	84314.9	719933	493746	283890	152853	279137	1.27276e+06	1.02097e+06		-0.545042	-0.347861	-0.315911	-0.519923	-0.281668	-0.392241	-0.0188179	-0.11815	0.060376	0.0550443	0.0751918	0.2622	0.844772	0.563946	-0.695289	0.794322	0.245861	0.252031	-0.0673178	0.257724	0.808721	0.153037		0.499688	0.499255	0.499842
P08670	2.7052e+06	3.65488e+06	3.34407e+06	2.78365e+06	2.93822e+06	3.47555e+06	3.41129e+06	3.01403e+06	2.49852e+06	2.79287e+06	3.30574e+06	3.76707e+06	2.18791e+06	1.92553e+06	1.52569e+06	3.10393e+06	3.68522e+06	2.85059e+06	1.90631e+06	3.00733e+06	1.60587e+07	1.1421e+07		0.261455	-0.105123	0.0290353	-0.293897	-0.338537	0.173326	-0.343127	-0.178749	0.106236	-0.36027	-0.414285	0.609833	0.289132	0.0215967	0.00634594	-0.408086	-0.0880908	0.0978638	0.139694	0.307998	0.707118	0.0136764		0.499688	0.499255	0.499842
P08708	322177	1.0388e+06	755293	1.15031e+06	849558	906303	924689	880333	1.07399e+06	1.46026e+06	1.12615e+06	658623	274247	486573	369378	1.70628e+06	1.50059e+06	801354	431873	826838	2.27309e+06	3.49355e+06		-1.02422	-0.123493	-0.329666	0.29803	-0.354843	0.0545579	-0.389055	-0.139149	0.538667	0.527227	-0.105153	-0.0354022	-0.85999	0.0534108	-0.139516	0.544464	0.391893	0.1846	-0.146426	0.332926	-0.146782	0.219123		0.499688	0.499255	0.499842
P08727	82445.5	49069.4	86982.4	99883.5	73125.9	52818	68446.6	49168.6	99581.2	90270.8	98732.9	179340	78687.8	48302.7	71345.1	79213.4	77987.2	95895.6	75074.4	77559.3	485137	1.15825e+06		0.143887	-1.17128	-0.260621	0.00410924	-0.807654	-0.817179	-0.935421	-1.02827	0.0299003	-0.377166	-0.281053	1.27711	0.636366	0.381443	0.973731	-0.666249	-0.685263	0.539052	0.756183	0.188304	-0.335786	0.594088		0.499688	0.404496	0.499842
P08729	0	0	0	0	0	0	0	0	0	0	0	0	0	0	0	0	0	0	0	0	0	0		NA	NA	NA	NA	NA	NA	NA	NA	NA	NA	NA	NA	NA	NA	NA	NA	NA	NA	NA	NA	NA	NA		NA	NA	NA
P08754	65078.8	2891.69	4759.65	3149.14	4798.61	6341.37	14876.2	5544.54	26145.9	14779.7	59.4998	4353.53	14105.8	0.0243218	737.929	9429.08	47089.1	4957.28	1056.09	5860.26	531568	690195		4.71582	-0.419277	0.178058	-0.400706	-0.318521	0.953218	1.58236	0.873673	2.66733	1.73642	-6.39403	0.536878	3.08246	-14.6077	-0.250656	0.960735	3.32671	1.22921	-0.130603	1.26391	0.48484	0.274089		0.00555788	0.499255	0.499842
P08758	197422	172621	190414	226846	160225	98173.3	112730	148078	74734.9	171160	163635	195147	30240.3	21298.8	40798.8	226729	293896	77594.8	61886.6	44444.9	4.73098e+06	1.98629e+06		1.04504	0.284989	0.551706	0.838335	0.0312081	-0.274302	-0.571235	0.223411	-0.706924	0.194865	0.0702037	1.04181	-1.17703	-1.34824	-0.319342	0.504856	0.89334	-0.228599	0.0311304	-1.0505	1.86649	0.243977		0.499688	0.499255	0.499842
P08779	1.19298e+06	1.45302e+06	1.43573e+06	1.26657e+06	1.2381e+06	1.31497e+06	1.91785e+06	1.43294e+06	1.34197e+06	1.11714e+06	989669	1.28756e+06	816412	830671	1.09428e+06	950108	607728	821927	1.03528e+06	756061	693685	506980		0.419564	-0.121042	0.126404	-0.0566524	-0.294941	0.109971	0.196702	0.0884942	0.363097	-0.372136	-0.792009	0.464999	0.264983	0.36287	0.984891	-0.826744	-1.45482	-0.269934	0.658565	-0.299224	-0.452884	-1.19699		0.499688	0.499255	0.499842
P08865	788953	2.10064e+06	1.42694e+06	1.35996e+06	2.2692e+06	1.35996e+06	1.89932e+06	1.57908e+06	1.10335e+06	1.63116e+06	2.63151e+06	870356	636184	355084	338524	1.85152e+06	1.801e+06	876096	510758	829489	4.19305e+06	4.63588e+06		-0.165871	0.42809	0.130293	0.0454816	0.624797	0.164096	0.188671	0.232856	0.14049	0.208076	0.644736	-0.128008	-0.108724	-0.976234	-0.799138	0.182971	0.189526	-0.212557	-0.403631	-0.161999	-0.051655	-0.150377		0.499688	0.499255	0.499842
P08962	10214.1	20291.6	31334.1	26440.3	66500.7	32665.8	16084.8	17712.9	62436.7	2652.22	29591.3	293172	6529.69	1023.35	8213.68	16296.5	15809	37641.5	595.892	7971.49	28660.5	0		-0.562806	-0.148547	0.331987	0.218002	0.991666	0.780245	-0.933638	-0.104178	1.39356	-3.44277	0.188752	4.23911	-0.647197	-2.47154	0.633324	-0.852545	-0.895507	1.67106	-3.73459	-0.828259	-0.438962	NA		0.499688	0.499255	0.499842
P09012	1945.88	4050.03	5569.45	4628.38	10020.2	1210.23	490.534	337.285	3093.55	178.24	0	0	0	0	0	0	0	0	0	0	119765	175896		0.766439	1.56024	1.97544	1.55961	2.29126	1.01395	-2.05526	-1.7908	0.900427	-2.36027	NA	NA	NA	NA	NA	NA	NA	NA	NA	NA	0.699852	0.679279		0.499688	0.245376	0.0151617
P09104	0	0	0	0	0	0	0	0	0	0	0	0	0	0	0	0	0	0	0	0	0	0		NA	NA	NA	NA	NA	NA	NA	NA	NA	NA	NA	NA	NA	NA	NA	NA	NA	NA	NA	NA	NA	NA		NA	NA	NA
P09132	NA	NA	NA	NA	NA	NA	NA	NA	NA	NA	NA	NA	NA	NA	NA	NA	NA	NA	NA	NA	42833.4	66078.1		NA	NA	NA	NA	NA	NA	NA	NA	NA	NA	NA	NA	NA	NA	NA	NA	NA	NA	NA	NA	-0.0849481	-0.0352065		NA	NA	NA
P09211	15097.1	125533	67806.7	67552.3	76784.6	6589.78	8761.41	9769.06	40857.3	126506	20097.7	4149.04	3991.36	14273.5	907.386	16337.4	6553.74	3897.34	8199.08	47695.2	672274	291693		-0.102904	2.42168	1.37107	1.52368	1.16193	-1.71871	-1.91782	-1.18106	0.707942	2.23691	-0.518328	-2.20953	-1.52594	1.28651	-1.89784	-0.928751	-2.28719	-1.8471	-0.101972	1.76002	1.65567	-0.172531		0.499688	0.0356591	0.12587
P09429	286916	792869	585671	402726	732517	343025	446339	388599	323209	385390	640789	369432	277297	193768	209009	434374	448159	379041	188736	284989	822216	692574		-0.198223	0.597771	0.371705	-0.186899	0.479112	-0.297794	-0.398156	-0.236922	-0.25045	-0.414791	0.184031	0.187878	0.24588	-0.0913972	0.173248	-0.416775	-0.35133	0.21114	-0.23807	-0.169526	-0.708363	-1.28045		0.499688	0.499255	0.499842
P09493	152.165	1799.54	628.027	3052.34	240.91	417.433	93.8367	32.9728	34.4969	1150.02	195.864	216.363	18.0615	45.5361	27.9655	276.846	348.349	337.846	33.3518	140.637	3.77766e+06	1.90515e+06		-0.843245	3.14392	1.73502	3.50513	-0.486436	1.19472	-1.60383	-2.31099	-3.18013	2.32733	-0.186547	-0.0479084	-2.7587	-0.105547	-1.00758	0.105067	0.235105	1.42919	-0.920249	-0.41118	2.57909	0.998608		0.499688	0.00285092	0.0384261
P09496	56795.1	122264	53289	138843	86138.8	89015.4	136559	110641	88113.2	136410	227080	52379.8	28846.2	34246.1	8705.47	118102	60914.9	59119.8	14315.2	33851.1	938346	813302		-0.000808678	0.586342	-0.623475	0.867841	-0.21883	0.347577	0.474254	0.579092	0.205516	0.628638	1.35207	-0.176436	-0.453458	0.355492	-1.70709	0.32044	-0.655724	0.258712	-1.27775	-0.626059	0.87887	0.259782		0.499688	0.499255	0.499842
P09497	13796.9	12446.8	25278	42150.4	5102.5	2344.79	1590.24	800.196	11099.3	1499.45	1745.14	18735.9	238.555	765.927	1838.54	2210.52	729.218	685.792	4536.28	15773.4	119572	165001		1.80194	1.20464	2.1333	2.87735	-0.770675	-1.07028	-2.28685	-1.49359	0.825597	-2.21658	-1.89391	2.14045	-3.55833	0.263234	0.577063	-1.73566	-3.43638	-2.28436	1.51774	3.18662	0.554494	0.435474		0.377009	0.394255	0.00682527
P09543	419816	129144	331245	223025	335263	222002	317369	247589	312331	298017	182535	209586	142901	77164	59468.9	386931	359520	132317	123204	166225	137540	297153		1.25818	-1.04083	0.455596	-0.092457	0.200014	0.0285494	0.0570037	0.0784069	0.47673	0.106012	-0.669048	0.227925	0.223589	-0.297605	-0.642554	0.394244	0.286481	-0.321062	0.162198	0.0094406	-0.437266	0.369524		0.499688	0.43458	0.499842
P09622	401327	593915	634538	547136	659063	535021	658377	589356	654076	539188	874410	634556	386260	296135	256197	849315	693120	442239	334879	471401	456074	750706		-0.184433	-0.318262	0.00502015	-0.216823	-0.163833	-0.122469	-0.305794	-0.103421	0.312788	-0.400847	0.160389	0.50695	0.253004	0.0531459	-0.0100561	0.0948809	-0.188443	-0.0455199	0.128837	0.0932556	-0.482577	-0.0578017		0.499688	0.499255	0.499842
P09651	2.43747e+06	8.4653e+06	5.72768e+06	3.4538e+06	5.99083e+06	5.16948e+06	6.02094e+06	5.06428e+06	2.53406e+06	6.49309e+06	7.81351e+06	4.23731e+06	2.26664e+06	3.08446e+06	1.93086e+06	6.94205e+06	5.62756e+06	3.96852e+06	2.67746e+06	3.32569e+06	1.36218e+07	1.45176e+07		-0.502307	0.574192	0.253465	-0.56074	0.156441	0.178742	-0.0882906	0.0145455	-0.405151	0.320132	0.28002	0.172516	-0.279873	0.0692649	-0.256418	0.214902	-0.0272157	-0.0225031	0.0367409	-0.15865	0.121104	0.0638267		0.499688	0.499255	0.499842
P09661	3116.41	26281	32634.6	14342.5	38204	16108.6	26023.2	26800.3	35620.4	20130.1	34254.5	20940.2	8479.24	5387.71	9287.02	37558.3	40471.8	15481.8	9888.64	15917	NA	NA		-2.4712	0.126564	0.278215	-0.814374	0.0519612	-0.392672	-0.329352	0.398524	0.445714	-0.526755	0.295282	0.17654	-0.374298	-0.0982522	0.700711	0.288586	0.400164	0.231857	0.344072	0.0978789	NA	NA		0.117709	0.499255	0.499842
P09874	438918	1.76284e+06	1.31704e+06	1.10246e+06	1.84567e+06	1.24428e+06	1.81866e+06	1.40752e+06	878499	1.52865e+06	2.23927e+06	666091	352622	240322	333366	2.3168e+06	2.07394e+06	912360	520569	651432	6.44321e+06	6.04811e+06		-0.8169	0.388403	0.232418	-0.0467679	0.539203	0.252625	0.344611	0.282613	0.0267108	0.33283	0.624259	-0.306566	-0.766703	-1.34074	-0.603277	0.738103	0.621697	0.0660746	-0.155373	-0.301883	-0.0705259	-0.410956		0.499688	0.499255	0.499842
P09884	NA	NA	NA	NA	NA	NA	NA	NA	NA	NA	NA	NA	NA	NA	NA	NA	NA	NA	NA	NA	81.5985	16548.5		NA	NA	NA	NA	NA	NA	NA	NA	NA	NA	NA	NA	NA	NA	NA	NA	NA	NA	NA	NA	-7.33117	-0.559674		NA	NA	NA
P09936	243403	593394	332044	331100	650824	362342	426962	368135	315949	415533	524623	136509	70865.8	78823.8	103461	385265	381695	214384	92123.5	110814	337063	605027		0.175802	0.882633	0.191978	0.190482	0.946093	0.466313	0.211179	0.376761	0.313912	0.333614	0.586387	-0.659002	-1.1068	-0.67642	-0.166791	0.0843235	0.0812356	0.0559473	-0.597281	-0.898068	-1.22443	-0.683187		0.499688	0.476984	0.499842
P09960	24552.9	177394	103898	47607.2	194678	68593.4	96717.4	58649.9	57980.6	103368	88342.1	6132.25	6879.18	6040.54	4597.58	88715	88943	6812.85	11317	7446.65	242973	132838		-0.28902	2.03969	1.14447	0.116244	1.69832	0.874151	0.791244	0.582607	0.371781	1.06615	0.803736	-2.50052	-1.62498	-0.945989	-1.4829	0.721616	0.733956	-1.92512	-0.570349	-1.88964	1.04374	-0.410305		0.499688	0.0963285	0.224269
P09972	4410.89	5510.11	10892	14271.5	24352.2	7700.97	7789.84	4721.99	9187.95	13270.3	9564.87	5659.32	2885.81	4001.59	603.962	10873.5	11062.1	4588.2	7436.54	9732.2	554399	122720		-0.693137	-0.903787	-0.0426042	0.429746	0.656112	-0.200285	-0.825975	-0.832424	-0.31722	0.138347	-0.292366	-0.500156	-0.701525	0.777721	-2.01079	-0.274776	-0.2597	-0.311866	1.30511	0.6018	3.07536	0.231161		0.499688	0.466712	0.499842
P0C0S8	47857.4	195225	150565	285884	211679	64859.3	151789	119431	254755	483345	157600	185022	48787.2	50841.5	57275.4	200223	215724	213120	97271.4	2.47393e+06	127044	229531		-1.62418	-0.079616	-0.365824	0.625489	-0.130043	-1.45215	-0.69044	-0.656981	0.53038	1.17557	-0.539634	0.393987	-1.02611	-0.579551	-0.355727	-0.23729	-0.124888	0.731467	0.155769	4.37431	-1.55418	-1.01061		0.344378	0.499255	0.499842
P0C2Y1	NA	NA	NA	NA	NA	NA	NA	NA	NA	NA	NA	NA	NA	NA	NA	NA	NA	NA	NA	NA	0	0		NA	NA	NA	NA	NA	NA	NA	NA	NA	NA	NA	NA	NA	NA	NA	NA	NA	NA	NA	NA	NA	NA		NA	NA	NA
P0C5J1	NA	NA	NA	NA	NA	NA	NA	NA	NA	NA	NA	NA	NA	NA	NA	NA	NA	NA	NA	NA	0	0		NA	NA	NA	NA	NA	NA	NA	NA	NA	NA	NA	NA	NA	NA	NA	NA	NA	NA	NA	NA	NA	NA		NA	NA	NA
P0C7P4	0	0	0	0	0	0	0	0	0	0	0	0	0	0	0	0	0	0	0	0	16733.7	53890		NA	NA	NA	NA	NA	NA	NA	NA	NA	NA	NA	NA	NA	NA	NA	NA	NA	NA	NA	NA	-1.30412	-0.0727145		NA	NA	NA
P0CB38	NA	NA	NA	NA	NA	NA	NA	NA	NA	NA	NA	NA	NA	NA	NA	NA	NA	NA	NA	NA	0	0		NA	NA	NA	NA	NA	NA	NA	NA	NA	NA	NA	NA	NA	NA	NA	NA	NA	NA	NA	NA	NA	NA		NA	NA	NA
P0CG08	18544.9	44618.9	51994.8	1544.78	93737.8	43055.8	8764.35	12631.2	0	8945.32	4213.94	0	0	17.3367	0	3094.54	12561.3	8182.48	804.084	9391.44	NA	NA		1.21738	2.10424	2.20092	-2.11344	2.5588	2.25771	0.235985	1.5985	NA	-0.627857	-0.617767	NA	NA	-6.56603	NA	-1.28678	0.7944	0.365022	-1.09524	1.39366	NA	NA		0.499688	0.0826103	0.00479151
P0CG38	NA	NA	NA	NA	NA	NA	NA	NA	NA	NA	NA	NA	NA	NA	NA	NA	NA	NA	NA	NA	64460.4	34160.9		NA	NA	NA	NA	NA	NA	NA	NA	NA	NA	NA	NA	NA	NA	NA	NA	NA	NA	NA	NA	1.91244	0.260529		NA	NA	NA
P0DJ93	56936.6	541.558	267.28	699.432	50.3435	647.388	698.828	0	1392.44	181.213	10.3429	153.35	24.4481	63.0578	634.762	494.191	936.932	180.583	186.702	55.4407	NA	NA		6.05009	0.267904	-0.28836	0.949083	-2.88587	0.746912	1.50142	NA	1.03622	-1.41634	-5.6115	-2.21248	-2.62571	0.419189	2.27894	-0.00365116	0.597367	-0.62663	1.61057	-2.35912	NA	NA		0.000186267	0.499255	0.499842
P0DKV0	8169.96	14787.3	9227.44	13184.6	9439.05	20526.5	14359.9	16363.9	28134.7	6025.05	5851.49	7444.18	345.726	3159.83	10062.2	0	980.476	561.663	4099.53	0	NA	NA		1.25698	0.726817	-0.0963564	0.367163	-0.617907	1.43838	0.24486	1.26765	1.45939	-0.909843	-0.835421	-0.00994447	-2.79386	0.618555	2.41758	NA	-2.77859	-2.35882	0.658036	NA	NA	NA		0.499688	0.499255	0.499842
P0DMV8	2.43874e+07	1.87365e+07	1.91993e+07	1.97263e+07	2.24621e+07	2.15785e+07	5.18738e+07	1.77714e+07	1.70036e+07	1.90931e+07	2.57333e+07	1.69185e+07	1.18382e+07	9.18428e+06	8.26677e+06	2.23091e+07	25546428	1.45105e+07	1.14818e+07	1.93518e+07	8.82795e+07	1.04175e+08		0.648125	-0.356147	-0.065353	-0.106348	0.0713969	0.128246	0.949596	-0.283723	0.461639	-0.16846	-0.0836207	-0.0270262	-0.16964	-0.791274	-0.424187	-0.135547	0.166893	-0.405398	-0.10654	0.18186	0.432099	0.662248		0.499688	0.499255	0.499842
P10155	0	9003.96	3407.68	15343.4	15266.4	5159.35	18996.6	7653.41	24410.5	19477.5	23008.7	16190.3	2347.64	0	406.83	45987.6	50261.2	5047.1	538.745	3.95366	0	0		NA	0.182767	-1.37158	0.788303	0.331167	-0.435949	0.882437	0.339226	1.44127	1.09042	1.46386	1.3651	-0.743458	NA	-1.19458	2.2993	2.3422	1.16459	-1.15359	-9.92572	NA	NA		NA	0.499255	0.17078
P10321	544661	271342	186227	262185	210825	207062	1.09072e+06	344555	84356.2	333898	350158	345058	346312	465692	269465	464100	380685	357247	142052	523880	0	0		1.04949	-0.654768	-1.03007	-0.515744	-1.08779	-0.729063	1.27292	-0.0771894	-2.00463	-0.337739	-0.377859	0.388428	0.914854	1.61564	0.910478	0.00761513	-0.277496	0.466379	-0.315889	1.07643	NA	NA		0.499688	0.499255	0.351568
P10412	0	0	0	0	0	0	0	0	0	0	0	0	0	0	0	0	0	0	0	0	1.24387e+07	1.17466e+07		NA	NA	NA	NA	NA	NA	NA	NA	NA	NA	NA	NA	NA	NA	NA	NA	NA	NA	NA	NA	-0.0399126	-0.283782		NA	NA	NA
P10515	183054	164050	170832	262328	223510	160627	211417	241883	212388	180476	269595	84812.6	59122.9	72433.2	76383.8	277284	229349	95498.3	65455.5	52411.4	449584	433471		0.441494	-0.265252	-0.114962	0.566471	0.00912641	-0.0367363	-0.130767	0.460838	0.313268	-0.22367	0.329451	-0.703048	-0.671984	0.0358104	0.153269	0.316289	0.0356017	-0.383138	-0.357	-1.28868	0.547751	0.151503		0.499688	0.499255	0.499842
P10586	7589.26	20561.5	20179.2	12719.3	120335	95851.7	1405.01	2383.66	146741	1106.82	21380.9	133092	3168.68	2628.27	1128.89	11615.8	4967.33	7137.01	939.505	8870.83	NA	NA		-0.174417	0.874548	0.708748	0.00496799	2.86965	3.40161	-3.61444	-2.02226	3.62225	-3.81454	0.748295	4.01702	-0.809976	-0.0176348	-1.24986	-0.367177	-1.69688	0.11733	-1.9401	0.21258	NA	NA		0.499688	0.480283	0.464298
P10599	36254.3	103684	51558.5	261529	119894	65458.7	124724	119583	110727	300273	166524	28921.1	41994.9	27698.5	3734.63	145227	184489	67367.5	16859.9	32476	959897	1.0089e+06		-0.947044	0.0733569	-0.905263	1.56886	0.0622304	-0.36558	0.0899646	0.425847	0.321767	1.54311	0.628558	-1.30468	-0.166076	-0.318209	-3.28563	0.367563	0.72761	0.1436	-1.33563	-0.975861	0.317933	0.02874		0.499688	0.499255	0.404015
P10606	NA	NA	NA	NA	NA	NA	NA	NA	NA	NA	NA	NA	NA	NA	NA	NA	NA	NA	NA	NA	89515.2	147960		NA	NA	NA	NA	NA	NA	NA	NA	NA	NA	NA	NA	NA	NA	NA	NA	NA	NA	NA	NA	-0.0223927	0.199422		NA	NA	NA
P10644	128199	209042	268655	42473.9	220506	187699	336863	236816	83042.5	135463	205945	127998	62022.9	24091.1	39311.4	215521	168755	100473	98212.6	93260.6	NA	NA		0.349342	0.536425	0.965942	-1.75381	0.369772	0.618769	0.987918	0.866028	-0.718339	-0.236228	0.360466	0.317099	-0.176623	-1.10528	-0.362203	0.369129	0.00483852	0.162112	0.71706	0.00883172	NA	NA		0.499688	0.499255	0.335775
P10768	576481	908068	674700	683012	790147	649360	746917	593310	457592	566063	791610	525222	519675	531663	370941	650013	742374	478102	296280	396625	639931	571120		0.292943	0.228234	0.0198558	0.0394944	0.0356783	0.0866155	-0.19483	-0.177276	-0.282254	-0.396403	-0.0708468	0.153071	0.616624	0.826902	0.45483	-0.379716	-0.161066	-0.0120947	-0.140497	-0.241392	-0.318298	-0.798888		0.499688	0.499255	0.499842
P10809	2.86725e+06	5.3926e+06	1.02119e+07	5.11976e+06	5.79606e+06	4.3963e+06	5.99169e+06	4.6284e+06	4.6077e+06	4.70845e+06	5.03882e+06	2.38776e+06	2.81717e+06	1.45482e+06	1.48709e+06	6.77426e+06	5.87851e+06	3.55856e+06	2.32981e+06	3.31424e+06	2.73272e+07	2.00438e+07		-0.136313	0.0287166	1.23905	0.149917	0.232868	0.0627535	0.0293876	0.005836	0.610796	-0.032669	-0.247606	-0.556516	0.167642	-0.925647	-0.520698	0.30381	0.163152	-0.0604881	-0.045832	-0.0395629	0.825723	0.213472		0.499688	0.499255	0.17078
P11021	2.07719e+06	2.96379e+06	3.11751e+06	3.64837e+06	3.15727e+06	2.65437e+06	1.66822e+07	3.80933e+06	2.53207e+06	3.03127e+06	4.3302e+06	3.33958e+06	1.65932e+06	3.51956e+06	1.22239e+06	3.18444e+06	3.56814e+06	2.7366e+06	1.60447e+06	2.14897e+07	7.72106e+06	1.18696e+07		-0.365063	-0.633135	-0.294298	-0.116049	-0.445514	-0.450867	1.79259	-0.0502635	-0.0722798	-0.456961	-0.235915	0.195134	-0.361505	0.665505	-0.558748	-0.588002	-0.351557	-0.197771	-0.349636	2.99637	-0.658448	-0.189636		0.499688	0.499255	0.499842
P11047	7269.22	18653.7	18768	115812	27867.1	17745.7	20143.3	13239	12215.3	11637.5	12339	9880.44	6153.57	1094.09	1348.12	13576.4	8851.93	3864.64	2181.15	5082.93	21063.3	37401.3		-0.299357	0.612148	0.480367	3.21331	0.556967	0.742556	0.292144	0.432637	-0.211056	-0.362042	-0.195516	0.00972981	0.100669	-1.43859	-1.09179	-0.237263	-0.90539	-0.888361	-0.787358	-0.697217	-0.0929934	0.162135		0.499688	0.499255	0.499842
P11142	1.61143e+07	1.47631e+07	1.1601e+07	1.14604e+07	1.25023e+07	1.23004e+07	5.17371e+07	1.19306e+07	9.5427e+06	1.6694e+07	1.45186e+07	9.23819e+06	5.98586e+06	6.00468e+06	4.04774e+06	1.64488e+07	1.79427e+07	9.54974e+06	6.5712e+06	1.24963e+07	4.03887e+07	7.8455e+07		0.743048	-0.048252	-0.154374	-0.255001	-0.164622	-0.0230375	1.6168	-0.192254	0.238075	0.277944	-0.279976	-0.234007	-0.45304	-0.663996	-0.753112	0.0454013	0.265627	-0.317387	-0.215866	0.231094	0.0351937	0.979377		0.499688	0.499255	0.499842
P11171	12676.1	31156.6	18789.7	11790.6	22897.3	14458.2	14686.5	9762.14	28672.8	18652.3	34886.7	11608.9	4743.81	4477.73	4945.84	30013.3	28568.4	17091.7	10356.4	15393	27792.3	23755.6		-0.0349317	0.71975	-0.193817	-0.778107	-0.381933	-0.21221	-0.836606	-0.735277	0.441295	-0.299848	0.668214	-0.367836	-0.89606	-0.0222619	0.135438	0.283112	0.211357	0.70779	0.806517	0.361243	-0.143034	-0.98099		0.499688	0.499255	0.499842
P11177	288104	384598	369553	603823	393829	306454	474619	318436	761991	538430	396008	216276	165719	118226	93799.9	513860	404238	342277	151177	212096	1.18506e+06	764610		0.042946	-0.159838	-0.036836	0.693636	-0.186302	-0.173926	-0.0212754	-0.23056	1.24724	0.334186	-0.225609	-0.357112	-0.233039	-0.475597	-0.707385	0.121351	-0.223269	0.359231	-0.254506	-0.322432	1.16415	0.184293		0.499688	0.499255	0.499842
P11182	551219	579923	601039	691858	494822	538922	667693	620937	543361	519697	1.09418e+06	589120	401865	573685	468441	1.13835e+06	765066	740740	403169	519799	184965	192278		0.0943521	-0.483182	-0.234905	-0.0280236	-0.763697	-0.260098	-0.437739	-0.16478	-0.161353	-0.634775	0.356773	0.219678	0.160194	0.933025	0.75413	0.378504	-0.19842	0.579777	0.273994	0.0865433	-0.0169919	-0.285251		0.499688	0.499255	0.499842
P11279	48028.5	81548.6	133357	74572.4	276016	184026	242261	98044.7	94454.4	102221	138867	206101	58446.5	48157.4	71605.7	130217	155113	59832.3	105075	121551	104886	173195		-1.03893	-0.796739	-0.0171532	-0.819807	0.769393	0.654526	0.557927	-0.383364	-0.444674	-0.57627	-0.156184	1.09481	-0.187464	0.0217312	0.612958	-0.310247	-0.0441384	-0.531936	0.884723	0.480221	-1.35803	-0.988813		0.499688	0.499255	0.499842
P11310	1292.57	17994	14156.2	10735.8	10863.1	5221.07	6944.23	2803.19	9558.08	1023.05	3130.33	1925.03	716.887	359.038	1079.76	13239.6	15265.9	1382	1878.52	3403.7	283748	210797		-1.39835	2.08077	1.60043	1.16757	0.68196	0.449072	0.234391	-0.329576	0.929273	-2.45717	-0.69482	-0.918834	-1.59505	-1.56673	0.11391	1.25622	1.41529	-0.915742	0.535825	0.198948	1.17088	0.130671		0.398223	0.0878366	0.0613602
P11387	98439	34700.9	27934.9	23711.1	60356.1	38241.2	52329.4	29551	45380.5	55073.2	46842.5	28663	9228.79	8817.25	6722.65	59453.8	45902.4	16929.3	13333.5	18115	213802	244932		2.02409	-0.143835	-0.57235	-0.678085	0.191602	0.2491	0.116178	-0.191575	0.244998	0.369348	0.101347	0.0342668	-0.94117	-0.125239	-0.659493	0.365089	-0.0124978	-0.32356	-0.07344	-0.323328	0.495199	0.136297		0.339122	0.499255	0.499842
P11413	32133.1	135005	179999	117433	204934	142732	177643	181189	163480	68299.1	220583	96932.5	106223	39563.7	125241	120835	133294	110881	73808.5	109685	38995.3	85204.8		-1.7443	-0.171566	0.260128	-0.304913	0.128034	0.141404	-0.0507777	0.413547	0.195884	-1.31169	0.398215	-0.176595	0.588086	-0.267127	1.39348	-0.556913	-0.400131	0.316908	0.281155	0.23733	-1.00497	-0.279001		0.301949	0.499255	0.499842
P11441	102835	0	0	2161.77	2480.2	1695.29	7322.01	5137.27	0	0	0	11528.1	0	0	2106.25	11611.6	1930.5	9248.43	223.401	2258.36	0	0		4.27593	NA	NA	-1.17648	-2.50167	-1.12112	-0.599374	-0.295604	NA	NA	NA	0.843196	NA	NA	1.30709	0.190974	-1.60267	2.10283	-2.55848	-0.338293	NA	NA		0.0151792	NA	NA
P11532	217322	465136	497308	494761	502040	698086	673143	320638	463183	339308	541921	107596	198188	203543	202174	400425	430130	270568	299760	1.74886e+06	0	0		-0.577224	-0.118668	0.193958	0.182568	-0.0290467	0.839292	0.282782	-0.454336	1.37654	-0.560892	0.00975155	-1.61525	-0.189731	0.0773394	0.203889	-0.478619	-0.354195	-0.22079	0.53679	2.63228	NA	NA		0.499688	0.499255	0.499842
P11586	255861	1.29298e+06	1.22982e+06	708179	1.21651e+06	1.15744e+06	1.6075e+06	1.0854e+06	542565	907063	1.58294e+06	433177	573676	554532	315938	1.23956e+06	1.63743e+06	891020	274442	796956	2.15226e+06	2.4156e+06		-1.33343	0.254842	0.441374	-0.374444	0.222392	0.467062	0.478685	0.224521	-0.450067	-0.13979	0.45938	-0.607107	0.287144	0.327213	-0.305567	0.113137	0.561111	0.406043	-0.765042	0.324633	0.441942	0.329892		0.421101	0.499255	0.499842
P11717	4045.68	19966.5	64480.5	46972.3	81473.5	71266.4	61233.7	8125.2	52875.6	13280.7	94681.1	346100	15642.9	1836.8	2443.57	66860.7	45812.9	21133.9	3238.26	38578	NA	NA		-2.32195	-0.544434	1.05093	0.737856	0.963148	1.60224	0.715903	-1.67779	0.808891	-1.39804	1.57127	4.1632	0.293397	-1.98263	-1.60795	0.916249	0.34147	0.449211	-1.64177	1.19808	NA	NA		0.149522	0.499255	0.279787
P11766	NA	NA	NA	NA	NA	NA	NA	NA	NA	NA	NA	NA	NA	NA	NA	NA	NA	NA	NA	NA	12404.4	32673.5		NA	NA	NA	NA	NA	NA	NA	NA	NA	NA	NA	NA	NA	NA	NA	NA	NA	NA	NA	NA	-1.53787	-0.625226		NA	NA	NA
P11802	804.498	0	7253.41	4263.46	7192.12	7099.66	16902.3	1267.39	671.976	9172.23	0	0	0	0	0	0	1767.97	0	0	0	81778.2	100597		-0.9519	NA	0.74278	0.973306	0.20406	1.04873	1.70967	-0.367733	-1.88644	0.948237	NA	NA	NA	NA	NA	NA	-0.641663	NA	NA	NA	0.67757	0.387855		0.499688	NA	0.445386
P11940	281041	639966	556500	372038	604288	515252	586587	669902	263383	468345	635792	289741	200823	306811	226577	599569	608119	309876	320714	260893	3.06265e+06	2.89227e+06		-0.270809	0.199888	0.230127	-0.366083	0.136515	0.237922	-0.0573345	0.496258	-0.600533	-0.176916	0.0961642	-0.233379	-0.301702	0.494403	0.212764	-0.00293814	0.0406103	-0.16398	0.468378	-0.368345	0.584324	0.190925		0.499688	0.499255	0.499842
P12004	1.97236e+06	3.84562e+06	3.73439e+06	3.5897e+06	4.20281e+06	3.31677e+06	4.35761e+06	3.45951e+06	2.50843e+06	3.2606e+06	4.19635e+06	1.73833e+06	1.35759e+06	1.17883e+06	1.1905e+06	5.0041e+06	3.4556e+06	1.9765e+06	1.09924e+06	2.08612e+06	1.15306e+07	1.083e+07		-0.0182354	0.147761	0.372874	0.268963	0.369864	0.286631	0.206321	0.206407	0.274783	0.0495444	0.123675	-0.348238	-0.226115	-0.502752	-0.171094	0.480986	-0.00742442	-0.255557	-0.489963	-0.042158	0.438715	0.147436		0.499688	0.499255	0.499842
P12035	0	0	0	0	0	0	0	0	0	0	0	0	0	0	0	0	0	0	0	0	0	0		NA	NA	NA	NA	NA	NA	NA	NA	NA	NA	NA	NA	NA	NA	NA	NA	NA	NA	NA	NA	NA	NA		NA	NA	NA
P12081	NA	NA	NA	NA	NA	NA	NA	NA	NA	NA	NA	NA	NA	NA	NA	NA	NA	NA	NA	NA	39534.1	35707.1		NA	NA	NA	NA	NA	NA	NA	NA	NA	NA	NA	NA	NA	NA	NA	NA	NA	NA	NA	NA	-0.20151	-1.00991		NA	NA	NA
P12236	505286	219764	461422	236699	354407	187886	354280	178389	157815	359373	133911	90609.1	111051	26850.7	37075.4	456547	310942	67478.5	68343.8	216340	215773	1.32536e+06		1.79619	-0.0135654	1.22265	0.24952	0.570887	0.0419685	0.483588	-0.148625	-0.226741	0.652197	-0.881363	-0.743259	0.109604	-1.67267	-1.12091	0.894641	0.326957	-1.09423	-0.476021	0.652211	-1.65509	0.715697		0.377009	0.499255	0.177826
P12268	63429.7	223215	172754	171667	423727	326401	392908	369656	232480	264432	405453	89137.2	40140.1	48932.3	91468.7	275847	441669	140864	107032	124962	873838	1.09585e+06		-1.3271	-0.0357373	-0.27501	-0.269202	0.803168	0.824996	0.599125	0.896927	0.323873	0.159832	0.725311	-0.801742	-1.44246	-0.832168	0.17857	0.104688	0.810028	-0.043147	0.149051	-0.204562	0.198503	0.205484		0.42197	0.499255	0.499842
P12270	23492.2	39915.4	67105.8	40916	90126.7	49700.2	58084.4	53725.1	51946.3	44150.7	104857	65929.6	29455	31508	34375.9	93560.6	92010.3	62483.9	41803.6	25146	200841	251852		-0.937752	-0.740943	-0.0256422	-0.662444	0.0483242	-0.174063	-0.501175	-0.123088	-0.318015	-0.740451	0.513761	0.483475	-0.0433456	0.838702	0.851546	0.271983	0.259058	0.776148	0.755874	-0.653618	0.712125	0.53099		0.499688	0.499255	0.499842
P12277	2.41043e+06	8.52495e+06	5.0313e+06	7.29551e+06	8.63354e+06	6.01495e+06	7.73114e+06	6.4671e+06	1.9879e+06	6.47791e+06	9.9523e+06	1.08856e+06	762625	1.05162e+06	1.36059e+06	7.10303e+06	9.25108e+06	3.16829e+06	1.06299e+06	1.49678e+06	1.35612e+07	1.23262e+07		-0.163558	0.926597	0.40453	0.899486	1.04014	0.751113	0.632302	0.723326	-0.436959	0.659919	0.987074	-1.49313	-1.54055	-1.16057	-0.420172	0.592537	1.05391	-0.000535588	-0.982045	-0.988726	-0.117157	-0.423302		0.499688	0.458654	0.499842
P12532	NA	NA	NA	NA	NA	NA	NA	NA	NA	NA	NA	NA	NA	NA	NA	NA	NA	NA	NA	NA	3053.3	27933.2		NA	NA	NA	NA	NA	NA	NA	NA	NA	NA	NA	NA	NA	NA	NA	NA	NA	NA	NA	NA	-2.20684	0.70991		NA	NA	NA
P12814	NA	NA	NA	NA	NA	NA	NA	NA	NA	NA	NA	NA	NA	NA	NA	NA	NA	NA	NA	NA	426787	289917		NA	NA	NA	NA	NA	NA	NA	NA	NA	NA	NA	NA	NA	NA	NA	NA	NA	NA	NA	NA	1.15096	0.0918122		NA	NA	NA
P12882	NA	NA	NA	NA	NA	NA	NA	NA	NA	NA	NA	NA	NA	NA	NA	NA	NA	NA	NA	NA	0	0		NA	NA	NA	NA	NA	NA	NA	NA	NA	NA	NA	NA	NA	NA	NA	NA	NA	NA	NA	NA	NA	NA		NA	NA	NA
P12955	20685.5	37236.9	32407.1	9726.29	67892.2	23797.7	44595	23068	9353.48	90179.2	78704.3	1321.38	3488.31	143.672	6037.09	48596	81246.1	1440.93	2542.77	10926.6	8276.3	47330		0.801195	1.10672	0.741822	-0.953128	1.35382	0.649053	0.937383	0.676301	-1.11056	2.16307	2.00366	-3.48501	-1.23805	-5.01262	0.564478	1.12105	1.88356	-2.85563	-1.14637	-0.0377633	-1.88838	0.10313		0.499688	0.427391	0.445468
P12956	1.37124e+06	2.11799e+06	1.82725e+06	1.65548e+06	2.19008e+06	1.5784e+06	2.45225e+06	1.94646e+06	1.86014e+06	2.12368e+06	2.45323e+06	1.6324e+06	713579	613946	536104	2.78592e+06	2.49628e+06	1.17728e+06	835040	1.15801e+06	2.65943e+06	3.80285e+06		0.174452	-0.0403601	0.0177489	-0.151328	0.0948313	-0.09834	0.0818329	0.060926	0.464631	0.119817	0.0497921	0.312642	-0.429061	-0.675689	-0.611587	0.311955	0.200678	-0.272944	-0.161924	-0.159453	-0.649032	-0.353374		0.499688	0.499255	0.499842
P13010	925287	2.6511e+06	1.95061e+06	1.45879e+06	2.09894e+06	1.65747e+06	2.8195e+06	2.31165e+06	1.05592e+06	2.14917e+06	3.70366e+06	1.72478e+06	1.20154e+06	1.86876e+06	993670	4.55235e+06	4.78064e+06	2.91303e+06	1.07651e+06	1.97686e+06	3.88379e+06	4.08124e+06		-0.692819	0.0177158	-0.162898	-0.624787	-0.242602	-0.306608	0.00505381	0.0377829	-0.632012	-0.140252	0.378539	0.103444	0.0571136	0.675874	0.0174654	0.766449	0.894861	0.782623	-0.0694742	0.344679	-0.311758	-0.464303		0.499688	0.499255	0.499842
P13073	36723	70871.9	61077.9	103519	85348.3	34333.1	49151.4	56292.6	77684.7	110133	68977.7	21910.8	19643.6	3344.57	10607.8	86655	65277.7	23096.9	14529	16098.1	19565.3	119012		0.183044	0.549575	0.232566	1.14747	0.351001	-0.280866	-0.338071	0.39558	0.685356	1.03755	0.312026	-0.729205	-0.19048	-1.95883	-0.372069	0.564441	0.152091	-0.236019	-0.328613	-0.867649	-2.52921	-0.395739		0.499688	0.499255	0.499842
P13473	0	0	0	0	0	0	0	0	0	0	0	0	0	0	0	0	0	0	0	0	0	0		NA	NA	NA	NA	NA	NA	NA	NA	NA	NA	NA	NA	NA	NA	NA	NA	NA	NA	NA	NA	NA	NA		NA	NA	NA
P13489	49808.1	103806	111532	102543	129985	102136	151455	96481.5	164693	81454.2	38152.7	106637	65214.7	12585.7	55761.8	24900.2	83173.4	650.642	65669	28891.4	886185	993892		-0.110797	0.425994	0.553325	0.495639	0.467695	0.634345	0.708829	0.459613	1.21329	-0.0566526	-1.21969	0.961417	0.84488	-1.03531	1.1478	-1.91371	-0.109885	-5.32911	1.0774	-0.7743	0.785062	0.542157		0.499688	0.499255	0.499842
P13498	0	0	0	0	0	0	5898.83	0	433.294	1629.85	0	125554	11682.1	0	0	13880.2	5367.71	0	0	0.815184	NA	NA		NA	NA	NA	NA	NA	NA	1.90133	NA	-3.56469	0.00960868	NA	6.28885	3.39245	NA	NA	3.42843	0.512053	NA	NA	-11.968	NA	NA		NA	NA	NA
P13521	72960.2	126806	95418.2	82084.1	57553.9	71352	22182.9	22010	64697.6	37591.9	123908	30937	34997.1	61636.1	18090.9	20538.9	16799.5	38946.8	64745.3	63191.9	NA	NA		0.896843	1.12425	0.613451	0.501299	-0.530095	0.502864	-1.84285	-1.33074	0.117541	-0.87308	0.895859	-0.528236	0.355893	2.05815	0.0788966	-1.89619	-2.18919	0.22434	1.58858	0.864637	NA	NA		0.499688	0.422108	0.499842
P13533	NA	NA	NA	NA	NA	NA	NA	NA	NA	NA	NA	NA	NA	NA	NA	NA	NA	NA	NA	NA	2561.01	1543.91		NA	NA	NA	NA	NA	NA	NA	NA	NA	NA	NA	NA	NA	NA	NA	NA	NA	NA	NA	NA	1.94145	1.75304		NA	NA	NA
P13535	NA	NA	NA	NA	NA	NA	NA	NA	NA	NA	NA	NA	NA	NA	NA	NA	NA	NA	NA	NA	0	0		NA	NA	NA	NA	NA	NA	NA	NA	NA	NA	NA	NA	NA	NA	NA	NA	NA	NA	NA	NA	NA	NA		NA	NA	NA
P13637	0	0	0	0	0	0	0	0	0	0	0	0	0	0	0	0	0	0	0	0	0	0		NA	NA	NA	NA	NA	NA	NA	NA	NA	NA	NA	NA	NA	NA	NA	NA	NA	NA	NA	NA	NA	NA		NA	NA	NA
P13639	1.79135e+06	3.45475e+06	2.81164e+06	1.68763e+06	4.13035e+06	2.90305e+06	4.64514e+06	3.17029e+06	2.09128e+06	3.45127e+06	5.95953e+06	1.31804e+06	974467	1.05111e+06	1.02764e+06	5.97114e+06	7.90614e+06	3.14282e+06	1.11592e+06	2.33005e+06	3.29842e+06	4.23231e+06		-0.132309	0.00296434	-0.0314802	-0.829415	0.357431	0.110245	0.326462	0.0947447	0.000434924	0.151982	0.667802	-0.726667	-0.684648	-0.626049	-0.358843	0.760005	1.23713	0.466155	-0.439158	0.157373	-0.65166	-0.492236		0.499688	0.499255	0.499842
P13645	1.14245e+07	8.1545e+06	6.74444e+06	1.05694e+07	2.6645e+07	6.2649e+06	6.15017e+06	7.09473e+06	6.23554e+06	2.56376e+07	4.87037e+06	6.13279e+06	3.37389e+06	7.583e+06	6.40646e+06	6.8669e+06	4.44731e+06	5.40106e+06	4.36113e+06	6.69153e+06	8.40011e+06	6.49481e+06		0.868893	-0.35705	-0.385559	0.209288	1.51109	-0.429518	-0.955768	-0.371828	0.109639	1.48474	-1.3174	-0.207487	-0.635431	0.415348	0.591512	-0.683204	-1.25166	-0.502958	-0.169942	-0.0539391	-0.713943	-1.19979		0.499688	0.499255	0.499842
P13646	13812	3632.45	2451.72	3966.8	12721	2063.21	2674.1	3141.21	2917.71	8554.93	4573.96	1732.8	1028.34	2209.22	1829.45	3884.6	13442.9	6928.48	1080.84	2679.98	0	0		1.56727	-0.604181	-1.22137	-0.748247	0.629454	-1.22749	-1.48986	-0.38133	-1.2519	0.458404	-0.360361	-1.50954	-1.45031	0.875662	0.591947	-0.826889	0.90643	1.15258	-0.538806	-0.595112	NA	NA		0.437185	0.499255	0.245516
P13647	1.0496e+06	379843	273971	558099	1.90959e+06	561146	295448	297481	217336	1.55557e+06	248211	347486	169272	359885	310603	291510	309647	424695	233980	302850	668482	555999		1.50281	-0.697291	-0.970705	0.0845597	1.68587	0.22658	-1.22208	-0.837426	-1.06907	1.43965	-1.42996	-0.122188	-0.697815	0.641958	0.561474	-1.22037	-1.11362	0.175624	-0.117777	-0.288378	0.090922	-0.504688		0.450886	0.499255	0.372216
P13667	131288	266629	144645	115728	177844	244276	492473	314898	180561	214517	388377	105230	179244	202250	161203	264748	254415	479288	144102	249887	760390	878247		-0.543677	-0.102028	-0.843646	-1.17126	-0.784893	0.0818981	0.625168	0.346823	-0.32395	-0.45088	0.342412	-0.848203	0.475257	0.933468	0.697227	-0.271344	-0.320657	1.45623	0.271937	0.513541	-0.283576	-0.398651		0.499688	0.499255	0.433996
P13674	12503.3	52079.2	72079.4	697674	55230.2	58595.7	65464.8	32251.9	8396.61	62853.2	72323.5	37153.8	24701.6	17923.7	15325.8	56238.2	53512	40261.9	26203.4	59737.4	32597.6	18915.5		-1.54717	-0.0551316	0.279521	3.82343	-0.520543	0.359877	-0.109939	-0.567131	-2.83564	0.0149328	0.211888	-0.128398	0.0231772	0.471876	0.14068	-0.271483	-0.347744	0.461239	0.485812	0.9179	0.450282	-0.958472		0.362848	0.499255	0.499842
P13693	291283	2.10054e+06	1.45359e+06	1.11697e+06	2.43706e+06	1.42882e+06	2.10976e+06	1.68086e+06	676902	1.25206e+06	2.07646e+06	231016	137028	174817	207132	2.26846e+06	2.315e+06	703306	190467	307137	1.92323e+06	963813		-1.05648	1.08678	0.791093	0.405471	1.35289	0.884235	0.982177	0.98453	-0.0389931	0.433318	0.976103	-1.43735	-1.73967	-1.254	-0.811564	1.11155	1.17036	0.17154	-1.19456	-0.993253	0.840939	-0.481311		0.496595	0.432212	0.425936
P13796	10183.9	6394.99	15216.7	12673.6	15884.5	21045	34542.7	9064.17	6961.45	1997.22	21880.9	1802.64	2871.77	499.175	1023.84	21663.5	10682.4	8163	571.309	286.793	48196.4	34406.4		1.08099	-0.0503537	1.11581	0.822623	0.655264	1.93096	2.0292	0.824325	-0.134239	-2.05389	1.60604	-1.60846	-0.122258	-1.66849	-0.557244	1.39678	0.29219	1.13478	-1.82719	-4.07343	-0.109842	-1.20934		0.499688	0.499255	0.240481
P13797	30315.5	24192.1	31350.3	32363.2	42702.3	27679.3	59319	37437	32273.4	40354.1	41581.7	30216.7	4188.73	2164.17	5157.86	63750.4	45605.4	7447.17	5965.37	11319.9	204816	169491		0.782781	-0.175458	0.090553	0.286171	0.162576	0.272171	0.795182	0.667713	0.227952	0.401416	0.422984	0.609021	-1.60619	-1.68776	-0.520455	0.961975	0.467763	-1.03459	-0.744802	-0.520395	-0.283618	-1.13813		0.499688	0.499255	0.499842
P13798	NA	NA	NA	NA	NA	NA	NA	NA	NA	NA	NA	NA	NA	NA	NA	NA	NA	NA	NA	NA	144470	155933		NA	NA	NA	NA	NA	NA	NA	NA	NA	NA	NA	NA	NA	NA	NA	NA	NA	NA	NA	NA	1.38685	0.876102		NA	NA	NA
P13804	36741.7	70410	66314.6	97176.9	117202	67354.2	105107	86052	132032	100401	120146	65898.8	14780.1	18107.6	38299.3	133209	198504	37567.6	41500.8	63348	238111	256994		-0.711927	-0.311019	-0.405019	0.235566	0.110629	-0.146744	-0.00671545	0.138346	0.698905	0.0876762	0.320873	0.0751501	-1.51307	-0.571815	0.477271	0.41399	1.01863	-0.45339	0.263834	0.258512	0.0890394	-0.247536		0.499688	0.499255	0.499842
P13928	NA	NA	NA	NA	NA	NA	NA	NA	NA	NA	NA	NA	NA	NA	NA	NA	NA	NA	NA	NA	0	0		NA	NA	NA	NA	NA	NA	NA	NA	NA	NA	NA	NA	NA	NA	NA	NA	NA	NA	NA	NA	NA	NA		NA	NA	NA
P13929	58962.3	4865.54	9948.51	34082.1	14819.8	11949.9	24074	7490.92	24705.1	16539.5	7533.38	19838.3	31919.3	1965.48	3435.01	22370.7	12377.1	14476.6	6241.92	26649.6	NA	NA		2.41019	-1.91273	-0.997219	0.946111	-0.899211	-0.350147	0.0512909	-0.969594	0.360724	-0.336955	-1.47216	0.574483	2.11165	-1.09176	-0.231467	-0.00265067	-0.902205	0.615678	0.238438	1.32833	NA	NA		0.24682	0.119654	0.362513
P13984	696.122	0	15891.9	0	26227	31245.1	13965	11293.7	23435.9	3413.84	29143.7	11319.9	26639.2	1133.94	1562.21	35524.3	15118	4078.86	4072.73	11387.6	NA	NA		-3.03149	NA	-0.0189591	NA	0.221065	1.36511	0.54225	-0.0600109	0.529467	-1.422	0.847319	-0.0261963	2.08975	-0.603767	-0.0877685	0.963981	-0.352039	-1.05412	-0.111671	0.280151	NA	NA		0.0387972	NA	0.499842
P14174	742078	1.88849e+06	1.51563e+06	3.57617e+06	1.55142e+06	1.42112e+06	1.93982e+06	1.14948e+06	974060	1.14062e+06	1.61256e+06	334319	283753	298079	190815	1.19649e+06	1.1924e+06	636775	305532	367380	1.03141e+06	1.50268e+06		0.16913	0.728118	0.665004	1.94621	0.498246	0.683944	0.671488	0.219575	0.341272	0.11601	0.394394	-1.08219	-0.848791	-0.698382	-1.15212	-0.0259844	0.00482344	-0.188708	-0.697281	-0.914916	-0.787409	-0.506861		0.499688	0.499255	0.487969
P14209	NA	NA	NA	NA	NA	NA	NA	NA	NA	NA	NA	NA	NA	NA	NA	NA	NA	NA	NA	NA	59546.7	53797.4		NA	NA	NA	NA	NA	NA	NA	NA	NA	NA	NA	NA	NA	NA	NA	NA	NA	NA	NA	NA	0.533388	-0.274624		NA	NA	NA
P14314	353598	469198	510085	324135	451112	287529	444324	290285	402653	345396	419599	301705	119706	69088.2	87219	336443	427275	165594	134557	166400	614787	865481		0.597252	0.418143	0.700918	0.0344699	0.266821	-0.00314116	0.143752	-0.101843	0.526972	-0.0749632	0.132333	0.384042	-0.45431	-0.980163	-0.540142	-0.241487	0.122177	-0.449217	-0.154802	-0.418982	0.531547	0.710671		0.499688	0.499255	0.467271
P14618	5.32396e+06	1.45304e+07	1.29479e+07	8.10963e+06	1.56942e+07	1.10294e+07	1.20278e+07	1.41868e+07	6.23072e+06	8.32029e+06	1.27999e+07	3.09863e+06	3.03131e+06	4.00148e+06	3.6884e+06	1.09306e+07	1.28043e+07	5.66585e+06	3.09507e+06	4.10957e+06	1.44102e+07	3.28736e+07		-0.12662	0.64593	0.728089	-0.0421397	0.867979	0.554442	0.184432	0.801893	0.25556	-0.0460045	0.262747	-1.0829	-0.655775	-0.399751	-0.0903329	0.151659	0.465416	-0.292496	-0.540365	-0.639354	-0.376336	0.750657		0.499688	0.499255	0.454485
P14625	1.74643e+06	2.35079e+06	1.80851e+06	4.14365e+06	2.83058e+06	2.09772e+06	3.02692e+06	1.80537e+06	1.86747e+06	1.99512e+06	3.04098e+06	2.76999e+06	887218	919812	987872	2.34328e+06	3.06338e+06	1.55996e+06	910516	1.22282e+06	5.70721e+06	5.49438e+06		0.212424	-0.194842	-0.311034	0.888169	0.169503	0.0060512	0.070595	-0.365864	0.195432	-0.286437	0.0465086	0.763826	-0.438072	-0.43105	-0.0336674	-0.255858	0.200516	-0.190839	-0.359361	-0.415311	-0.200629	-0.476126		0.499688	0.499255	0.499842
P14649	0	0	0	0	0	0	0	0	0	0	0	0	0	0	0	0	0	0	0	0	6.32138e+06	1.42156e+06		NA	NA	NA	NA	NA	NA	NA	NA	NA	NA	NA	NA	NA	NA	NA	NA	NA	NA	NA	NA	3.73302	0.987501		NA	NA	NA
P14678	6960.49	16874.8	23903.7	10642.6	26609.8	14367.4	5552.37	3440.12	11533.7	6765.93	5555.94	580.253	758.805	2740.85	0	874.806	18065.1	1356.5	825.169	2732.38	3956.42	76437.7		0.624717	1.61834	2.05858	0.733914	1.65903	1.60158	-0.460023	-0.353726	0.803984	1.03557	-0.17247	-3.11137	-1.90961	1.1004	NA	-2.10288	1.28331	-0.308729	0.00245843	-0.549991	-2.65041	1.16252		0.499688	0.223474	0.0101426
P14735	NA	NA	NA	NA	NA	NA	NA	NA	NA	NA	NA	NA	NA	NA	NA	NA	NA	NA	NA	NA	17213.9	4136.22		NA	NA	NA	NA	NA	NA	NA	NA	NA	NA	NA	NA	NA	NA	NA	NA	NA	NA	NA	NA	1.15635	-1.76042		NA	NA	NA
P14854	18509	76744.6	69892.3	95427.6	81804.7	37484.1	31357.4	35692.6	62230.5	37032.3	41237.2	6541.66	4380.52	867.711	377.837	51251.8	36690.4	27936.2	4369.59	5190.01	NA	NA		0.135901	1.65788	1.34159	1.96615	1.12286	0.798626	-0.130212	0.73837	1.20954	0.3114	0.489368	-1.65958	-1.45503	-2.93967	-4.22631	0.676904	0.17044	1.03874	-0.988436	-1.67007	NA	NA		0.499688	0.210661	0.134791
P14866	664715	1.32182e+06	1.9855e+06	1.2116e+06	1.70358e+06	1.61842e+06	2.13272e+06	2.03521e+06	704790	1.75669e+06	2.73629e+06	1.36756e+06	1.19055e+06	1.44866e+06	944409	2.19269e+06	2.26624e+06	1.38922e+06	634403	1.63536e+06	1.20623e+06	1.32856e+06		-0.787188	-0.624055	0.256825	-0.485335	-0.168369	0.0607091	-0.000373591	0.248385	-0.909281	-0.0465466	0.346246	0.18782	0.464669	0.775603	0.375912	0.0685159	0.162336	0.123135	-0.43938	0.489685	-0.371413	-0.484724		0.499688	0.499255	0.499842
P14868	409168	369680	406043	405692	422165	426530	501141	364383	338131	277294	378437	323296	195659	146782	160344	385473	527883	224124	195595	256055	761512	784940		0.570339	-0.224634	0.104724	0.101724	-0.0787872	0.317019	0.0596143	-0.0319169	0.0491705	-0.648673	-0.296153	0.246928	0.0138094	-0.16362	0.086322	-0.307571	0.173731	-0.272974	0.125022	-0.0424473	0.192804	-0.0890486		0.499688	0.499255	0.499842
P14923	40548.1	14835.7	14356.9	22078.7	176531	75145.8	20204	24180.1	72944.5	82623.5	25324.2	95029.4	11329.2	34095.1	9927.99	12739	45478.2	14900.3	8133.22	6007.2	25638.2	5589.11		0.929204	-1.18992	-1.40736	-0.611153	1.87953	1.44444	-1.1595	-0.232454	1.05784	1.12494	-0.622025	1.97279	-0.397614	2.17319	0.308008	-1.78171	0.11325	-0.289742	-0.435016	-1.80452	0.16101	-2.71618		0.499688	0.396352	0.160695
P15056	11415.8	5880.1	18987.3	3693.53	16127.4	8536	22873.6	6910.57	16747.2	11701.5	11748.8	14509	7526.49	1372.93	1975.67	11140.6	20945.7	8893	6642.18	16334.1	NA	NA		0.51399	-0.922153	0.714805	-1.779	-0.0684461	-0.153031	0.68664	-0.316681	0.434195	-0.166002	-0.0564029	0.759613	0.579907	-0.903305	-0.310273	-0.3355	0.560846	0.53382	1.1088	1.2146	NA	NA		0.499688	0.459435	0.461474
P15104	NA	NA	NA	NA	NA	NA	NA	NA	NA	NA	NA	NA	NA	NA	NA	NA	NA	NA	NA	NA	0	0		NA	NA	NA	NA	NA	NA	NA	NA	NA	NA	NA	NA	NA	NA	NA	NA	NA	NA	NA	NA	NA	NA		NA	NA	NA
P15121	8958.76	31387.4	25292.9	16242.3	35363.2	29538.9	38371.2	35838.3	14092.1	35664.7	21457.1	4147.21	1706.37	1091.02	3067.32	32044.1	38710.2	8306.14	2367.92	4873.57	NA	NA		-0.299414	1.05555	0.571404	-0.0322416	0.565434	1.16844	0.911249	1.56406	-0.339927	0.973703	0.269515	-1.63978	-2.16148	-1.81606	-0.231233	0.696221	0.96642	-0.0759008	-1.04752	-1.09549	NA	NA		0.499688	0.43458	0.499842
P15170	8933.39	57284.9	58634.2	28140.7	85373.6	36767.4	48620	55111.1	48263.6	41735.7	82462	29113.5	23496	19468.6	30800.7	45196.6	68538.4	39154.6	20298.6	27765.4	53052	68812.1		-1.93454	0.21047	0.131413	-0.816769	0.305687	-0.20135	-0.39129	0.345361	-0.0627154	-0.440066	0.548085	-0.338602	0.0604652	0.674182	1.22842	-0.440536	0.184468	0.535491	0.171023	-0.0804894	-0.443127	-0.623527		0.248021	0.499255	0.499842
P15260	95.9673	17184	939.756	4006.39	14111.9	0	0	0	22346	0	0	67053.3	0	0	0	0	0	0	386.008	0	NA	NA		-4.66577	2.57844	-2.01944	0.997192	1.57395	NA	NA	NA	2.60358	NA	NA	4.88593	NA	NA	NA	NA	NA	NA	-0.385166	NA	NA	NA		0.000286941	0.0228264	0.0291197
P15311	244863	510533	300916	309510	689799	275119	439956	346561	240482	373014	497294	114792	54650.1	34886	38790	305325	434789	139282	41267.1	140545	149808	233954		0.455378	0.994869	0.319812	0.392904	1.2872	0.348834	0.54468	0.578827	0.109744	0.442655	0.817337	-0.660977	-1.2063	-1.50819	-1.2958	0.0397149	0.567454	-0.260057	-1.47596	-0.244857	-0.867757	-0.538151		0.499688	0.438476	0.499842
P15531	334989	704681	637435	743596	868035	584034	759472	676042	414839	510723	730464	185627	136316	112351	165433	679517	686210	280389	195773	215671	204124	368337		-0.0545382	0.396606	0.443637	0.670168	0.664001	0.450122	0.344663	0.552168	0.0297507	-0.0690341	0.345813	-0.906769	-0.857576	-0.9036	-0.204257	0.201542	0.230561	-0.275133	-0.210698	-0.631459	-1.28121	-0.728716		0.499688	0.499255	0.499842
P15880	628850	783900	858801	835971	739928	726653	884556	699707	694711	1.2816e+06	602850	437774	371345	291233	295652	1.10149e+06	1.13953e+06	322805	368170	447292	1.32895e+06	3.7849e+06		0.310528	-0.167106	0.223777	0.190011	-0.2031	0.092994	-0.0945702	-0.106812	0.22195	0.686673	-0.652283	-0.271822	-0.0414976	-0.29144	-0.0737647	0.253131	0.333924	-0.776917	-0.00314439	-0.218074	-0.485354	0.781152		0.499688	0.499255	0.499842
P15924	124327	205754	215829	209636	328596	184572	219202	171691	135821	191892	138820	54125.8	37210.3	37433.9	59181.7	116028	102969	40079.8	51704.9	68360.7	283107	320428		0.316335	0.520268	0.638915	0.657818	0.968364	0.598905	0.349035	0.390302	0.0353722	0.300725	-0.216665	-0.954569	-0.919095	-0.412078	0.270051	-0.541879	-0.713644	-1.18753	-0.229862	-0.435768	0.269259	0.0760689		0.499688	0.499255	0.498718
P15927	NA	NA	NA	NA	NA	NA	NA	NA	NA	NA	NA	NA	NA	NA	NA	NA	NA	NA	NA	NA	408156	102603		NA	NA	NA	NA	NA	NA	NA	NA	NA	NA	NA	NA	NA	NA	NA	NA	NA	NA	NA	NA	3.20127	0.348192		NA	NA	NA
P16152	13988.9	14613.1	43218.3	29550.5	92040	34711.6	49044.9	24271.2	37080.7	36349.5	50447.4	4855.39	0.28851	1690.24	0	80822.8	82030.1	1987.65	43.1286	2126.32	241372	302719		1.04473	0.484235	1.93083	1.522	2.61124	1.9941	1.85877	1.46966	1.75111	1.60204	2.10157	-0.755041	-14.453	-0.602181	NA	2.6667	2.69075	-0.559555	-6.54308	-0.621226	-0.285846	-0.559532		0.499688	0.499255	0.0181843
P16220	NA	NA	NA	NA	NA	NA	NA	NA	NA	NA	NA	NA	NA	NA	NA	NA	NA	NA	NA	NA	76686.7	62420.5		NA	NA	NA	NA	NA	NA	NA	NA	NA	NA	NA	NA	NA	NA	NA	NA	NA	NA	NA	NA	1.30095	0.329799		NA	NA	NA
P16401	0	0	81.0033	0	0	0	0	0	0	0	0	2383.86	0	0	1030.87	4445.58	1993.96	2107.41	2694.38	436930	15103.6	27811		NA	NA	-5.15937	NA	NA	NA	NA	NA	NA	NA	NA	0.312271	NA	NA	1.01776	-0.412883	-1.73579	0.652189	1.05542	7.43009	-0.0877066	0.232075		NA	NA	1.3e-11
P16402	3.1611e+06	6.64656e+06	5.26176e+06	4.57197e+06	6.88075e+06	3.80094e+06	5.3319e+06	4.52053e+06	4.86113e+06	6.31195e+06	5.61343e+06	4.23968e+06	2.14614e+06	1.75594e+06	1.16198e+06	6.2899e+06	5.30041e+06	3.09884e+06	2.36262e+06	3.48466e+06	NA	NA		-0.0719589	0.251803	0.166229	-0.10619	0.403138	-0.244191	-0.232895	-0.119829	0.601759	0.319033	-0.176886	0.22093	-0.319221	-0.728703	-0.982871	0.105918	-0.0819597	-0.352183	-0.108528	-0.0451282	NA	NA		0.499688	0.499255	0.499842
P16403	0	0	0	0	0	0	0	0	0	23.6615	0	0	0	0	0	0	0	0	0	81126.1	NA	NA		NA	NA	NA	NA	NA	NA	NA	NA	NA	-9.56439	NA	NA	NA	NA	NA	NA	NA	NA	NA	8.80718	NA	NA		NA	NA	NA
P16435	NA	NA	NA	NA	NA	NA	NA	NA	NA	NA	NA	NA	NA	NA	NA	NA	NA	NA	NA	NA	70150.3	91916.8		NA	NA	NA	NA	NA	NA	NA	NA	NA	NA	NA	NA	NA	NA	NA	NA	NA	NA	NA	NA	1.32448	1.11886		NA	NA	NA
P16615	1.26919e+06	628710	617897	6.24065e+06	909706	586761	1.28843e+06	586190	1.24619e+06	1.31362e+06	987562	1.47495e+06	2.78622e+06	561141	354840	1.16213e+06	1.36465e+06	567120	394962	1.84013e+06	1.71544e+06	4.2555e+06		0.655667	-1.23376	-0.990307	2.45097	-0.614573	-0.95482	-0.257592	-1.10734	0.401853	0.00846454	-0.664922	0.800714	2.22649	-0.103187	-0.565322	-0.388554	-0.110104	-0.695499	-0.643148	1.16071	0.104474	1.1848		0.499688	0.376022	0.364922
P16949	373261	1.74423e+06	670288	1.31609e+06	1.40624e+06	603207	1.04597e+06	676090	598152	1.25453e+06	1.52595e+06	515654	278239	177862	158547	745587	778586	873623	227973	483136	1.50002e+06	3.07402e+06		-0.453819	1.0168	-0.144576	0.864409	0.75519	-0.185668	0.156407	-0.163168	0.0130136	0.660006	0.72119	-0.0310884	-0.472542	-1.04936	-1.01548	-0.326097	-0.227565	0.692775	-0.724606	-0.103016	-0.865319	-0.081057		0.499688	0.436496	0.499842
P16989	226421	571220	472166	357751	437309	462332	545458	454372	309607	704210	751123	576395	262021	354336	276156	563084	677296	424954	332897	293021	2.52431e+06	2.25898e+06		-0.669417	-0.0501324	-0.0939837	-0.50353	-0.423347	-0.00323166	-0.244976	-0.162091	-0.437549	0.351661	0.263506	0.71071	0.0142991	0.625573	0.425825	-0.175854	0.121916	0.225116	0.442484	-0.275267	0.393187	-0.0791753		0.499688	0.499255	0.499842
P17029	NA	NA	NA	NA	NA	NA	NA	NA	NA	NA	NA	NA	NA	NA	NA	NA	NA	NA	NA	NA	0	0		NA	NA	NA	NA	NA	NA	NA	NA	NA	NA	NA	NA	NA	NA	NA	NA	NA	NA	NA	NA	NA	NA		NA	NA	NA
P17066	0	0	0	0	0	0	0	0	0	0	0	0	0	0	0	0	0	0	0	0	0	0		NA	NA	NA	NA	NA	NA	NA	NA	NA	NA	NA	NA	NA	NA	NA	NA	NA	NA	NA	NA	NA	NA		NA	NA	NA
P17096	443.779	63087.8	65460.2	1534.13	70417.3	23285.8	19762.3	6199.17	91.5697	25930.1	40720.8	14438.5	3931.96	9531.71	8523.68	62922.9	49759	24132.1	8947.4	10637.7	NA	NA		-3.81297	2.07699	1.97316	-3.61929	1.57342	0.778685	-0.121143	-1.11712	-7.96546	0.46239	1.20292	0.212303	-0.931352	1.4203	1.27611	1.68237	1.31518	1.50339	0.922427	0.0539552	NA	NA		0.00486959	0.0881156	0.0151617
P17152	8404.66	606.721	1430.51	15565.9	1393.82	881.912	10618.5	2212.65	12537	2478.13	0	0	0	0	0	0	0	0	0	0	NA	NA		0.981396	-2.25043	-0.9045	1.51277	-1.6118	-1.41023	0.751778	-0.832434	1.12527	-1.34996	NA	NA	NA	NA	NA	NA	NA	NA	NA	NA	NA	NA		0.499688	0.0508621	0.404015
P17174	130311	167665	157177	175302	242290	138730	156131	166438	178426	136154	215587	86158	29146.7	24343.6	31654.9	148691	165510	81849.8	53669.1	41864.5	310796	342780		0.506118	0.33839	0.306006	0.525462	0.66289	0.303156	-0.0243664	0.468172	0.585375	-0.082671	0.563205	-0.12859	-1.15906	-0.966039	-0.559013	-0.0467035	0.116512	-0.0192685	-0.0649821	-1.04882	-0.415693	-0.630819		0.499688	0.499255	0.499842
P17480	0	60.0986	954.541	871.532	5897.72	2181.5	7036.62	4527.04	680.078	15280.6	41649.2	21836.4	6555.26	11345.7	12441.6	3665.85	4645.68	20125.4	512.336	310.784	211258	199690		NA	-5.37098	-1.35225	-2.59597	-0.215043	-0.837323	0.264046	0.413407	-3.0204	1.58022	3.18601	2.68321	1.68833	3.58679	3.76509	-0.637667	-0.359595	3.06055	-1.37454	-2.35776	1.73949	1.0579		NA	1.31e-09	0.177826
P17655	NA	NA	NA	NA	NA	NA	NA	NA	NA	NA	NA	NA	NA	NA	NA	NA	NA	NA	NA	NA	22705.2	58392.8		NA	NA	NA	NA	NA	NA	NA	NA	NA	NA	NA	NA	NA	NA	NA	NA	NA	NA	NA	NA	-1.68287	-0.795531		NA	NA	NA
P17661	0	0	0	0	0	0	0	0	0	0	0	0	0	0	0	0	0	0	0	0	0	0		NA	NA	NA	NA	NA	NA	NA	NA	NA	NA	NA	NA	NA	NA	NA	NA	NA	NA	NA	NA	NA	NA		NA	NA	NA
P17812	192882	403256	498869	261871	552390	246173	436073	349018	297660	415397	599919	260613	190689	83375.7	135196	683468	714295	322786	155652	314785	339473	454373		-0.472607	-0.00891782	0.490664	-0.468384	0.398374	-0.41892	-0.0663428	-0.0133049	-0.069362	0.0295374	0.47305	0.00180014	0.0567037	-0.91512	-0.0828945	0.626551	0.704664	0.352758	-0.130465	0.345958	-0.908946	-0.803072		0.499688	0.499255	0.499842
P17844	474174	1.43291e+06	1.18632e+06	1.39367e+06	1.34404e+06	1.02504e+06	1.60007e+06	954888	830699	766089	1.27893e+06	617185	804392	446457	322582	1.55976e+06	1.33198e+06	658634	298811	1.02195e+06	2.92001e+06	3.52945e+06		-0.58848	0.207864	0.197908	0.436634	0.184535	0.0918999	0.282038	-0.165363	0.0224074	-0.575181	-0.0664615	-0.280049	0.594384	-0.236286	-0.4959	0.267593	0.0735211	-0.261236	-0.84345	0.502502	0.136823	0.15083		0.499688	0.499255	0.499842
P17858	11097.2	58452.2	105630	87518.1	111234	46853.1	227571	117081	60824.7	169388	158391	113430	50081.9	53474.8	38688.9	165736	115232	55735.2	42194.9	87795.9	111638	84519.6		-2.6092	-0.715945	0.13389	-0.0641515	-0.139088	-0.811143	1.00182	0.480629	-0.604696	0.728072	0.595123	0.750114	0.188299	0.997536	0.420887	0.598211	0.0694325	0.0355672	0.192499	0.641959	0.170269	-0.73085		0.0920718	0.499255	0.499842
P17931	2.05415e+06	2.93482e+06	2.18284e+06	2.18042e+06	1.83889e+06	2.45095e+06	2.91166e+06	2.2379e+06	2.36492e+06	1.80554e+06	3.66297e+06	2.22549e+06	1.99948e+06	2.12047e+06	1.33461e+06	2.30134e+06	1.48255e+06	2.33058e+06	1.8606e+06	2.12333e+06	3.75911e+06	3.60641e+06		0.277603	-0.0478715	-0.212168	-0.242863	-0.656325	0.0590527	-0.163148	-0.227039	0.34913	-0.616082	0.145884	0.267081	0.599247	0.649366	0.240579	-0.465223	-1.06409	0.235221	0.52863	0.235547	0.206817	-0.0820739		0.499688	0.499255	0.499842
P17980	1.27091e+06	711432	592867	776441	578182	479352	816439	658898	1.20449e+06	526692	1.04196e+06	646683	386732	159937	194383	1.2775e+06	1.42893e+06	626561	306554	637346	2.42921e+06	3.15082e+06		1.33234	-0.313885	-0.337518	0.0696519	-0.584223	-0.533785	-0.225475	-0.198992	1.016	-0.653415	0.160671	0.300662	0.0104734	-1.16558	-0.69185	0.462251	0.655215	0.211599	-0.27462	0.298568	1.06063	1.14854		0.496409	0.499255	0.499842
P17987	1.04519e+06	1.71908e+06	1.76725e+06	1.75245e+06	1.96227e+06	1.59977e+06	1.97574e+06	1.70623e+06	1.61486e+06	1.56555e+06	1.76525e+06	1.11326e+06	888041	546403	750555	2.63951e+06	2.62185e+06	1.02264e+06	781818	1.21892e+06	6.93775e+06	7.5462e+06		-0.0734911	-0.190397	0.127128	0.0865492	0.0933053	0.0782672	-0.0856806	0.0230265	0.431962	-0.174758	-0.285817	-0.108206	0.0467686	-0.711123	0.0392027	0.392026	0.436919	-0.334878	-0.106814	0.0652258	-0.270947	-0.374435		0.499688	0.499255	0.499842
P18031	6394.94	0	0	4402.37	0	0	0	0	0	0	0	0	0	0	0	0	0	0	0	0	0	46797.9		-0.740485	NA	NA	-2.03796	NA	NA	NA	NA	NA	NA	NA	NA	NA	NA	NA	NA	NA	NA	NA	NA	NA	2.21358		0.499688	NA	NA
P18077	264888	449222	371146	258334	322530	271713	386042	346646	247048	510011	305898	182198	130545	146948	178758	288116	273277	179568	255007	153356	1.0914e+06	753530		0.22348	0.388721	0.278982	-0.25772	-0.176654	-0.0409282	-0.0175622	0.208226	-0.129234	0.560147	-0.295453	-0.307448	-0.276688	0.169888	0.567326	-0.427033	-0.494738	-0.286935	0.838189	-0.493569	0.658304	-0.221814		0.499688	0.499255	0.499842
P18085	87676.2	108569	90164.2	58861.6	112441	82564.1	141603	77004	54688.7	79842.2	69163.6	27818.6	25382.2	16140.3	13154.7	70358.1	72833.3	28975.6	20089.2	42229	17147	80535.2		0.940709	0.655657	0.300151	-0.217945	0.255335	0.49373	0.719667	0.328378	-0.350607	0.0395201	-0.205802	-0.896526	-0.345676	-0.186794	-0.61916	-0.260249	-0.197986	-0.439517	-0.398504	0.0354043	-2.04229	-0.278865		0.499688	0.499255	0.499842
P18124	430274	374165	450884	360486	753165	266224	271119	414045	289002	1.0116e+06	417032	185049	78330.3	102267	93083.2	606752	453695	220808	103273	407759	512055	774920		0.70615	-0.12837	0.327494	-0.00430162	0.845413	-0.313626	-0.785155	0.230017	-0.13173	1.33943	-0.0778299	-0.523035	-1.27856	-0.616736	-0.647471	0.438461	0.0176387	-0.222479	-0.75034	0.719367	-0.0786334	0.209345		0.499688	0.499255	0.499842
P18206	2993.93	64496.8	53747.2	54591.6	66616.1	29854.1	44210.5	40954	18739.3	38803.3	47190.3	1640.47	871.177	3069.67	976.806	69374.7	66823.8	7068.86	660.294	23418	191345	244329		-2.02066	1.91481	1.48192	1.67548	1.3837	1.00116	0.941513	1.44751	-0.0132665	0.935784	1.22334	-3.13179	-3.29745	-0.495782	-2.27286	1.67786	1.61941	-0.476635	-3.30856	1.16372	-0.0445264	-0.289233		0.220475	0.128692	0.0915243
P18615	0	45472.4	2396.95	37000.5	3980.68	5141.21	17532.8	3923.59	7955.4	6003.14	186.081	70968.8	12851.3	2637.13	25050.8	43.3326	35525.1	699.947	29817.3	3238.29	28717.9	147863		NA	2.48823	-1.01123	2.08674	-1.79141	-0.553146	0.632184	-0.848098	0.743101	-0.795807	-5.9042	3.50783	1.76236	0.411656	3.79365	-8.2516	1.7217	-2.87079	3.63617	-0.799075	-1.44747	0.39281		NA	0.0299408	0.356714
P18621	1.80638e+06	1.26991e+06	1.26809e+06	864112	1.18529e+06	797687	1.25382e+06	1.73e+06	1.31403e+06	1.3386e+06	1.13989e+06	1.32306e+06	813787	1.0383e+06	1.4308e+06	999457	1.49842e+06	1.32013e+06	1.09637e+06	2.16079e+06	2.13343e+06	2.66703e+06		0.890975	-0.496026	-0.220849	-0.803387	-0.517368	-0.804564	-0.603862	0.193725	0.220757	-0.261514	-0.773719	0.321584	0.0835454	0.450232	1.17282	-0.910124	-0.260601	0.225188	0.558789	1.08864	-0.493325	-0.411309		0.499688	0.499255	0.499842
P18669	444108	1.03969e+06	787096	732118	1.05328e+06	742270	813863	900170	681097	808603	1.0159e+06	345853	142042	195336	250808	1.15261e+06	1.34331e+06	420186	281053	325742	4.84877e+06	4.3403e+06		-0.0383222	0.409371	0.254709	0.15276	0.484768	0.28391	-0.0569134	0.424825	0.362223	0.165525	0.279052	-0.463809	-1.31186	-0.741603	-0.167923	0.482032	0.74266	-0.231839	-0.250269	-0.52913	0.693388	0.242925		0.499688	0.499255	0.499842
P18754	774131	612257	566453	344459	563451	507974	577676	543717	416300	557962	642294	597608	498645	553980	588912	1.09064e+06	942552	483257	643557	2.83484e+07	296911	383569		0.410943	-0.661098	-0.549631	-1.29034	-0.781271	-0.586089	-0.886319	-0.610995	-0.741884	-0.733562	-0.686098	0.032949	0.246768	0.594095	0.840216	0.0810082	-0.116495	-0.30083	0.71229	5.80201	-0.363857	-0.298184		0.499688	0.499255	0.499842
P18850	93616	7975.93	6414.1	10948.2	4047.23	9246.2	14185.9	8888.82	10205.4	11772.9	9474.59	9559.45	96893.3	11936.8	8573.82	18094.8	9723.86	14487.3	15980.4	61646.8	NA	NA		2.91591	-1.38919	-1.8876	-0.965453	-3.07025	-0.954262	-0.967275	-0.956228	-1.17914	-1.06402	-1.35533	-0.736224	3.5768	1.39629	0.901798	-0.540897	-1.47854	0.406349	1.40151	2.39549	NA	NA		0.148429	0.309632	0.0441713
P18887	NA	NA	NA	NA	NA	NA	NA	NA	NA	NA	NA	NA	NA	NA	NA	NA	NA	NA	NA	NA	21605.5	12826.9		NA	NA	NA	NA	NA	NA	NA	NA	NA	NA	NA	NA	NA	NA	NA	NA	NA	NA	NA	NA	0.860589	-0.606951		NA	NA	NA
P19012	0	0	0	0	0	0	0	0	0	0	0	0	0	0	0	0	0	0	0	0	0	0		NA	NA	NA	NA	NA	NA	NA	NA	NA	NA	NA	NA	NA	NA	NA	NA	NA	NA	NA	NA	NA	NA		NA	NA	NA
P19338	4.66541e+06	9.90131e+06	7.98694e+06	7.35637e+06	8.97414e+06	8.46134e+06	1.20651e+07	9.35362e+06	5.78099e+06	1.2457e+07	1.86404e+07	1.21864e+07	7.46931e+06	1.07041e+07	6.58862e+06	1.75703e+07	1.83848e+07	1.51747e+07	6.74875e+06	9.29897e+06	2.07144e+07	2.0382e+07		-0.780454	-0.355455	-0.423158	-0.624419	-0.386252	-0.279973	-0.252206	-0.255868	-0.25591	0.124152	0.383261	0.495772	0.214895	0.566711	0.306874	0.425166	0.57585	0.70459	0.155103	0.113699	-0.0309401	-0.12859		0.499688	0.499255	0.499842
P19367	147.897	6233.16	0	0	3091.95	5739	40774.1	8057	16098.1	27892.5	21836.3	9784.46	3843.29	0	957.656	37726.7	2303.13	0	5693.97	3723.98	NA	NA		-6.30705	-0.0499732	NA	NA	-1.79428	-1.02562	1.30642	0.679553	0.134078	0.893574	1.65988	-0.0757243	0.376483	NA	-0.640322	1.24738	-1.98892	NA	1.65154	-0.20024	NA	NA		2.09e-07	0.499255	NA
P19387	19321.1	2155.94	5336.22	9941.84	20426.6	3322.59	15895	19616.8	15143.2	31800.5	29879.8	2010.76	5021.58	6075.91	2769.55	51724.7	100049	14357.7	14290.3	44337.1	NA	NA		0.790535	-2.02055	-1.8601	-0.845703	-0.342797	-2.20777	-0.500354	0.564531	-0.308155	0.721128	0.683143	-2.8084	-0.608906	0.688233	-0.47451	1.336	2.32055	0.673057	1.57183	2.1621	NA	NA		0.499688	0.0892616	0.0492268
P19474	1.99816e+06	5.22798e+06	5.47211e+06	3.73899e+06	3.61196e+06	4.33936e+06	6.08591e+06	6.61856e+06	3.48446e+06	4.74946e+06	8.40656e+06	2.08577e+06	2.27826e+06	4.82628e+06	2.64784e+06	6.61554e+06	5.07212e+06	4.14463e+06	4.11885e+06	3.10771e+06	1.51893e+07	1.14269e+07		-0.738383	-0.0934841	0.236417	-0.388964	-0.548442	-0.0284801	-0.0178917	0.464472	0.108479	-0.0947709	0.442133	-0.821652	-0.209139	0.806998	0.274298	0.1938	-0.132723	0.103024	0.737382	-0.198136	0.591734	0.00702088		0.499688	0.499255	0.499842
P19623	30620.8	94314.6	51682.2	62733.7	144075	51809.7	76272.9	70944.4	28655.2	72168.1	68488.5	11713.8	1125.07	326.417	2704.72	74197.7	93147	8482.84	6201.42	13985.1	105096	332951		0.542716	1.59647	0.587231	1.01999	1.72752	0.953049	0.922241	1.36538	-0.19485	1.01842	0.915756	-1.04934	-3.81645	-3.73202	-1.74518	0.940615	1.28438	-1.09557	-0.948016	-0.456711	-0.887144	0.260539		0.499688	0.23282	0.499842
P19878	0	0	0	0	0	0	0	0	0	0	0	0	0	0	0	0	0	0	0	0	0	0		NA	NA	NA	NA	NA	NA	NA	NA	NA	NA	NA	NA	NA	NA	NA	NA	NA	NA	NA	NA	NA	NA		NA	NA	NA
P20020	310614	309145	242679	140901	123726	605801	519975	150077	1.06713e+06	830952	277304	173400	413350	601831	18142.4	402315	374137	837374	1835.13	330685	NA	NA		0.550622	-0.0671633	-0.269981	-1.08253	-1.54064	1.26045	0.52245	-0.958331	2.14634	1.38849	-0.35134	-0.304939	1.54869	2.40974	-2.77595	0.164076	0.0630882	2.12868	-6.49499	0.750882	NA	NA		0.499688	0.499255	0.499842
P20042	62482.5	95804.2	135631	63298.2	122161	61661.2	54608.7	53014.6	73690.9	55478.6	56297.1	37710.7	14413.6	11141.7	10228	62271.2	58870.6	25018.6	20209.5	26202.4	580728	292887		0.681752	0.731343	1.20177	0.159745	0.686966	0.313582	-0.417638	0.0219126	0.380092	-0.226741	-0.237745	-0.177364	-0.9432	-0.572448	-0.808187	-0.15641	-0.227781	-0.426969	-0.170003	-0.431169	1.53559	0.0107108		0.499688	0.499255	0.188811
P20073	NA	NA	NA	NA	NA	NA	NA	NA	NA	NA	NA	NA	NA	NA	NA	NA	NA	NA	NA	NA	0	0		NA	NA	NA	NA	NA	NA	NA	NA	NA	NA	NA	NA	NA	NA	NA	NA	NA	NA	NA	NA	NA	NA		NA	NA	NA
P20290	552551	2.68695e+06	1.3298e+06	924740	2.03785e+06	1.14043e+06	2.14581e+06	1.44511e+06	721428	1.39974e+06	2.68415e+06	634500	324107	410847	301903	2.52384e+06	2.55786e+06	1.51322e+06	315515	866856	748797	1.3498e+06		-0.509711	0.998128	0.221275	-0.318772	0.656756	0.104927	0.572503	0.305953	-0.338896	0.174373	0.893142	-0.383509	-0.903323	-0.497934	-0.735766	0.836635	0.896264	0.834672	-0.90663	0.111892	-1.34485	-0.738886		0.499688	0.438476	0.499842
P20339	NA	NA	NA	NA	NA	NA	NA	NA	NA	NA	NA	NA	NA	NA	NA	NA	NA	NA	NA	NA	0	0		NA	NA	NA	NA	NA	NA	NA	NA	NA	NA	NA	NA	NA	NA	NA	NA	NA	NA	NA	NA	NA	NA		NA	NA	NA
P20340	NA	NA	NA	NA	NA	NA	NA	NA	NA	NA	NA	NA	NA	NA	NA	NA	NA	NA	NA	NA	36157	19326.9		NA	NA	NA	NA	NA	NA	NA	NA	NA	NA	NA	NA	NA	NA	NA	NA	NA	NA	NA	NA	1.21246	-0.424961		NA	NA	NA
P20396	42096.1	31716.2	9667.7	0	30893.5	11183.2	12297.5	92226	43424	57571.7	90608.9	17870.1	30056	24664.2	48506.6	45016.6	32245.2	20986.5	38848.3	26924.4	NA	NA		0.470011	-0.584231	-1.45382	NA	-1.14232	-1.9099	-2.38526	1.22752	-0.138969	0.129449	0.792456	-0.994047	0.527541	1.15176	2.04388	-0.362717	-0.863522	-0.300743	1.26103	1.00986	NA	NA		0.499688	0.499255	0.147791
P20618	837252	330227	273400	260473	413796	198147	336371	366515	223874	274896	253619	86115	68191.4	38913.9	37794.1	414571	812992	123359	77152.8	191827	294511	312838		2.27654	0.3368	0.170228	0.127696	0.520692	-0.147423	0.137339	0.654058	-0.00118557	-0.0190705	-0.193417	-1.09561	-0.885014	-1.35841	-1.34508	0.486244	1.49023	-0.451021	-0.554738	0.209143	0.0663827	-0.176744		0.271953	0.499255	0.499842
P20674	51854.6	177552	113211	131295	172099	72993.5	75822.3	97560.8	77565.4	521277	175594	46397	163181	72253.7	44152.2	285544	244532	164745	123695	179637	270244	283115		-1.06771	0.21925	-0.397728	-0.116252	-0.0673493	-0.861124	-1.30944	-0.532158	-0.873103	1.7071	0.0519372	-1.26191	1.19839	0.472282	-0.254704	0.717399	0.491671	0.827961	0.981545	0.917584	0.21044	-0.091165		0.496409	0.499255	0.499842
P20700	1.09526e+08	2.72855e+08	1.72286e+08	6.87613e+07	1.22554e+08	1.71314e+08	2.43411e+08	2.62754e+08	8.31269e+06	9.1752e+07	2.91421e+08	1.46185e+08	1.26301e+08	214672954	1.7011e+08	2.25759e+08	1.82114e+08	2.34167e+08	135752673	1.30027e+08	866211	955854		0.0423629	0.791517	0.362059	-1.08555	-0.239768	0.371724	0.411826	0.884935	-3.43929	-0.669072	0.690663	0.342304	0.510799	1.05467	1.2332	0.4729	0.254707	0.892424	0.727427	0.176552	-0.0718324	0.0598628		0.499688	0.499255	0.499842
P20810	NA	NA	NA	NA	NA	NA	NA	NA	NA	NA	NA	NA	NA	NA	NA	NA	NA	NA	NA	NA	8586.24	10320.2		NA	NA	NA	NA	NA	NA	NA	NA	NA	NA	NA	NA	NA	NA	NA	NA	NA	NA	NA	NA	-0.775479	-1.11573		NA	NA	NA
P20962	448674	401218	170630	717345	300892	248808	198961	113962	139979	170707	175447	155712	29314.9	6521.76	20468.5	172338	303522	143900	28511.3	127618	604348	274153		2.06362	1.34866	0.17999	2.35215	0.754239	0.906509	0.0708228	-0.368421	0.00205282	-0.0140701	-0.0227714	0.497017	-1.42559	-3.2823	-1.5319	-0.102497	0.741052	0.502536	-1.31386	0.321156	-0.166873	-1.67838		0.333171	0.332252	0.499842
P21281	NA	NA	NA	NA	NA	NA	NA	NA	NA	NA	NA	NA	NA	NA	NA	NA	NA	NA	NA	NA	746424	772664		NA	NA	NA	NA	NA	NA	NA	NA	NA	NA	NA	NA	NA	NA	NA	NA	NA	NA	NA	NA	1.45452	1.13339		NA	NA	NA
P21333	1.41727e+06	4.14324e+06	3.06559e+06	2.8875e+06	3.75637e+06	3.37128e+06	4.49183e+06	5.10965e+06	2.19653e+06	4.15956e+06	4.81204e+06	3.30472e+06	2.28472e+06	2.66306e+06	2.25877e+06	4.23722e+06	4.04486e+06	2.8755e+06	2.30163e+06	2.68759e+06	1.03253e+07	8.16569e+06		-0.820572	-0.0398826	-0.221481	-0.360152	-0.09453	0.00712209	-0.0544327	0.485467	-0.207956	0.111204	0.0234407	0.294928	0.233645	0.385047	0.469986	-0.0662689	-0.0709682	-0.00935963	0.299739	0.0207919	0.380964	-0.155535		0.499688	0.499255	0.499842
P21796	2.3101e+06	959429	1.00186e+06	3.53453e+06	1.02793e+06	771555	1.57947e+06	1.06494e+06	951372	1.03668e+06	881904	475082	4.12675e+06	410103	610809	1.08824e+06	911977	512732	592376	2.13179e+06	1.5233e+07	2.70261e+07		1.41613	-0.754015	-0.412256	1.45116	-0.569994	-0.695092	-0.101383	-0.36914	-0.0993834	-0.482602	-0.99679	-1.04358	2.6578	-0.774173	0.0647814	-0.624245	-0.839906	-1.02356	-0.198337	1.22726	2.02105	2.62449		0.476055	0.499255	0.499842
P21912	133701	187629	202613	287464	239572	279054	253434	222168	167209	143885	223591	90153.5	129893	45242.1	60027.2	284596	253264	163173	71589.6	119508	107510	264752		-0.0750141	-0.113805	0.0872733	0.652772	0.0601776	0.734849	0.0889108	0.28467	-0.0957219	-0.610741	0.0020395	-0.663006	0.449552	-0.708125	-0.251441	0.305602	0.133859	0.367305	-0.270899	-0.110934	-1.37212	-0.374646		0.499688	0.499255	0.499842
P22061	87929.3	412638	202092	294540	259779	276611	346116	279696	256061	350385	357751	129032	88683.5	144872	42719.7	365346	338927	161904	90599.8	174092	745076	599211		-1.11721	0.592373	-0.318831	0.253003	-0.199005	0.299276	0.131443	0.202628	0.201578	0.302599	0.257041	-0.525208	-0.54163	0.491411	-1.2386	0.241939	0.136886	-0.120019	-0.381142	0.00850892	0.277608	-0.376394		0.491321	0.499255	0.499842
P22087	141162	389701	271000	156805	291237	272009	431102	349431	230407	379457	397123	240826	93261.1	158031	114386	514367	517379	195537	222985	231902	464695	418390		-0.720858	0.197738	-0.190468	-0.993648	-0.336638	-0.0342448	0.149679	0.225301	-0.261858	0.113271	0.103457	0.0956291	-0.775106	0.310386	-0.082534	0.442187	0.457766	-0.1483	0.6499	0.126493	0.232892	-0.253141		0.499688	0.499255	0.499842
P22102	1.15577e+06	1.41917e+06	1.38423e+06	2.57439e+06	1.5364e+06	1.25174e+06	1.61644e+06	1.29062e+06	1.75406e+06	1.01067e+06	1.72637e+06	1.61662e+06	936819	863854	1.02104e+06	1.54459e+06	1.60263e+06	1.35372e+06	997491	1.06343e+06	846334	1.55479e+06		0.118687	-0.431489	-0.194691	0.724285	-0.237672	-0.23473	-0.326124	-0.34196	0.522847	-0.784275	-0.248567	0.526094	0.196116	0.106458	0.585911	-0.368341	-0.27049	0.178484	0.323076	-0.062618	-0.706909	-0.0642942		0.499688	0.499255	0.499842
P22234	397957	627787	507352	492693	869251	497973	723519	559905	537003	594023	719335	308436	142013	90003.8	95543.7	661161	656067	265657	113194	243918	932125	1.06276e+06		0.321024	0.313304	0.208207	0.161185	0.776681	0.311377	0.372789	0.366273	0.537668	0.268941	0.415938	-0.03788	-0.696675	-1.1562	-0.929592	0.260389	0.265667	-0.259723	-0.9351	-0.347952	0.0265686	-0.100115		0.499688	0.499255	0.499842
P22307	NA	NA	NA	NA	NA	NA	NA	NA	NA	NA	NA	NA	NA	NA	NA	NA	NA	NA	NA	NA	5163.53	45507		NA	NA	NA	NA	NA	NA	NA	NA	NA	NA	NA	NA	NA	NA	NA	NA	NA	NA	NA	NA	-2.70522	0.146238		NA	NA	NA
P22314	638716	1.78565e+06	1.2036e+06	1.87625e+06	1.75188e+06	1.18872e+06	1.55123e+06	1.09388e+06	1.37486e+06	1.30766e+06	1.98911e+06	683634	444354	326665	359295	1.75051e+06	1.88962e+06	796846	348945	635908	3.2576e+06	2.41485e+06		-0.288142	0.38142	0.0702837	0.723138	0.431492	0.159608	0.0839869	-0.117355	0.644163	0.0724853	0.429343	-0.28605	-0.443766	-0.883832	-0.504674	0.291695	0.450397	-0.14664	-0.77101	-0.357781	-0.220812	-0.922623		0.499688	0.499255	0.499842
P22392	717826	1.9155e+06	1.64745e+06	1.81777e+06	2.39703e+06	1.45507e+06	2.00463e+06	1.96407e+06	863422	1.54127e+06	2.01245e+06	412152	300207	266724	372093	2.014e+06	2.00171e+06	762632	432606	489929	547891	889743		-0.1468	0.479063	0.52019	0.669938	0.877159	0.449658	0.451697	0.746587	-0.103461	0.295902	0.452792	-1.04074	-1.03439	-1.13885	-0.431298	0.4802	0.50793	-0.192583	-0.450749	-0.755591	-1.25561	-0.811652		0.499688	0.499255	0.499842
P22415	4781.26	1864.84	28183.8	2649.69	12236.6	20835.1	11546.1	9843.62	11706.9	5213.5	20310.7	5317.93	722.744	7377.86	960.208	25966.2	10657	7630.12	2349.09	1946.45	NA	NA		-0.402389	-2.13338	1.88058	-1.81838	0.0469391	1.72776	0.184025	0.782419	0.374465	0.199999	1.33113	-0.274594	-2.46543	2.16619	0.17228	1.48642	0.0448153	0.79275	0.0948819	-0.486167	NA	NA		0.499688	0.0689494	0.0225673
P22455	0	0	0	0	8461.88	12385.6	0	0	30164.2	7.19482	0	12549.5	0	0	0	0	0	0	0	0	NA	NA		NA	NA	NA	NA	1.9309	4.7056	NA	NA	4.26562	-8.24325	NA	4.37467	NA	NA	NA	NA	NA	NA	NA	NA	NA	NA		NA	NA	NA
P22626	2.61194e+06	9.79453e+06	5.09499e+06	1.71711e+07	5.35239e+06	5.74797e+06	5.78373e+06	4.37637e+06	4.3206e+06	6.05604e+06	4.82961e+06	2.7391e+06	2.45752e+06	3.20666e+06	2.19467e+06	4.10215e+06	3.53507e+06	2.93232e+06	2.40385e+06	2.28611e+06	6.11851e+06	8.14123e+06		-0.320405	0.848364	0.139731	1.89188	0.0427672	0.402033	-0.079913	-0.140567	0.425024	0.275869	-0.370138	-0.395845	-0.0730894	0.231706	0.0158657	-0.508086	-0.662365	-0.391094	-0.0443395	-0.633314	-0.287885	-0.0346074		0.499688	0.489011	0.499842
P22695	24127.8	50775.8	55564.2	75509.1	95428	60454.5	144841	101482	87509.7	102850	121092	59380.9	32793.6	18201.5	34908.9	160945	167678	43273.7	35966.2	74714.7	354970	378724		-1.32111	-0.778847	-0.645218	-0.117706	-0.168848	-0.289359	0.491053	0.400349	0.109717	0.143729	0.352511	-0.0596379	-0.311002	-0.560584	0.348848	0.715645	0.787791	-0.229887	0.0641163	0.517993	0.481265	0.134328		0.422861	0.499255	0.499842
P22735	0	5342.72	5459.67	1401.79	51500.9	77.3827	8068.5	5720.99	686.778	5925.12	7610.65	9433.69	3167.28	1154.03	2317.03	10972.2	2488.71	7658.12	2944.38	4575.17	NA	NA		NA	0.0641255	0.0836637	-1.19984	2.82966	-6.10526	0.265286	0.6166	-3.36536	-0.00339452	0.500583	1.1198	0.325399	-0.0162745	1.02937	0.832555	-1.55646	1.39083	1.06332	0.284245	NA	NA		NA	0.499255	0.499842
P23141	14702.5	180393	23922.7	167776	35950.8	31300	43329.3	32627.7	17056.8	204827	16944.9	6764.41	7015.13	27216.5	12692.5	4722.7	9235.92	4289.12	33493.8	33537.8	4030.45	99144.1		-0.374528	2.73967	-0.43428	2.60952	-0.284962	0.351275	0.184912	0.436347	-0.900738	2.68379	-1.00537	-1.75035	-0.898489	2.0555	0.903775	-3.05052	-2.04961	-1.93168	1.90551	1.98861	-2.69835	1.45677		0.499688	0.0139239	0.499842
P23193	NA	NA	NA	NA	NA	NA	NA	NA	NA	NA	NA	NA	NA	NA	NA	NA	NA	NA	NA	NA	341944	230136		NA	NA	NA	NA	NA	NA	NA	NA	NA	NA	NA	NA	NA	NA	NA	NA	NA	NA	NA	NA	1.11447	-0.000357534		NA	NA	NA
P23246	586072	2.24755e+06	1.64338e+06	1.51901e+06	2.0001e+06	1.43777e+06	1.69375e+06	1.64482e+06	1.10653e+06	1.52474e+06	1.97466e+06	990556	652005	690986	601913	1.90889e+06	2.12599e+06	1.00273e+06	719246	776428	3.32104e+06	4.97628e+06		-0.72499	0.411543	0.223603	0.0911139	0.32084	0.129154	-0.0999773	0.175974	0.0343249	-0.00918751	0.0979913	-0.0555455	-0.191304	-0.110709	-0.0638671	0.111944	0.32093	-0.13345	-0.0134178	-0.37998	-0.370972	-0.0144979		0.499688	0.499255	0.499842
P23258	51884.7	5753.82	55831.8	7736.67	17921.6	11663.5	13306.7	8813.35	13449.5	10409.6	8350.43	47966	12819.3	6287.93	4828.5	14510.3	10654.4	8647.14	7943.33	20146.7	376737	972047		2.33789	-1.56516	1.66313	-1.10875	-0.43397	-0.275876	-0.717077	-0.728072	-0.373095	-0.895955	-1.23389	2.01574	0.815807	0.683422	0.197568	-0.523101	-0.985312	-0.0600232	0.484673	1.06543	0.188615	0.996564		0.26056	0.23282	0.0502799
P23284	58683.9	160998	122173	95095.7	210481	127689	112134	106573	88736	51835.6	50059.2	23191.1	11079.1	4488.26	5011.43	69972.9	79129	5922.94	3854.9	20896.8	106213	162337		0.860627	1.76599	1.2894	1.02245	1.73006	1.66375	0.90466	1.33134	0.904111	-0.073094	-0.157572	-0.640282	-1.06145	-1.60392	-1.56132	0.265704	0.460246	-2.28897	-2.34747	-0.492216	-0.953839	-0.848942		0.499688	0.178371	0.152639
P23368	NA	NA	NA	NA	NA	NA	NA	NA	NA	NA	NA	NA	NA	NA	NA	NA	NA	NA	NA	NA	74628.1	44764		NA	NA	NA	NA	NA	NA	NA	NA	NA	NA	NA	NA	NA	NA	NA	NA	NA	NA	NA	NA	1.89098	0.436842		NA	NA	NA
P23381	151625	691072	514787	438345	720600	450311	611506	424893	313842	429454	742154	247145	164773	150009	220505	804479	745217	291748	241094	270083	828967	656515		-1.09558	0.500049	0.261311	0.0190381	0.523853	0.197668	0.157106	-0.00483503	-0.245727	-0.189709	0.50277	-0.343411	-0.440831	-0.343137	0.356321	0.587248	0.488229	-0.0821748	0.232067	-0.161919	0.354298	-0.317742		0.496409	0.499255	0.499842
P23396	3.10158e+06	1.18243e+06	1.32586e+06	1.11792e+06	1.23926e+06	1.23673e+06	1.70477e+06	1.18207e+06	1.15061e+06	1.66414e+06	1.26805e+06	753682	536416	606890	402693	1.49167e+06	1.41169e+06	626443	593707	947087	2.46519e+06	4.0202e+06		1.96479	-0.331449	0.115455	-0.14809	-0.18165	0.118814	0.124528	-0.101794	0.286889	0.332434	-0.342349	-0.242532	-0.264398	-0.0699785	-0.438741	-0.044671	-0.0806647	-0.608733	-0.081423	0.134004	-0.656234	-0.181823		0.355294	0.499255	0.499842
P23458	518636	804626	849307	413023	600817	700520	907768	975468	726449	652667	1.14841e+06	694336	339671	449493	345539	958227	696774	609434	425164	431786	1.82687e+06	1.17366e+06		-0.0183067	-0.141095	0.184752	-0.882522	-0.540986	0.0187581	-0.0807119	0.37418	0.247188	-0.349292	0.294988	0.393721	-0.194834	0.366296	0.155205	0.0214621	-0.427279	0.160381	0.202789	-0.293201	0.832308	-0.127261		0.499688	0.499255	0.499842
P23526	598695	794703	768712	711951	1.22119e+06	621446	624157	676534	648790	825578	807113	329085	199720	168127	241684	1.06912e+06	1.30393e+06	298900	267272	263959	577635	1.00014e+06		0.450799	0.126128	0.312135	0.20003	0.782834	0.118853	-0.363738	0.114595	0.338148	0.26518	0.0546854	-0.443403	-0.708184	-0.792369	-0.086485	0.45883	0.775731	-0.614138	-0.198033	-0.749287	-0.8127	-0.306112		0.499688	0.499255	0.499842
P23528	1.31569e+06	2.70387e+06	1.62458e+06	1.43269e+06	2.27485e+06	1.61677e+06	1.80786e+06	1.64503e+06	1.48208e+06	1.70879e+06	2.0254e+06	566011	369003	594073	416208	2.17632e+06	2.26692e+06	1.00836e+06	491928	736875	1.85495e+06	5.9884e+06		0.53653	0.745316	0.264833	0.0651333	0.569872	0.363252	0.0571874	0.235523	0.519329	0.218825	0.197557	-0.82575	-0.976909	-0.266639	-0.548954	0.364888	0.473005	-0.0604452	-0.517334	-0.395816	-1.06402	0.430674		0.499688	0.499255	0.499842
P23588	2.40985e+07	5.81554e+07	3.94681e+07	2.6772e+07	3.6174e+07	4.08165e+07	5.48477e+07	5.55438e+07	2.06259e+07	4.76e+07	6.73707e+07	3.83082e+07	2.98538e+07	4.27954e+07	2.83262e+07	6.60096e+07	4.63179e+07	4.45979e+07	3.35277e+07	3.58663e+07	6.45827e+07	7.26796e+07		-0.521445	0.236816	-0.0848137	-0.739007	-0.281122	-0.046143	-0.0684266	0.290421	-0.331982	0.120661	0.272332	0.0684263	0.0393047	0.314651	0.234174	0.431988	0.0150949	0.132522	0.333948	-0.0285664	-0.179978	-0.000647687		0.499688	0.499255	0.499842
P23919	NA	NA	NA	NA	NA	NA	NA	NA	NA	NA	NA	NA	NA	NA	NA	NA	NA	NA	NA	NA	6351.15	23572.8		NA	NA	NA	NA	NA	NA	NA	NA	NA	NA	NA	NA	NA	NA	NA	NA	NA	NA	NA	NA	-1.28327	0.186878		NA	NA	NA
P23921	54243.5	45080	55570.8	19981.7	57201.6	34995.2	69040	43249.8	59792.3	24472.7	28625.2	10747.5	8093.61	707.128	2194.03	27008.3	23726.8	10098.7	2030.21	5606.94	533398	542640		1.92324	1.0301	1.23242	-0.148883	0.892357	0.901593	1.31056	1.1602	1.43691	-0.0548328	0.152005	-0.64231	-0.350728	-2.05803	-1.53496	-0.0266225	-0.212753	-0.306353	-2.08489	-1.28385	0.142129	-0.395884		0.361674	0.43458	0.173612
P24534	320991	1.18996e+06	889401	849293	1.28563e+06	558742	886827	925143	795195	797846	1.28111e+06	448762	238256	313571	236004	1.20726e+06	1.4598e+06	394714	336253	445199	2.6794e+06	4.12825e+06		-0.716984	0.397277	0.22981	0.164399	0.577132	-0.34769	-0.134913	0.253063	0.401499	-0.0568267	0.407154	-0.287598	-0.751641	-0.272567	-0.4827	0.345599	0.665204	-0.546371	-0.199228	-0.271309	-0.363965	0.00212382		0.499688	0.499255	0.499842
P24666	NA	NA	NA	NA	NA	NA	NA	NA	NA	NA	NA	NA	NA	NA	NA	NA	NA	NA	NA	NA	52536.3	132407		NA	NA	NA	NA	NA	NA	NA	NA	NA	NA	NA	NA	NA	NA	NA	NA	NA	NA	NA	NA	-0.908826	-0.00811008		NA	NA	NA
P24752	83160.4	119346	118270	117774	159730	89723.9	135765	139020	146236	127738	138573	105289	34097.6	15043.5	29199.8	140142	153993	57811.9	36018.1	49767.1	539004	239667		0.132006	0.111205	0.112283	0.174265	0.24185	-0.0816664	0.0208143	0.482215	0.507359	0.0887793	0.17548	0.417022	-0.640291	-1.27403	-0.326713	0.132913	0.283311	-0.199385	-0.331896	-0.482472	1.45616	-0.171521		0.499688	0.499255	0.499842
P24844	NA	NA	NA	NA	NA	NA	NA	NA	NA	NA	NA	NA	NA	NA	NA	NA	NA	NA	NA	NA	0	0		NA	NA	NA	NA	NA	NA	NA	NA	NA	NA	NA	NA	NA	NA	NA	NA	NA	NA	NA	NA	NA	NA		NA	NA	NA
P25205	803355	936132	1.08086e+06	631223	1.50778e+06	935962	1.78267e+06	829641	1.11236e+06	847533	1.21016e+06	749594	629953	296962	244629	1.1681e+06	1.14856e+06	656925	376896	842137	1.56243e+06	2.19272e+06		0.343769	-0.2543	0.221909	-0.573508	0.514899	0.123213	0.605409	-0.204003	0.593871	-0.267253	0.0303431	0.180416	0.398458	-0.63529	-0.717202	-0.00229789	0.00726105	-0.0779113	-0.322329	0.379236	-0.107469	0.114762		0.499688	0.499255	0.499842
P25398	163552	331141	307886	265646	307546	264121	285217	312537	332416	274310	232137	78310.2	118815	124719	80176	268151	161759	190888	133925	93289.9	248631	508873		-0.118031	0.375957	0.381882	0.191943	0.114087	0.315125	-0.073127	0.451993	0.621748	0.0127057	-0.290086	-1.20204	-0.0239574	0.409598	-0.191096	-0.126984	-0.876975	0.233591	0.3008	-0.82837	-0.262093	0.470524		0.499688	0.499255	0.499842
P25440	36102.4	29149	26087.2	83105.7	35186.8	47521.1	37394.6	16430	85592.2	9166.17	24741.3	187584	23712.9	25794.8	25321	22494.7	21907.4	27202.7	48801.8	28301.7	NA	NA		0.491429	-0.462019	-0.773847	1.13389	-0.729751	0.519559	-0.478553	-1.12411	1.10332	-2.41357	-0.92975	2.783	0.424571	1.49615	2.40006	-1.18049	-1.22329	0.344699	1.88717	0.274722	NA	NA		0.499688	0.499255	0.461474
P25685	NA	NA	NA	NA	NA	NA	NA	NA	NA	NA	NA	NA	NA	NA	NA	NA	NA	NA	NA	NA	173432	334613		NA	NA	NA	NA	NA	NA	NA	NA	NA	NA	NA	NA	NA	NA	NA	NA	NA	NA	NA	NA	-0.354447	0.267294		NA	NA	NA
P25705	1.34648e+06	2.16998e+06	2.56421e+06	1.81225e+06	2.56874e+06	1.825e+06	2.83216e+06	1.97107e+06	1.93143e+06	2.4897e+06	2.44672e+06	1.45743e+06	660452	621688	529657	4.29232e+06	3.52962e+06	1.81193e+06	740687	1.81256e+06	3.4821e+06	4.98507e+06		0.0518742	-0.0986208	0.427178	-0.113045	0.238184	0.0222603	0.200016	-0.0153786	0.431152	0.261701	-0.0502611	0.0463921	-0.641229	-0.757698	-0.726788	0.860717	0.622503	0.270645	-0.436679	0.409679	-0.2225	0.0770185		0.499688	0.499255	0.499842
P25786	377538	332990	222735	228738	269407	281161	332151	268466	170138	218681	242952	150667	146492	132742	133195	279137	420365	143518	110467	138383	740911	761644		1.01919	0.249241	-0.204683	-0.150982	-0.177535	0.294747	0.0409589	0.112766	-0.445419	-0.430339	-0.345695	-0.327839	0.175493	0.341053	0.428014	-0.186407	0.428107	-0.325078	-0.113094	-0.361423	0.57611	0.287339		0.499688	0.499255	0.499842
P25787	1.72544e+06	551437	495481	427115	676895	297385	766404	676001	513824	506276	898709	174636	288181	138831	70076.1	1.01047e+06	1.83968e+06	527108	122434	530437	537793	628642		2.19146	-0.197014	-0.142026	-0.366084	0.0907753	-0.771486	0.142945	0.329882	0.160304	-0.282138	0.430352	-1.1978	0.0405943	-0.830967	-1.70789	0.575947	1.48454	0.443281	-1.13574	0.492245	-0.186213	-0.274929		0.294005	0.499255	0.499842
P25788	550609	287868	333749	262145	335644	178324	311849	381243	286525	321120	329452	356793	290236	301288	204967	272852	418176	348776	331872	258652	1.08184e+06	1.07412e+06		0.954845	-0.67352	-0.252795	-0.61535	-0.48172	-1.05037	-0.714506	-0.0362252	-0.248934	-0.490913	-0.575792	0.334296	0.531692	0.822878	0.377196	-0.891221	-0.241003	0.313377	0.837052	-0.0959421	0.392948	0.0575382		0.499688	0.499255	0.499842
P25789	3.37361e+06	4.5708e+06	5.94238e+06	2.65325e+06	4.85001e+06	3.71661e+06	5.55888e+06	5.5428e+06	2.9128e+06	3.17139e+06	5.44101e+06	1.96425e+06	1.57085e+06	1.93055e+06	1.20747e+06	4.50815e+06	3.60044e+06	3.47457e+06	1.85094e+06	2.15337e+06	1.54577e+07	1.33507e+07		0.432952	0.0736614	0.729959	-0.52084	0.253603	0.117849	0.227585	0.573049	0.183983	-0.325612	0.171812	-0.516494	-0.361859	-0.135125	-0.49906	-0.0070494	-0.276455	0.235086	-0.0610108	-0.346796	0.856903	0.45535		0.499688	0.499255	0.454485
P26038	2528.2	19749.6	10842.7	8977.86	16628.9	12780.6	24746.3	12070.2	14394.6	22034.6	32263.3	3201.88	4869.17	2267.91	1014.47	17725.3	34613.5	9820.18	1219.41	15435.4	27935	89758.7		-1.6452	0.848434	-0.201019	-0.390293	-0.0547281	0.408791	0.746376	0.401016	0.21401	0.750725	1.36333	-1.48485	-0.0588126	-0.221048	-1.40084	0.305623	1.29795	0.682978	-1.55062	1.15807	-1.5521	-0.417846		0.336709	0.489011	0.499842
P26196	93164.6	140062	115232	88085.8	137340	99842.8	157775	121820	250682	97269.6	171967	75675.9	69065.4	30214.2	35144	158377	150767	58771	61074.6	70624.9	301584	380449		0.16224	0.222769	-0.021389	-0.358494	-0.0571198	-0.0410612	0.133779	0.154521	1.22	-0.435801	0.37633	-0.182194	0.275943	-0.452515	-0.22846	0.195448	0.128272	-0.341532	0.294042	-0.111824	-0.217351	-0.251091		0.499688	0.499255	0.499842
P26358	6621.55	4275.4	3649.1	12525.3	2530.34	20828.3	13218.9	18123.4	2049.68	18951.4	37252.6	14747.2	6770.57	6050.03	2023.9	11302.1	21603.4	7730.47	4699.88	3583.94	52548.1	70430.5		-0.121518	-1.30101	-1.68683	0.207083	-2.73316	1.25957	-0.0583625	1.15683	-2.57417	0.646659	1.71465	0.899419	0.5405	1.37629	-0.224814	0.795505	0.712158	0.438568	0.611502	-0.913345	-0.11727	-0.281506		0.499688	0.34303	0.0825857
P26368	183069	625394	481845	494491	536533	368571	479020	534101	621157	792977	847442	769611	302944	246772	243206	1.00748e+06	1.088e+06	427890	339900	404156	1.75993e+06	1.83877e+06		-1.2047	-0.131135	-0.280735	-0.239248	-0.336836	-0.557126	-0.655264	-0.137521	0.379689	0.31018	0.226961	0.923538	0.0133846	-0.126662	0.0213191	0.472682	0.609627	0.0193972	0.258006	-0.0137351	0.429257	0.186363		0.460767	0.499255	0.499842
P26373	25930.6	88959.3	73420.8	87479.3	63820.9	90307.5	151763	98154.4	47860	281419	156941	74039.2	30059.5	45213.1	43568.5	182839	168393	71810.4	47231.9	159652	782441	1.7958e+06		-1.57874	-0.286846	-0.502205	-0.187515	-0.994482	-0.0146144	0.254489	0.00152024	-1.04504	1.31763	0.40981	-0.0314498	-0.794478	0.259119	0.226259	0.580145	0.460737	0.0973307	0.0576322	1.25883	-0.00263948	0.878661		0.357914	0.499255	0.499842
P26583	252288	979641	402325	381440	505322	745758	518393	901462	483845	748106	816705	684633	547401	719518	664027	564651	781657	477112	140417	246860	271159	244174		-0.781085	0.579906	-0.546721	-0.628852	-0.446208	0.507665	-0.529479	0.674	-0.0455676	0.193747	0.205327	0.729984	0.904704	1.55155	1.55678	-0.380043	0.118379	0.209405	-1.01179	-0.73649	-0.205348	-0.68677		0.499688	0.499255	0.499842
P26599	1.07696e+06	2.54188e+06	1.78574e+06	2.28091e+06	2.2034e+06	1.93719e+06	2.61641e+06	2.23044e+06	1.6596e+06	2.30458e+06	3.56342e+06	1.83863e+06	1.54633e+06	1.59714e+06	897322	3.83417e+06	3.65777e+06	2.36635e+06	1.17295e+06	1.97143e+06	2.94871e+06	3.47683e+06		-0.566725	-0.14435	-0.393843	-0.0595608	-0.26978	-0.174251	-0.205922	-0.114997	-0.0582008	-0.135935	0.221413	0.0986117	0.332528	0.341911	-0.234128	0.41151	0.397141	0.373449	-0.0416134	0.240633	-0.516489	-0.497395		0.499688	0.499255	0.499842
P26639	384727	1.14542e+06	585015	1.93838e+06	808465	735305	697223	601238	270352	1.0971e+06	1.1483e+06	546111	312899	281807	315935	945719	1.09578e+06	415895	407904	589931	2.69512e+06	1.60473e+06		-0.359189	0.470433	-0.278	1.51058	-0.00416601	0.181119	-0.380313	-0.25917	-1.12107	0.520959	0.380775	0.127934	-0.226044	-0.25553	0.103343	0.094756	0.342004	-0.32371	0.224651	0.262786	0.756598	-0.310117		0.499688	0.499255	0.499842
P26640	278154	557848	431942	285427	500876	308947	479214	398929	309252	387068	593170	179024	124676	96216.5	122096	641917	602730	250938	122163	208043	765650	1.07853e+06		0.0933781	0.476975	0.290778	-0.327992	0.271332	-0.0704326	0.0861429	0.194528	0.0163817	-0.0562912	0.463522	-0.535655	-0.563707	-0.705065	-0.228593	0.543628	0.464105	-0.0131037	-0.484673	-0.258437	-0.212475	-0.0288113		0.499688	0.499255	0.499842
P26641	1.27586e+06	3.44778e+06	2.0504e+06	1.21469e+06	2.51615e+06	2.30188e+06	3.3367e+06	2.40573e+06	1.67978e+06	2.29042e+06	4.00823e+06	1.35331e+06	1.11278e+06	1.37809e+06	973724	3.65041e+06	4.47774e+06	2.15898e+06	1.20146e+06	1.60065e+06	6.87907e+06	6.67447e+06		-0.284212	0.350002	-0.150394	-0.966206	-0.0301817	0.116729	0.186741	0.0350242	0.0200174	-0.107222	0.429543	-0.333259	-0.13281	0.134143	-0.0854588	0.378221	0.740948	0.261508	0.0237411	-0.0467528	-0.170422	-0.429789		0.499688	0.499255	0.499842
P26885	NA	NA	NA	NA	NA	NA	NA	NA	NA	NA	NA	NA	NA	NA	NA	NA	NA	NA	NA	NA	7463.67	9210.35		NA	NA	NA	NA	NA	NA	NA	NA	NA	NA	NA	NA	NA	NA	NA	NA	NA	NA	NA	NA	0.675124	0.397227		NA	NA	NA
P27216	0	0	0	0	0	0	0	0	0	0	0	0	0	0	0	0	0	0	0	0	0	0		NA	NA	NA	NA	NA	NA	NA	NA	NA	NA	NA	NA	NA	NA	NA	NA	NA	NA	NA	NA	NA	NA		NA	NA	NA
P27348	789044	1.34029e+06	1.16908e+06	962043	1.35122e+06	999282	1.19571e+06	1.00606e+06	1.03655e+06	997460	1.34602e+06	937183	725769	584284	449071	889403	1.00387e+06	766963	523059	750817	2.4038e+06	2.60093e+06		0.129197	0.071774	0.13821	-0.151509	0.154089	0.0168404	-0.188977	-0.124417	0.309459	-0.221069	-0.0255166	0.305154	0.404508	0.133602	-0.0370279	-0.606467	-0.386516	-0.0683268	-0.0462665	0.00657609	0.11703	-0.0361008		0.499688	0.499255	0.499842
P27449	1779.77	14052.2	0	60093.5	62778.2	19374.3	21975.1	18827.9	11943.2	7459.19	5961.03	316945	0	0	0	88.3439	2750.54	0	0	1456.28	NA	NA		-1.65198	-0.0844127	NA	2.07065	1.5497	1.69546	0.15151	0.683816	-0.521537	-0.269938	-0.554827	5.10515	NA	NA	NA	-7.24654	-3.01683	NA	NA	-1.83774	NA	NA		0.335972	0.499255	NA
P27635	208983	49921.7	33869.2	65312.2	32628.7	62566	199479	121574	32698	284105	324076	115218	34653.5	100197	41041	565626	463261	259974	52669	166827	90220.9	318155		1.18433	-1.49002	-2.01435	-0.976447	-2.36241	-0.911917	0.308314	-0.0263203	-1.97941	0.98262	1.14212	0.270013	-0.928433	1.13642	-0.185411	1.91285	1.62073	1.68476	-0.110552	0.98581	-1.84282	-0.338284		0.499688	0.262196	0.0295236
P27694	70337.8	14024.6	23436.8	29590	28529.7	28744.2	28131.1	17996.6	24151.6	20268.8	23308.5	24518	20304.3	8785.93	6306.73	42408.6	24933.1	29036.8	13984	22252.9	2.1395e+06	505078		1.90765	-1.09373	-0.407554	0.054572	-0.487838	0.219114	-0.388502	-0.539341	-0.270031	-0.70407	-0.528031	0.211338	0.617038	0.200181	-0.420578	0.283077	-0.496256	0.858035	0.356228	0.377247	2.11627	-0.568291		0.362848	0.429971	0.499842
P27695	287716	292878	221295	109533	297875	187357	248451	286635	114605	242821	363010	113242	92458.4	97749.4	69673	425995	448795	214999	110108	148169	163996	150083		0.817163	0.297315	-0.021151	-1.02913	0.149145	-0.101531	-0.185022	0.418024	-0.887963	-0.0764155	0.474733	-0.56468	-0.302513	0.168758	-0.289694	0.658694	0.737724	0.518728	0.113882	-0.0410941	-0.58977	-1.05901		0.499688	0.499255	0.499842
P27708	453640	468510	763279	862706	900915	628736	864022	508271	789167	733170	788183	1.13876e+06	539824	317251	269848	801022	1.37425e+06	540907	565768	872694	2.692e+06	6.39576e+06		-0.2899	-1.06054	-0.0746649	0.11323	-0.0312618	-0.246819	-0.251546	-0.70947	0.298298	-0.263642	-0.382621	1.02531	0.390733	-0.304916	-0.343445	-0.34299	0.493103	-0.140348	0.50658	0.653374	0.443763	1.44592		0.499688	0.432675	0.499842
P27797	1.92379e+06	3.73839e+06	3.44136e+06	3.37916e+06	4.30362e+06	2.80474e+06	4.03781e+06	2.86598e+06	2.01329e+06	2.76084e+06	5.009e+06	1.06689e+07	1.26455e+06	1.86901e+06	1.16869e+06	3.90988e+06	3.73845e+06	2.13927e+06	1.40626e+06	4.05958e+06	3.91113e+06	5.50163e+06		-0.227379	-0.0655789	0.0798604	0.00725926	0.233938	-0.134492	-0.078896	-0.245074	-0.222651	-0.369424	0.215379	2.17895	-0.504087	0.00993751	-0.370768	-0.0574705	-0.0615616	-0.309994	-0.295509	0.776024	-0.81851	-0.50811		0.499688	0.499255	0.499842
P27816	2181.38	49940.5	20257.7	21828.4	52604.3	18339.3	30371	34733.4	17295.8	29067.2	55093.6	24695.4	14366	4463.5	6175.96	54281.4	52047.5	23512.6	9395.75	16741.5	256725	224865		-2.95048	1.0815	-0.393044	-0.125141	0.633593	-0.164238	-0.034961	0.736917	-0.537025	0.0818155	1.01407	0.477285	0.409959	-0.414358	-0.0487231	0.89062	0.829264	0.857605	0.128437	0.23463	0.0743162	-0.706792		0.0462627	0.432212	0.499842
P27824	1.87112e+06	2.86545e+06	2.79888e+06	3.36034e+06	3.37662e+06	2.38332e+06	5.98098e+06	3.70069e+06	1.21868e+06	2.52959e+06	3.79564e+06	1.71818e+07	5.96651e+06	6.84216e+06	821374	1.4793e+07	3.84034e+06	3.15787e+06	3.52756e+06	1.20761e+07	1.76957e+06	3.24119e+06		-0.601043	-0.788281	-0.555592	-0.331015	-0.453479	-0.706045	0.175384	-0.192985	-1.29076	-0.827513	-0.526714	2.5547	1.47001	1.60212	-1.22829	1.59465	-0.348295	-0.0633016	0.740853	2.06414	-1.49861	-0.790823		0.499688	0.499255	0.499842
P28066	1.23209e+06	559752	561181	649344	744082	506281	595496	668797	500107	418454	489981	281516	256172	202845	234846	671548	791019	368854	237210	342221	1.5428e+06	1.81749e+06		1.69865	-0.23535	0.00886772	0.229534	0.213938	-0.0224419	-0.26841	0.258109	0.123194	-0.575888	-0.526922	-0.509415	-0.173494	-0.36087	0.0294226	-0.0678046	0.199175	-0.140437	-0.217046	-0.198465	-0.0457747	-0.108332		0.401491	0.499255	0.499842
P28070	996721	308400	320159	108094	401502	160448	284661	369400	278611	226196	205418	98134.2	61087.8	47917.4	60867.9	380109	647891	64515	52902.2	165922	450387	865162		2.65637	0.340285	0.528346	-1.06698	0.605892	-0.343352	0.00761228	0.78388	0.468092	-0.187114	-0.395164	-0.775138	-0.930073	-0.961039	-0.533637	0.471621	1.26872	-1.31136	-1.00741	0.107046	-0.205711	0.435678		0.190735	0.499255	0.499842
P28072	896098	287933	215353	171575	298871	153367	307810	208714	216481	190936	211728	66434.9	115368	58663.6	60656.7	218764	468708	149071	64529.2	142810	1.03801e+06	1.04881e+06		2.5168	0.235339	-0.0444066	-0.371772	0.18991	-0.398773	0.136487	-0.0534362	0.133562	-0.420512	-0.344331	-1.33235	0.0293732	-0.676156	-0.538406	-0.341823	0.798763	-0.0640531	-0.706986	-0.106813	0.301446	-0.0130252		0.22015	0.499255	0.499842
P28074	1.23204e+06	300383	836755	239919	529880	328598	724349	428988	272542	201732	466356	60261.4	126864	29861.9	31997.4	523120	893227	158443	51221	255330	481341	469792		2.54886	-0.150837	1.53178	-0.318646	0.600721	0.289982	0.965344	0.573723	0.0407373	-0.780553	0.384014	-1.91796	-0.273416	-2.13357	-1.93753	0.509684	1.31377	-0.420397	-1.49726	0.312524	-0.0481738	-0.414016		0.216377	0.499255	0.0783053
P28288	200192	57037.2	144728	97174.5	136019	99078.6	171153	83948.3	163336	184980	140285	126225	179728	33659.8	18592.1	150896	155559	104263	32350.2	425745	317915	480895		1.08322	-1.33631	0.0798855	-0.446877	-0.318794	-0.279966	0.0244928	-0.620733	0.341378	0.294532	-0.151965	0.34685	1.47884	-0.473254	-1.37484	-0.102192	-0.0488126	0.307882	-0.858459	2.34844	0.904063	1.1204		0.499688	0.332141	0.499842
P28289	0	0	0	0	0	0	0	0	0	0	0	0	0	0	0	0	0	0	0	0	327439	16865		NA	NA	NA	NA	NA	NA	NA	NA	NA	NA	NA	NA	NA	NA	NA	NA	NA	NA	NA	NA	4.73881	-0.64915		NA	NA	NA
P28331	174721	92519.8	118596	117754	151701	76572	138422	68097.2	139443	196064	136476	72021.2	150727	32042.8	45913.2	204138	186412	101907	63452.8	141011	1.20867e+06	1.11456e+06		0.849596	-0.638521	-0.199474	-0.155692	-0.117322	-0.670477	-0.292814	-0.952616	0.134904	0.369637	-0.208254	-0.483093	1.1941	-0.661867	-0.105029	0.333864	0.201835	0.208695	0.0872839	0.66417	1.61106	1.1351		0.499688	0.499255	0.499842
P28340	NA	NA	NA	NA	NA	NA	NA	NA	NA	NA	NA	NA	NA	NA	NA	NA	NA	NA	NA	NA	10417.6	29012.4		NA	NA	NA	NA	NA	NA	NA	NA	NA	NA	NA	NA	NA	NA	NA	NA	NA	NA	NA	NA	1.10388	2.12763		NA	NA	NA
P28482	599.28	1140.84	0	2243.17	81.9352	5217.08	4539.69	7729.26	3466.14	8759.46	5041.54	2381.48	899.064	0	649.685	6692.68	2657.01	1173.04	147.412	2438.28	1871.75	16868.5		-1.33469	-0.267272	NA	0.387346	-4.83626	1.20031	0.377815	2.02742	-0.029423	1.56675	0.857089	-0.124386	-0.665042	NA	-0.0309869	1.06197	-0.498177	-0.483118	-1.45153	0.176286	-1.76968	0.929904		0.421101	0.499255	NA
P28838	NA	NA	NA	NA	NA	NA	NA	NA	NA	NA	NA	NA	NA	NA	NA	NA	NA	NA	NA	NA	2805.09	11956.8		NA	NA	NA	NA	NA	NA	NA	NA	NA	NA	NA	NA	NA	NA	NA	NA	NA	NA	NA	NA	-2.51413	-0.821974		NA	NA	NA
P29144	5967.28	11585	21827.5	3227.1	16839.9	15399.6	12299.9	13992.9	18161.1	16759.7	15791.8	12281.2	4368.81	3404.27	2466.63	7998.37	15662.2	6293.07	2749.78	4093.65	45172.3	113999		-0.27219	0.147924	0.932594	-1.81782	0.0575252	0.77953	-0.2006	0.71244	0.653935	0.437214	0.392898	0.609246	-0.125951	0.475625	0.0126275	-0.785111	0.211954	0.114974	-0.24961	-0.721765	-1.10268	-0.328004		0.499688	0.499255	0.355927
P29401	782798	2.39879e+06	1.01293e+06	1.15384e+06	1.48168e+06	1.2698e+06	1.85809e+06	1.65331e+06	753127	1.07138e+06	1.79763e+06	592675	275283	299768	231083	1.21729e+06	1.80019e+06	834258	324884	501302	2.76294e+06	2.49785e+06		0.203493	1.01842	0.00760907	0.199656	0.374708	0.454793	0.549055	0.695386	-0.0756701	-0.0310056	0.483003	-0.296644	-0.956861	-0.788905	-0.950367	-0.0561823	0.567367	0.132397	-0.675592	-0.512833	-0.169243	-0.585718		0.499688	0.436152	0.499842
P29508	223.879	0	365.599	5077.62	134090	2948.3	0	241.394	821.106	0	332.544	1619.65	2265.6	1554.16	532.223	364.544	335.712	890.872	156.413	140.136	NA	NA		-2.28573	NA	-1.71467	1.47666	6.33618	1.40799	NA	-1.01477	-1.27591	NA	-2.11149	0.067371	1.68633	2.51935	1.65062	-2.21055	-2.59871	1.21034	-1.3473	-2.29485	NA	NA		0.158097	NA	0.0755281
P29692	767109	2.70534e+06	1.17558e+06	2.07753e+06	1.11934e+06	1.33656e+06	1.76221e+06	1.23195e+06	274955	1.04595e+06	1.40758e+06	648452	683919	1.04642e+06	715909	1.28274e+06	1.32995e+06	1.12348e+06	964690	747213	2.65675e+06	5.57724e+06		-0.274717	0.756926	-0.21413	0.634098	-0.486921	0.0893941	0.0275822	-0.182761	-2.02839	-0.51146	-0.317728	-0.602276	-0.0437428	0.6451	0.299343	-0.422502	-0.32953	0.14188	0.505235	-0.360739	1.21697	2.04831		0.499688	0.499255	0.499842
P29966	339326	1.15728e+06	828899	1.19795e+06	1.07288e+06	422194	720056	798877	833120	1.0751e+06	1.64315e+06	771827	438052	342617	410526	1.14515e+06	1.18943e+06	742656	353668	452440	920383	1.40938e+06		-0.792312	0.209357	-0.0255314	0.527471	0.155753	-0.913504	-0.596007	-0.111994	0.309397	0.233535	0.634075	0.371906	0.005688	-0.271625	0.202586	0.115424	0.206073	0.253822	-0.268442	-0.397631	-1.15515	-0.804214		0.499688	0.499255	0.499842
P30040	15064.8	59378.3	39163.9	79455.7	59498.2	39105	53399.7	53319.7	64698.5	93944.1	49152.5	5451.99	7985.99	6843.55	4705.45	50359.6	57504.3	9965.24	3865.68	14393.6	443969	351585		-0.65797	0.774649	0.0663799	1.2432	0.31152	0.400224	0.278754	0.801219	0.907857	1.29318	0.299044	-2.30724	-1.04448	-0.421747	-1.10901	0.251059	0.458414	-1.00329	-1.81977	-0.546165	0.773083	-0.120699		0.499688	0.499255	0.499842
P30041	22099.4	124878	41252.3	61319.1	66620	141916	223810	360747	24570.5	362646	287768	14710.2	42405.8	83263.2	22037.1	398192	365747	131576	16804.8	95480.2	3.85358e+06	2.3708e+06		-1.91878	0.0943893	-1.42919	-0.815189	-0.978406	0.567644	0.742871	1.84187	-2.06296	1.60644	1.20256	-2.50907	-0.380196	0.967667	-0.945339	1.63571	1.51205	0.847769	-1.61653	0.379983	0.756526	-0.296568		0.254647	0.499255	0.152639
P30042	25087.8	34115.4	21821.1	26358.5	39286.7	24318.4	36694.8	20722.1	17965.8	26798.4	27592.4	17936.8	5344.29	2786.86	4114.06	23084.9	25429.4	11949.7	8163.75	10019.6	198044	294916		0.91168	0.738878	-0.0709763	0.374775	0.402614	0.476303	0.456531	0.196177	-0.274572	0.173405	0.203454	0.2149	-0.832196	-0.877557	-0.401111	-0.169184	-0.0273902	0.0772795	0.166717	-0.312208	-0.30806	-0.311286		0.499688	0.499255	0.499842
P30048	155571	490456	360555	438564	505909	293173	371783	373539	316269	354293	354304	71678.5	25671.5	12692.4	36377.3	432010	462170	101484	56735.7	81448.2	506128	1.18314e+06		-0.0418695	1.08352	0.769905	1.07552	1.01788	0.615007	0.46668	0.862201	0.734709	0.545491	0.473718	-1.17516	-2.1576	-2.89308	-1.24479	0.721435	0.827195	-0.58254	-0.846329	-0.891984	-0.577183	0.356314		0.499688	0.432212	0.433996
P30049	0	0	0	0	0	0	0	0	0	0	0	0	0	0	0	0	0	0	0	0	844107	695004		NA	NA	NA	NA	NA	NA	NA	NA	NA	NA	NA	NA	NA	NA	NA	NA	NA	NA	NA	NA	0.28419	-0.379088		NA	NA	NA
P30050	589926	1.1118e+06	1.04815e+06	657108	1.15576e+06	631793	984422	768022	605757	1.11637e+06	976096	341198	201775	412412	296693	1.43581e+06	1.15988e+06	544675	389825	549157	812293	1.91104e+06		0.118657	0.265122	0.429575	-0.258848	0.368016	-0.204889	-0.0269033	-0.0558798	-0.0789965	0.387749	-0.0220986	-0.732191	-1.03898	0.147517	-0.152193	0.556099	0.267248	-0.0839321	-0.00415157	-0.00372043	-0.73827	0.240315		0.499688	0.499255	0.499842
P30084	7848.8	102786	64723.7	63802.5	94797.7	59729.9	94600.6	89071.4	67750.6	68168	80687.5	21619.6	11512.9	4578.51	26287.7	66284.1	92241.1	28602.2	26610.9	17158.2	172503	325090		-2.32361	0.918859	0.187584	0.255538	0.39807	0.348141	0.484528	0.874917	0.340718	0.163967	0.38193	-0.922031	-1.19677	-1.82427	0.670403	0.0217953	0.52558	-0.148828	0.317564	-0.981049	-0.5837	-0.1436		0.149522	0.459435	0.499842
P30085	46740.8	133393	74091.7	65307.8	92699.1	101025	88088.9	95103.2	123511	57852.5	59874.1	79707.1	55069.2	67870.5	93196.2	63612.3	61175.8	38676.6	113774	50853.4	14532.9	34531.7		-0.527546	0.421211	-0.548986	-0.607083	-0.594897	0.255518	-0.539037	0.106394	0.306263	-0.989332	-0.967677	0.122982	0.273741	1.44964	1.79094	-0.964455	-1.01339	-0.53855	1.66355	-0.225618	-0.523838	0.211415		0.499688	0.499255	0.499842
P30086	976050	1.69879e+06	1.05295e+06	1.26278e+06	1.98778e+06	947174	1.67313e+06	1.5142e+06	303769	1.62287e+06	1.83308e+06	644808	389743	385835	268377	1.4208e+06	1.79672e+06	593577	591792	801349	1.73795e+06	2.83083e+06		0.569162	0.542541	0.102702	0.371348	0.849326	0.0561453	0.430517	0.602098	-1.38917	0.624234	0.549566	-0.13373	-0.402102	-0.375792	-0.690233	0.211265	0.601923	-0.336469	0.2541	0.22253	-0.941359	-0.481985		0.499688	0.499255	0.499842
P30101	695510	1.61695e+06	1.07332e+06	1.11854e+06	1.44649e+06	967003	1.85959e+06	1.15146e+06	671144	1.46686e+06	1.89968e+06	689402	304731	206198	262767	1.44219e+06	1.53011e+06	711778	334285	499478	4.10986e+06	4.54774e+06		0.11852	0.517844	0.182161	0.239274	0.427951	0.136533	0.637617	0.243503	-0.150747	0.525269	0.648847	0.0132415	-0.719554	-1.27021	-0.678536	0.284937	0.416038	-0.0229871	-0.548296	-0.431724	-0.109748	-0.22112		0.499688	0.499255	0.499842
P30153	211605	390658	356026	462038	411922	300215	367151	344042	299800	423224	381912	70181.8	147850	87481.1	86296.6	578628	514934	214553	130620	252792	655040	721785		-0.139908	0.156135	0.18906	0.580217	0.158236	0.0804588	-0.119635	0.170146	0.126533	0.253573	0.00854165	-1.75667	-0.11902	-0.624913	-0.541811	0.583542	0.420434	-0.0484728	-0.183221	0.222736	0.092489	-0.0924528		0.499688	0.499255	0.499842
P30154	NA	NA	NA	NA	NA	NA	NA	NA	NA	NA	NA	NA	NA	NA	NA	NA	NA	NA	NA	NA	3150.05	6234.98		NA	NA	NA	NA	NA	NA	NA	NA	NA	NA	NA	NA	NA	NA	NA	NA	NA	NA	NA	NA	0.509239	1.03562		NA	NA	NA
P30405	354307	1.27185e+06	905841	3.05215e+06	2.53702e+06	1.06908e+06	868647	831617	616875	922695	1.71896e+06	1.89002e+06	801879	491222	1.78157e+06	1.49691e+06	1.39283e+06	968187	6.24854e+06	954632	1.21426e+06	1.62948e+06		-1.52381	-0.480311	-0.710318	1.09102	0.624183	-0.355075	-1.13566	-0.881922	-0.911352	-0.804281	-0.142695	0.871457	0.0783575	-0.626609	1.52436	-0.29935	-0.362598	-0.209856	3.16594	-0.109466	-0.653181	-0.474873		0.365192	0.499255	0.490743
P30419	34313.3	123722	67102.8	81128.3	123190	82283.5	111488	79141.9	57034.2	160080	146161	51808	33369.3	24375.9	32898	172685	245660	56801.6	41386.4	63162.1	22736.4	11432.1		-0.903794	0.380916	-0.650765	-0.218765	-0.13565	0.0211117	-0.13968	-0.089972	-0.798893	0.578318	0.420489	-0.462	-0.389719	0.046279	0.368608	0.570986	1.09925	0.11722	0.268202	0.164823	0.817106	-0.780372		0.499688	0.499255	0.499842
P30499	NA	NA	NA	NA	NA	NA	NA	NA	NA	NA	NA	NA	NA	NA	NA	NA	NA	NA	NA	NA	0	0		NA	NA	NA	NA	NA	NA	NA	NA	NA	NA	NA	NA	NA	NA	NA	NA	NA	NA	NA	NA	NA	NA		NA	NA	NA
P30519	4646.27	5435.9	5404.23	34195.7	11892.5	8103.46	8915.86	3613.6	262798	10.084	1.79266	1871.88	3524.68	2310.18	3179.15	3032.65	2994.32	2947.36	4798.81	4014.33	6399.31	1218.39		0.210849	0.539866	0.607536	2.92522	1.06425	1.36575	0.891995	0.404542	5.93045	-9.00477	-10.4279	-0.964632	0.885237	1.47295	1.85735	-0.608193	-0.808437	0.401741	2.22352	0.435917	0.956282	-1.06556		0.499688	0.499255	0.499842
P30520	79468.4	187059	175902	154430	266635	135996	190462	161223	224207	127935	242386	120408	84675.1	88296.2	85477.8	205596	254065	74026.1	48908	75863.3	535273	406226		-0.604043	0.12418	0.128792	-0.0250945	0.474658	-0.0859432	-0.0881688	0.05453	0.599537	-0.537562	0.366981	0.0181583	0.0593019	0.514934	0.510125	0.0677055	0.384157	-0.572151	-0.598952	-0.54363	0.128479	-0.620623		0.499688	0.499255	0.499842
P30533	0	0	0	0	0	0	0	0	0	0	0	0	0	0	0	0	0	0	0	0	20654	2380.96		NA	NA	NA	NA	NA	NA	NA	NA	NA	NA	NA	NA	NA	NA	NA	NA	NA	NA	NA	NA	1.02412	-3.0707		NA	NA	NA
P30566	21031.4	51270	59382.1	33810.7	73906.7	45591.1	34204.5	53524.3	53863.4	18959.7	36030.8	8076.46	7220.55	6103.21	10997.4	32651.2	64383.7	8743.66	12203.9	12871	57916.8	124320		0.0179021	0.712066	0.774269	0.10632	0.69013	0.773554	-0.293718	0.98052	0.708033	-0.984322	-0.0368464	-1.6153	-1.01411	-0.336153	0.453006	-0.297222	0.709936	-1.02079	0.154512	-0.581198	-0.177329	0.353456		0.499688	0.499255	0.433996
P30622	0	0	0	0	0	0	0	0	0	0	0	0	0	0	0	0	0	0	0	0	2616.66	1331.97		NA	NA	NA	NA	NA	NA	NA	NA	NA	NA	NA	NA	NA	NA	NA	NA	NA	NA	NA	NA	1.26735	-0.335746		NA	NA	NA
P30626	NA	NA	NA	NA	NA	NA	NA	NA	NA	NA	NA	NA	NA	NA	NA	NA	NA	NA	NA	NA	6582.85	9032.9		NA	NA	NA	NA	NA	NA	NA	NA	NA	NA	NA	NA	NA	NA	NA	NA	NA	NA	NA	NA	-0.887437	-1.01191		NA	NA	NA
P30837	0.00466489	4362.32	9196.66	8987.79	13709.7	8712.51	7066.74	5915.66	10454.8	14996.7	13.5963	16076.2	16717.5	830.594	0	0	45291.4	2698.1	5.44949	11777	135170	142947		-18.7027	0.435185	1.46916	1.31446	1.50428	1.68966	1.76442	1.28617	1.49016	2.02215	-8.3043	2.66897	3.53037	1.18686	NA	NA	3.48686	1.5479	-6.64952	3.49242	0.917431	0.403426		1.19e-66	0.499255	0.0949675
P30876	2488.01	11218.8	8292.12	13581.8	22536.9	17659.2	39214.3	18262.2	22257.4	12880.9	8513.39	21306.3	12438.4	486.126	4140.61	7359.17	11826.1	1922	4190.04	4324.64	0	0		-1.76579	0.0751211	-0.510016	0.205329	0.45974	0.966949	1.52306	1.17411	0.884563	0.00216247	-0.517471	1.36059	1.35906	-1.40029	0.829551	-0.9371	-0.279353	-1.75538	0.43862	-0.769374	NA	NA		0.294005	0.499255	0.499842
P31040	35271	18300.5	50522.5	15847.2	69449.6	37666.6	127750	89875.4	87959.3	81602.9	51583.5	39146.8	38957.8	9549.97	25067.6	22330.7	19854.7	18137.1	13382.6	14076.7	519488	489525		0.226898	-1.34091	0.112789	-1.51327	0.221568	-0.0263885	1.23198	1.2025	1.02616	0.733876	0.0187859	0.268254	0.932643	-0.378442	0.940837	-1.29888	-1.46178	-0.504382	-0.379129	-0.956894	0.821511	0.215758		0.499688	0.331639	0.499842
P31150	218699	798676	637409	492372	875774	560233	783842	719939	469873	467591	780579	298915	238854	415203	336625	751457	881579	540827	363904	366780	61504.1	47334.9		-1.05891	0.271843	0.0918367	-0.282892	0.31226	0.0495237	0.0482883	0.309688	-0.187612	-0.56552	0.116853	-0.571649	-0.366643	0.752046	0.530698	0.0146459	0.259771	0.372902	0.386507	-0.18272	-0.62134	-1.34071		0.496595	0.499255	0.499842
P31151	0	0	0	0	70661	2777.09	0	0	0	4960.1	0	0	0	0	0	0	0	0	0	0	NA	NA		NA	NA	NA	NA	2.65104	-1.60918	NA	NA	NA	-1.04185	NA	NA	NA	NA	NA	NA	NA	NA	NA	NA	NA	NA		NA	NA	NA
P31153	1.09168e+06	3.14406e+06	2.62238e+06	1.13636e+06	2.4904e+06	2.03233e+06	2.93004e+06	2.69245e+06	1.19302e+06	2.09968e+06	2.3181e+06	1.02943e+06	650299	1.2304e+06	1.25816e+06	2.6472e+06	2.5456e+06	1.32223e+06	4.03348e+06	1.11782e+06	6.05177e+06	4.98248e+06		-0.354721	0.359946	0.367026	-0.903052	0.0995576	0.0879541	0.15526	0.354703	-0.372539	-0.0853026	-0.2259	-0.568101	-0.760787	0.156929	0.463716	0.0485581	0.0441982	-0.295708	1.98918	-0.406722	0.573326	0.0525249		0.499688	0.499255	0.499842
P31350	NA	NA	NA	NA	NA	NA	NA	NA	NA	NA	NA	NA	NA	NA	NA	NA	NA	NA	NA	NA	222.774	4180.93		NA	NA	NA	NA	NA	NA	NA	NA	NA	NA	NA	NA	NA	NA	NA	NA	NA	NA	NA	NA	-3.81904	-0.805962		NA	NA	NA
P31689	2.25886e+06	1.84536e+06	1.63071e+06	1.36542e+06	1.45498e+06	1.82978e+06	2.63539e+06	1.31151e+06	927073	1.51179e+06	1.54834e+06	1.7347e+06	1.26297e+06	1.25516e+06	980389	1.27475e+06	1.29863e+06	1.37829e+06	948800	1.94251e+06	2.08185e+06	3.1051e+06		1.00798	-0.154457	-0.0617964	-0.335869	-0.427998	0.21638	0.287353	-0.432438	-0.519113	-0.295569	-0.530621	0.512303	0.524274	0.525259	0.399511	-0.763585	-0.689893	0.0788526	0.130716	0.717396	0.18779	0.529648		0.499688	0.499255	0.499842
P31749	NA	NA	NA	NA	NA	NA	NA	NA	NA	NA	NA	NA	NA	NA	NA	NA	NA	NA	NA	NA	0	0		NA	NA	NA	NA	NA	NA	NA	NA	NA	NA	NA	NA	NA	NA	NA	NA	NA	NA	NA	NA	NA	NA		NA	NA	NA
P31751	314532	271397	200646	130044	252249	193571	320687	309669	133132	194017	428562	176020	82444.3	158616	124588	349557	371526	217032	148845	149193	205887	319089		0.816146	0.0430646	-0.294933	-0.908917	-0.221257	-0.185958	0.0624771	0.399616	-0.781794	-0.541623	0.5843	-0.0367591	-0.606323	0.733224	0.428507	0.229253	0.321767	0.388127	0.420901	-0.167755	-0.366165	-0.0479166		0.499688	0.499255	0.499842
P31930	NA	NA	NA	NA	NA	NA	NA	NA	NA	NA	NA	NA	NA	NA	NA	NA	NA	NA	NA	NA	51523.6	61531.3		NA	NA	NA	NA	NA	NA	NA	NA	NA	NA	NA	NA	NA	NA	NA	NA	NA	NA	NA	NA	-0.159805	-0.513396		NA	NA	NA
P31939	48188.9	1.25685e+06	978428	632908	779549	1.1331e+06	1.59961e+06	1.53583e+06	668518	494600	1.30238e+06	606378	702757	1.31956e+06	935835	802092	838317	1.19916e+06	768859	972216	279248	378303		-3.85813	0.22269	0.0940289	-0.549333	-0.456041	0.433343	0.460472	0.749683	-0.180651	-1.06502	0.182381	-0.109286	0.585688	1.67235	1.33885	-0.5448	-0.454402	0.867898	0.785351	0.613063	-1.14664	-0.997828		0.00433294	0.499255	0.499842
P31942	96606.7	161217	144175	120792	152469	123443	147849	134523	129455	148413	173762	126991	99750.8	98410.6	90009.4	151072	147821	112807	104031	85925.5	433835	493444		-0.25589	-0.0360908	-0.131156	-0.340891	-0.331272	-0.182953	-0.417721	-0.16317	-0.197022	-0.267804	-0.0723523	0.138086	0.356422	0.780481	0.67079	-0.337398	-0.366833	0.134495	0.597875	-0.296889	0.543676	0.381397		0.499688	0.499255	0.499842
P31943	4.42762e+06	6.3116e+06	6.84926e+06	4.98373e+06	5.93519e+06	5.00807e+06	6.4101e+06	5.28879e+06	5.37647e+06	4.96275e+06	6.65813e+06	6.07112e+06	3.13909e+06	4.4576e+06	3.37903e+06	7.82572e+06	6.43018e+06	4.78296e+06	3.76066e+06	4.6152e+06	9.09294e+06	1.18246e+07		0.068536	-0.17274	0.208346	-0.328138	-0.16646	-0.181232	-0.30871	-0.232708	0.410318	-0.390529	-0.270879	0.389857	-0.115097	0.291501	0.25802	0.0821683	-0.138828	-0.0630191	0.224696	0.010472	-0.0553201	0.18995		0.499688	0.499255	0.499842
P31944	743.742	0	0	0	11147.1	0	0	0	0	0	0	0	0	0	0	0	0	0	0	0	NA	NA		-0.930793	NA	NA	NA	4.45055	NA	NA	NA	NA	NA	NA	NA	NA	NA	NA	NA	NA	NA	NA	NA	NA	NA		0.499688	NA	NA
P31946	234221	635113	469077	351720	681320	436105	678516	463932	368341	412894	525052	221439	159392	77884.4	94729.7	490046	494568	285050	144116	182597	1.27322e+06	1.13027e+06		-0.2047	0.619145	0.367253	-0.0641776	0.684578	0.394431	0.556203	0.370459	0.236216	-0.00414651	0.232512	-0.262797	-0.245811	-1.07332	-0.656051	0.0941925	0.122634	0.127795	-0.288844	-0.499917	0.45018	-0.0521353		0.499688	0.499255	0.499842
P31947	321.024	550.171	385.817	439.813	570.805	316.219	505.978	358.329	339.876	12632.4	643.768	284.025	200.927	162.784	231.623	366.259	458.996	221.577	223.583	329.092	NA	NA		-1.80959	0.271845	0.248371	-0.821565	-0.276412	-0.356391	-0.0562917	0.232437	-1.11593	4.97248	0.62541	-1.29507	-0.503081	0.784793	0.730316	-0.474051	-0.501366	-0.334757	0.812438	-0.729567	NA	NA		0.280103	0.499255	0.499842
P31948	164777	446754	346028	272819	495967	275787	395689	363585	227106	359791	581250	257778	111911	59600.7	53137.2	406928	467371	253706	87393.6	170694	1.59199e+07	1.2975e+07		-0.297941	0.423936	0.2849	-0.065003	0.606262	0.0690533	0.118907	0.346202	-0.0548666	0.195468	0.72211	0.355004	-0.41025	-1.18935	-1.18693	0.182353	0.412024	0.297647	-0.708072	-0.237928	1.09506	0.484956		0.499688	0.499255	0.499842
P32119	440784	892197	769245	755636	1.01341e+06	803483	984052	723144	781274	841526	855471	325184	256287	277254	413929	1.27336e+06	923682	488039	501865	360805	2.07745e+06	2.69112e+06		-0.210969	0.030599	0.0657559	0.045527	0.271042	0.248157	0.0700301	-0.0525912	0.403906	0.0673003	-0.126605	-0.70857	-0.587541	-0.361398	0.431192	0.474834	0.0278664	-0.157278	0.46257	-0.531881	0.106859	0.202057		0.499688	0.499255	0.499842
P32456	0	0	0	0	0	0	0	0	0	0	0	0	0	0	0	0	0	0	0	0	0	0		NA	NA	NA	NA	NA	NA	NA	NA	NA	NA	NA	NA	NA	NA	NA	NA	NA	NA	NA	NA	NA	NA		NA	NA	NA
P32969	459741	1.14682e+06	1.11724e+06	751513	1.25662e+06	757544	1.14515e+06	732900	831371	1.05235e+06	1.23145e+06	445388	252713	315149	259263	1.33847e+06	1.17526e+06	413493	370871	537031	3.09166e+06	3.82973e+06		-0.270115	0.25817	0.483738	-0.102351	0.45731	0.0202849	0.159858	-0.177843	0.378995	0.268882	0.2651	-0.383229	-0.748835	-0.3447	-0.424622	0.413402	0.256078	-0.559499	-0.137009	-0.0776199	0.181135	0.220817		0.499688	0.499255	0.499842
P33176	105309	284850	264852	209754	287397	242742	254066	202583	219971	267793	292513	186071	189695	90113.3	102675	258543	282248	167707	122088	159598	1.1874e+06	1.09471e+06		-0.752282	0.121359	0.176991	-0.164174	0.0486163	0.194475	-0.237914	-0.187387	0.0852056	-0.00125607	0.043715	0.118487	0.680893	-0.142214	0.149864	-0.184298	-0.0446786	0.0173427	0.148448	-0.0316412	0.268768	-0.181716		0.499688	0.499255	0.499842
P33240	3595.07	21511.1	31947.4	13449.2	30664.7	13430	28086.1	13518.2	32177.4	7727.86	52282.5	23533.2	6230.95	2339.89	344.712	29980.6	41332.1	13806.2	42242.6	11592.3	123345	263441		-1.58573	0.456079	0.875998	-0.260053	0.363674	-0.0257261	0.421996	0.000661354	0.928657	-0.278197	1.55045	0.987092	-0.194185	-0.717214	-3.58966	0.58218	1.06224	0.688969	3.12011	0.261979	0.173994	0.692358		0.356725	0.499255	0.378597
P33316	35831.2	46322.3	28967	119320	133375	45045.7	44504.4	116099	61631.6	69489.4	118217	18050.2	12779.1	7094.35	3862.61	135334	139255	31357.3	11739.3	100597	24636.2	44626		-0.0645543	-0.297135	-1.09736	1.14368	0.793414	-0.0904548	-0.704629	1.26007	0.121199	0.13471	0.897098	-1.23471	-1.04168	-0.00905865	-2.07583	1.00888	1.05948	0.00833927	-0.851574	1.64438	-1.50522	-1.17907		0.499688	0.499255	0.316393
P33991	165901	242272	203553	114412	210774	148180	294902	214126	164135	212852	381506	149467	98535.4	84474.6	53332.7	400522	444568	238828	116361	214189	210088	316654		0.0057293	0.0226689	-0.137628	-0.956579	-0.357474	-0.442786	0.0777468	-0.00813657	-0.345444	-0.264609	0.556337	-0.143891	-0.200064	-0.0411761	-0.679907	0.574664	0.731349	0.682568	0.203603	0.514822	-0.248889	0.0243175		0.499688	0.499255	0.499842
P33992	722273	880029	764619	876743	782328	756327	1.05287e+06	1.23193e+06	1.11289e+06	910365	1.10383e+06	962530	459192	469128	512251	1.1456e+06	1.19632e+06	740107	640880	654250	657331	839783		0.0944278	-0.418805	-0.372311	-0.162404	-0.543159	-0.270883	-0.258528	0.311018	0.500916	-0.244928	-0.17632	0.476881	-0.148977	-0.00753698	0.319454	-0.111589	-0.0165359	0.0333519	0.397441	-0.0755302	-0.607356	-0.532925		0.499688	0.499255	0.499842
P33993	845075	500208	648335	561516	629386	560221	756538	469863	708082	543400	689664	470179	394424	138106	140287	700107	625343	388698	263330	584201	1.07375e+06	1.57206e+06		1.09588	-0.446889	0.180272	-0.029811	-0.0779652	0.0846192	0.0444046	-0.311231	0.598438	-0.22969	-0.0623717	0.210416	0.425132	-0.978341	-0.781587	-0.0491578	-0.193474	-0.106568	-0.106097	0.553806	-0.539035	-0.27748		0.499688	0.499255	0.499842
P34897	363446	1.0058e+06	717108	1.13888e+06	995333	771590	851502	758810	663258	702637	1.4556e+06	487135	311272	200981	144199	1.33242e+06	1.55519e+06	946383	421967	345268	643748	1.38462e+06		-0.50967	0.213622	-0.0393568	0.655105	0.240507	0.18874	-0.147311	0.0236428	0.148363	-0.206981	0.670225	-0.106155	-0.297887	-0.819846	-1.12624	0.540396	0.798118	0.836513	0.212006	-0.598449	-1.16144	-0.318168		0.499688	0.499255	0.499842
P34931	0	0	0	0	0	0	0	0	0	0	0	0	0	0	0	0	0	0	0	0	0	0		NA	NA	NA	NA	NA	NA	NA	NA	NA	NA	NA	NA	NA	NA	NA	NA	NA	NA	NA	NA	NA	NA		NA	NA	NA
P34932	1.26336e+06	980814	951341	1.01773e+06	1.31612e+06	908752	1.91765e+06	982498	1.17441e+06	944705	1.51218e+06	1.08887e+06	534197	377244	571029	1.48277e+06	1.92243e+06	798640	541989	786051	2.05879e+06	2.23087e+06		0.750748	-0.468698	-0.245396	-0.143748	0.0375549	-0.200814	0.436998	-0.235498	0.414572	-0.37943	0.0730441	0.452768	-0.127532	-0.587771	0.247409	0.0766508	0.502011	-0.0814552	-0.068554	-0.00163413	0.218658	0.0656649		0.499688	0.499255	0.499842
P35080	7072.83	5654.24	8793.23	17542.9	10338.6	1251.21	19526.3	5378.95	17258.4	3462.58	0	3611.23	364.728	0	539.055	14325.3	0	0	1340.76	0	257906	330895		1.61882	0.691061	0.153214	1.30132	-0.0854548	-1.35248	1.06988	-0.151111	1.17326	-0.297661	NA	-0.628764	-2.21651	NA	-0.665301	0.663622	NA	NA	-0.770648	NA	0.460167	0.226348		0.422861	0.499255	0.499842
P35221	16530.4	101251	111661	108011	182040	150379	106717	102018	119008	93809.1	180597	253689	108462	22808.6	62937.3	180884	161982	80312.8	88899.9	95439.7	90404.5	99510.4		-2.5463	-0.420796	-0.289082	-0.263855	0.0998926	0.398779	-0.638745	-0.254624	-0.114154	-0.666893	0.274045	1.42809	0.806544	-0.848367	0.585052	0.215058	0.0622188	0.0376608	0.758042	0.2274	0.465966	0.144857		0.103501	0.499255	0.499842
P35222	NA	NA	NA	NA	NA	NA	NA	NA	NA	NA	NA	NA	NA	NA	NA	NA	NA	NA	NA	NA	2184.28	0		NA	NA	NA	NA	NA	NA	NA	NA	NA	NA	NA	NA	NA	NA	NA	NA	NA	NA	NA	NA	0.73862	NA		NA	NA	NA
P35232	514831	1.0912e+06	907097	1.84523e+06	876522	1.22386e+06	819036	606776	893420	836330	580095	606982	594085	346396	328413	908567	685501	387989	411840	577354	2.62296e+06	4.85528e+06		-0.174977	0.121951	0.107573	1.16956	-0.146419	0.669285	-0.405567	-0.52119	0.409914	-0.141877	-0.914354	0.0141538	0.458364	-0.251786	-0.127666	-0.230055	-0.615695	-0.710792	-0.0414863	-0.0358883	0.508478	1.14021		0.499688	0.499255	0.499842
P35241	NA	NA	NA	NA	NA	NA	NA	NA	NA	NA	NA	NA	NA	NA	NA	NA	NA	NA	NA	NA	99138.4	166218		NA	NA	NA	NA	NA	NA	NA	NA	NA	NA	NA	NA	NA	NA	NA	NA	NA	NA	NA	NA	-0.683461	-0.358468		NA	NA	NA
P35249	6634.9	0	15929.5	12568.5	10217.1	4572.36	3262.58	9619.67	6440.79	5311.15	10256	1535.38	3508.56	0	0	5564.97	12826	0	0	0	NA	NA		-0.047606	NA	0.787515	0.356538	-0.452747	0.263895	-0.918195	1.57488	0.335627	-0.00391279	0.0565642	-2.38245	-0.2879	NA	NA	-1.09389	0.118731	NA	NA	NA	NA	NA		0.499688	NA	0.428075
P35268	8.76779e+08	1927687863	8.92906e+08	1705758299	9.8725e+08	1242553499	1435049687	1202928719	7.52691e+08	1723638511	1.14117e+09	7.69745e+08	8.77562e+08	1.15932e+09	8.29424e+08	9.37833e+08	7.75041e+08	9.94751e+08	8.56815e+08	9.50096e+08	1.03025e+06	1.03165e+06		-0.143786	0.604185	-0.290968	0.601169	-0.150514	0.13154	-0.077225	-0.0310935	0.194316	0.65417	-0.33031	-0.370518	0.079789	0.211385	0.261767	-0.37545	-0.534037	-0.163995	0.199098	-0.0726922	-0.352375	-0.309984		0.499688	0.499255	0.499842
P35527	5.36266e+06	6.17692e+06	5.94139e+06	1.05846e+07	1.17386e+07	7.22486e+06	3.79802e+06	5.04946e+06	2.87203e+06	1.07261e+07	5.9975e+06	9.72283e+06	2.71283e+06	1.22666e+07	5.87092e+06	7.68348e+06	5.26146e+06	1.28133e+07	3.2352e+06	3.06871e+06	1.61465e+07	1.16481e+07		-0.0872946	-0.610038	-0.412975	0.374459	0.449793	-0.0540726	-1.50884	-0.715373	-0.892764	0.34884	-0.844444	0.647605	-0.787044	1.31177	0.632647	-0.354754	-0.841633	0.954035	-0.443797	-1.04332	0.259992	-0.337532		0.499688	0.499255	0.499842
P35579	6.93489e+07	6.14746e+07	8.61914e+07	7.25867e+08	7.0929e+07	1.31448e+08	1.5949e+08	7.15312e+07	3.35262e+08	7.80041e+07	8.0986e+07	4.44194e+07	1.10106e+08	7.1784e+07	7.1682e+07	5.89974e+07	6.4277e+07	7.64033e+07	5.04755e+07	8.896e+07	5.90138e+08	1.48758e+08		-0.296383	-0.924228	-0.170229	2.92842	-0.479473	0.39865	0.256925	-0.622824	2.58514	-0.358758	-0.673173	-1.00436	0.616823	-0.298191	0.244552	-0.907401	-0.657302	-0.370467	-0.395256	0.0166604	1.74703	-0.27033		0.499688	0.459435	0.499842
P35580	1.77991e+08	2.25438e+08	2.01981e+08	1.98467e+08	1.50731e+08	2.12225e+08	2.84387e+08	2.44558e+08	1.02318e+08	1.55869e+08	2.67719e+08	1.78018e+08	2.10192e+08	2.4022e+08	1.35391e+08	2.55818e+08	2.31395e+08	3.40348e+08	1.95728e+08	2.06373e+08	1226086327	1.05556e+09		-0.174253	-0.132964	-0.0532744	-0.148399	-0.451775	-0.0925097	-0.0542194	0.0131284	-0.297898	-0.444902	-0.0133956	-0.151653	0.282271	0.178549	-0.104018	0.206082	0.192252	0.62832	0.362294	0.0384221	0.443083	0.298867		0.499688	0.499255	0.499842
P35590	9.50723e+06	1.29766e+07	7.50693e+06	7.28606e+06	7.11797e+06	6.41321e+06	6.40532e+06	5.9103e+06	5.60547e+06	6.12868e+06	1.29497e+07	1.10042e+07	8.88544e+06	1.08818e+07	8.46538e+06	1.02266e+07	1.25131e+07	9.77793e+06	9.852e+06	1.01619e+07	NA	NA		0.41314	0.173374	-0.395097	-0.520335	-0.613821	-0.574464	-1.08284	-0.824913	-0.179582	-0.816353	-0.0342317	0.478646	0.610651	0.729598	0.817466	-0.257824	0.130671	0.180931	0.856981	0.37864	NA	NA		0.499688	0.499255	0.499842
P35606	613681	373342	390792	235701	401678	291254	508878	273420	397105	553555	477848	378242	377414	202028	228206	612927	527308	319609	244286	402261	396913	444939		0.929053	-0.433242	-0.189428	-0.939767	-0.394798	-0.483247	-0.151997	-0.690537	0.0337391	0.137417	-0.177881	0.235022	0.757334	0.0959712	0.38441	0.150346	-0.0622766	0.0248723	0.228196	0.395645	0.344714	0.185875		0.499688	0.499255	0.499842
P35609	NA	NA	NA	NA	NA	NA	NA	NA	NA	NA	NA	NA	NA	NA	NA	NA	NA	NA	NA	NA	94028.5	320517		NA	NA	NA	NA	NA	NA	NA	NA	NA	NA	NA	NA	NA	NA	NA	NA	NA	NA	NA	NA	-0.730398	0.727435		NA	NA	NA
P35610	0	0	2997.1	3856.35	0	3178.56	1784.87	1810.65	0	840006	1116.28	0	842.524	0	0	0	0	0	0	4221.2	NA	NA		NA	NA	-0.429315	-1.26631	NA	-0.0177481	-1.62133	-0.719867	NA	7.22478	-2.05739	NA	-1.2021	NA	NA	NA	NA	NA	NA	0.76742	NA	NA		NA	NA	0.499842
P35613	2.45411e+06	963726	932837	1.69001e+06	1.09295e+06	656201	1.03865e+06	796973	576602	766643	1.10649e+06	772657	975537	235549	238194	958904	1.02554e+06	604934	253065	743922	700095	1.61466e+06		2.07344	-0.13965	0.0730748	0.96247	0.106013	-0.334383	-0.128183	-0.192261	-0.316303	-0.347007	-0.0306882	0.296667	1.1199	-0.904337	-0.683272	-0.225874	-0.0920047	-0.127507	-0.842972	0.265084	-1.34168	-0.381991		0.329529	0.499255	0.499842
P35637	182629	385686	375853	245474	519548	244700	386905	277230	328200	257048	382271	256978	115540	127681	139147	347975	372689	169914	140543	184822	1.5739e+06	1.64135e+06		-0.250851	0.221454	0.370268	-0.264806	0.609536	-0.128311	0.0557082	-0.0568779	0.382036	-0.382104	0.100893	0.284275	-0.388816	0.0133847	0.257746	-0.0784435	0.0368018	-0.303189	0.0155947	-0.146365	0.50608	0.241214		0.499688	0.499255	0.499842
P35638	NA	NA	NA	NA	NA	NA	NA	NA	NA	NA	NA	NA	NA	NA	NA	NA	NA	NA	NA	NA	0	0		NA	NA	NA	NA	NA	NA	NA	NA	NA	NA	NA	NA	NA	NA	NA	NA	NA	NA	NA	NA	NA	NA		NA	NA	NA
P35659	36928.7	69970.5	76942.9	43704.9	90042	25615	47747.5	36025.5	41986.2	59581.1	45633.1	32114.8	34150.1	12681.9	14036.1	18633.7	30917.8	37691.3	11271.8	9869.87	62970.8	185500		0.477024	0.814573	0.856933	0.148038	0.710548	-0.432392	-0.0996847	0.0163974	0.0508712	0.405627	-0.0199549	0.122019	0.917662	0.315648	0.335826	-1.44075	-0.678825	0.778691	-0.417824	-1.31152	-1.34166	-0.28969		0.499688	0.497436	0.389549
P35749	0	0	0	0	0	0	0	0	0	0	0	0	0	0	0	0	0	0	0	0	0	0		NA	NA	NA	NA	NA	NA	NA	NA	NA	NA	NA	NA	NA	NA	NA	NA	NA	NA	NA	NA	NA	NA		NA	NA	NA
P35813	496902	691691	635270	566266	492633	449627	714723	648078	671993	779064	965717	905040	501559	437471	422396	872564	834280	558480	517723	489690	1.14918e+06	1.51927e+06		-0.0747989	-0.372805	-0.249412	-0.414258	-0.835829	-0.644392	-0.437667	-0.240479	0.137409	-0.0834586	0.0304058	0.785724	0.382165	0.308799	0.443674	-0.119227	-0.158456	0.0225634	0.487017	-0.108315	-0.20291	-0.0841076		0.499688	0.499255	0.499842
P35908	2.7086e+06	5.49714e+06	2.90003e+06	8.39576e+06	1.63851e+07	2.56956e+06	2.43134e+06	4.62584e+06	2.79973e+06	1.20367e+07	1.79887e+06	2.37888e+06	819879	4.08292e+06	2.22773e+06	4.09013e+06	2.93702e+06	8.03179e+06	816752	1.12585e+07	6.6515e+06	3.24252e+06		-0.229806	0.0237846	-0.663648	0.862984	1.74187	-0.76033	-1.33351	-0.0229495	-0.187527	1.33281	-1.804	-0.568901	-1.66918	0.629704	0.0748277	-0.477505	-0.903418	1.14469	-1.61391	1.77552	-0.1653	-1.40749		0.499688	0.499255	0.499842
P35998	1.80914e+06	2.17395e+06	1.61533e+06	2.30657e+06	1.36191e+06	1.64786e+06	2.0067e+06	1.73994e+06	1.11589e+06	1.80624e+06	1.9429e+06	1.88748e+06	1.58988e+06	1.56965e+06	1.3751e+06	1.66261e+06	1.6752e+06	1.65695e+06	1.24983e+06	1.28792e+06	5.22326e+06	5.63181e+06		0.465235	-0.121384	-0.286008	0.219259	-0.731107	-0.155683	-0.339009	-0.226775	-0.407927	-0.24141	-0.419708	0.403865	0.638843	0.591411	0.665634	-0.575826	-0.511324	0.110234	0.315148	-0.125931	0.337729	0.216582		0.499688	0.499255	0.499842
P36507	NA	NA	NA	NA	NA	NA	NA	NA	NA	NA	NA	NA	NA	NA	NA	NA	NA	NA	NA	NA	9.15015e+06	9.07662e+06		NA	NA	NA	NA	NA	NA	NA	NA	NA	NA	NA	NA	NA	NA	NA	NA	NA	NA	NA	NA	0.408303	0.18356		NA	NA	NA
P36542	421912	350674	477286	400522	410864	372015	520337	464556	430165	411285	363961	264877	157245	118146	121361	379675	453632	212525	192994	256175	145715	489070		0.617435	-0.271982	0.356297	0.0992163	-0.114876	0.131067	0.130571	0.348604	0.393117	-0.0582782	-0.331174	-0.0502609	-0.295995	-0.444629	-0.302342	-0.311671	-0.0367295	-0.33069	0.129528	-0.0260234	-1.471	0.00109658		0.499688	0.499255	0.499842
P36551	NA	NA	NA	NA	NA	NA	NA	NA	NA	NA	NA	NA	NA	NA	NA	NA	NA	NA	NA	NA	16714.8	6341.87		NA	NA	NA	NA	NA	NA	NA	NA	NA	NA	NA	NA	NA	NA	NA	NA	NA	NA	NA	NA	1.5542	-0.624567		NA	NA	NA
P36578	380969	1.12028e+06	834233	771080	1.00183e+06	901636	1.31636e+06	955473	518052	1.3975e+06	1.35272e+06	543581	320198	566606	382223	1.6782e+06	1.13543e+06	582419	450980	541989	3.57609e+06	4.43461e+06		-0.726545	0.0389662	-0.132393	-0.247244	-0.0603952	0.0965817	0.185772	0.0327318	-0.498609	0.510915	0.218252	-0.270898	-0.579711	0.332916	-0.037146	0.569017	0.0257901	-0.238823	-0.0316189	-0.245874	0.497044	0.54257		0.499688	0.499255	0.499842
P36776	NA	NA	NA	NA	NA	NA	NA	NA	NA	NA	NA	NA	NA	NA	NA	NA	NA	NA	NA	NA	75117.8	111585		NA	NA	NA	NA	NA	NA	NA	NA	NA	NA	NA	NA	NA	NA	NA	NA	NA	NA	NA	NA	0.108157	0.124567		NA	NA	NA
P36871	76344.5	11633.1	30394.9	17813.5	22902	16434.8	22582.4	21811.3	215570	25931.8	41966.9	13068.5	9744.34	11897.8	5113.38	53488.9	72979.3	18996.5	9927.19	17089.9	2829.76	5648.04		1.92582	-1.37794	-0.0937304	-0.850936	-1.02293	-0.659686	-0.82647	-0.119514	2.77707	-0.456539	0.333434	-0.856546	-0.496485	0.82152	-0.401205	0.513125	0.949536	0.199158	0.172155	-0.171983	-0.378655	0.0502664		0.361674	0.313348	0.499842
P36873	0	0	0	0	0	0	0	0	0	0	0	0	0	0	0	0	0	0	0	0	296197	258969		NA	NA	NA	NA	NA	NA	NA	NA	NA	NA	NA	NA	NA	NA	NA	NA	NA	NA	NA	NA	0.293576	-0.328477		NA	NA	NA
P36915	NA	NA	NA	NA	NA	NA	NA	NA	NA	NA	NA	NA	NA	NA	NA	NA	NA	NA	NA	NA	0	729.989		NA	NA	NA	NA	NA	NA	NA	NA	NA	NA	NA	NA	NA	NA	NA	NA	NA	NA	NA	NA	NA	-2.05591		NA	NA	NA
P36954	21870.4	29286	39783.5	22069.2	60333.7	29403.6	51660.5	40468.9	6455.47	36599.2	18373.8	55416.4	8466.03	12291.6	40671.4	69059.6	130914	35478.8	53488.3	43692.8	NA	NA		-0.0379485	-0.230954	0.0701025	-0.650563	0.278271	0.0128732	0.213682	0.466469	-2.59766	-0.117042	-1.16154	1.1523	-0.899473	0.616032	2.33002	0.718909	1.67745	0.969753	2.28281	1.14138	NA	NA		0.499688	0.499255	0.499842
P36957	7600.55	37871.1	17933.6	32683.8	45906.1	23542.7	27606.9	15793.2	10761.5	20475.4	29581.6	11617.2	3680.39	2761.42	1125.6	27618.7	41250.1	5060.32	3824.34	8700.26	28080	41689		-0.522438	1.32163	0.0561423	1.02246	0.957269	0.820026	0.413856	0.319215	-0.723024	0.141786	0.744037	-0.0711562	-0.980207	-0.417557	-1.72891	0.469389	1.05712	-0.807119	-0.329188	-0.204955	0.0418845	0.0289799		0.499688	0.339435	0.499842
P37108	166947	416472	300987	257605	293401	255511	314537	328431	279960	354312	321816	153957	123500	82376.2	92010.5	333886	300370	136727	95436.3	153440	52047.4	158400		-0.186384	0.629758	0.237586	0.0488314	-0.0759463	0.163355	-0.0302997	0.42525	0.234673	0.289389	0.102019	-0.306305	-0.0667629	-0.265196	-0.0614904	0.101882	-0.0538361	-0.340831	-0.287418	-0.181536	-1.56117	-0.246834		0.499688	0.499255	0.499842
P37198	3150.08	0	16271.3	4677.53	21794.6	2100.42	20401.1	12501.9	10506	10734.1	50121.6	17465.6	7977.94	1056.44	2475.26	23684.9	30148.1	10871.4	2006.06	6678.25	NA	NA		-0.663698	NA	0.11532	-0.68612	0.0356052	-1.5761	0.162403	0.197893	-0.594918	-0.641759	1.76494	0.718058	0.349583	-0.611157	-0.337584	0.446153	0.782271	0.517876	-0.0297068	-0.442522	NA	NA		0.499688	NA	0.499842
P37268	442781	23127.7	36340.3	163304	26597.8	30029.5	79009.8	35003.7	59339.2	70758.3	36574.9	22939.1	33950.3	21980.9	20210.4	89015.9	35133.7	30161.9	25483.5	46636.1	17899.7	37103.1		3.62833	-1.39541	-0.880892	1.52525	-1.75625	-0.771496	0.0270076	-0.573683	-0.0735577	0.050489	-0.938157	-0.986677	0.366244	0.647478	0.438459	0.270262	-1.11602	-0.101781	0.330068	0.409789	0.269916	0.747742		0.0529076	0.307323	0.412996
P37802	342139	754881	652689	577877	841584	414799	604160	598172	594959	465165	895188	261006	215724	122957	141056	843536	841517	495555	194328	271760	608672	690204		-0.121974	0.355856	0.357146	0.173236	0.505784	-0.18853	-0.122459	0.234434	0.472368	-0.316335	0.510971	-0.508737	-0.301945	-0.929441	-0.581104	0.395829	0.409852	0.438433	-0.362934	-0.414472	-0.385627	-0.518222		0.499688	0.499255	0.499842
P37837	12873.6	23850.6	25411	34570.3	61598.5	63318.2	70646.6	43103.2	24371.4	43539.9	39124.8	4674.11	4399.52	865.867	4763.75	26408.5	43196	7871.59	6498.15	4935.68	4601.81	23791.5		-0.307117	0.0364723	-0.0283866	0.529683	0.802491	1.69816	1.21442	1.19554	-0.0909696	0.673424	0.555027	-2.01088	-1.29797	-2.7493	-0.198661	-0.193578	0.537747	-0.734903	-0.16255	-1.62393	-1.93488	-0.0939902		0.499688	0.499255	0.499842
P37840	75819.8	265729	87122.6	157116	73570.5	120610	204798	265141	225212	298440	94801.3	207354	95532.9	108317	39839.3	263638	230850	146152	91835.4	101759	107887	144583		-0.704925	0.614334	-1.00008	-0.0598423	-1.54946	-0.321665	-0.0401165	0.750452	0.497421	0.670533	-1.07118	0.75522	0.197607	0.889678	-0.600794	0.392096	0.200829	0.454561	0.341224	-0.128842	-0.401459	-0.347293		0.499688	0.499255	0.362513
P38117	NA	NA	NA	NA	NA	NA	NA	NA	NA	NA	NA	NA	NA	NA	NA	NA	NA	NA	NA	NA	16021	36284.2		NA	NA	NA	NA	NA	NA	NA	NA	NA	NA	NA	NA	NA	NA	NA	NA	NA	NA	NA	NA	-0.862786	-0.189133		NA	NA	NA
P38159	82392.9	191047	156854	125848	162923	102145	122767	128774	123773	149767	206819	148791	83336.4	87854.5	124344	186692	141491	88564.5	68091.9	90897.7	776920	642920		-0.453063	0.253861	0.0530944	-0.232742	-0.165347	-0.416168	-0.645572	-0.183398	-0.193262	-0.207258	0.228151	0.427872	0.132202	0.611639	1.16892	0.0210685	-0.389757	-0.204443	-0.00686683	-0.176826	0.600796	-0.021574		0.499688	0.499255	0.499842
P38435	0	0	0	0	0	0	0	0	0	0	0	0	0	0	0	0	0	0	0	0	0	0		NA	NA	NA	NA	NA	NA	NA	NA	NA	NA	NA	NA	NA	NA	NA	NA	NA	NA	NA	NA	NA	NA		NA	NA	NA
P38606	187471	120468	95935.1	291048	159241	90106.1	161838	83859.6	251037	119795	190789	248428	77868.3	33284.6	55786.9	100167	98458.3	71397.8	52785.6	61246.6	160019	251771		0.898162	-0.305425	-0.596884	1.11655	-0.139017	-0.497274	-0.131743	-0.70505	0.919705	-0.429576	0.227111	1.28315	0.150269	-0.615629	0.153187	-0.789894	-0.809591	-0.357517	-0.22817	-0.628437	-0.504846	-0.208252		0.499688	0.499255	0.499842
P38646	8.65682e+06	5.16405e+06	4.8327e+06	8.63308e+06	5.64771e+06	4.85719e+06	7.09697e+06	4.69218e+06	4.63808e+06	4.89255e+06	6.84276e+06	6.05054e+06	2.40306e+06	2.00566e+06	1.46534e+06	7.38278e+06	7.40329e+06	3.70449e+06	2.37656e+06	3.72267e+06	1.44939e+07	1.62949e+07		1.26608	-0.265807	-0.105814	0.692575	-0.0339745	-0.0232998	0.0455411	-0.206578	0.40103	-0.206734	-0.0267816	0.58445	-0.31452	-0.703176	-0.785744	0.200302	0.276445	-0.243941	-0.258304	-0.11017	-0.0573929	-0.0236619		0.499545	0.499255	0.499842
P38919	4927.81	41037.4	39802.9	13765.4	61710.8	29386.5	31878.7	21694.9	28676.7	22322.4	28151	9602.71	6961.79	4757.71	6610.1	27853.9	30039.1	9107.09	7082.69	9710.32	125435	98330.3		-1.53548	0.988545	0.775823	-0.637778	0.996954	0.717743	0.191106	0.258565	0.34869	-0.149572	0.199827	-0.765316	-0.457729	-0.0946386	0.342853	0.0560687	0.167684	-0.355349	-0.00501085	-0.412068	0.455384	-0.518361		0.365192	0.439469	0.433996
P39019	89865.8	439474	360552	251835	342308	330470	401707	297152	152599	458449	346901	106929	116739	169600	126934	387638	328486	243608	133773	234406	230276	676346		-1.25452	0.514421	0.372481	-0.15075	0.042007	0.393469	0.182706	0.122265	-0.736328	0.532833	0.0402902	-0.974022	-0.302929	0.553176	0.210233	0.159381	-0.0800113	0.316684	0.0276999	0.280528	-1.14059	0.132521		0.445209	0.499255	0.499842
P39023	1.48369e+06	1.28152e+06	1.27567e+06	1.15591e+06	1.75796e+06	1.12078e+06	1.65708e+06	1.21064e+06	1.23101e+06	2.05738e+06	1.69632e+06	1.57854e+06	739487	399141	398658	2.77085e+06	2.04508e+06	529384	502603	946869	2.45904e+06	3.46286e+06		0.772609	-0.306852	-0.0370947	-0.193515	0.243406	-0.122798	-0.0128255	-0.161399	0.292279	0.5529	-0.00457615	0.762211	0.118105	-0.788587	-0.548878	0.781519	0.375652	-0.954352	-0.424411	0.0385172	-0.442469	-0.186358		0.499688	0.499255	0.499842
P39656	1.11395e+06	771972	831778	1.38439e+06	795409	586117	1.47417e+06	628966	1.04356e+06	828193	1.02104e+06	876510	689149	349535	317696	1.30403e+06	1.18781e+06	568947	378975	847135	728328	2.14987e+06		0.824588	-0.517284	-0.154157	0.610073	-0.427655	-0.556248	0.334124	-0.592731	0.490415	-0.296254	-0.194791	0.431794	0.548752	-0.338158	-0.290069	0.173132	0.062887	-0.258723	-0.285813	0.401469	-0.345613	0.970459		0.499688	0.499255	0.499842
P39687	254529	748195	497304	470111	615660	396845	555188	477838	407857	525776	634288	343037	229221	208202	194208	389489	443600	339780	146619	268557	694359	1.03727e+06		-0.306367	0.592028	0.204725	0.118687	0.294263	-0.00324879	0.00337534	0.150326	0.166211	0.120028	0.24841	0.151543	0.03978	0.100826	0.144296	-0.502239	-0.290659	0.127404	-0.532773	-0.18069	-0.906882	-0.628346		0.499688	0.499255	0.499842
P39748	6943.54	4820.96	12895.7	7539.69	25260	4832.58	14020	36224.6	26073.5	5347.21	28575.6	2820.85	920.334	1000.41	1787.02	11851.1	50715	2358.01	1333.38	9027.35	468.985	6373.39		-0.608419	-0.454331	0.926734	0.016642	0.339928	-0.229606	-0.320827	1.90843	0.781013	-1.58823	1.02311	-0.960141	-1.82556	-0.606852	-0.73927	-0.495443	1.57962	-0.722577	-1.55353	-0.00605783	-3.18018	0.104876		0.499688	0.499255	0.356622
P40123	19576.1	20737.1	27752.7	7451.36	40699.5	28642.1	35618.5	60827.6	21692.6	25258.7	37319.2	23458.3	18638.7	27942.7	16043.7	39288.2	26076.5	18481.1	28666.5	11186	0	0		-0.138162	-0.684222	-0.40985	-2.22386	-0.256859	0.0382704	-0.284943	1.15139	-0.710368	-0.613331	-0.0273119	-0.0814677	0.359048	1.92375	1.0045	-0.0691465	-0.693461	0.0529881	1.41949	-0.851008	NA	NA		0.499688	0.499255	0.499842
P40222	37672.1	153729	135715	66200.9	179908	101716	128464	89805.7	90629.2	87938.3	115607	48980.6	51655.8	17908.5	25214.8	92963.6	162288	50164.7	33812.8	52856.2	185301	263967		-0.816385	0.713013	0.531445	-0.466244	0.625789	0.328735	0.158386	0.0606034	0.00966553	-0.244288	0.128366	-0.50075	0.206797	-0.755384	-0.299984	-0.255651	0.584062	-0.171904	-0.18902	-0.157557	-0.279896	-0.190203		0.499688	0.499255	0.499842
P40227	341100	1.23131e+06	754548	668956	996324	813386	1.1096e+06	1.06637e+06	548376	960879	1.36893e+06	446495	187555	197244	261858	1.12244e+06	1.39974e+06	353398	281962	465064	2.31843e+06	2.40424e+06		-0.518978	0.606736	0.126114	-0.047111	0.330452	0.357654	0.335895	0.62182	-0.0491819	0.346288	0.671223	-0.145618	-0.961376	-0.749931	-0.144311	0.37463	0.729585	-0.535944	-0.294681	-0.0654472	0.723558	0.478937		0.499688	0.499255	0.499842
P40429	51339.8	60407.1	59842.5	44858.8	70736.6	45544.3	62170.5	60617.1	56208.9	128961	78722.9	39049.9	15831.4	20450	19460.4	117854	69592.7	42357.8	26300.3	33192.1	414308	1.03804e+06		0.299233	-0.0268859	-0.0485357	-0.40464	-0.133479	-0.216537	-0.27722	0.130423	-0.0621998	0.971172	0.203077	-0.192277	-0.897345	0.130937	-0.0119902	0.742766	-0.0297683	0.240754	0.100817	-0.188019	-0.162326	0.74967		0.499688	0.499255	0.499842
P40616	0	8228.68	17988.5	32694.2	28387.7	10225.4	140740	27705	26794	56897	232.742	7798.11	203.916	0	2463.21	0	248.898	0	0	10260.7	0	7138.74		NA	0.505705	1.58162	1.36344	1.72138	0.010354	3.3022	1.67117	2.05009	2.10426	-5.006	0.737763	-3.93541	NA	0.937657	NA	-5.18477	NA	NA	0.369838	NA	-0.484151		NA	0.499255	0.0659754
P40763	30584.7	88096.4	90890.8	54307.3	107998	90965.7	87619.3	88859	82870.5	92578.2	67627.8	107253	61109.1	29954.2	51502	72033.5	85829.7	68074	67036.4	79539.1	7283.56	2290.18		-0.969366	-0.004976	-0.0653628	-0.698096	-0.192886	0.292012	-0.366854	0.200563	-0.108899	-0.106474	-0.60299	0.752907	0.626413	0.451304	1.12986	-0.600325	-0.331209	0.502138	1.08921	0.632918	0.285929	-0.973109		0.499688	0.499255	0.499842
P40925	109400	267633	198261	173331	440614	239518	310084	268272	178799	355084	350191	98241.7	27683.9	27193.4	72742.3	392200	362731	103220	55778.9	59852.8	43497.4	72029.7		-0.271798	0.514018	0.116273	-0.0217248	1.00922	0.589568	0.468236	0.656829	0.0484649	0.819159	0.762775	-0.464337	-1.75668	-1.28798	0.177798	0.872959	0.762419	-0.179017	-0.515625	-1.03157	-1.64511	-1.27056		0.499688	0.499255	0.499842
P40926	417613	1.01064e+06	731366	799596	1.07834e+06	683924	816715	752847	693348	961156	1.10724e+06	322307	141775	130978	206338	1.34202e+06	1.43841e+06	446504	201225	286086	200684	1.46248e+06		-0.101548	0.450608	0.210732	0.347256	0.574309	0.232616	0.00945222	0.241267	0.418403	0.470001	0.493103	-0.500204	-1.24598	-1.20614	-0.356462	0.770116	0.897033	-0.0491638	-0.655178	-0.657227	-2.69522	-0.0458442		0.499688	0.499255	0.499842
P40939	60908	38919.9	42926.5	47462.8	34189.6	35324.9	34764.4	35622.1	33120.2	58291.1	37642	50222.1	18593	14330.3	11788.5	65581	129594	9503.87	16717.6	44605.6	342064	165525		1.03756	-0.239527	-0.187896	0.0901487	-0.905353	-0.136072	-0.749441	-0.183061	-0.478862	0.194529	-0.485758	0.608279	-0.170389	0.304662	-0.116219	0.25386	1.27653	-1.45572	-0.0195248	0.751225	1.43935	-0.191849		0.499688	0.499255	0.499842
P41091	193154	501230	368199	272927	525038	333619	507417	380125	292078	434076	482887	201589	124402	133143	122671	707571	542733	191404	177861	201725	727963	754625		-0.43424	0.336392	0.0697464	-0.37779	0.357159	0.0611897	0.188188	0.14031	-0.0548614	0.12978	0.175447	-0.343762	-0.549956	-0.201979	-0.203467	0.705769	0.325071	-0.398435	0.0923225	-0.287282	-0.234698	-0.507718		0.499688	0.499255	0.499842
P41219	0	0	0	0	0	0	0	0	0	0	0	0	0	0	0	0	0	0	0	0	0	0		NA	NA	NA	NA	NA	NA	NA	NA	NA	NA	NA	NA	NA	NA	NA	NA	NA	NA	NA	NA	NA	NA		NA	NA	NA
P41227	21480	44764.6	48155	35888.8	56798.4	33371.6	69755.8	40292.2	28412.3	34874.7	56021.9	38170.9	51207.8	14484.9	18370.3	52948.4	65945.4	33860.6	25855.6	41131.7	67326.6	38661.7		-0.496583	-0.0343165	-0.07139	-0.343745	-0.227532	-0.230491	0.234083	0.00844966	-0.771104	-0.612688	0.0793931	0.160532	1.35282	0.39788	0.649252	-0.112151	0.212281	0.449548	0.705793	0.611011	0.824707	-0.59683		0.499688	0.499255	0.499842
P41240	26341.4	21420.8	36233	19177.6	22172.9	6935.8	12076.7	18007.6	9097.1	5401.16	15464.6	1164.2	1557.87	0	4980.16	14373	10425.9	2403.33	0	1325.07	1981.91	22125.8		1.8713	1.17518	1.85778	0.840756	0.586204	0.744921	-0.104768	1.29401	-0.327358	-1.14317	0.535259	-2.85386	-0.590491	NA	2.25991	0.222947	-0.327047	-1.27707	NA	-1.36767	-1.6511	0.315327		0.365192	0.406296	0.0235184
P41250	91690.8	130563	220721	193773	222318	165016	215613	104877	209913	351794	175837	62359.9	87229.7	97428.8	45875.2	383553	484717	328600	82496.4	207362	61677.7	115931		-0.614708	-0.641661	0.167186	0.0397817	-0.130578	-0.0593045	-0.170965	-0.826538	0.173555	0.712821	-0.353835	-1.24153	-0.133346	0.579616	-0.563391	0.747659	1.10447	1.48238	0.000188203	0.743237	-0.190453	0.344852		0.499688	0.499255	0.499842
P41252	267437	380147	361846	646964	447604	464124	655429	468383	386675	368138	425086	173403	251789	146742	157629	447353	492433	244648	164362	320398	1.01644e+06	1.48571e+06		-0.108524	-0.262836	-0.128319	0.732397	-0.046381	0.374345	0.392913	0.26978	0.210159	-0.279281	-0.197546	-0.730578	0.322559	-0.255611	-0.015132	-0.153579	0.00536658	-0.213846	-0.210323	0.225067	-0.0385963	0.203013		0.499688	0.499255	0.499842
P42166	535503	888589	781091	830002	800049	733809	815450	595055	935624	716573	844406	671556	904631	453187	418840	763569	714998	638629	564728	753319	558491	572189		-0.126899	-0.124115	-0.0788175	0.0140797	-0.260017	-0.0490791	-0.380669	-0.492465	0.470491	-0.358583	-0.294165	0.203605	1.12433	0.264058	0.314841	-0.45662	-0.532324	0.0994157	0.498152	0.396029	-0.0108991	-0.28384		0.499688	0.499255	0.499842
P42167	1.77157e+06	2.1238e+06	2.37479e+06	2.47997e+06	1.93902e+06	1.91179e+06	2.21528e+06	1.89923e+06	2.69993e+06	2.14132e+06	2.58566e+06	2.11626e+06	2.9093e+06	1.46043e+06	1.28938e+06	2.37623e+06	1.75214e+06	1.72802e+06	1.43884e+06	2.27792e+06	6.04015e+06	5.8656e+06		0.146129	-0.433266	0.00683992	0.0369032	-0.480644	-0.219505	-0.481382	-0.377872	0.656903	-0.268636	-0.282309	0.275652	1.24111	0.168873	0.275018	-0.322458	-0.717995	-0.126277	0.233865	0.422528	0.069079	-0.193285		0.499688	0.499255	0.499842
P42224	NA	NA	NA	NA	NA	NA	NA	NA	NA	NA	NA	NA	NA	NA	NA	NA	NA	NA	NA	NA	0	0		NA	NA	NA	NA	NA	NA	NA	NA	NA	NA	NA	NA	NA	NA	NA	NA	NA	NA	NA	NA	NA	NA		NA	NA	NA
P42285	83084.1	141655	133311	366481	174700	207756	147530	176365	191527	97317.6	198711	208474	66811.7	80168.6	97417.4	301924	283448	118161	86121.8	112993	1315.18	9618.87		-0.581306	-0.393031	-0.567582	1.05727	-0.540403	0.423052	-0.667076	0.118346	0.0655406	-1.11296	-0.0819737	0.654315	-0.347775	0.766455	0.926807	0.458429	0.37493	0.21105	0.329575	0.0569613	-1.35145	0.0352538		0.499688	0.499255	0.499842
P42356	218645	27308.1	36997.2	29105	33259.4	51339.4	53718.3	28507.8	36316.2	58725.4	60188.5	40215.3	50928.1	22928.3	14194.1	69857.9	78969.8	33786.5	18584.1	79878	113655	211090		2.65313	-1.04798	-0.681814	-0.917322	-1.21586	0.137707	-0.376834	-0.798351	-0.615186	-0.0709168	-0.0652058	-9.09e-05	1.04324	0.701543	-0.1416	0.0739003	0.266654	0.143594	-0.155743	1.33562	0.166977	0.544559		0.190863	0.43458	0.499842
P42677	315157	159717	230428	102212	163756	114766	221562	100106	177944	249976	135847	209029	85946.5	51244.7	38317.7	136124	145483	72527.9	72270	245662	3.61762e+06	3.08939e+06		1.43267	-0.188864	0.523157	-0.681492	-0.234151	-0.36751	0.111144	-0.683702	0.326372	0.450279	-0.54557	0.846133	0.0559211	-0.432755	-0.765226	-0.586449	-0.47789	-0.678204	-0.0799055	1.16258	0.548264	-0.0160703		0.472769	0.499255	0.499842
P42695	60753	18669.4	17173.9	35711.7	25931.2	7494.69	30913.1	9905.24	63574.5	30525.8	15210.5	18588.2	117554	3016.19	2993.27	24882.4	43545.3	24534.4	7689.88	75246.4	339414	1.17112e+06		1.78677	-0.592425	-0.839238	0.400367	-0.615408	-1.70349	-0.209033	-1.3414	1.20146	-0.0477476	-1.10628	-0.14765	3.32444	-1.22049	-1.35491	-0.472058	0.364145	0.708945	-0.393759	2.26504	0.6471	1.91409		0.377677	0.499255	0.433996
P42704	1.69961e+07	1.40211e+07	1.42551e+07	1.01974e+07	1.14806e+07	1.09235e+07	9.85323e+06	1.47202e+07	1.22955e+07	9.51014e+06	1.20168e+07	1.19594e+07	1.13056e+07	1.13216e+07	1.15412e+07	8.0843e+06	8.34597e+06	1.05237e+07	1.12741e+07	8.92481e+06	1.30104e+07	8.90937e+06		0.832596	-0.161229	0.116112	-0.459024	-0.347324	-0.218669	-0.871835	0.0992543	0.528705	-0.60109	-0.589544	0.157837	0.528063	0.359632	0.835064	-1.05234	-0.924275	-0.144536	0.611958	-0.255773	0.60059	-0.0490125		0.499688	0.499255	0.499842
P42765	7301.93	72722.6	73938.2	56718.3	90685.2	50116.6	54065.7	58139.7	56726	67887.4	74909.7	19781.5	27212.8	6326.49	12434.6	66791.7	59213.7	14840.2	12997.8	13096.2	NA	NA		-2.05117	0.787591	0.679825	0.432838	0.586837	0.47351	-0.0394806	0.649859	0.369392	0.487235	0.617523	-0.72876	0.499287	-0.765801	0.129374	0.342162	0.160229	-0.700654	-0.256522	-1.01058	NA	NA		0.21625	0.499255	0.485331
P42766	13565.7	48499.8	10227.7	11937.4	75334.6	8907.73	41155.4	14871.1	19964.5	205440	98484.3	38422.7	7986.41	5320.56	10239.5	124369	69531.2	76013.5	6907.49	30928.9	472984	865391		-0.842292	0.446995	-1.95436	-1.60286	0.64087	-1.82776	-0.132807	-1.12608	-0.864976	2.43259	1.3078	0.572473	-1.07266	-0.831169	0.0131555	1.57239	0.717628	1.99045	-0.987653	0.564449	0.818041	1.17323		0.499688	0.499255	0.0368052
P42771	NA	NA	NA	NA	NA	NA	NA	NA	NA	NA	NA	NA	NA	NA	NA	NA	NA	NA	NA	NA	0	0		NA	NA	NA	NA	NA	NA	NA	NA	NA	NA	NA	NA	NA	NA	NA	NA	NA	NA	NA	NA	NA	NA		NA	NA	NA
P43034	NA	NA	NA	NA	NA	NA	NA	NA	NA	NA	NA	NA	NA	NA	NA	NA	NA	NA	NA	NA	13890.6	17876.6		NA	NA	NA	NA	NA	NA	NA	NA	NA	NA	NA	NA	NA	NA	NA	NA	NA	NA	NA	NA	-0.213372	-0.441881		NA	NA	NA
P43243	110672	274933	369914	342705	453397	250845	540006	361971	260240	347137	606942	480429	169316	183339	124651	600258	585626	193062	173962	253635	1.14874e+07	9.72115e+06		-1.22774	-0.600295	0.0696153	-0.0443173	0.149486	-0.382995	0.266475	0.0358727	-0.185796	-0.185213	0.481954	0.961996	-0.107222	0.199356	-0.217971	0.445692	0.428904	-0.413515	0.0177864	0.0380653	2.1209	1.55794		0.451332	0.499255	0.499842
P43246	25023.8	40866.9	65755.5	41158.1	103326	66575.5	128962	101176	44361	74631.9	158423	84276.5	76846.3	60842.6	79383.7	138303	183162	100759	44188.1	95160.8	58795.4	108140		-1.47031	-1.3165	-0.633461	-1.25134	-0.306748	-0.358025	0.0917605	0.192322	-1.13737	-0.556984	0.529648	0.240942	0.753746	1.10135	1.40821	0.264518	0.694181	0.841909	0.185403	0.68774	-0.839421	-0.411815		0.376379	0.334488	0.499842
P43307	352876	222662	220989	693000	278945	141569	282183	213704	756616	182874	264128	1.67449e+06	367699	93895.8	72500	266386	266306	145858	58252.9	266255	631795	1.58539e+06		0.695709	-0.600793	-0.444466	1.26039	-0.346845	-0.960883	-0.434601	-0.461091	1.57543	-0.919911	-0.462195	3.0369	1.31296	-0.438451	-0.722503	-0.49329	-0.483953	-0.544678	-1.30657	0.376728	0.00134681	1.04066		0.499688	0.499255	0.499842
P43487	576959	1.68368e+06	1.09842e+06	1.20996e+06	1.48722e+06	1.30208e+06	2.0917e+06	1.64174e+06	1.00218e+06	1.46744e+06	1.96702e+06	899813	770736	713036	414776	1.49278e+06	1.7757e+06	1.30489e+06	526386	831906	6.95056e+06	6.28057e+06		-0.609236	0.121413	-0.23602	-0.111351	0.0212382	0.119941	0.350979	0.311751	0.0385931	0.07342	0.227802	-0.0648966	0.192841	0.0613378	-0.484942	-0.113443	0.195344	0.389971	-0.341986	-0.14315	-0.0336237	-0.424557		0.499688	0.499255	0.499842
P43490	250016	626973	757251	322580	888063	540544	871579	697818	340045	679578	833562	842082	217295	249930	204143	1.39387e+06	1.04744e+06	621027	230825	481217	1.131e+06	1.10221e+06		-0.826691	-0.204504	0.311715	-0.955898	0.330759	-0.0666801	0.154967	0.182727	-0.601277	-0.00256963	0.124699	0.97632	-0.560756	-0.180255	-0.315555	0.875383	0.471749	0.495855	-0.39404	0.166111	0.145045	-0.203551		0.499688	0.499255	0.499842
P43686	1.25504e+06	636700	548779	744131	586296	465451	674147	608998	1.13889e+06	607146	422235	364707	189182	119331	222735	1.02339e+06	1.04886e+06	396413	324635	417857	4.96215e+06	6.06301e+06		1.60216	-0.196896	-0.168228	0.291022	-0.278065	-0.293951	-0.22574	-0.0338729	1.22081	-0.155681	-0.901274	-0.267532	-0.769471	-1.32427	-0.209079	0.416878	0.480853	-0.188131	0.0918626	-0.0453859	1.30382	1.30513		0.427492	0.499255	0.499842
P45880	840788	708923	684801	4.22724e+06	712078	508239	953436	528660	759598	527122	618978	366317	1.37277e+06	483163	326720	764357	686985	599515	364855	924061	3.55782e+06	6.04036e+06		0.503653	-0.591503	-0.374881	2.33487	-0.516887	-0.705509	-0.24296	-0.797405	0.124274	-0.888119	-0.895237	-0.807783	1.63664	0.142899	-0.2219	-0.549696	-0.669857	-0.146906	-0.296924	0.598835	0.274316	0.788498		0.499688	0.499255	0.499842
P45974	8262.32	14476.6	43725.3	39565.7	85775.6	30869.7	24867	14306.3	26372	30684	41878.7	5922.44	1061.32	244.614	0	57220.6	45711.8	7049.61	579.121	6100.84	657.237	23017.5		-0.406838	-0.080932	1.42026	1.3124	1.91673	1.25168	0.289257	0.223091	0.625984	0.767392	1.30256	-1.06082	-2.82414	-2.95914	NA	1.58695	1.2282	-0.302771	-3.0892	-0.73044	-4.83705	-0.140695		0.499688	0.499255	0.109151
P46020	5319.64	0	1070.31	0	3120.88	0	3896.47	0	2248.82	2497.94	3387.71	4356.73	6850.73	0	0	33112	27831.6	14240.3	3539.85	39257.6	NA	NA		0.493126	NA	-2.52901	NA	-1.43456	NA	-0.865755	NA	-1.48886	-1.38584	-1.87502	-0.986176	1.59109	NA	NA	1.41632	1.09081	1.34571	1.30985	2.66132	NA	NA		0.499688	NA	0.00364278
P46060	157875	146997	245799	159025	301248	154884	219349	190747	204463	171626	184832	98780.6	78700.7	25727.8	28637.7	242727	165824	80888.4	94416.5	87675.5	773860	1.09203e+06		0.415236	-0.242983	0.630769	0.0155295	0.665919	0.106934	0.121951	0.303396	0.478209	-0.0997463	-0.0414625	-0.272476	-0.0507778	-1.34427	-1.13212	0.311683	-0.253465	-0.453664	0.369752	-0.333337	0.242622	0.420844		0.499688	0.499255	0.499842
P46063	NA	NA	NA	NA	NA	NA	NA	NA	NA	NA	NA	NA	NA	NA	NA	NA	NA	NA	NA	NA	575.763	320.899		NA	NA	NA	NA	NA	NA	NA	NA	NA	NA	NA	NA	NA	NA	NA	NA	NA	NA	NA	NA	-2.35575	-2.75589		NA	NA	NA
P46087	13143.2	46889.1	55779	57375.5	54986.8	39359.8	59605.5	65606.4	74974.1	68621.2	70879.7	132196	23877.2	15997.6	24868.6	52870.6	51164.7	4831.61	70728.5	21682.3	286913	301017		-1.47129	-0.17788	0.00926935	0.161258	-0.382522	-0.194498	-0.14707	0.503027	0.540794	0.233569	0.249295	1.83969	-0.0248899	0.193483	0.725554	-0.263591	-0.301046	-2.69554	1.87934	-0.543712	0.941118	0.481578		0.376379	0.499255	0.499842
P46109	99710.8	71034.3	93762	72379.8	121752	32062.2	27437.5	54481.3	94859.8	55375.8	76137	55826.4	16368.9	4114.78	6693.45	44601.4	34697.2	19042.9	13416.1	14105.9	108693	171070		1.72658	0.62143	0.959926	0.687513	0.976893	-0.317557	-1.12213	0.409019	1.06943	0.094261	0.535747	0.737733	-0.403643	-1.636	-1.03818	-0.337914	-0.700382	-0.470722	-0.40827	-1.00075	-0.814072	-0.673199		0.396104	0.499255	0.33835
P46379	1.98125e+06	110475	111564	65740.1	171291	129349	229374	130023	51277.3	239285	146414	92462.6	100549	65968.3	51545.6	336263	138375	172714	34927	150069	735891	1.52249e+06		4.13633	-0.700337	-0.604418	-1.34313	-0.244809	-0.210487	0.13901	-0.312941	-1.66086	0.344922	-0.427491	-0.428203	0.268347	0.0628764	-0.272373	0.753617	-0.565441	0.656742	-1.13484	0.429251	1.19556	1.93149		0.0202676	0.499255	0.499842
P46459	855310	1.98515e+06	1.27351e+06	463373	1.31765e+06	2.16421e+06	2.76201e+06	2.71296e+06	104345	338697	2.24176e+06	1.85131e+06	1.12108e+06	1.82981e+06	1.2389e+06	1.57151e+06	1.69236e+06	2.02969e+06	1.18671e+06	1.02645e+06	NA	NA		0.0675787	0.470546	0.0788932	-1.44992	-0.0701714	0.989692	0.879334	1.17569	-3.32475	-2.04195	0.544392	1.14019	0.871265	1.64209	1.28772	0.0543299	0.209483	1.19419	0.990969	0.284635	NA	NA		0.499688	0.499255	0.499842
P46776	74687.4	547433	480574	385055	632352	437964	667331	527433	401572	843675	723372	415919	176930	220602	173459	552815	587586	367134	222094	250341	1.17753e+06	1.05006e+06		-2.22859	0.0356261	0.0594565	-0.273027	0.238225	0.0500986	0.183258	0.204995	0.0451577	0.727143	0.351717	0.342194	-0.439128	0.0981	-0.115641	-0.0751141	0.033219	0.149967	-0.00640378	-0.378844	0.237221	-0.252893		0.169604	0.499255	0.499842
P46777	2.88151e+06	3.43414e+06	2.94076e+06	2.43325e+06	2.73536e+06	3.19458e+06	3.55192e+06	3.2532e+06	2.43175e+06	3.01251e+06	3.42791e+06	2.51156e+06	2.52098e+06	2.64003e+06	2.35748e+06	2.08129e+06	2.06812e+06	2.3449e+06	2.3034e+06	2.17356e+06	948072	1.13623e+06		0.465462	-0.132699	-0.0864143	-0.394036	-0.384845	0.136977	-0.18218	0.0122793	0.0625908	-0.172147	-0.267677	0.135184	0.631393	0.669349	0.774255	-0.933223	-0.888871	-0.0669673	0.531888	-0.0410307	-0.73351	-0.6959		0.499688	0.499255	0.499842
P46778	413132	751926	667463	496386	720424	706621	742807	702814	582227	861777	859171	764898	509526	657684	568211	976554	826157	762000	662063	628071	3.22849e+06	5.55892e+06		-0.41514	-0.37159	-0.278431	-0.719374	-0.364124	-0.0818799	-0.480162	-0.241512	-0.129091	-0.0210335	-0.277684	0.419292	0.29488	0.722829	0.727821	-0.0499311	-0.258416	0.336977	0.720466	0.157878	-0.500997	0.0383223		0.499688	0.499255	0.499842
P46779	286062	566386	441090	579056	752950	524816	523729	422311	285887	508422	298374	200516	97129.4	96935.3	68718.4	405704	403421	162496	103314	146505	1.04495e+06	1.14763e+06		0.276213	0.653088	0.467995	0.871711	1.02104	0.866604	0.365868	0.429084	0.0358477	0.492097	-0.40794	-0.225448	-0.787374	-0.536355	-0.932046	0.00964679	0.014363	-0.509826	-0.582409	-0.632349	0.234219	0.0463284		0.499688	0.499255	0.499842
P46781	151598	273339	250841	207777	330423	164628	249492	151922	147286	461549	298258	116948	43883.6	54519.4	41977.7	395613	623020	99682.2	49648.1	129613	2.29021e+06	1.70718e+06		0.0077562	0.286251	0.315783	0.0441758	0.474092	-0.1616	-0.0438195	-0.394036	-0.299899	1.02693	0.295954	-0.355621	-1.27627	-0.659853	-0.956485	0.670839	1.35437	-0.532788	-0.966657	-0.119474	0.987916	0.221066		0.499688	0.499255	0.499842
P46782	575594	814740	729314	698523	807706	548458	616994	583006	715211	758339	677508	635098	578175	305926	351007	1.10658e+06	870456	579286	374862	679180	1.55561e+06	2.1781e+06		0.130181	-0.143995	-0.0584364	-0.116355	-0.114448	-0.363293	-0.670779	-0.412659	0.216376	-0.137665	-0.511747	0.244271	0.579171	-0.238978	0.153116	0.219901	-0.10948	0.0620406	-0.00829313	0.36394	0.252701	0.457287		0.499688	0.499255	0.499842
P46783	139732	378803	262528	138238	258624	186955	248420	215736	210274	367961	239179	134850	100857	104243	81726.4	277638	225701	177341	101399	128564	230447	545381		-0.230372	0.687808	0.269162	-0.66213	-0.014461	-0.0780881	-0.157559	0.0212725	0.0791291	0.572991	-0.129234	-0.267229	-0.146749	0.241982	-0.0534009	0.0429744	-0.262095	0.234365	0.000694177	-0.233678	-1.09685	-0.145204		0.499688	0.499255	0.499842
P46821	3.03867e+06	4.15415e+06	3.58035e+06	4.49318e+06	3.13738e+06	3.6784e+06	4.06456e+06	3.79253e+06	5.46666e+06	3.30167e+06	6.86174e+06	6.01605e+06	3.26026e+06	4.86452e+06	4.01377e+06	7.0322e+06	5.07418e+06	5.37735e+06	4.02059e+06	4.57194e+06	9.6343e+06	8.12686e+06		-0.19827	-0.521701	-0.480472	-0.200627	-0.84456	-0.359493	-0.703297	-0.449565	0.689843	-0.721605	0.0548913	0.670997	0.241399	0.738216	0.809956	0.198816	-0.218342	0.407145	0.617915	0.293155	0.222044	-0.194697		0.499688	0.499255	0.499842
P46940	4336.23	106435	84954.7	69378.7	169976	85005.3	107449	62797.7	6325.01	75001.5	152020	4085.92	1814.52	8129.77	1880.73	109713	113796	28699.7	4293.4	19848.2	345072	314967		-1.83367	1.30511	0.912545	0.710171	1.57974	1.21121	1.00109	1.72702	-2.86364	0.63497	1.65339	-2.03592	-2.57196	-0.59117	-1.85436	1.09611	1.1624	0.20509	-2.04384	-0.419038	0.153749	-0.499497		0.271953	0.345072	0.362513
P46977	250846	75777.1	94959.3	276465	124017	75364.6	127879	44797.7	248950	341453	84677	103548	56160.5	56120.3	24258.8	71733.3	96814.6	66702.3	17666.7	63476.4	24390.5	239835		1.69706	-0.654438	-0.331787	1.33245	-0.27221	-0.431561	-0.171662	-1.28192	1.18216	1.45306	-0.655028	0.292585	0.0243977	0.685959	-0.637611	-0.963104	-0.505633	-0.0420518	-1.44943	-0.182632	-1.96653	0.971523		0.401491	0.499255	0.499842
P47755	194605	574763	349628	662847	469936	452376	610516	512548	247545	500512	496802	121996	64158.7	57589.5	51496.1	497440	560458	122199	90348.9	107682	1.06847e+07	6.34302e+06		-0.0976279	0.804507	0.286713	1.2363	0.499411	0.797312	0.75068	0.859766	0.0313198	0.654067	0.490066	-0.779623	-1.24876	-1.20788	-1.22568	0.467715	0.663458	-0.788712	-0.648366	-0.934462	1.69346	0.599572		0.499688	0.497436	0.499842
P47756	193658	207597	234538	259654	189142	160713	210274	252308	162623	138280	249200	102049	62894.3	41825.1	53180.7	282424	244983	88782.9	74105.7	107080	8.75378e+06	4.71401e+06		0.634152	0.10795	0.469861	0.62175	-0.0949553	0.0495921	-0.048896	0.607107	0.130079	-0.5058	0.269656	-0.292587	-0.490814	-0.835289	-0.367027	0.414764	0.215191	-0.464244	-0.130708	-0.155642	1.49943	0.250385		0.499688	0.499255	0.499842
P47897	915072	174398	177299	154835	254601	162619	334573	182700	94852.1	215823	328601	155122	117298	95052.2	196224	187674	277875	162885	122060	153216	186508	350349		2.53148	-0.490562	-0.351309	-0.523512	-0.0789909	-0.318702	0.25207	-0.25903	-1.15575	-0.256268	0.314536	-0.0971952	0.0446565	0.0924689	1.22788	-0.570237	0.0156838	0.0849432	0.250261	-0.00260655	-0.905381	-0.300273		0.217755	0.499255	0.499842
P47914	122252	466669	325825	305239	488727	202607	263745	205846	240434	314274	290516	155470	114907	95762.3	68953.7	361915	306504	180805	135743	131989	2.32618e+06	2.77255e+06		-0.714931	0.632424	0.288663	0.18971	0.650796	-0.279443	-0.384206	-0.370654	0.0545086	0.0494169	-0.178718	-0.330321	-0.26689	-0.289125	-0.658548	0.109666	-0.123892	-0.0816133	0.0922252	-0.517192	0.63651	0.570892		0.499688	0.499255	0.499842
P47929	2381.99	0	4699.6	0.197444	0	0	0	0	780.474	383675	0	0	0	0	0	0	0	0	0	0	NA	NA		1.0557	NA	3.71135	-13.691	NA	NA	NA	NA	-0.498666	10.8047	NA	NA	NA	NA	NA	NA	NA	NA	NA	NA	NA	NA		0.499688	NA	8.39e-08
P48047	4727.87	13163.5	3600.3	9708.72	17624.6	11768.4	17352	15483.6	14621.6	23911.7	8552.07	7538.51	1951.59	728.255	2963.83	10901.8	8863.06	4302.45	4588.44	3326.79	NA	NA		-0.608239	0.560622	-1.50207	-0.0842171	0.3396	0.605919	0.541941	1.19183	0.477934	1.18615	-0.246307	0.0212349	-1.20468	-1.58534	0.575698	-0.0889899	-0.479012	-0.311199	0.837804	-0.947226	NA	NA		0.499688	0.499255	0.133253
P48147	NA	NA	NA	NA	NA	NA	NA	NA	NA	NA	NA	NA	NA	NA	NA	NA	NA	NA	NA	NA	346.729	896.813		NA	NA	NA	NA	NA	NA	NA	NA	NA	NA	NA	NA	NA	NA	NA	NA	NA	NA	NA	NA	-1.8912	-0.852693		NA	NA	NA
P48163	NA	NA	NA	NA	NA	NA	NA	NA	NA	NA	NA	NA	NA	NA	NA	NA	NA	NA	NA	NA	8202.59	1017.68		NA	NA	NA	NA	NA	NA	NA	NA	NA	NA	NA	NA	NA	NA	NA	NA	NA	NA	NA	NA	1.54254	-2.92444		NA	NA	NA
P48200	NA	NA	NA	NA	NA	NA	NA	NA	NA	NA	NA	NA	NA	NA	NA	NA	NA	NA	NA	NA	0	0		NA	NA	NA	NA	NA	NA	NA	NA	NA	NA	NA	NA	NA	NA	NA	NA	NA	NA	NA	NA	NA	NA		NA	NA	NA
P48444	251178	121376	144132	65191.6	157837	112592	232298	105425	118943	126754	142015	105553	110293	51687	60156	236960	187327	97737.2	69629	95179.6	174882	328613		1.31496	-0.311972	-0.00665244	-1.12537	-0.166046	-0.182673	0.389499	-0.382269	-0.206181	-0.362717	-0.229404	-0.00637562	0.650294	0.0155108	0.244166	0.473961	0.12977	0.0890735	0.163869	0.00855996	-0.416495	0.147433		0.496409	0.499255	0.499842
P48454	4703.36	5866.88	6209.22	5513.59	23682.9	8796.31	10185	8044.61	27098.2	6957.47	6884.32	11216.5	4866.57	89.0915	633.788	1118.4	8549.69	2831.3	1987.52	16453.1	NA	NA		-0.41221	-0.384152	0.667012	0.350407	1.06361	0.448152	0.0155353	0.500009	1.65888	-0.388526	-0.278752	0.869384	0.430042	-3.42893	-1.47983	-2.18994	-0.267532	-0.683013	-0.13591	1.70581	NA	NA		0.499688	0.499255	0.487969
P48507	1.828e+06	1.94435e+06	1.71998e+06	1.66936e+06	1.5384e+06	1.7801e+06	1.08045e+06	1.2211e+06	1.47847e+06	832872	109505	789491	226086	154232	108546	61534.3	100633	61701.3	174904	163509	170344	42531.7		2.40196	1.95027	1.8238	1.83954	1.36723	2.0623	0.815138	1.39783	1.68704	0.575246	-2.48014	1.12729	-0.146349	-0.237617	-0.751011	-3.39526	-2.65899	-2.46684	-0.335973	-1.05375	3.61387	1.18207		0.248021	0.119654	0.027528
P48556	8.27502e+07	6.33602e+07	6.00068e+07	5.02091e+07	4.85668e+07	4.87494e+07	4.46142e+07	7.0338e+07	6.87238e+07	3.8131e+07	4.2668e+07	4.59289e+07	4.23309e+07	4.09722e+07	4.47665e+07	3.01293e+07	2.53595e+07	4.14422e+07	4.92139e+07	4.01214e+07	697733	741435		1.04719	-0.0450563	0.126032	-0.21801	-0.325326	-0.125592	-0.757565	0.294771	0.975401	-0.662584	-0.83571	0.0190441	0.345341	0.113763	0.707117	-1.22363	-1.39688	-0.251153	0.660508	-0.161767	0.583784	0.600115		0.499688	0.499255	0.499842
P48634	24890.3	134731	108534	68673.5	113138	73594.7	162730	135984	86115.1	80224.7	138748	138079	55570	65392.6	66177.7	183372	131323	82638.8	67866.4	62334.1	1.01314e+06	501097		-1.75831	0.210347	-0.0574561	-0.677733	-0.287533	-0.446738	0.229182	0.363648	-0.314057	-0.675167	0.103372	0.763318	-0.00257357	0.722331	0.747237	0.46049	-0.0314974	0.201724	0.488964	-0.256024	1.2061	-0.210709		0.295977	0.499255	0.499842
P48643	2.36382e+06	4.16789e+06	3.45801e+06	3.36123e+06	3.6895e+06	3.50119e+06	5.03864e+06	4.70846e+06	2.56253e+06	3.01726e+06	4.6917e+06	1.71488e+06	1.52117e+06	1.76702e+06	1.39327e+06	5.39363e+06	4.73174e+06	1.93178e+06	1.65884e+06	2.04319e+06	3.13479e+06	5.34455e+06		0.127802	0.128199	0.122819	0.0429066	0.0354098	0.235855	0.29473	0.529674	0.146539	-0.201539	0.158893	-0.486969	-0.173826	-0.00352297	-0.0580989	0.454864	0.319224	-0.409862	-0.00178826	-0.189769	-0.274901	0.305804		0.499688	0.499255	0.499842
P48729	NA	NA	NA	NA	NA	NA	NA	NA	NA	NA	NA	NA	NA	NA	NA	NA	NA	NA	NA	NA	0	0		NA	NA	NA	NA	NA	NA	NA	NA	NA	NA	NA	NA	NA	NA	NA	NA	NA	NA	NA	NA	NA	NA		NA	NA	NA
P48735	595.187	25.3215	99.3293	0	14.3006	560.391	1289.04	626.826	2253.1	5141.45	3516.44	1684.43	557.985	18.8165	1900.22	4240.53	15393.3	16.3212	4332.58	11712.2	NA	NA		-0.296313	-5.15783	-1.65489	NA	-6.65339	-0.270884	0.521087	0.266893	1.02521	2.79293	2.36166	0.779808	0.328093	-3.28504	3.24874	2.39944	4.0315	-5.05123	4.5237	4.03312	NA	NA		0.499688	6.62e-09	0.089935
P48739	78968.9	315866	169297	296080	244628	181390	326464	179977	123215	364680	331320	145897	75724.9	169027	76896.3	201415	250887	184224	104150	96576.3	9636.85	25290.2		-0.949218	0.545289	-0.389957	0.514253	-0.175872	-0.0494322	0.301393	-0.139563	-0.783147	0.628918	0.452409	-0.12014	-0.457884	1.38327	0.142765	-0.348689	-0.0107352	0.538481	0.259077	-0.488289	-1.42438	-0.442961		0.499688	0.499255	0.499842
P49005	NA	NA	NA	NA	NA	NA	NA	NA	NA	NA	NA	NA	NA	NA	NA	NA	NA	NA	NA	NA	3504.87	11383		NA	NA	NA	NA	NA	NA	NA	NA	NA	NA	NA	NA	NA	NA	NA	NA	NA	NA	NA	NA	-0.731353	0.57455		NA	NA	NA
P49006	313109	677805	484759	847487	681156	287321	398321	357842	303283	559300	413221	239525	212996	113243	154119	381270	414645	195771	161807	144356	626030	757055		0.169817	0.672132	0.364835	1.19399	0.630061	-0.274865	-0.285882	-0.0632316	-0.114023	0.392407	-0.16988	-0.201806	0.136219	-0.555642	0.0226215	-0.327971	-0.189352	-0.478554	-0.161883	-0.899019	-0.161174	-0.205122		0.499688	0.499255	0.499842
P49189	24418.8	58070.6	18576	6030.08	54918.2	3479.02	7234.86	9647.03	21405.1	3288.7	1539.81	2451.18	733.215	100.179	553.542	27841.5	21207.6	12447.9	556.014	9955.62	1.47756e+06	2.11001e+06		2.33927	2.99732	1.13666	-0.368651	2.32485	-0.961604	-0.518429	0.540138	1.414	-1.5023	-2.63114	-1.30042	-2.31459	-4.3475	-1.86653	1.55258	1.146	1.60286	-2.3123	1.12321	0.429466	0.349486		0.26056	0.00546317	0.228762
P49207	127046	150632	166488	126209	160413	101175	116133	123476	171997	183534	117640	81665	44124.4	40928.5	65677.8	134541	98592.9	84572.6	70070.9	45722.9	511372	975425		0.485588	0.196591	0.413755	0.0567447	0.0736272	-0.146742	-0.444841	0.0424201	0.554847	0.38079	-0.319561	-0.187231	-0.523865	-0.184811	0.539267	-0.176838	-0.636064	0.0426843	0.345904	-0.901212	0.130019	0.734055		0.499688	0.499255	0.499842
P49321	1.12245e+08	3.19599e+08	1.86319e+08	6.85533e+07	1.89577e+08	2.08613e+08	2.77334e+08	2.80994e+08	1.01535e+07	1.05178e+08	3.51406e+08	1.18882e+08	1.92075e+08	3.07563e+08	1.73994e+08	2.8292e+08	2.50077e+08	3.17646e+08	1.65919e+08	2.06559e+08	1.14571e+06	1.86805e+06		-0.369251	0.629627	0.0819231	-1.48278	0.0383599	0.241559	0.201317	0.562725	-3.52939	-0.844036	0.585938	-0.386493	0.673309	1.11449	0.799835	0.450721	0.376539	0.9145	0.576207	0.437161	-1.01258	-0.283246		0.499688	0.499255	0.499842
P49327	1.83843e+06	6.04064e+06	4.02783e+06	3.28663e+06	4.9558e+06	4.02189e+06	4.82996e+06	4.5278e+06	1.92299e+06	3.93865e+06	6.322e+06	1.93445e+06	1.58885e+06	1.45663e+06	1.19486e+06	4.52102e+06	5.79933e+06	2.91131e+06	1.51937e+06	2.57888e+06	6.06502e+06	7.61866e+06		-0.381426	0.574026	0.237469	-0.115057	0.370807	0.322234	0.10597	0.358375	-0.35186	0.0828313	0.482051	-0.44991	-0.255006	-0.461605	-0.425467	0.0830615	0.518095	0.061036	-0.266058	0.0111768	-0.57584	-0.4231		0.499688	0.499255	0.499842
P49354	NA	NA	NA	NA	NA	NA	NA	NA	NA	NA	NA	NA	NA	NA	NA	NA	NA	NA	NA	NA	0	0		NA	NA	NA	NA	NA	NA	NA	NA	NA	NA	NA	NA	NA	NA	NA	NA	NA	NA	NA	NA	NA	NA		NA	NA	NA
P49368	636449	1.28931e+06	956274	1.22293e+06	1.23121e+06	941881	1.39385e+06	1.04439e+06	866143	1.04403e+06	1.35905e+06	1.98804e+06	544961	542990	309905	1.76768e+06	1.65934e+06	607989	348092	820857	1.92084e+06	3.21582e+06		-0.136881	0.0657649	-0.108293	0.257195	0.0684187	-0.0191746	0.0913974	-0.0171066	0.0973332	-0.100377	0.0395766	1.47544	0.0300264	0.0723847	-0.539239	0.468127	0.414435	-0.364052	-0.600974	0.191296	-0.447007	0.0507149		0.499688	0.499255	0.499842
P49411	600847	697408	872886	701272	679196	693465	1.23779e+06	566505	618916	778939	675126	816871	482470	334580	268272	823116	658340	490438	370045	712832	3.87843e+06	6.1793e+06		0.2973	-0.314977	0.284198	-0.0380421	-0.290085	0.0561291	0.443384	-0.394016	0.10984	-0.0104732	-0.462906	0.686165	0.380556	-0.0919436	-0.208575	-0.142057	-0.437654	-0.140027	0.0260715	0.511329	0.0411557	0.456518		0.499688	0.499255	0.499842
P49419	18055.1	148587	97726.8	129879	165562	193215	282644	178899	85648.6	215438	352120	124740	142836	161073	93173.7	283585	339224	182784	139510	151869	453484	257501		-3.04765	-0.456853	-0.985273	-0.521573	-0.474523	0.197186	0.259873	-0.0297619	-1.07303	-0.00147373	0.68377	-0.168846	0.598201	1.17276	0.400879	0.307232	0.575323	0.535046	0.722487	0.250365	0.478139	-0.703196		0.0377859	0.499255	0.367673
P49458	11522.9	30373	32510.7	43102.9	44622.1	49986.4	65131.9	21940.3	27147.1	20150.3	16900.7	35143.1	6003.65	461.068	1562.74	12123.3	21398.6	9796.96	4102.31	6613.5	NA	NA		0.0638445	0.986573	0.930006	1.4225	0.897171	1.94275	1.6898	0.802536	0.630814	0.0937439	-0.110804	1.56526	-0.281905	-3.13538	-1.26943	-0.789294	0.053891	0.154991	-0.240283	-0.652221	NA	NA		0.499688	0.439469	0.356622
P49588	110745	167353	240963	213099	345605	221266	256529	194605	226906	160062	321981	133269	114093	72919.9	110058	314920	311086	182168	79927.3	130249	10844.6	14443.3		-0.480191	-0.433511	0.102239	-0.00817022	0.305852	0.212401	-0.0906472	-0.0573873	0.0922828	-0.629665	0.376372	-0.288289	0.117839	0.096127	0.640854	0.282831	0.275789	0.487095	-0.169464	-0.0778193	-1.19895	-1.22544		0.499688	0.499255	0.499842
P49590	NA	NA	NA	NA	NA	NA	NA	NA	NA	NA	NA	NA	NA	NA	NA	NA	NA	NA	NA	NA	0	0		NA	NA	NA	NA	NA	NA	NA	NA	NA	NA	NA	NA	NA	NA	NA	NA	NA	NA	NA	NA	NA	NA		NA	NA	NA
P49591	1254.36	19766.8	925.345	5603.7	22030.4	15571.9	38861.7	7740.6	23954.1	13395.5	3235.35	892.345	4981.85	1940.83	860.543	4707.57	30040.7	2015.7	895.474	3552.37	0	16943.6		-1.96387	1.83842	-2.79888	-0.24704	1.36079	1.70648	2.42291	0.841972	1.87034	1.00659	-0.992422	-2.49826	0.871535	0.57141	-0.609579	-0.644414	2.02286	-0.772323	-0.923098	-0.185014	NA	-0.0702881		0.239969	0.150301	0.000927761
P49638	1.7211e+07	186060	252094	181865	264933	245210	305378	209995	221324	210090	282080	121660	81475.2	82312.8	73750.2	300473	320431	152104	95630.5	126506	NA	NA		6.77328	-0.647065	-0.0421822	-0.520642	-0.226802	0.0712635	-0.106651	-0.276995	-0.0754071	-0.517856	-0.146619	-0.675522	-0.72775	-0.395492	-0.478038	-0.0995236	0.00305888	-0.262897	-0.352698	-0.522764	NA	NA		2.02e-05	0.499255	0.499842
P49643	NA	NA	NA	NA	NA	NA	NA	NA	NA	NA	NA	NA	NA	NA	NA	NA	NA	NA	NA	NA	0	12439.6		NA	NA	NA	NA	NA	NA	NA	NA	NA	NA	NA	NA	NA	NA	NA	NA	NA	NA	NA	NA	NA	0.258921		NA	NA	NA
P49720	559464	239720	231935	296669	331747	178515	287226	291580	184434	228653	282725	44356.9	61342.7	53132.5	49028.7	403675	711762	126290	49772.2	148211	268581	483016		1.78475	-0.0309522	0.0330975	0.429544	0.2992	-0.194642	0.010375	0.421807	-0.182937	-0.185232	0.0766347	-1.97502	-0.934437	-0.785072	-0.848817	0.554874	1.40056	-0.307098	-1.09815	-0.0662885	-0.282193	0.257764		0.377677	0.499255	0.499842
P49721	85194.9	5223.92	11384.2	9167.29	20178.2	4368.35	8578.95	5313.24	9641.43	3179.9	21224.7	5174.32	898.425	0	0	27875.3	66248.9	14801.1	2790.1	5868.74	NA	NA		4.36582	-0.370239	-0.39055	-0.682757	-0.0446663	-1.48608	-1.11483	-1.06462	-0.690235	-2.45148	0.501122	-1.08688	-1.87349	NA	NA	0.728356	2.01173	1.01978	0.501793	0.446079	NA	NA		0.0125251	0.499255	0.499842
P49736	48765.2	111580	111219	139127	187116	118561	186434	133112	117249	102324	194789	76525.9	30653.1	52633.9	32075.9	134593	146888	81254.2	31362.5	55823.3	326655	496995		-0.659369	0.0251697	0.064094	0.460376	0.539593	0.354315	0.521433	0.427144	0.226827	-0.220445	0.701856	-0.0266261	-0.791643	0.520322	-0.219932	0.0934503	0.229986	0.284227	-0.554399	-0.31976	-0.33176	-0.0901336		0.499688	0.499255	0.499842
P49750	NA	NA	NA	NA	NA	NA	NA	NA	NA	NA	NA	NA	NA	NA	NA	NA	NA	NA	NA	NA	78594.6	215821		NA	NA	NA	NA	NA	NA	NA	NA	NA	NA	NA	NA	NA	NA	NA	NA	NA	NA	NA	NA	-0.396636	0.652823		NA	NA	NA
P49755	147206	234584	269990	212165	298224	303528	315386	228685	199617	177868	219462	452005	144233	183033	124720	299009	283771	167360	86899.9	195550	188367	1.52646e+06		-0.547894	-0.421363	-0.0840252	-0.420372	-0.196873	0.247585	-0.197681	-0.287262	-0.391543	-0.90346	-0.652983	1.13765	-0.00973708	0.681992	0.179065	-0.242219	-0.316838	-0.248019	-0.624779	-0.00528099	-0.535556	2.24746		0.499688	0.499255	0.499842
P49756	21432	74287.2	59026.9	77955.2	56164	44251.8	86998.2	69550.2	70154.4	101124	105653	144188	59830	49203.7	35864.5	99185.2	90472.5	67115.1	65031.8	48305.7	140805	124569		-1.52334	-0.2504	-0.618177	-0.124702	-1.0386	-0.788446	-0.317451	-0.187789	-0.279401	0.0715032	0.103494	1.21671	0.558964	0.966126	0.405518	-0.0537873	-0.178825	0.415564	0.938683	-0.142931	0.0917117	-0.571042		0.365192	0.499255	0.499842
P49773	123373	412553	241267	212675	338787	258033	354394	287718	192666	377706	361656	88440.3	68844.8	62180.6	63120.4	320377	332178	146433	77150.6	115148	134396	171011		-0.426884	0.824786	0.119196	-0.0265784	0.349293	0.388069	0.357173	0.438186	-0.109486	0.594514	0.485142	-0.920596	-0.726476	-0.476895	-0.414176	0.250065	0.305509	-0.030704	-0.395437	-0.399428	-0.685334	-0.667626		0.499688	0.497436	0.499842
P49790	37469.8	67741.9	95411.6	103044	321107	50373.5	141379	47968.1	168717	45033.2	63846.1	152890	66437.8	24715.4	23136.9	58574.5	100256	76208.2	46192.6	83308.9	1.07907e+06	473620		-0.805334	-0.487259	0.0258624	0.210757	1.50614	-0.697854	0.319712	-0.853361	0.952908	-1.22111	-0.736089	1.21161	0.600281	-0.256196	-0.408431	-0.924026	-0.113642	0.469539	0.294408	0.538582	2.30802	0.645727		0.499688	0.499255	0.499842
P49792	26251.9	63904.4	135593	106510	150303	106867	147660	104835	134623	152785	182765	163138	108706	59947.8	70208.5	216557	211848	133796	76150.9	158960	325425	491386		-2.05142	-1.27317	-0.105828	-0.402953	-0.248115	-0.26766	-0.292212	-0.397431	-0.0307856	-0.0919605	0.138857	0.633515	0.622026	0.233135	0.46952	0.332884	0.305951	0.55133	0.291745	0.765582	0.577792	0.814322		0.21625	0.353584	0.499842
P49821	20453.1	15698.5	41502.3	8243.04	44195.5	11775.3	27692	12234	38078.8	23891.3	11605.1	4579.2	16520.4	0	4916.02	8750.78	10661.4	397.493	6568.2	8842.21	NA	NA		1.09268	0.179416	1.49605	-0.904124	1.07249	-0.0508238	0.590966	0.126904	1.32248	0.5358	-0.482048	-1.33365	1.42125	NA	0.661429	-1.0926	-0.818687	-4.51239	0.676253	-0.0449461	NA	NA		0.499688	0.499255	0.0876735
P49902	389302	587931	629426	471132	610044	608643	717993	686191	361931	533458	1.25674e+06	384042	326825	597231	453653	861218	596653	493114	382073	413786	463584	353301		-0.228789	-0.30532	0.00968873	-0.424501	-0.268543	0.0900247	-0.158282	0.148327	-0.566225	-0.409082	0.725443	-0.230005	0.0236897	1.13676	0.867209	0.13401	-0.39496	0.140212	0.353804	-0.0813672	0.0949204	-0.630443		0.499688	0.499255	0.499842
P49903	NA	NA	NA	NA	NA	NA	NA	NA	NA	NA	NA	NA	NA	NA	NA	NA	NA	NA	NA	NA	258646	303318		NA	NA	NA	NA	NA	NA	NA	NA	NA	NA	NA	NA	NA	NA	NA	NA	NA	NA	NA	NA	-0.317959	-0.433882		NA	NA	NA
P49915	173516	284096	305328	255127	419329	226706	460724	290417	361325	456688	495566	156672	86750.8	110242	71483.4	758221	937846	354916	92660.2	266453	1.30093e+06	1.29356e+06		-0.343829	-0.244867	0.0460779	-0.221531	0.274435	-0.255843	0.301183	-0.00119214	0.50571	0.456633	0.474181	-0.469039	-0.829389	-0.214752	-0.745655	1.06657	1.39548	0.779437	-0.616769	0.383657	0.403727	0.0675194		0.499688	0.499255	0.499842
P49916	504.807	0	23395.1	1702.67	10927.1	0	0	588.08	314.039	0	0	32175.5	102.84	0	0	48370	0	0	0	1985.77	NA	NA		-2.30735	NA	2.5394	-0.807751	0.656235	NA	NA	-1.73277	-3.53428	NA	NA	3.26457	-3.8593	NA	NA	3.36592	NA	NA	NA	0.213876	NA	NA		0.153859	NA	0.000706417
P49959	6616.43	8505.66	16525.1	4858.87	10607.3	18109.3	31016.4	13790.6	19329.1	17111.4	20003.7	14298.5	19512	3506.02	1223.18	20728.1	26460.9	12541.5	2775.24	12920	NA	NA		-0.681537	-0.824061	0.0221507	-1.77265	-1.16223	0.519434	0.6806	0.222362	0.220661	-0.0468001	0.257863	0.310444	1.59554	0.0378293	-1.52072	0.129836	0.477612	0.628723	-0.709044	0.454373	NA	NA		0.499688	0.497436	0.499842
P50213	37208	42548.6	46268.8	35546	45644.7	20008.4	33335.7	20232.6	45466	31878.3	35086.2	7361.48	12748.8	9163.21	3581.18	42458.4	57005.8	66657	9008.41	19448.8	141462	175568		0.839237	0.410712	0.396219	0.165364	-0.0207134	-0.468896	-0.33623	-0.498197	0.459093	-0.219314	-0.0927899	-1.76183	-0.197816	0.230412	-1.27812	0.0866377	0.523981	1.97663	-0.35511	0.0215959	0.442425	0.173337		0.499688	0.499255	0.499842
P50395	238298	922093	752912	756665	1.16552e+06	742456	840088	697777	738589	621982	769879	164958	89884.5	144376	206643	1.07908e+06	1.08319e+06	313741	176783	243013	515375	1.05869e+06		-0.70685	0.567027	0.498507	0.507161	0.929077	0.601573	0.295525	0.379929	0.74475	0.0586993	0.203624	-1.25474	-1.67841	-0.795818	-0.0995432	0.689862	0.716355	-0.322974	-0.592627	-0.654675	-1.3342	-0.574826		0.499688	0.499255	0.499842
P50402	3.49576e+06	540879	807306	1.35031e+06	576381	638783	2.19495e+06	538676	720392	900198	582583	1.70095e+06	710919	347481	328065	702031	673536	649087	273581	1.96837e+06	1.60787e+06	4.55784e+06		2.54627	-1.06092	-0.200902	0.568386	-0.903649	-0.434526	0.926558	-0.836906	-0.0362273	-0.16491	-1.04917	1.40939	0.588875	-0.399197	-0.274774	-0.747991	-0.773706	-0.0890913	-0.790454	1.65364	-0.295049	0.975849		0.216377	0.432675	0.499842
P50416	9658.45	1244.09	7090.19	1628.23	9059.59	105.087	1946.72	0	5899.79	0	4684.66	1470.4	11649	0	506.786	3599.73	3979.02	1155.17	624.198	52561.1	NA	NA		1.27544	-0.846632	0.763582	-1.80665	0.45972	-4.37487	-1.63645	NA	0.115662	NA	0.0308339	-1.483	2.54825	NA	-1.04906	-0.592776	-0.601981	-1.2272	-1.03831	4.22574	NA	NA		0.498046	0.491825	0.434271
P50454	136805	453097	239187	516094	339426	236126	419169	381391	101441	288791	246557	77391.2	86873.7	53785.1	45500.5	227813	247853	71039.1	102801	98666.8	1.85439e+06	1.13979e+06		-0.158436	1.03609	0.233501	1.39031	0.499517	0.366296	0.718574	0.966401	-0.878164	0.316079	0.00645267	-0.985391	-0.270261	-0.676461	-0.840755	-0.157971	-0.0264884	-1.04195	0.110073	-0.533741	1.0484	-0.00554736		0.499688	0.43458	0.499842
P50502	97800.2	233240	249847	220411	281827	410636	222801	199271	121540	226648	302406	173799	169886	166588	184741	237925	231787	206232	124678	138355	1.1766e+06	1.95469e+06		-0.829535	-0.174919	0.113703	-0.0738219	0.0501415	0.993158	-0.414248	-0.196708	-0.746102	-0.218774	0.103753	0.0528233	0.535918	0.761527	1.03107	-0.292755	-0.318613	0.336443	0.18901	-0.226002	-0.694596	-0.266817		0.499688	0.499255	0.499842
P50570	10365.9	8090.25	5061.28	15675.4	17782.4	4804.76	13556.5	7193.63	17970.2	16978.7	15784.3	2511.11	4608.89	1201.96	807.098	6847.49	8809.56	26058.8	1184.74	5745.41	26206.2	23792.9		0.722589	0.00312796	-0.784068	0.800097	0.535232	-0.552605	0.346972	0.216983	0.95152	0.846096	0.853766	-1.43997	0.262571	-0.647838	-1.20238	-0.596161	-0.304343	2.54261	-1.01403	0.0476143	0.938048	0.197229		0.499688	0.499255	0.45767
P50579	25457.5	49220.8	44684	16553.3	90246.9	30720	113561	28879.4	9313.88	39830.9	73297	26305.6	11758.3	16621.9	13348.3	79722.9	76734.4	18312.7	10988.1	27406.4	NA	NA		0.0660981	0.428345	0.130215	-1.20321	0.777874	-0.0408315	1.28813	-0.170651	-2.15389	-0.104816	0.805016	-0.0869568	-0.530588	0.94155	0.506651	0.820734	0.757625	-0.151221	-0.246546	0.321201	NA	NA		0.499688	0.499255	0.499842
P50914	356652	728859	585700	379906	552693	517939	477465	452190	265879	551577	450923	202093	80086.9	107802	100154	672995	455695	226156	161534	184411	318262	510451		0.369649	0.820296	0.66346	0.0235751	0.328572	0.626391	0.00549	0.31151	-0.321522	0.38065	-0.0091504	-0.450781	-1.29698	-0.576588	-0.584641	0.543017	-0.0271287	-0.234928	-0.131897	-0.512154	-0.26916	0.104241		0.499688	0.497436	0.487969
P50990	839450	1.66851e+06	1.96726e+06	1.52033e+06	2.65014e+06	1.80601e+06	2.08128e+06	2.00448e+06	1.52386e+06	1.76695e+06	2.2187e+06	710373	499923	427795	591213	2.55768e+06	2.4983e+06	864533	584172	801165	4.20472e+06	5.16501e+06		-0.241685	-0.0828391	0.440152	0.0404047	0.68878	0.416951	0.154833	0.418805	0.462172	0.159027	0.219201	-0.602679	-0.638599	-0.878654	-0.143362	0.496315	0.510529	-0.407192	-0.374924	-0.385637	-0.00807961	0.0539971		0.499688	0.499255	0.499842
P50991	907775	2.69285e+06	1.967e+06	2.13301e+06	2.36698e+06	2.50615e+06	2.9582e+06	2.39152e+06	1.16636e+06	2.10494e+06	1.54103e+06	1.48532e+06	687636	622466	737599	3.00653e+06	2.47308e+06	958466	702230	962842	4.32944e+06	5.49342e+06		-0.37815	0.377643	0.1882	0.287466	0.270831	0.650682	0.422431	0.428304	-0.171894	0.167469	-0.580154	0.23458	-0.422165	-0.590979	-0.0745733	0.485976	0.246966	-0.516092	-0.357889	-0.371712	0.0427235	0.159407		0.499688	0.499255	0.499842
P50993	934513	1.17585e+06	1.122e+06	898452	871003	1.44709e+06	1.61251e+06	1.57911e+06	527117	695556	1.4602e+06	611357	716897	1.06966e+06	563088	599405	448727	931644	670955	676204	883279	728793		0.49845	0.0366508	0.22139	-0.102877	-0.360943	0.717936	0.39848	0.704666	-0.590301	-0.623334	0.264605	-0.174821	0.53719	1.24657	0.48612	-1.05244	-1.45327	0.401005	0.490625	-0.00337297	-0.11481	-0.692264		0.499688	0.499255	0.499842
P50995	NA	NA	NA	NA	NA	NA	NA	NA	NA	NA	NA	NA	NA	NA	NA	NA	NA	NA	NA	NA	0	0		NA	NA	NA	NA	NA	NA	NA	NA	NA	NA	NA	NA	NA	NA	NA	NA	NA	NA	NA	NA	NA	NA		NA	NA	NA
P51114	NA	NA	NA	NA	NA	NA	NA	NA	NA	NA	NA	NA	NA	NA	NA	NA	NA	NA	NA	NA	326953	378279		NA	NA	NA	NA	NA	NA	NA	NA	NA	NA	NA	NA	NA	NA	NA	NA	NA	NA	NA	NA	0.346372	0.184758		NA	NA	NA
P51148	169605	100804	133621	217563	171433	92916.8	119259	112854	698151	145836	79502.4	107032	34991.1	17758	27158.6	176156	206912	32312	39438.1	39568.9	96452.1	229490		1.07068	-0.267287	0.153425	0.949509	0.197304	-0.158583	-0.305859	0.0489172	2.69244	0.155149	-0.781685	0.308892	-0.724094	-1.11229	-0.53712	0.342021	0.592515	-1.17558	-0.309696	-0.938309	-0.354312	0.494872		0.499688	0.499255	0.499842
P51149	225886	236842	211443	201143	735664	187844	238057	231887	232621	193098	160804	103049	35750.6	26509.5	41768.6	178360	179527	51859.1	27576.7	57654.3	439301	461168		0.938641	0.464426	0.389407	0.356377	1.97018	0.381963	0.231294	0.58321	0.638659	0.0624666	-0.255045	-0.22661	-1.23551	-1.28209	-0.564153	-0.155509	-0.144219	-1.11067	-1.46133	-0.963155	-0.0427767	-0.310558		0.499688	0.499255	0.499842
P51531	6789.67	34164.1	23174.5	13355.4	64876.7	26668.6	38137.3	51161.2	48151.3	38058.2	44185.9	45788.2	15994	7121.19	7104.42	41931.1	42392	6135.57	9153.64	14464.5	NA	NA		-1.57185	0.234423	0.52249	-1.18831	0.591985	0.0896633	-0.0277976	1.06404	0.639752	0.16035	0.390775	1.08289	0.295332	0.0296434	-0.0341719	0.18328	0.19464	-1.44702	-0.110866	-0.310389	NA	NA		0.361256	0.499255	0.499842
P51532	NA	NA	NA	NA	NA	NA	NA	NA	NA	NA	NA	NA	NA	NA	NA	NA	NA	NA	NA	NA	6248.21	27230.8		NA	NA	NA	NA	NA	NA	NA	NA	NA	NA	NA	NA	NA	NA	NA	NA	NA	NA	NA	NA	1.12448	1.75667		NA	NA	NA
P51571	195678	71386.5	61241.8	379182	144339	43296.1	211281	51434.5	195329	62296.8	61314.7	437961	55889.7	98775.4	40521	40402.6	88136.8	477985	26785.9	77565.3	1.09868e+06	1.32064e+06		1.23581	-0.806577	-0.951305	1.80815	0.0468178	-1.29435	0.56131	-1.14859	0.875428	-1.11292	-1.17863	2.43078	-0.061391	1.20341	-0.0888657	-1.85501	-0.692649	2.71316	-0.987292	-0.00929062	0.475977	0.404949		0.499688	0.499255	0.381363
P51572	50110.4	16877.1	21358.4	11870.7	52348.9	12178.9	10234.6	4608.17	15566.9	149728	6866.22	1337.75	1950.34	543.845	3128.26	28521.7	3463.33	29229.7	18036.6	14211.7	297921	696075		2.45576	0.221323	0.403576	-0.325117	1.27995	-0.0467947	-0.955798	-1.46861	-0.0308409	3.22376	-1.34279	-3.15538	-1.79652	-2.75928	-0.172325	0.631051	-2.50272	1.92985	1.99251	0.68579	1.41337	2.06628		0.236144	0.499255	0.499842
P51610	16946.5	93047	71100.5	88237.2	101670	62389.4	111015	80519.4	75597.8	87282.4	116343	70390.6	18672.6	9275.01	23912.3	98126.4	105273	48133.4	20574.3	42771.4	NA	NA		-1.48895	0.482057	0.0126237	0.439399	0.178476	0.121221	0.421347	0.443035	0.191603	0.22989	0.632433	0.53997	-0.776052	-1.0268	0.281501	0.300878	0.417866	0.352043	-0.339809	0.0927672	NA	NA		0.371418	0.499255	0.499842
P51648	148841	78289.4	115514	98774	81346.4	73985.4	195053	87858.4	114701	213392	98734.2	94227.3	282311	50110.5	115902	224354	161757	171829	231469	207430	15850.9	175509		0.397925	-1.13661	-0.588357	-0.739514	-1.45993	-0.986869	-0.0829488	-0.802013	-0.516294	0.216283	-0.963432	-0.381233	1.90575	0.0452361	1.19771	0.193391	-0.281351	0.855161	1.86943	1.06565	-0.768832	2.32147		0.499688	0.416867	0.499842
P51659	5324.3	32891.6	32308.2	27071.5	52803.1	30389.4	50020.9	35335.8	34614.2	39367.6	61164.7	10756.6	1114.34	478.391	5180.52	74518	65443.9	11491.2	4581.6	5294.08	1.22135e+06	903615		-1.61613	0.482792	0.363023	0.227659	0.715371	0.612598	0.76536	0.777342	0.560432	0.583842	1.20961	-0.711109	-3.38556	-3.78311	-0.369179	1.4175	1.23376	-0.201261	-0.974072	-1.44696	1.06277	0.0641162		0.347092	0.499255	0.499842
P51665	661238	773803	428421	540258	484758	507563	917343	540639	583252	745663	609878	244259	188987	122133	116149	642791	741650	319940	167234	275154	414786	498951		0.827555	0.4205	-0.271189	0.0724949	-0.32954	0.120717	0.503772	0.100294	0.402145	0.366464	-0.0407359	-0.627044	-0.493096	-0.889966	-0.847729	-0.00186428	0.224241	-0.198208	-0.562388	-0.390698	0.416942	0.364591		0.499688	0.499255	0.499842
P51784	18794.4	14739.7	24070.7	8239.12	41848	26167.5	40060.2	12971.9	8692.36	10542.3	30138.4	8412.73	1978.21	2760.23	4810.22	2625.31	0	3132.14	608.844	25688.4	NA	NA		0.879044	-0.0128497	0.57191	-0.994854	0.89149	1.05875	1.0504	0.11081	-1.00415	-0.796767	0.859046	-0.507892	-0.829753	-0.341984	1.57423	-1.96359	NA	-1.48378	-1.97504	1.47745	NA	NA		0.499688	0.499255	0.499842
P51809	38231.1	42451.9	22696	20235.2	80367.6	46954.7	13608.4	21454.1	49167.5	16603.9	33.0487	24585.5	2878.88	64.7831	39.0535	15156.7	7505.13	129.424	396.629	3352.45	3276.64	11093.9		2.83925	2.70337	1.70477	1.38848	3.0153	3.07788	0.588902	2.09249	2.66228	1.0588	-8.07497	2.16522	-0.218869	-3.72446	-4.44926	0.830909	-0.314865	-5.12673	-2.39952	-0.546564	-1.95742	-0.739944		0.158993	0.0156469	0.0425423
P51858	278661	753614	402725	421318	572693	543738	601205	657715	382363	555349	637713	365999	398908	449996	290594	502616	526213	534534	238090	328238	6.8657e+06	5.92421e+06		-0.452842	0.247164	-0.438451	-0.365644	-0.124526	0.128418	-0.206508	0.273595	-0.218377	-0.101121	-0.094458	-0.0718531	0.531148	0.850858	0.382409	-0.451325	-0.357198	0.450769	-0.174874	-0.214207	1.58462	1.0652		0.499688	0.499255	0.499842
P51991	480049	739331	713253	639481	883711	732500	784337	766780	654460	750933	938632	791709	451886	501420	431944	858497	906843	562326	531879	631547	2.30822e+06	2.75107e+06		-0.193515	-0.369622	-0.163309	-0.320028	-0.0477396	-0.00734799	-0.383296	-0.085504	0.0320342	-0.21582	-0.110501	0.496711	0.138397	0.388344	0.368682	-0.227686	-0.113157	-0.0703523	0.4269	0.184415	0.187296	0.163122		0.499688	0.499255	0.499842
P52209	957071	717213	397241	451410	408198	382828	1.15884e+06	868926	328449	857797	1.2974e+06	612279	237359	217679	246702	1.07134e+06	1.46291e+06	557819	236078	332066	1.28222e+06	2.06212e+06		1.17762	-0.0185635	-0.654979	-0.460504	-0.827532	-0.58865	0.572636	0.495607	-0.648363	0.344696	0.770025	0.497034	-0.437003	-0.412292	-0.0504654	0.477607	0.965304	0.322849	-0.377195	-0.393095	-0.137253	0.265421		0.499688	0.499255	0.499842
P52272	597226	1.53727e+06	1.20199e+06	1.13969e+06	1.50753e+06	1.16973e+06	1.55696e+06	1.29018e+06	1.1991e+06	1.39017e+06	1.84996e+06	1.20527e+06	686650	846764	660420	2.07914e+06	1.75323e+06	1.11049e+06	672174	1.04075e+06	3.39688e+06	3.80249e+06		-0.652976	-0.108263	-0.197468	-0.287044	-0.0569311	-0.131336	-0.177778	-0.138918	0.183264	-0.102195	0.0516672	0.288039	-0.0646779	0.255831	0.128838	0.282475	0.0751299	0.0744169	-0.064473	0.1066	0.129554	0.0451484		0.499688	0.499255	0.499842
P52292	695990	1.02057e+06	882548	984822	1.54541e+06	681317	1.42485e+06	895122	1.24571e+06	985117	1.09369e+06	997019	624828	324380	305128	1.20575e+06	1.12426e+06	830562	439112	912392	1.23241e+07	5.36625e+06		0.0865629	-0.203059	-0.143872	0.0123526	0.492166	-0.420668	0.205354	-0.167839	0.742497	-0.101559	-0.211843	0.523804	0.311484	-0.643426	-0.498367	-0.015699	-0.075315	0.164528	-0.180668	0.42748	1.2819	-0.212742		0.499688	0.499255	0.499842
P52429	178780	0	16126.7	29561.6	3848.67	0	156386	0	40594.6	24779.9	0	13748.8	14595.3	0	0	20903.9	21197	2730.08	389.335	44623.6	NA	NA		4.75717	NA	0.482268	1.39429	-2.25558	NA	3.6519	NA	1.81115	0.989537	NA	0.702736	1.61507	NA	NA	0.630143	0.598752	-1.25867	-3.22081	2.78852	NA	NA		0.00518761	NA	0.499842
P52434	256708	175469	196037	136498	253643	190538	201581	192957	334160	149346	218923	154960	68741	73928.8	175805	274915	219283	103789	229611	97763.3	236469	179681		0.720238	-0.388257	-0.155901	-0.639056	-0.0579525	-0.0173269	-0.436766	-0.105493	0.729744	-0.738133	-0.207592	-0.0468539	-0.676333	-0.115191	1.19326	0.0741953	-0.258812	-0.463744	1.30049	-0.582278	0.880709	0.114552		0.499688	0.499255	0.499842
P52565	132977	209328	172457	148012	287232	172509	176207	142499	99845.1	110337	193180	79804.9	84320.9	16664.9	27915.4	129965	157819	60139.7	27043.8	58311	1.37107e+06	1.30025e+06		0.645777	0.766476	0.590687	0.393883	1.08312	0.753125	0.282089	0.355295	-0.0980832	-0.270726	0.508926	-0.102769	0.537605	-1.51033	-0.687476	-0.132487	0.158297	-0.411661	-1.00661	-0.455284	-0.132868	-0.545145		0.499688	0.499255	0.499842
P52569	1804.92	0	0	0	1639.92	0	331.348	1182.19	1290.8	3413.97	9784.93	137290	2148.6	1021.89	1044.74	9027.27	5122.13	3241.99	1708.21	1035.49	NA	NA		-1.12066	NA	NA	NA	-1.88251	NA	-4.05709	-1.23485	-1.96798	-0.295222	1.43333	5.63257	0.213749	0.323346	0.289706	1.08596	0.0409412	0.60734	0.764545	-1.54211	NA	NA		0.490806	NA	NA
P52597	1.66557e+06	2.73832e+06	3.06282e+06	2.47444e+06	2.69984e+06	2.14917e+06	3.13627e+06	2.05994e+06	3.1658e+06	2.77589e+06	2.85529e+06	2.9413e+06	1.44072e+06	1.82478e+06	1.52089e+06	3.9347e+06	3.29066e+06	2.07023e+06	1.94049e+06	2.02627e+06	8.78833e+06	1.06335e+07		-0.191585	-0.287101	0.149979	-0.209039	-0.218877	-0.284735	-0.207128	-0.492682	0.681724	-0.117831	-0.374815	0.514468	-0.0565603	0.235093	0.272492	0.194459	-0.0105808	-0.107187	0.433433	-0.00435734	0.29723	0.37551		0.499688	0.499255	0.499842
P52701	68113.3	135833	176375	1.63599e+06	285877	139529	292872	150465	204746	142020	361974	112972	29749.2	11998.2	17168.6	310337	358001	114393	24179.7	82595.6	43912.8	121449		-0.6334	-0.160633	0.252201	3.63288	0.659896	0.112364	0.70511	0.133187	0.554712	-0.215245	1.14198	0.0627055	-1.31075	-2.1042	-1.59783	0.853909	1.07557	0.339109	-1.39985	-0.201347	-1.54753	-0.442352		0.499688	0.499255	0.499842
P52732	7.60548e+06	1.49937e+07	1.37575e+07	9.77022e+06	1.08077e+07	1.34875e+07	1.63237e+07	1.41439e+07	1.19206e+07	1.07646e+07	1.84882e+07	1.3008e+07	8.0839e+06	1.17575e+07	1.08741e+07	1.49689e+07	1.29827e+07	1.27516e+07	1.0625e+07	1.06669e+07	1.54502e+07	1.82783e+07		-0.42697	-0.0946805	0.0292282	-0.561171	-0.459092	0.0510169	-0.164641	-0.00252931	0.48356	-0.447851	0.0110917	0.219721	-0.0503574	0.30622	0.67173	-0.168759	-0.293478	0.0648109	0.451215	-0.0575107	-0.445282	-0.252556		0.499688	0.499255	0.499842
P52788	NA	NA	NA	NA	NA	NA	NA	NA	NA	NA	NA	NA	NA	NA	NA	NA	NA	NA	NA	NA	10225.9	22756.2		NA	NA	NA	NA	NA	NA	NA	NA	NA	NA	NA	NA	NA	NA	NA	NA	NA	NA	NA	NA	-0.680334	-0.0308817		NA	NA	NA
P52815	5335.38	88018.3	65406.6	154235	37470.4	30067	29249.9	37393.7	59378.3	37156.6	20468.7	9450.96	5800.35	3986.53	7891.54	29072.6	31553.4	30740.5	12428.6	13569.2	124701	154674		-2.01038	1.53219	0.951575	2.38905	-0.273708	0.17715	-0.490344	0.455546	0.896791	0.0489772	-0.854393	-1.34978	-1.32959	-0.96816	-0.0633784	-0.436483	-0.315535	0.865066	0.163088	-0.473774	0.148446	-0.121212		0.223349	0.254245	0.342557
P52888	19724.5	62644.1	77217.8	78219.4	115239	62314.9	85261.4	71289.5	87923.8	87109.7	96262.7	14928.5	15302.4	5412.72	11926.8	83724.1	97195.8	14256.1	2951.33	4146.47	16940.5	4618.49		-0.678945	0.413804	0.556612	0.737674	0.713191	0.629174	0.446445	0.83064	0.803739	0.668005	0.825303	-1.31869	-0.490344	-1.1071	0.0292247	0.48433	0.707076	-0.89497	-2.49962	-1.8597	0.762969	-1.78443		0.499688	0.499255	0.499842
P52907	386915	625631	488656	914060	529769	471001	605052	493277	301768	534621	688936	355067	150713	131278	120324	647350	652749	248537	196700	252002	2.17651e+07	1.19141e+07		0.35919	0.264713	0.153465	1.09146	0.0691337	0.216145	0.109404	0.14052	-0.247172	0.155765	0.313256	0.184791	-0.614786	-0.713363	-0.645658	0.231261	0.274672	-0.399571	-0.169139	-0.303	1.7902	0.604584		0.499688	0.499255	0.499842
P52926	NA	NA	NA	NA	NA	NA	NA	NA	NA	NA	NA	NA	NA	NA	NA	NA	NA	NA	NA	NA	0	0		NA	NA	NA	NA	NA	NA	NA	NA	NA	NA	NA	NA	NA	NA	NA	NA	NA	NA	NA	NA	NA	NA		NA	NA	NA
P52948	NA	NA	NA	NA	NA	NA	NA	NA	NA	NA	NA	NA	NA	NA	NA	NA	NA	NA	NA	NA	2843.17	36764.8		NA	NA	NA	NA	NA	NA	NA	NA	NA	NA	NA	NA	NA	NA	NA	NA	NA	NA	NA	NA	-0.842313	1.587		NA	NA	NA
P53004	NA	NA	NA	NA	NA	NA	NA	NA	NA	NA	NA	NA	NA	NA	NA	NA	NA	NA	NA	NA	388520	71701.6		NA	NA	NA	NA	NA	NA	NA	NA	NA	NA	NA	NA	NA	NA	NA	NA	NA	NA	NA	NA	3.87312	0.522642		NA	NA	NA
P53007	220417	29958.1	48189.7	71379.3	83488.7	40604.7	124092	42033	121881	182307	31613.8	28403.8	92013.6	9036.85	5217.74	96756.2	93034.8	14859.5	5082.78	47556.9	128124	491061		2.62851	-0.92705	-0.266706	0.409634	0.191686	-0.23678	0.874679	-0.252207	1.19978	1.61439	-1.02514	-0.527875	1.88601	-0.812476	-1.73815	0.570339	0.524162	-1.1308	-2.15228	0.526906	-0.873092	0.619233		0.194047	0.459119	0.499842
P53041	10941.7	12645.5	13746.1	4140.56	17461.4	11041	4765.59	6016.69	21093	12277.2	15406	2011.17	2653.99	2034.23	3459.01	13693.3	13087	7289.9	4366.66	2819.48	145178	164492		0.828771	0.463193	0.426722	-1.25182	0.299185	0.471308	-1.42616	-0.368449	1.0683	0.162327	0.537703	-1.89191	-0.676104	-0.110225	0.69044	0.200325	0.134096	0.52425	0.609364	-1.08085	-0.119195	-0.537544		0.499688	0.499255	0.499842
P53396	432066	734095	765170	604047	943239	680225	840393	629877	448775	611733	851803	275062	215961	171404	233140	654270	877299	333193	422802	279169	1.25372e+06	1.42461e+06		0.10372	0.125508	0.429758	0.0822501	0.527968	0.37601	0.204016	0.126399	-0.0746313	-0.0489125	0.253481	-0.584064	-0.468147	-0.658315	-0.0251022	-0.146678	0.313943	-0.334358	0.599272	-0.541834	-0.419121	-0.533275		0.499688	0.499255	0.499842
P53597	NA	NA	NA	NA	NA	NA	NA	NA	NA	NA	NA	NA	NA	NA	NA	NA	NA	NA	NA	NA	4176.6	7109.44		NA	NA	NA	NA	NA	NA	NA	NA	NA	NA	NA	NA	NA	NA	NA	NA	NA	NA	NA	NA	-0.575119	-0.345909		NA	NA	NA
P53618	426814	166000	254407	183936	253880	203885	416736	195041	160009	258103	243881	98580.1	205787	136188	81147.6	288733	347644	166276	65242.6	290847	140241	156278		1.30448	-0.644179	0.0809884	-0.358235	-0.197902	-0.0784791	0.482337	-0.255927	-0.504642	-0.087935	-0.216203	-0.875799	0.787085	0.578729	-0.153188	-0.0200386	0.257897	0.0454189	-0.758332	0.864379	-0.271704	-0.4526		0.496409	0.499255	0.499842
P53621	930388	221426	350118	202907	292326	167614	463545	227928	284285	321500	307618	260792	431578	128817	132407	396177	395464	255709	136359	375720	413630	708490		1.9489	-0.789258	0.0528673	-0.751449	-0.466343	-0.894822	0.118127	-0.550381	-0.0766849	-0.269412	-0.418821	0.079893	1.36511	-0.144617	-0.00865928	-0.0873066	-0.0815439	0.107768	-0.224384	0.703891	0.0709111	0.54192		0.357914	0.499255	0.499842
P53634	NA	NA	NA	NA	NA	NA	NA	NA	NA	NA	NA	NA	NA	NA	NA	NA	NA	NA	NA	NA	2204.66	8040.41		NA	NA	NA	NA	NA	NA	NA	NA	NA	NA	NA	NA	NA	NA	NA	NA	NA	NA	NA	NA	-0.198363	0.148745		NA	NA	NA
P53985	48666.9	75727.7	71661.1	63587.1	138633	79367.7	112025	94815.8	93097.4	114638	121993	140005	37184.8	13454	47071.5	175369	98512.6	80104.7	34975	58661.5	112427	79474.1		-0.491651	-0.408128	-0.511281	-0.611497	0.127298	-0.10649	-0.125261	0.0846647	-0.0408201	0.0736527	0.132803	0.987339	-0.33754	-1.16502	0.613443	0.610486	-0.236025	0.487123	-0.176267	-0.0448868	0.0202013	-0.970043		0.499688	0.499255	0.499842
P53992	10787.4	49890.4	58759.4	43981.5	81147.5	44803	52303.2	34911.3	59235.8	54847.9	77965	39506	17838.9	16552.7	31543.5	62580.9	116637	29312.7	35249.7	26935.1	139462	118026		-1.77831	-0.117882	0.0160973	-0.274065	0.113111	-0.0296923	-0.401748	-0.457207	0.123653	-0.153362	0.343683	-0.00467613	-0.473568	0.303881	1.13305	-0.0756511	0.857128	-0.0195864	0.863577	-0.247786	1.14892	0.336648		0.291788	0.499255	0.499842
P53999	703928	1.56051e+06	1.19197e+06	1.06458e+06	1.54508e+06	1.08669e+06	1.44158e+06	1.05605e+06	764537	1.15558e+06	1.32789e+06	536673	522224	488398	491074	902129	909723	891259	573631	564965	1.41882e+06	1.86243e+06		0.0552171	0.405554	0.270025	0.105304	0.45506	0.246718	0.192447	0.0548634	-0.0534211	0.0986547	0.065748	-0.416561	0.0206418	-0.00701202	0.213146	-0.48338	-0.434154	0.270911	0.200514	-0.312255	-0.359167	-0.231981		0.499688	0.499255	0.499842
P54105	3.1274e+06	6.69485e+06	4.76246e+06	4.96042e+06	4.8265e+06	5.21155e+06	6.27219e+06	6.3103e+06	4.99079e+06	4.59536e+06	9.5512e+06	6.05858e+06	4.53574e+06	4.93351e+06	4.78219e+06	6.38744e+06	6.5554e+06	5.90505e+06	4.58714e+06	4.80122e+06	2.32918e+07	1.96341e+07		-0.527145	-0.13782	-0.388534	-0.397518	-0.522334	-0.184094	-0.405746	-0.0288546	0.271189	-0.559524	0.203707	0.306863	0.344472	0.332608	0.692211	-0.275998	-0.162455	0.167016	0.439784	-0.0132591	0.417785	0.0421591		0.499688	0.499255	0.499842
P54136	203584	152983	182767	131948	202621	128020	205661	184977	137924	212815	217294	66560.3	61343.1	25259.4	34470.4	329048	337851	179051	60139.9	101297	954260	774323		0.83923	-0.144153	0.238667	-0.218556	0.127174	-0.130874	0.0717848	0.303049	-0.0505593	0.267043	0.2417	-0.811059	-0.376132	-1.34122	-0.818973	0.808124	0.849649	0.766473	-0.261304	-0.0755164	0.159336	-0.483563		0.499688	0.499255	0.499842
P54577	28840.1	48754	51685.2	30234.4	57621.2	41028.9	52246.4	44038.5	50150.9	96206.8	53515.3	43306	12877.7	10272.6	28817.5	55111.6	79877.7	24230.2	29377.8	38030.7	399681	292829		-0.263754	-0.0703739	-0.0330398	-0.737095	-0.231927	-0.0884623	-0.281566	-0.0494834	0.00874304	0.794514	-0.110869	0.231621	-0.905942	-0.481189	0.942837	-0.13674	0.42752	-0.268421	0.593455	0.328561	0.605521	-0.366696		0.499688	0.499255	0.499842
P54578	130505	91116	59425.1	55804	127751	88421.7	83748.4	62038.9	77000.1	59397.9	87907.5	26257.8	17332.8	10021.1	15912.6	81066.6	77754.4	27718.3	11807.8	17300.4	118352	147965		1.70627	0.589652	-0.0844469	-0.0919794	0.699608	0.78064	0.155824	0.184482	0.385071	-0.188956	0.361335	-0.782464	-0.740878	-0.824354	-0.238038	0.174481	0.124665	-0.350615	-1.04752	-1.12248	-0.96589	-1.1307		0.400663	0.499255	0.499842
P54652	0	0	0	0	0	0	0	0	0	0	0	0	0	0	0	0	0	0	0	0	0	0		NA	NA	NA	NA	NA	NA	NA	NA	NA	NA	NA	NA	NA	NA	NA	NA	NA	NA	NA	NA	NA	NA		NA	NA	NA
P54709	140729	257439	460287	920990	408173	278238	353207	212005	689167	231894	255219	353447	156321	82435.2	61394.1	281435	186724	151355	66020.8	201891	219033	364139		-0.490258	-0.17295	0.834176	1.881	0.398902	0.238504	0.0916822	-0.279182	1.59253	-0.3843	-0.312527	0.899111	0.231304	-0.40604	-0.763916	-0.21456	-0.819842	-0.285604	-0.919009	0.160076	-1.07954	-0.653124		0.499688	0.499255	0.403404
P54727	227597	273696	156858	285809	218616	127283	348396	192114	206937	238717	412457	184003	57650.1	127986	67093.9	520584	505995	351176	62428.1	133210	419725	538996		0.467332	0.170478	-0.524894	0.387639	-0.290115	-0.679744	0.316348	-0.180679	0.0343666	-0.0987078	0.649926	0.16844	-1.0081	0.50807	-0.380904	0.947558	0.909041	1.21739	-0.753128	-0.211622	-0.344266	-0.302007		0.499688	0.499255	0.499842
P54886	51306.9	108104	85043.4	95413.3	120887	83711.2	169068	95771.7	105820	96407.2	136936	73904.4	33731.1	21904.8	18591.3	144309	150612	59486.1	26923.3	57393.4	385424	546259		-0.344966	0.213074	-0.111049	0.125645	0.107162	0.067952	0.605389	0.173153	0.295985	-0.0765289	0.410528	0.149733	-0.41257	-0.519869	-0.779934	0.429867	0.501376	0.0686047	-0.53557	-0.036346	-0.252716	-0.130688		0.499688	0.499255	0.499842
P55010	17611.5	41054.3	29201.3	30151.2	48106.2	19817	29891.5	19423	28446.3	21024.5	48289.2	26161.8	8435.38	4725.92	12630.1	46207.8	39446.5	16972.1	15882.4	17180.2	160118	385635		-0.129324	0.515727	-0.0918355	0.0897973	0.270091	-0.319706	-0.303464	-0.407851	-0.0355994	-0.650774	0.557944	0.310505	-0.66762	-0.654628	0.676968	0.403442	0.176354	0.0869592	0.589149	0.00745049	-1.03634	-0.285466		0.499688	0.499255	0.499842
P55011	13457.5	117287	109749	83272	67752.2	95876.5	149753	202508	173010	147480	182618	282743	41153.2	60130.1	42537.3	242577	253101	114448	140710	120299	7883.5	33400.9		-2.91042	-0.275781	-0.421796	-0.740482	-1.49883	-0.337715	-0.225126	0.707933	0.341421	-0.0804405	0.204724	1.51176	-0.690208	0.628906	0.00516695	0.558278	0.633632	0.52753	1.40953	0.528606	-1.83803	-0.196911		0.0509032	0.499255	0.499842
P55036	1.47064e+06	1.10866e+06	1.18798e+06	1.55285e+06	1.27557e+06	1.22783e+06	1.12205e+06	1.44592e+06	1.33087e+06	1.15037e+06	1.05068e+06	754757	797725	695251	597465	1.03573e+06	1.07064e+06	901571	1.11373e+06	834068	5.05289e+06	10902486		0.786408	-0.495638	-0.115025	0.261422	-0.20166	0.0358398	-0.573459	0.12649	0.473743	-0.284497	-0.703819	-0.326948	0.244798	0.0177736	0.0577074	-0.652401	-0.551118	-0.161752	0.774508	-0.13958	-0.841908	0.065591		0.499688	0.499255	0.499842
P55060	893508	646373	1.02928e+06	1.0218e+06	1.20576e+06	676027	1.02469e+06	764547	1.22674e+06	899013	947797	448510	675775	250453	605169	1.49042e+06	1.35582e+06	850581	380580	905923	1.0065e+06	1.10913e+06		0.451179	-0.832258	0.113793	0.109248	0.143292	-0.393467	-0.255529	-0.353163	0.685822	-0.221451	-0.356877	-0.614709	0.470173	-0.890265	0.615487	0.323326	0.212098	0.287374	-0.331292	0.452422	0.0865569	-0.0611478		0.499688	0.497436	0.499842
P55061	26679.2	0.133109	5007.8	10389.3	1573.7	208.623	67505.5	1108.51	7287.36	102260	1022.09	6183.75	4859.63	15.7888	9497.37	2.21876e+06	16971.3	1959.41	60328.8	8489.83	NA	NA		3.20181	-13.9759	0.973123	1.57283	-1.53595	-3.69685	4.41042	-0.913144	1.01307	5.24473	-1.57716	1.21451	1.80262	-5.57066	3.96147	9.78522	2.23343	0.233116	6.5248	1.96601	NA	NA		0.102268	1.77e-66	0.329851
P55072	2.64534e+07	1.45778e+07	3.30826e+07	2.62241e+07	3.08487e+07	3.20874e+07	3.97859e+07	4.61972e+07	4.43211e+07	2.43521e+07	2.06445e+07	1.543e+07	1.73556e+07	8.58916e+06	1.19966e+07	7.62141e+06	4.98695e+06	1.09667e+07	2.90994e+06	4.06534e+06	4.77679e+06	7.30556e+06		0.92996	-0.6481	0.82292	0.397879	0.583579	0.833918	0.653675	1.25129	1.90976	0.253367	-0.333842	-0.0244169	0.596471	-0.636607	0.326227	-1.68585	-2.233	-0.651122	-1.96852	-1.98895	-0.351777	0.20968		0.499688	0.499255	0.404422
P55081	11443.7	32758.8	29078	31769.1	25167.2	29364.4	20400.7	28119.1	18699.7	24713.1	36503.7	61309.4	41254.3	23309.1	10697.1	22945.7	24187	25999.7	12169	34684.7	53746.5	83697.3		-0.938074	-0.00491605	-0.345135	-0.0435538	-0.980392	0.0634499	-1.12313	-0.021819	-0.931909	-0.649215	-0.0710668	1.34172	1.53037	1.60908	0.381055	-0.882227	-0.806115	0.548926	0.120012	0.833753	0.271664	0.321615		0.499688	0.499255	0.499842
P55084	86264.7	101351	78523.6	105389	97697.4	99057.7	83108.1	101404	110543	96406.6	84865.6	102083	42293	35793.2	60752.5	83010.6	107232	42924.6	50617.2	41852.6	58132.7	85551.3		0.427797	0.0794826	-0.350407	0.181544	-0.386367	0.284192	-0.530246	0.252811	0.245214	-0.141572	-0.364018	0.568442	-0.0752805	0.439299	1.11523	-0.466719	-0.0737399	-0.35583	0.464894	-0.46732	-0.0797095	-0.0149874		0.499688	0.499255	0.499842
P55196	NA	NA	NA	NA	NA	NA	NA	NA	NA	NA	NA	NA	NA	NA	NA	NA	NA	NA	NA	NA	24349.5	26507		NA	NA	NA	NA	NA	NA	NA	NA	NA	NA	NA	NA	NA	NA	NA	NA	NA	NA	NA	NA	1.04939	0.553738		NA	NA	NA
P55209	1.63224e+06	4.25349e+06	3.21305e+06	3.04739e+06	3.52261e+06	2.88343e+06	3.91992e+06	2.84812e+06	1.87424e+06	2.99961e+06	4.9875e+06	3.16163e+06	1.61625e+06	1.417e+06	1.26836e+06	4.43378e+06	4.11416e+06	1.9625e+06	1.39085e+06	2.24731e+06	7.32644e+06	8.30918e+06		-0.32195	0.271482	0.123802	0.00176054	0.0805564	0.0540986	0.0254961	-0.108172	-0.190237	-0.099937	0.35651	0.52068	0.0128074	-0.24599	-0.0983397	0.275125	0.225442	-0.287575	-0.162168	0.0480188	0.0496233	0.0349093		0.499688	0.499255	0.499842
P55263	NA	NA	NA	NA	NA	NA	NA	NA	NA	NA	NA	NA	NA	NA	NA	NA	NA	NA	NA	NA	0	0		NA	NA	NA	NA	NA	NA	NA	NA	NA	NA	NA	NA	NA	NA	NA	NA	NA	NA	NA	NA	NA	NA		NA	NA	NA
P55327	NA	NA	NA	NA	NA	NA	NA	NA	NA	NA	NA	NA	NA	NA	NA	NA	NA	NA	NA	NA	4918.73	39473		NA	NA	NA	NA	NA	NA	NA	NA	NA	NA	NA	NA	NA	NA	NA	NA	NA	NA	NA	NA	-1.82514	-0.236743		NA	NA	NA
P55735	83456.1	99936	106524	86962.2	123491	90312.4	183113	96697.9	88276.7	108281	144778	83928.7	90365.6	23076.5	37881.6	154361	137855	69423.4	49610.8	109004	332845	819630		0.0329568	-0.250401	-0.12447	-0.360469	-0.210873	-0.166247	0.376554	-0.158871	-0.32247	-0.25067	0.146473	-0.00873524	0.707366	-0.783638	-0.0645814	0.183114	0.0229535	-0.045791	0.0291126	0.572847	0.390441	1.33192		0.499688	0.499255	0.499842
P55786	20518.6	45320.6	52207.4	54678.9	116147	58701.7	81456.6	33207.5	44432.8	36224.2	99629.5	20950.4	12840.3	4828.12	3484.96	53290.2	113286	24229	5117.79	8245.28	127920	162379		-0.216904	0.345122	0.449204	0.656627	1.25651	0.978443	0.865825	0.0738574	0.304802	-0.162552	1.31564	-0.340638	-0.357863	-0.928386	-1.54412	0.293579	1.42276	0.301823	-1.40558	-1.40265	-0.462773	-0.669486		0.499688	0.499255	0.499842
P55795	899926	1.46922e+06	1.46389e+06	943074	1.28653e+06	1.16453e+06	1.39408e+06	1.32279e+06	780190	1.0318e+06	1.73618e+06	1.31564e+06	754845	1.03228e+06	750203	1.66823e+06	1.53651e+06	1.09124e+06	730218	1.00337e+06	0	0		0.0177388	-0.114493	0.159947	-0.510697	-0.234392	-0.0759636	-0.282594	-0.0392646	-0.408615	-0.490382	0.0238446	0.491278	0.142351	0.632724	0.392009	0.0161587	-0.0624998	0.119259	0.124867	0.118243	NA	NA		0.499688	0.499255	0.499842
P55809	NA	NA	NA	NA	NA	NA	NA	NA	NA	NA	NA	NA	NA	NA	NA	NA	NA	NA	NA	NA	5683.38	1461.75		NA	NA	NA	NA	NA	NA	NA	NA	NA	NA	NA	NA	NA	NA	NA	NA	NA	NA	NA	NA	0.00897219	-1.69799		NA	NA	NA
P55884	444988	930466	851680	634139	930423	675113	926572	740427	507756	577065	874693	499201	252799	304928	314921	943367	919110	501016	283423	382081	1.30858e+06	2.08861e+06		-0.0758819	0.209062	0.334877	-0.0977747	0.26237	0.106309	0.0985612	0.0987298	-0.115941	-0.374841	0.0219323	0.0461225	-0.4907	-0.108617	0.13823	0.146568	0.139475	-0.00353991	-0.272339	-0.328905	-0.999467	-0.591748		0.499688	0.499255	0.499842
P56182	9244.71	41677.6	69622.2	46871.5	78533.3	68420.1	75769.5	75568	96829.4	50534.4	59462.2	62383.2	32380.1	8642.75	16562.5	54146.4	60954	30474.4	18464.1	21197.1	39075.8	25534.6		-2.02647	-0.414903	0.206964	-0.218952	-0.0122946	0.564803	0.0878224	0.668243	0.785453	-0.331038	-0.103984	0.620681	0.395024	-0.649046	0.210883	-0.34878	-0.174204	0.0177961	-0.077735	-0.646593	0.457427	-0.768072		0.219735	0.499255	0.499842
P56192	1.33584e+06	2.0069e+06	2.14629e+06	2.04283e+06	1.87855e+06	3.29106e+06	2.97181e+06	2.38683e+06	1.03693e+06	2.6063e+06	2.32888e+06	1.17623e+06	1.25297e+06	2.03244e+06	576528	2.83919e+06	1.23351e+06	717823	497197	941932	219127	378716		0.0824617	-0.132465	0.227908	0.159934	-0.173327	0.980009	0.350857	0.355467	-0.529621	0.388171	-0.00732681	-0.162549	0.407629	1.21997	-0.451258	0.30411	-0.90273	-0.956315	-0.922177	-0.468663	-0.508276	0.0212699		0.499688	0.499255	0.499842
P56270	78777.8	72476.1	71641.6	90377.6	108037	51211.9	42778.3	39381.9	52765.1	29019.3	22530.8	22834.8	26019.6	9960.75	10361.4	37082.8	43005.9	18846.7	29662.9	65254.9	99567.4	114865		1.29652	0.552441	0.4207	0.91095	0.646753	0.283589	-0.590498	-0.162453	0.0610472	-0.989342	-1.39061	-0.708528	0.204586	-0.329544	-0.398689	-0.743644	-0.517849	-0.559973	0.728679	1.18272	0.53953	0.18407		0.496409	0.499255	0.499842
P56537	95360.9	339409	382295	273570	507159	454259	643884	434843	218666	606635	815055	225700	73513.9	101007	200676	666224	725913	256908	193317	174061	464650	528951		-1.45946	-0.177931	0.1634	-0.328785	0.334073	0.567071	0.585882	0.389288	-0.482856	0.655757	1.00847	-0.153738	-1.28914	-0.532615	0.586948	0.664196	0.801029	0.0920086	0.272358	-0.462323	0.146102	0.00937017		0.377009	0.499255	0.499842
P57088	53667.6	10103.3	8976.17	11111.5	13265.3	17860.6	163543	16871	23239.7	2.7671e+06	36398	13170.6	6272.42	7903.93	3773.66	82293.9	26663.9	22252.6	6956.51	4666.63	63797.4	1.2402e+06		1.51912	-1.59462	-1.93817	-1.45497	-1.78925	-0.521327	2.12538	-0.61283	-0.462972	6.52306	0.0841933	-0.793632	-1.11067	0.162803	-0.987489	1.16932	-0.508023	0.475841	-0.527882	-2.00087	0.627977	4.43104		0.445859	0.22341	0.0384261
P57678	3192.7	4156.85	6405.97	10136.1	3977.39	2263.47	3558.29	1729.52	7632.07	3755.95	4745.63	4987.81	2501.51	67.1034	146.674	7945.65	100904	879.508	800.303	6597.46	NA	NA		-0.190009	0.287556	1.0034	1.27256	-0.437571	-0.398319	-0.343633	-0.555489	0.812829	-0.0535597	0.422711	0.652217	0.524675	-3.69591	-2.59471	0.977196	4.62549	-1.27582	-0.296584	1.34085	NA	NA		0.499688	0.499255	0.313705
P57679	NA	NA	NA	NA	NA	NA	NA	NA	NA	NA	NA	NA	NA	NA	NA	NA	NA	NA	NA	NA	0	0		NA	NA	NA	NA	NA	NA	NA	NA	NA	NA	NA	NA	NA	NA	NA	NA	NA	NA	NA	NA	NA	NA		NA	NA	NA
P57721	NA	NA	NA	NA	NA	NA	NA	NA	NA	NA	NA	NA	NA	NA	NA	NA	NA	NA	NA	NA	0	0		NA	NA	NA	NA	NA	NA	NA	NA	NA	NA	NA	NA	NA	NA	NA	NA	NA	NA	NA	NA	NA	NA		NA	NA	NA
P57740	16665	0	11083.9	10907.4	34330.3	14695	40217.8	1212.36	21527.3	14089.9	12749.3	14865.5	4815.16	2104.32	1990.64	14132.1	25636.7	4006.94	1798.57	13540.9	0	188181		1.02515	NA	-0.22278	-0.21815	0.95325	0.546398	1.40898	-2.02091	0.718432	0.0049837	-0.0660649	0.703951	-0.180981	-0.385138	-0.432325	-0.0962255	0.763273	-0.753814	-0.997914	0.848637	NA	2.23006		0.499688	NA	0.499842
P58107	34076.8	104254	107371	88525.8	154966	101552	136976	154308	117028	152433	164459	127321	117019	83745.8	90790.9	189725	159221	132376	120050	105259	134025	173944		-1.61987	-0.505193	-0.423576	-0.646212	-0.179864	-0.307473	-0.369551	0.21794	-0.212846	-0.0582332	0.019573	0.297605	0.77286	0.797681	0.907693	0.173609	-0.0797512	0.588417	1.01938	0.198131	-0.460753	-0.463503		0.345998	0.499255	0.499842
P58546	382.952	86758	43023.7	87232.9	80066.2	23967.9	30878.5	21931.7	50529.8	80747.2	23265.7	5203.76	1575.72	186.273	6922.6	49933.8	50721.2	4256.95	2862.19	7759.4	NA	NA		-5.30265	2.29742	1.07225	2.24277	1.51445	0.567209	0.292091	0.50166	1.31397	1.924	0.0888705	-1.57116	-2.55295	-4.78715	0.676342	1.07522	1.09612	-1.35808	-1.09127	-0.652986	NA	NA		2.36e-05	0.0521996	0.270048
P59190	NA	NA	NA	NA	NA	NA	NA	NA	NA	NA	NA	NA	NA	NA	NA	NA	NA	NA	NA	NA	0	0		NA	NA	NA	NA	NA	NA	NA	NA	NA	NA	NA	NA	NA	NA	NA	NA	NA	NA	NA	NA	NA	NA		NA	NA	NA
P60033	33346	0	271778	36471.3	353221	0	0	0	7024.84	0	0	193143	37881.4	0	0	11417.2	39894.8	0	0	0	439047	131600		-0.264863	NA	2.28618	-0.674279	2.3241	NA	NA	NA	-3.17536	NA	NA	2.29857	0.496064	NA	NA	-1.68314	0.230649	NA	NA	NA	1.42282	-0.914053		0.499688	NA	0.00313078
P60174	1.34308e+06	4.19569e+06	2.92237e+06	4.67689e+06	5.51811e+06	2.90413e+06	3.76914e+06	3.15461e+06	3.63026e+06	3.25277e+06	3.8441e+06	1.19454e+06	531805	617298	912784	5.60398e+06	5.22157e+06	1.85262e+06	956080	1.14003e+06	3.52601e+06	6.35337e+06		-0.404333	0.446484	0.180967	0.843198	0.94265	0.266386	0.17169	0.242368	0.972314	0.218811	0.171175	-0.715779	-1.42823	-1.2585	-0.378268	0.820237	0.7741	-0.162986	-0.512659	-0.748609	-0.773569	-0.111114		0.499688	0.499255	0.499842
P60228	8623.19	41305.9	23372.9	37718.8	29888.7	21732.7	47133.1	43986.7	24282.6	24331.6	26455.5	3035.94	789.717	549.454	961.009	22687.5	40304.3	4616.51	2345.29	2223.84	92897.5	228386		0.00646237	1.71631	0.700506	1.56493	0.616326	0.980318	1.48223	2.04431	0.800593	0.687109	0.826342	-1.76958	-2.97771	-2.5839	-1.77689	0.457717	1.31483	-0.651033	-0.894255	-1.90375	-0.961515	-0.233891		0.499688	0.193073	0.467271
P60468	183135	166949	325249	165352	165821	161031	268683	216544	196628	188990	117232	207939	328216	66349.5	49612.3	248813	150569	85527.7	79913.6	210002	42262.8	100788		0.327687	-0.353155	0.697798	-0.249654	-0.593472	-0.162356	0.09538	0.173803	0.0382451	-0.281528	-1.02918	0.493511	1.75757	-0.14944	-0.570123	0.0329651	-0.710102	-0.634588	-0.15433	0.666712	-1.65217	-0.724139		0.499688	0.499255	0.469397
P60604	8.19783e+06	282316	277510	381769	476933	166613	245352	147636	202340	632153	217580	83339.5	88428.9	67512.2	74903.5	522109	226793	135002	113710	156347	NA	NA		5.55027	-0.133913	-0.00331172	0.487705	0.557069	-0.620386	-0.544782	-0.91706	-0.304334	1.03928	-0.649556	-1.34808	-0.711796	-0.816108	-0.568632	0.623895	-0.626299	-0.555744	-0.203143	-0.312592	NA	NA		0.000838287	0.499255	0.499842
P60660	1.09927e+07	1.19024e+07	9.34636e+06	2.89619e+07	4.3109e+06	7.89679e+06	6.98808e+06	8.29186e+06	2.88775e+06	1.00826e+07	1.8961e+07	7.64307e+06	2.23974e+06	3.16804e+06	2.13928e+06	1.55395e+07	1.50526e+07	8.7139e+06	4.49388e+06	4.88534e+06	5.25046e+08	1.39162e+08		0.904021	0.360609	0.25341	1.85364	-1.01979	0.0472078	-0.632189	-0.0039841	-0.811603	0.256913	0.846553	0.213885	-1.18521	-0.88432	-0.971521	0.689925	0.733296	0.276563	-0.0509646	-0.436223	2.20713	0.187353		0.499688	0.499255	0.499842
P60709	1.57956e+07	2.06845e+07	1.96174e+07	3.17674e+07	1.94479e+07	1.69362e+07	2.02214e+07	1.90886e+07	9.7018e+06	1.46532e+07	2.66277e+07	1.04035e+07	5.94696e+06	6.00349e+06	6.01555e+06	2.7679e+07	2.36851e+07	1.15619e+07	6.33963e+06	8.97557e+06	1.45844e+09	6.71771e+08		0.428312	0.260921	0.437295	1.07649	0.349781	0.215561	0.0115902	0.271245	0.105913	-0.0758664	0.44889	-0.301475	-0.779416	-1.02231	-0.487559	0.688517	0.564566	-0.303914	-0.566079	-0.518013	1.56705	0.41264		0.499688	0.499255	0.499842
P60842	1.04789e+06	2.65648e+06	2.04993e+06	1.75765e+06	2.59642e+06	1.85452e+06	2.67183e+06	2.08666e+06	1.23529e+06	1.71574e+06	2.42596e+06	680852	439359	433404	544141	2.67039e+06	2.86738e+06	941170	585458	804887	3.26385e+06	3.01552e+06		0.0361348	0.556857	0.449115	0.204594	0.605786	0.404377	0.474633	0.426516	0.0955228	0.0630212	0.300542	-0.717102	-0.882244	-0.909027	-0.317839	0.508074	0.66282	-0.331657	-0.423246	-0.430134	-0.188569	-0.551151		0.499688	0.499255	0.499842
P60866	841621	880236	781408	472950	776278	524474	765390	665378	632059	888449	845211	557616	405628	401859	331119	799066	844271	498492	412568	775371	401587	864940		0.677778	-0.0147851	0.0481536	-0.695386	-0.176487	-0.423099	-0.34827	-0.202501	0.0178618	0.0907167	-0.168766	0.0541759	0.0570548	0.203805	0.0876934	-0.262416	-0.157286	-0.145328	0.153524	0.565118	-0.986084	-0.151204		0.499688	0.499255	0.499842
P60891	49031.7	148562	139887	214061	183902	89384	117112	130671	148977	217429	102681	50731	38954.1	33989.9	6109.82	130229	139942	41106.2	14961	13390.9	209581	338252		-0.360648	0.722559	0.629771	1.33447	0.706349	0.196832	0.0776621	0.681849	0.802744	1.16058	0.0103854	-0.390748	-0.149334	0.282429	-2.33419	0.303649	0.421836	-0.398694	-1.3333	-2.13253	0.0201244	0.284612		0.499688	0.499255	0.499842
P60900	1.04147e+06	407670	357241	1.09042e+06	480994	254795	407299	330330	437386	318904	280040	150640	145235	86517.7	108522	284964	593357	189819	146238	288174	2.40886e+06	2.85194e+06		2.04184	-0.0454911	-0.0275346	1.62956	0.183753	-0.400365	-0.19645	-0.134524	0.522182	-0.368427	-0.703451	-0.816402	-0.377767	-0.933848	-0.456232	-0.706178	0.402198	-0.475216	-0.270488	0.185607	0.649886	0.580235		0.335972	0.499255	0.499842
P60953	73991.5	62727.4	65872.2	42439.1	65686.2	70371.5	37748.9	35084.7	18274.2	39961.2	17876.1	10258.2	7061.86	3717.31	1626.46	30510.8	36439.1	15022.4	7621.01	16225	47834.4	80145.9		2.038	1.1612	1.06977	0.58473	0.642494	1.56206	-0.0102255	0.509075	0.261013	0.26345	-0.9341	-1.12052	-0.895761	-0.922104	-2.21657	-0.260911	0.00139964	-0.0680541	-0.371242	-0.0996076	-0.247491	-0.0893507		0.336709	0.409579	0.270323
P61006	35519.5	8845.28	6039.79	10286.6	9035.06	7710.32	9852.84	7702.25	7688.53	8378.45	8770.72	4059.85	1745.26	2594.82	1752.44	6405.63	6573.59	4572.32	2744.21	2571.17	0	0		2.62387	0.217502	-0.435448	0.234604	-0.40116	0.233793	-0.0496664	0.414106	-0.252156	-0.122865	0.0687551	-0.672555	-1.12802	0.588918	0.0325898	-0.618252	-0.675889	0.02452	0.328614	-1.10287	NA	NA		0.194047	0.499255	0.499842
P61009	26931.2	33445.8	40648.9	149104	45878.7	25760	34334.3	18849	41103.2	27723.8	36988.5	15058.6	23026.9	5615.92	7350.09	32299.4	21014.1	11447.9	10973.7	14441.6	NA	NA		0.256138	-0.0503305	0.0840682	2.21205	-0.151942	-0.205694	-0.420686	-0.706548	0.177049	-0.554349	-0.125357	-0.831218	0.589591	-0.585746	-0.273049	-0.445504	-1.10006	-0.75592	-0.128853	-0.546877	NA	NA		0.499688	0.499255	0.499842
P61019	69634.4	6205.43	5821.23	63679.4	22181.5	5548.68	13867.6	11562.9	18946.4	32077.4	12708.3	4725.76	5451.65	3873.61	598.253	25452.3	46692.1	4595.41	2794.18	2949.46	248119	242641		3.08069	-1.14148	-1.40516	2.31248	0.141357	-1.08639	-0.373013	0.0125975	0.400027	1.06381	-0.302864	-1.14578	-0.140543	0.281885	-2.53075	0.594718	1.49877	-0.694073	-0.684932	-1.51506	0.343812	-0.300464		0.118503	0.415441	0.161165
P61026	508.847	25028.6	40235.5	37274.9	27939.4	20262.8	28014.1	9965.64	0	14242.7	23.4777	49.1172	0	0	90.5745	3110.99	4531.19	86.2629	830.398	884.065	0	12619.8		-1.89631	3.03869	3.84424	3.2722	2.56174	2.95566	2.82704	2.13599	NA	2.02117	-6.43764	-6.24783	NA	NA	-2.24068	-0.365315	0.0130043	-3.6478	-0.191369	-1.64278	NA	1.22952		0.256904	0.00461185	2.31e-08
P61077	23332.7	47298.4	155217	132891	81055.7	37435.6	59704.5	36062.9	29372.3	59903.8	51715.4	23391.9	3565.55	3244.87	3904.28	79216.6	44397.4	18434.5	6996.43	15701.3	11401.3	42751.7		-0.0220908	0.401455	2.03125	1.96095	0.668527	0.29671	0.365204	0.194785	-0.356288	0.553384	0.318135	-0.207647	-2.26048	-1.48171	-1.31837	0.848697	-0.0134118	-0.10255	-0.899589	-0.463036	-2.95952	-1.58272		0.499688	0.499255	0.0117022
P61081	0	9702.07	1968.01	15989.3	16647.1	27654.4	16046	16699.2	6569.99	23304.7	21038.4	2985.13	439.557	1042.44	3430.89	14198.5	3539.06	1650.21	2050.58	3076.44	0	12198.6		NA	0.349523	-2.13794	0.930679	0.509879	2.12535	0.672023	1.53106	-0.453752	1.38704	1.3431	-1.09201	-3.15195	-0.791087	1.02752	0.55537	-1.58194	-1.4787	-0.134933	-0.783968	NA	-1.70516		NA	0.499255	0.0195479
P61106	68098.3	2227.21	17462.6	23555.2	33034.7	13863.7	11317.3	20748.5	1725.39	14180.5	5846.83	3213.89	892.002	5389.63	4607.94	36854.6	17792.2	8211.79	7610.91	10632.3	NA	NA		3.05087	-2.58237	0.37972	0.841546	0.813817	0.379406	-0.574058	1.12696	-3.17743	-0.0722316	-1.3192	-1.69662	-2.81826	0.958091	0.760941	1.26641	0.127977	0.232371	1.10103	0.392982	NA	NA		0.123065	0.0185261	0.499842
P61158	13049.4	44371.4	49291.5	24159.1	49923.7	45569	47501.8	35650.9	16869.4	33752.7	48078.9	9491.19	2165.76	2821.63	2926.24	45788.3	51613.2	7485.59	5021.49	9326.62	190306	201149		-0.18393	1.0064	1.01524	0.120357	0.631139	1.2861	0.714117	0.881143	-0.495889	0.390806	0.904822	-0.857847	-2.29879	-0.98012	-1.02578	0.723704	0.899612	-0.741964	-0.674863	-0.544277	0.0302826	-0.485188		0.499688	0.438476	0.304951
P61160	38198.1	63668.9	70972.3	50680.3	71218.4	70565.6	79186.2	71610.7	82762.8	44148.4	54252.3	45889.1	38973.7	32707.7	40971.1	40333.2	72263	23953.6	34109.8	25885.3	194787	134237		-0.196806	-0.0323847	0.0639916	-0.33189	-0.299144	0.363057	-0.0305962	0.321342	0.382931	-0.729734	-0.455727	-0.0429313	0.391298	0.930435	1.14459	-0.971519	-0.0923052	-0.62908	0.477003	-0.592218	0.883063	-0.196252		0.499688	0.499255	0.499842
P61163	56084.1	144069	136700	120202	169866	123329	230477	188446	133465	211541	222941	130751	75187.7	64532.1	48888.3	272932	240483	96432.7	64678.4	117648	849532	840449		-1.10019	-0.251782	-0.216082	-0.377578	-0.159158	-0.207718	0.220015	0.309501	-0.126263	0.236248	0.260103	0.170662	-0.0945431	0.0401958	-0.316531	0.509584	0.323228	-0.17179	-0.171645	0.127081	0.175956	-0.173106		0.496409	0.499255	0.499842
P61201	0	0	296.834	0	0	0	2298.86	0	1268.51	7478.98	58165.1	17905.4	5249.58	2518.35	10677.2	29665	33283.6	2074.18	9627.33	2600.34	39553.2	139796		NA	NA	-3.86655	NA	NA	NA	-2.12385	NA	-2.74603	0.856529	2.94467	1.76177	0.729612	0.622843	2.81009	1.76324	1.92764	-0.964734	2.23186	-0.829917	-1.50189	-0.215023		NA	NA	1.05e-06
P61204	609679	825924	796430	413912	990771	627644	993684	556133	363578	575356	567304	141106	144222	102367	99983.4	657143	619208	202095	90213.9	263407	17440.3	95697		0.888191	0.741947	0.844665	-0.120232	0.917689	0.639642	0.822405	0.346723	-0.146129	0.164757	0.0628002	-1.26644	-0.695985	-0.911706	-0.854896	0.236061	0.155365	-0.670962	-1.2678	-0.254235	-3.51303	-1.30998		0.499688	0.499255	0.397212
P61218	0	12566.5	15071.5	0	0	0	0	0	0	0	0	0	0	0	0	0	0	0	0	0	NA	NA		NA	-0.119418	0.119418	NA	NA	NA	NA	NA	NA	NA	NA	NA	NA	NA	NA	NA	NA	NA	NA	NA	NA	NA		NA	0.499255	0.499842
P61221	88403.1	45545	90519	79299.1	152277	82612.8	108345	65184	102185	33617	69363.6	51226.6	14684.9	3173.33	1720.3	21389.4	47623.9	9517.18	15525.9	11453	144165	325334		1.73203	0.135924	1.0662	0.995749	1.46209	1.26918	1.0853	0.856778	1.34132	-0.481329	0.5663	0.780565	-0.381081	-1.80294	-2.84405	-1.26925	-0.0687274	-1.31393	0.00839404	-1.13005	-0.254786	0.407075		0.394282	0.499255	0.272607
P61224	110321	81416.7	98271.8	117026	128754	55258.4	65527.8	79864.4	93416.3	50944.9	85789.8	54631.1	44655.9	13016.4	21370.8	121490	120056	30390.3	41758	33021.6	87124.5	154994		0.98287	-0.0494759	0.196376	0.539883	0.246067	-0.391348	-0.678764	0.0866797	0.204189	-0.887401	-0.145047	-0.16382	0.193176	-0.919597	-0.280425	0.307299	0.301936	-0.68952	0.355015	-0.635951	-0.473836	-0.108625		0.499688	0.499255	0.499842
P61244	21696.8	65350.4	112225	41927.3	76626.2	37793.1	103221	80066.8	105573	93777.6	93777	82476.4	73040.6	59865.1	16550.8	83410.9	62358.6	42923.8	31701.3	41007.4	478092	457810		-1.37534	-0.311723	0.466333	-0.91848	-0.448347	-0.893608	0.0659219	0.151471	0.457384	0.088344	0.0551611	0.514881	0.985611	1.38991	-0.61384	-0.182582	-0.603557	-0.119228	5.08e-05	-0.256476	1.64052	1.09449		0.402786	0.499255	0.499842
P61247	838696	1.46759e+06	1.51446e+06	883500	1.50956e+06	1.04328e+06	1.71182e+06	1.15464e+06	822081	1.33715e+06	1.64918e+06	830892	473945	512788	319153	1.58183e+06	1.13235e+06	863360	490210	725308	2.7291e+06	2.55716e+06		0.13346	0.108494	0.429918	-0.377315	0.227233	-0.0155767	0.249445	-0.017769	-0.109953	0.123216	0.172052	0.0249785	-0.327977	-0.184791	-0.657044	0.158216	-0.29542	-0.00341778	-0.244654	-0.142154	-0.25281	-0.609714		0.499688	0.499255	0.499842
P61254	93569.2	107271	115501	80394.3	118841	84866	129125	87938.5	128550	185034	189993	111053	74796.3	62083.5	49865.8	230089	202218	148517	74942	98030.5	1.26209e+06	1.8035e+06		-0.0428125	-0.392255	-0.172245	-0.679347	-0.397011	-0.467922	-0.346161	-0.528444	0.109345	0.332506	0.319326	0.222348	0.193686	0.284649	0.0121837	0.552117	0.361785	0.769623	0.345591	0.152626	0.198659	0.395829		0.499688	0.499255	0.499842
P61289	NA	NA	NA	NA	NA	NA	NA	NA	NA	NA	NA	NA	NA	NA	NA	NA	NA	NA	NA	NA	5686.04	2103.03		NA	NA	NA	NA	NA	NA	NA	NA	NA	NA	NA	NA	NA	NA	NA	NA	NA	NA	NA	NA	1.4581	-0.704275		NA	NA	NA
P61313	104014	383261	278662	234301	183356	167318	302305	189854	101443	311592	212637	77251.5	71390.7	58973.1	35422.8	408453	284377	103747	70873	115800	221161	686746		-0.372933	1.02314	0.641375	0.42537	-0.256378	0.0514166	0.428509	0.127542	-0.756154	0.616084	0.00286985	-0.814026	-0.364577	-0.247547	-0.965619	0.919299	0.38224	-0.235395	-0.213712	-0.0831108	-0.647597	0.697345		0.499688	0.43458	0.498446
P61353	254823	1.01017e+06	426406	354126	852924	747494	882582	767989	385561	1.1926e+06	824230	334220	205200	364843	316065	764040	789193	360094	376405	379158	655241	1.64566e+06		-0.762432	0.528378	-0.515025	-0.78798	0.301357	0.442121	0.201633	0.349152	-0.380072	0.866361	0.132083	-0.369436	-0.618782	0.398909	0.35689	0.00884811	0.0801591	-0.290913	0.355471	-0.161245	-1.0127	0.0504952		0.499688	0.499255	0.499842
P61513	180641	431151	281055	421283	384713	333472	450469	346112	262709	637412	311897	216957	112741	208467	233388	371513	440450	208675	283779	350767	449621	1.26908e+06		-0.485529	0.158474	-0.284636	0.315294	-0.0576064	0.10748	0.0582328	0.0476153	-0.163454	0.749387	-0.428317	-0.186291	-0.64927	0.510521	0.799921	-0.205762	0.0615514	-0.223122	0.833872	0.582896	-1.11503	0.102483		0.499688	0.499255	0.499842
P61604	271293	1.20283e+06	666032	743225	885030	579507	716443	796410	603446	794625	670241	180950	85465.4	124774	152454	528510	736396	381116	144895	214866	822303	2.69848e+06		-0.360252	1.10606	0.463318	0.628849	0.669075	0.379038	0.205927	0.72078	0.596533	0.573989	0.14176	-0.968361	-1.60669	-0.87447	-0.408937	-0.224852	0.290552	0.110992	-0.745907	-0.691087	-1.19779	0.260862		0.499688	0.427391	0.499842
P61619	18279.7	73980	36071.1	30137.3	32738.9	38892.2	59648.7	41131.1	22737.9	124456	21780.8	60443.3	48461.4	23695.7	10031.7	63453.1	61920.6	11188	8155.17	42447.3	NA	NA		-0.831537	0.6534	-0.547038	-0.675853	-1.08755	-0.0668361	-0.0358924	-0.0348885	-1.15087	1.25397	-1.39834	0.807886	1.20447	1.04079	-0.387242	0.118117	0.0858916	-1.29179	-1.14322	0.609192	NA	NA		0.499688	0.499255	0.499842
P61758	2932.76	2541.68	6397.29	27037	13705.4	9764.6	4771.66	7116.16	2296.22	7297.53	1711.59	5013.94	2115.62	0	0	11676.5	13581.9	1872.26	329.796	4094.43	81561.9	95369.9		-0.582978	-1.22793	0.0302942	2.14888	0.639235	2.02422	-0.717522	0.667581	-1.59062	0.0743579	-0.953522	0.11132	0.651882	NA	NA	0.679463	0.848674	-0.862791	-2.45003	1.11011	0.625713	0.261176		0.499688	0.37865	0.499842
P61927	3260.45	38926.5	34457.2	14061.8	58645.4	8750.74	14371.1	5600.31	6245.83	34415.6	10554	1514.62	377.764	243.236	150.866	33394.1	29456	1603.37	207.836	23564.3	480118	401070		-0.57848	2.5392	2.19902	0.963732	2.50293	0.527415	0.619083	-0.0652693	-0.343685	2.09698	0.380157	-1.91438	-2.14622	-1.83247	-2.52846	1.92944	1.74139	-1.32912	-3.50821	2.47413	0.948484	0.0777295		0.499688	0.0259776	0.00479151
P61956	16515	4093.78	56170.3	24694.7	33738.4	44310	154437	89203.2	87709.5	120850	131030	110699	44524.5	19895.3	29913.6	110905	106195	59643.6	31375.4	29778.1	2.11962e+06	2.36355e+06		-1.48663	-4.10411	-0.139148	-1.30685	-1.1822	-0.311639	1.04273	0.622071	0.616726	0.822541	0.904188	1.32889	0.552915	-0.195456	0.432091	0.599113	0.537786	0.58607	0.213523	-0.475977	-0.212453	-0.406796		0.371901	1.38e-05	0.499842
P61962	31977.8	77855.6	43756	52453.8	131324	106136	61140	33206	105563	43005.1	54488.8	77101.7	37305.1	11766.7	13449.3	52572.1	58278.5	68947.2	44436.1	41299.3	120570	100625		-0.485173	0.22576	-0.729788	-0.328031	0.52526	0.934822	-0.478962	-0.852719	0.675545	-0.826665	-0.503465	0.67772	0.301149	-0.54509	-0.476962	-0.644731	-0.482716	0.92908	0.874366	0.0703715	1.32218	0.498342		0.499688	0.499255	0.487612
P61964	627831	806737	552107	895275	522714	504648	409555	633981	464064	736909	517099	612847	570607	658645	817072	316225	335457	455925	736858	400334	NA	NA		0.367515	-0.0498008	-0.37001	0.364914	-0.664306	-0.384337	-1.18958	-0.180988	-0.327595	-0.0757719	-0.815055	0.303152	0.676462	1.03005	1.54237	-1.55769	-1.44166	-0.186561	1.12274	-0.319467	NA	NA		0.499688	0.499255	0.499842
P61970	NA	NA	NA	NA	NA	NA	NA	NA	NA	NA	NA	NA	NA	NA	NA	NA	NA	NA	NA	NA	25486.9	94493		NA	NA	NA	NA	NA	NA	NA	NA	NA	NA	NA	NA	NA	NA	NA	NA	NA	NA	NA	NA	-1.30754	0.155522		NA	NA	NA
P61978	1.79366e+06	6.53258e+06	4.9937e+06	4.25985e+06	5.46503e+06	4.07007e+06	4.89536e+06	5.38146e+06	4.4467e+06	4.81616e+06	7.00071e+06	5.69601e+06	3.82081e+06	3.36681e+06	3.7787e+06	7.5734e+06	6.40598e+06	4.11836e+06	3.69284e+06	3.34836e+06	1.71283e+07	1.93843e+07		-1.0807	0.089411	-0.0529575	-0.356708	-0.0755309	-0.284613	-0.50625	0.000337948	0.353751	-0.225341	0.00885123	0.489171	0.366576	0.0498346	0.617194	0.242374	0.0668151	-0.0934566	0.391598	-0.274309	-0.24454	-0.191239		0.496409	0.499255	0.499842
P61981	99832.7	276479	220954	208109	267178	153294	278563	198418	197608	207571	248198	139273	96568.3	53462.1	57585.4	269246	261008	170259	108303	108438	291723	465122		-0.525054	0.443729	0.209583	0.158321	0.220752	-0.167347	0.217914	0.103405	0.156412	-0.076996	0.141495	-0.0238374	-0.00515707	-0.498024	-0.34156	0.208628	0.163854	0.403355	0.321327	-0.273156	-0.298883	0.0582597		0.499688	0.499255	0.499842
P62081	127566	401108	335033	165291	351135	187600	309619	294608	169536	542936	355674	135848	49988.1	93998.9	101260	497667	494844	217871	89843.5	230865	1.9374e+06	2.27171e+06		-0.562652	0.479053	0.411516	-0.642854	0.243832	-0.316163	-0.0664633	0.239089	-0.371606	0.948811	0.19706	-0.443998	-1.42645	-0.250736	-0.0129759	0.661678	0.668138	0.272175	-0.448031	0.393674	-0.235595	-0.32362		0.499688	0.499255	0.499842
P62136	0	14682	19123.4	1748.67	668.596	8881.13	8666.34	17849	356.753	20809.7	5246.71	2147.67	2281.1	0	664.559	11121.5	11708.9	2744.74	7041.09	3507.32	259138	123016		NA	1.31093	1.55991	-1.96448	-2.91315	0.766862	0.0892568	1.92377	-4.41663	1.56056	-0.421812	-1.20248	-0.315063	NA	-0.0688391	0.517747	0.570416	-0.338154	2.00196	-0.184816	1.16872	-0.541662		NA	0.344044	0.0708677
P62140	176755	133093	140835	167486	129606	158140	128585	168813	152503	157345	132711	120134	101787	105846	116721	169788	155672	62376.5	138409	116307	2.35473e+06	694710		0.606292	-0.374068	-0.171778	0.113571	-0.560314	0.160785	-0.64963	0.144305	0.0762495	-0.204936	-0.514587	0.0447725	0.354573	0.767734	0.972946	-0.198973	-0.325858	-0.825069	0.956117	0.107363	1.55509	-0.593057		0.499688	0.499255	0.499842
P62158	883043	2.05079e+06	1.67412e+06	2.67466e+06	1.68625e+06	1.25336e+06	1.84079e+06	1.92306e+06	969627	1.23515e+06	2.4359e+06	685006	413613	261081	229013	1.62587e+06	1.54284e+06	765355	503127	595009	5.21907e+07	2.20132e+07		0.115571	0.509591	0.484821	1.15672	0.304584	0.154631	0.249833	0.639656	0.102202	-0.0891984	0.633968	-0.387309	-0.647461	-1.36141	-1.28429	0.108677	0.0842004	-0.322203	-0.32145	-0.558	2.0564	0.539518		0.499688	0.499255	0.499842
P62191	8.90822e+06	6.38526e+06	9.60836e+06	7.43332e+06	6.34863e+06	4.70113e+06	2.78927e+06	3.71554e+06	6.47797e+06	3.32575e+06	2.54698e+06	3.37564e+06	3.17117e+06	1.98745e+06	4.19213e+06	1.39313e+06	1.63649e+06	1.57228e+06	2.69292e+06	1.69523e+06	1.22655e+06	1.1895e+06		1.70955	0.354078	1.23936	0.833019	0.431512	0.276603	-0.976392	-0.225484	1.08048	-0.46069	-1.14422	0.141695	0.538916	-0.184121	1.1969	-1.96646	-1.67376	-1.09483	0.329943	-0.844182	0.802492	0.523374		0.400663	0.499255	0.17078
P62195	229096	150016	163868	95948.6	191743	132627	213103	203052	318743	141699	65570.1	108710	40111.1	15245.8	74674.5	182309	202183	32098.2	68282.9	200330	4.10302e+06	2.7961e+06		1.12577	-0.0605535	0.186477	-0.581017	0.154345	0.0326367	0.235611	0.552736	1.30328	-0.227488	-1.429	0.028804	-0.897198	-1.97714	0.444406	0.0410812	0.197094	-1.67764	0.0401973	1.0507	2.15997	1.25675		0.499688	0.499255	0.499842
P62241	878380	2.29474e+06	1.6235e+06	1.52621e+06	2.27149e+06	1.644e+06	2.67147e+06	1.98719e+06	1.36043e+06	2.75933e+06	2.97672e+06	1.42723e+06	606034	773416	525465	2.50892e+06	2.98771e+06	1.65848e+06	800837	1.35498e+06	9.67887e+06	8.39886e+06		-0.502525	0.0697227	-0.16893	-0.289739	0.141599	-0.0513244	0.192604	0.0798963	0.0096016	0.498611	0.321073	0.0901438	-0.692773	-0.366872	-0.662263	0.146905	0.462015	0.213075	-0.241704	0.05126	0.521559	0.0830839		0.499688	0.499255	0.499842
P62244	337686	367035	349979	152509	332420	243751	301337	342605	170744	419116	289358	85352	48706.2	116721	116070	359288	424070	109993	143253	140621	87324	785598		0.930188	0.469938	0.544488	-0.677618	0.212372	0.158938	-0.0272336	0.552194	-0.362015	0.614497	-0.00932202	-1.09609	-1.38608	0.224994	0.2993	0.265589	0.51779	-0.644854	0.349875	-0.261061	-2.81795	0.120605		0.499688	0.499255	0.499842
P62249	848565	749795	825881	625795	783644	566788	860258	592445	743378	1.01231e+06	653580	754286	354904	250859	234087	1.00679e+06	916452	467182	345611	769544	963921	1.87078e+06		0.74383	-0.229877	0.163739	-0.24281	-0.122551	-0.277075	-0.1392	-0.3511	0.310063	0.328789	-0.527495	0.537424	-0.10963	-0.495256	-0.411409	0.116389	0.00395043	-0.220008	-0.0912419	0.586966	-0.50378	0.18604		0.499688	0.499255	0.499842
P62258	366362	939580	713650	807190	905064	546902	695287	599152	524958	916173	686677	314244	275426	219128	200712	654571	572563	322844	269889	272701	3.64914e+06	2.89082e+06		-0.123368	0.490353	0.330251	0.519589	0.475196	0.053808	-0.0722742	0.0501262	0.175004	0.563496	-0.069407	-0.381344	-0.102869	-0.310199	-0.255064	-0.140462	-0.312545	-0.384989	-0.0743436	-0.572629	0.649774	0.00570942		0.499688	0.499255	0.499842
P62263	839014	1.07411e+06	1.30016e+06	1.02994e+06	1.19659e+06	1.03579e+06	1.28134e+06	882188	760390	946511	1.06413e+06	469876	406408	445753	372947	1.17537e+06	1.14137e+06	485946	566260	767543	1.07319e+06	2.66935e+06		0.377009	-0.0851273	0.462771	0.120308	0.137617	0.239455	0.0803749	-0.147928	-0.00226483	-0.135884	-0.197461	-0.54958	-0.288223	-0.0719383	-0.128069	-0.0266782	-0.0347055	-0.564019	0.247164	0.207204	-0.746066	0.329707		0.499688	0.499255	0.499842
P62266	681340	1.23396e+06	880152	771872	1.06987e+06	792675	1.19762e+06	1.12118e+06	645606	1.28804e+06	1.22533e+06	678672	306647	424177	351033	1.40516e+06	1.36373e+06	527273	460006	545862	1.74684e+06	2.66594e+06		0.135077	0.19259	-0.0476213	-0.238214	0.0406073	-0.0879799	0.0497125	0.279967	-0.179025	0.391664	0.0846693	0.0684923	-0.636651	-0.0695677	-0.144332	0.308728	0.298987	-0.369342	0.00996874	-0.22975	-0.0432747	0.303954		0.499688	0.499255	0.499842
P62269	900907	1.34316e+06	1.04197e+06	877671	1.28783e+06	1.58973e+06	924621	962845	1.05462e+06	1.21711e+06	908466	1.00937e+06	573834	687973	757907	947950	787956	1.09305e+06	727208	916733	1.15525e+06	2.49714e+06		0.231311	-0.01779	-0.126674	-0.380838	-0.0113746	0.614475	-0.664975	-0.282392	0.238378	-0.0190561	-0.702056	0.323119	-0.0378217	0.288582	0.651403	-0.605552	-0.841437	0.368249	0.351886	0.210453	-0.624906	0.249787		0.499688	0.499255	0.499842
P62273	572109	730317	516842	273271	521469	253834	289967	259125	242083	428945	468609	161630	168448	267873	255866	361130	250609	256698	294334	269450	131594	839266		1.07109	0.828307	0.477235	-0.464794	0.240416	-0.433301	-0.735572	-0.51542	-0.467445	0.00508587	0.0507468	-0.785724	-0.190174	0.785124	0.814328	-0.381313	-0.915873	-0.0433762	0.763586	0.0532945	-1.38362	1.04335		0.499688	0.497436	0.499842
P62277	528842	1.28183e+06	1.06435e+06	860164	927229	934410	515740	668775	436633	769380	643341	478152	272438	271592	298960	762771	626521	396863	478943	367649	559010	618345		0.100446	0.691995	0.643539	0.326298	0.215279	0.575194	-0.800344	-0.0490245	-0.414705	0.000172781	-0.429635	-0.0436223	-0.397955	-0.213858	0.0853526	-0.196257	-0.469151	-0.339719	0.526395	-0.408027	-0.065058	-0.229713		0.499688	0.499255	0.498446
P62280	969508	1.5633e+06	1.27221e+06	794173	1.31364e+06	1.08215e+06	1.22182e+06	1.061e+06	939228	1.6451e+06	1.27949e+06	1.07122e+06	510470	779619	591907	1.11115e+06	1.15971e+06	790952	611995	630397	976113	1.74561e+06		0.287127	0.163157	0.122147	-0.575598	-0.0310723	-0.00442157	-0.298399	-0.183206	0.00862035	0.379491	-0.234733	0.366732	-0.258142	0.442811	0.245448	-0.418076	-0.317511	-0.152167	0.0516864	-0.394033	-0.380445	0.207174		0.499688	0.499255	0.499842
P62304	149297	365236	188706	239958	259829	163027	172550	124662	149250	160543	143975	63596.5	14540.6	5517.97	19935.8	256385	146074	42867.9	24361.5	104348	NA	NA		0.829061	1.62051	0.651667	1.08191	0.820928	0.64056	0.208717	0.141821	0.378153	0.256531	0.05852	-0.511237	-2.11929	-3.0236	-1.10805	0.868134	0.0274494	-0.851393	-1.11959	0.434542	NA	NA		0.499688	0.22341	0.494098
P62306	644980	791053	875136	502282	1.00576e+06	691144	881983	674675	720877	594819	750153	364230	402816	358191	255525	929607	963169	653920	385118	546569	1.05356e+06	979446		0.553838	0.139397	0.51499	-0.312267	0.497004	0.290012	0.160863	0.129033	0.489804	-0.222655	-0.036311	-0.287065	0.347041	0.366861	0.017262	0.260917	0.332833	0.567782	0.36795	0.344974	0.664404	0.239476		0.499688	0.499255	0.499842
P62308	142189	217139	228813	145298	227648	172398	154347	231682	340867	246131	144712	132748	57584.2	43398.7	28946.1	291507	75246.5	48010.4	69639.1	56031.8	NA	NA		0.486368	0.575029	0.706949	0.0838834	0.402124	0.472457	-0.207	0.814346	1.39529	0.646229	-0.190301	0.354665	-0.307339	-0.240648	-0.845132	0.806347	-1.23198	-0.97244	0.178148	-0.779117	NA	NA		0.499688	0.499255	0.464298
P62310	NA	NA	NA	NA	NA	NA	NA	NA	NA	NA	NA	NA	NA	NA	NA	NA	NA	NA	NA	NA	16733.5	8361.81		NA	NA	NA	NA	NA	NA	NA	NA	NA	NA	NA	NA	NA	NA	NA	NA	NA	NA	NA	NA	0.349768	-1.44265		NA	NA	NA
P62314	13855.3	406799	236155	271194	341476	241381	373474	270025	237818	451467	346313	139840	114099	130365	172658	563020	618408	211049	209361	155141	293556	799277		-3.98017	0.441158	-0.203973	0.00767532	0.0947975	-0.0242445	0.124906	0.0297953	-0.00903602	0.565455	0.0845381	-0.516796	-0.285767	0.196782	0.712752	0.763214	0.911929	0.148976	0.740474	-0.284131	-1.32789	-0.167237		0.00304689	0.499255	0.499842
P62318	588885	1.07445e+06	853620	711379	900219	742028	1.00821e+06	891132	853877	674126	874608	467252	333564	448651	366592	1.16222e+06	931854	642847	424963	595619	1.29281e+06	2.15518e+06		0.10955	0.201804	0.113602	-0.151287	-0.0131364	0.0232728	-0.00137111	0.152781	0.425454	-0.371327	-0.198514	-0.27567	-0.302075	0.254403	0.147427	0.231549	-0.0674188	0.148599	0.110693	0.106748	-0.200764	0.267686		0.499688	0.499255	0.499842
P62333	134254	101671	120852	110348	117918	109248	121737	145918	275250	109072	85390.2	57042.4	55028.9	73616	30909.2	162077	224387	53804.3	61110.3	82891.4	765218	1.31086e+06		0.562215	-0.402993	-0.115317	-0.184675	-0.458431	-0.0613588	-0.409207	0.275134	1.19078	-0.418099	-0.817296	-0.761702	-0.208688	0.765173	-0.54478	0.0774252	0.569534	-0.602682	0.161482	-0.0124802	2.05231	2.45336		0.499688	0.499255	0.499842
P62424	152048	274040	224872	180912	375715	166933	352539	245622	256838	914084	409371	188769	48316.7	73001.4	69520.1	511832	440810	174906	86958.7	161532	1.0855e+06	2.45899e+06		-0.284266	-0.0316406	-0.149378	-0.471295	0.368243	-0.449284	0.164057	0.0119821	0.248462	1.7461	0.453895	0.0636088	-1.43878	-0.55716	-0.522185	0.74421	0.533297	-0.0100789	-0.446698	-0.099686	-0.166252	0.721616		0.499688	0.499255	0.499842
P62495	73280.4	100134	150679	65496	151299	88095.3	143929	87593.6	178963	349665	108480	20801.5	6494.66	3492.68	6558.08	62958.4	79364.6	22096.7	5767.39	37592.1	795337	532693		0.605948	0.50821	1.12134	-0.0481397	0.803385	0.547953	0.761125	0.456005	1.45626	2.24271	0.466978	-1.34141	-2.44588	-2.75869	-1.87324	-0.402071	-0.0469212	-0.960448	-2.38887	-0.232903	0.845088	-0.186076		0.499688	0.499255	0.236824
P62701	631722	2.0392e+06	1.52361e+06	1.40394e+06	1.64649e+06	1.36074e+06	1.70891e+06	1.35623e+06	1.04078e+06	1.5326e+06	1.14512e+06	687907	348239	451754	375481	1.6245e+06	1.69264e+06	753337	584756	588323	5.35328e+06	3.40701e+06		-0.32358	0.561035	0.40264	0.274261	0.320512	0.342783	0.210076	0.184617	0.208541	0.290107	-0.408953	-0.293881	-0.823892	-0.415473	-0.454942	0.161894	0.267403	-0.245894	-0.0200734	-0.490983	0.680339	-0.249984		0.499688	0.499255	0.499842
P62714	43415	43740.2	74766.5	34952.8	80166.5	57744.7	67035.3	69623.1	87868.9	64204.3	66031.1	18148	14909.1	8501.41	11091.9	106509	107836	33015.1	21841.5	27937.2	2.36989e+06	2.35885e+06		0.171947	-0.36478	0.474138	-0.593459	0.277714	0.286435	0.00165455	0.466364	0.797699	0.0888204	0.0952115	-1.16601	-0.860311	-1.18201	-0.792599	0.748068	0.773356	-0.0491506	-0.0867119	-0.344909	0.399988	0.00685269		0.499688	0.499255	0.499842
P62750	84678.3	158406	112845	61393.1	86900.3	39234.7	119015	93850.8	52434.7	305744	162382	120461	37740	63865.9	41412	224589	161417	146005	41805	49812.4	1.11686e+06	1.96043e+06		0.0908463	0.470732	0.0748894	-0.798043	-0.581341	-1.33355	-0.18529	-0.149388	-0.944146	1.36174	0.368336	0.625095	-0.541781	0.611087	0.0191831	0.79857	0.308889	1.02749	-0.239846	-0.572043	-0.59274	-0.0898571		0.499688	0.499255	0.499842
P62753	230461	646977	569202	500119	697648	557747	671082	561457	388779	1.21056e+06	624741	321390	144153	166399	205321	376132	728517	382539	166362	260521	1.96116e+06	2.3808e+06		-0.63238	0.156517	0.201737	0.0113396	0.286706	0.29452	0.0807634	0.173607	-0.0866846	1.17157	0.0100462	-0.14183	-0.856652	-0.471795	0.00725088	-0.758731	0.246392	0.0893668	-0.567092	-0.432183	0.214216	0.192738		0.499688	0.499255	0.499842
P62805	99730.6	44279.1	79461.5	77465.2	98408.3	74923.1	46782.4	50412.7	112717	239762	34617.5	61433.1	43364.8	39265.9	48571.3	38084	36779	35341.5	65643.5	715740	86503.5	176198		0.712429	-1.07544	-0.238425	-0.193248	-0.271815	-0.0584613	-1.29935	-0.718153	0.364704	1.29766	-1.61464	-0.108918	0.0290938	0.599847	0.8187	-1.53768	-1.57735	-0.585907	0.906822	3.81985	-0.24651	0.321543		0.499688	0.432341	0.499842
P62820	68047.8	30165.8	41247.7	50900.4	38760.6	17884.9	29250.5	25552.9	34819.9	32877.9	29078.9	8548.91	5401.95	5115.59	4031.58	28154.6	36372.3	8389.31	4716.82	10743.8	250640	212547		2.12707	0.2867	0.607524	1.08488	0.114009	-0.249851	-0.149561	0.238705	0.441307	0.208776	0.0125591	-1.15646	-1.08545	-0.243343	-0.701089	-0.142622	0.236297	-0.718165	-0.919154	-0.477265	0.647279	-0.193366		0.312881	0.499255	0.499842
P62826	676356	2.35121e+06	1.76725e+06	1.8618e+06	2.84121e+06	1.48206e+06	2.18815e+06	1.74316e+06	848732	1.48997e+06	1.73658e+06	671769	388723	386431	276678	1.43361e+06	1.64278e+06	781729	488167	491334	2.236e+06	4.53466e+06		-0.244845	0.747596	0.599244	0.667419	1.10894	0.444458	0.552383	0.532554	-0.110689	0.224222	0.182237	-0.356928	-0.686908	-0.68375	-0.940063	-0.0475422	0.200897	-0.222101	-0.315952	-0.785713	-0.888352	-0.0901566		0.499688	0.499255	0.499842
P62829	156086	129323	140017	87642.5	145739	160891	221236	161158	123157	250430	123738	158332	94137	37366.5	46718.8	161626	212157	68156.9	95499.6	118974	775695	1.2891e+06		0.539817	-0.285892	-0.0701072	-0.728281	-0.282757	0.304272	0.274729	0.193782	-0.14969	0.601795	-0.493832	0.566044	0.356694	-0.627788	-0.250802	-0.15061	0.255581	-0.557086	0.535181	0.265142	0.299495	0.717386		0.499688	0.499255	0.499842
P62841	230094	982113	678906	404607	666664	456028	683721	624344	289621	1.01368e+06	721910	349623	173971	276730	241992	1.11866e+06	889096	377126	220506	396622	291088	1.02902e+06		-0.733257	0.721433	0.391918	-0.380585	0.136423	-0.0721501	0.0373747	0.272726	-0.619827	0.820315	0.165452	-0.0964461	-0.646328	0.24942	0.19618	0.791619	0.467835	0.00699263	-0.200937	0.123645	-1.53512	0.0247271		0.499688	0.499255	0.499842
P62847	145841	311691	335030	113643	383824	183213	296648	219787	205834	265627	307029	159629	62060.9	61873.8	72805.3	466279	279264	184823	99904.3	192605	6.72415e+06	5.59641e+06		-0.157915	0.298022	0.611686	-1.00063	0.578678	-0.153403	0.0684224	-0.000232442	0.12442	0.0885872	0.17416	-0.000253061	-0.906085	-0.682837	-0.308418	0.763057	0.0161925	0.224394	-0.0949668	0.322836	0.888193	0.291497		0.499688	0.499255	0.499842
P62851	999019	1.5103e+06	1.39085e+06	1.08546e+06	1.70924e+06	1.31455e+06	2.03548e+06	1.33496e+06	1.00611e+06	1.82507e+06	2.02819e+06	1.32004e+06	775664	435337	275099	1.54688e+06	1.82832e+06	880562	485285	847537	3.63881e+06	4.1232e+06		0.179087	-0.0674071	0.0864904	-0.291861	0.196501	0.109537	0.288283	-0.0208828	-0.0135795	0.36962	0.25656	0.491441	0.184364	-0.663496	-1.10533	-0.0907939	0.203781	-0.20176	-0.481343	-0.131141	0.178777	0.111171		0.499688	0.499255	0.499842
P62854	58546.7	236892	112609	125255	230500	122426	170801	141264	191892	231531	193008	177291	79731.8	71335.2	109559	189001	145930	185455	104481	140365	586221	1.33574e+06		-1.13013	0.379997	-0.595395	-0.416256	0.210572	-0.314516	-0.321192	-0.21507	0.34265	0.278412	-0.0562315	0.535404	-0.102656	0.064275	0.772891	-0.136428	-0.51766	0.691642	0.43689	0.289653	-0.759728	0.135671		0.487788	0.499255	0.499842
P62857	94436.9	362426	250673	303050	239921	199034	168328	279218	228326	327251	120520	52449.8	58695.4	27346.6	38697.4	162089	186710	80770.8	47467.4	62827.1	8833.25	134816		-0.291081	1.15423	0.626641	0.976223	0.248276	0.495076	-0.265759	0.908558	0.567846	0.880556	-0.640257	-1.22598	-0.443878	-1.01385	-0.528306	-0.25853	-0.038696	-0.319608	-0.537871	-0.750791	-3.48163	0.160139		0.499688	0.411944	0.499842
P62861	109689	373014	261552	205831	393493	218625	401264	337563	198513	478861	493769	266717	104537	114579	92634.9	369351	414763	216061	131960	233645	1.3765e+06	1.45163e+06		-0.985272	0.20435	-0.142226	-0.49845	0.221039	-0.267226	0.137987	0.265435	-0.34606	0.568346	0.512017	0.36318	-0.509466	-0.112079	-0.316504	0.0392638	0.224016	0.0840526	-0.0473451	0.230601	0.479574	0.230604		0.499688	0.499255	0.499842
P62873	1.07344e+06	3.82821e+06	1.3456e+06	1.97641e+06	1.52032e+06	2.36739e+06	3.57947e+06	2.74977e+06	629754	1.93279e+06	3.10806e+06	2.48853e+06	2.54157e+06	3.43199e+06	1.66833e+06	2.90996e+06	2.35431e+06	3.07412e+06	1.79638e+06	2.0308e+06	230243	381883		-0.56643	0.487712	-0.801235	-0.226599	-0.820159	0.152953	0.293961	0.225862	-1.58998	-0.387037	0.0769297	0.612945	1.12263	1.63579	0.777024	0.00767342	-0.269936	0.857843	0.645431	0.339425	-0.335874	0.141345		0.499688	0.499255	0.44863
P62888	83746.1	253403	208017	175749	272560	256249	386643	232669	154399	301352	332969	116981	67605.2	107535	94548.4	320274	348157	105776	127651	172572	130203	405868		-0.953177	0.142487	-0.0428999	-0.260707	0.0914179	0.430849	0.540119	0.173846	-0.365521	0.312599	0.409319	-0.446233	-0.701994	0.359516	0.220299	0.299128	0.425005	-0.479191	0.393672	0.249184	-1.41185	-0.0546599		0.499688	0.499255	0.499842
P62891	NA	NA	NA	NA	NA	NA	NA	NA	NA	NA	NA	NA	NA	NA	NA	NA	NA	NA	NA	NA	49971.8	254592		NA	NA	NA	NA	NA	NA	NA	NA	NA	NA	NA	NA	NA	NA	NA	NA	NA	NA	NA	NA	-1.71845	0.380527		NA	NA	NA
P62899	765120	1.20432e+06	1.05494e+06	927072	988501	967896	1.14215e+06	864524	801992	1.31401e+06	1.07764e+06	1.36772e+06	677464	481470	511742	1.82707e+06	3.24824e+06	910868	615849	983947	2.98524e+06	4.26351e+06		-0.0268507	-0.210592	-0.132452	-0.331182	-0.426803	-0.152139	-0.377508	-0.473381	-0.167946	0.0729548	-0.487203	0.740639	0.178153	-0.308028	0.0179969	0.3485	1.24884	0.0489211	0.0690446	0.286158	-0.193851	0.0780859		0.499688	0.499255	0.499842
P62906	288533	524889	363894	299827	351542	190610	375987	231658	405658	473768	319310	303559	106059	200267	190328	290648	303955	195305	191676	329963	814792	1.17165e+06		0.263576	0.513073	0.155846	-0.133642	-0.137738	-0.666454	-0.153291	-0.490621	0.531669	0.361529	-0.333497	0.366151	-0.682637	0.515895	0.557039	-0.512779	-0.432926	-0.262571	0.310553	0.549493	-0.114236	0.098954		0.499688	0.499255	0.499842
P62913	1.5074e+06	2.43474e+06	2.13981e+06	1.99161e+06	2.38597e+06	2.27964e+06	3.01695e+06	2.32424e+06	1.56363e+06	2.2077e+06	2.52486e+06	1.29458e+06	2.46242e+06	1.52458e+06	1.25294e+06	2.19379e+06	2.29047e+06	1.49065e+06	1.47752e+06	2.13117e+06	3.30786e+06	3.47109e+06		-0.033346	-0.179092	-0.0941966	-0.226957	-0.122809	0.100111	0.0400336	-0.0227665	-0.128519	-0.169328	-0.257506	-0.385906	1.06139	0.316978	0.298773	-0.389603	-0.271545	-0.276117	0.336328	0.394546	0.0320425	-0.127753		0.499688	0.499255	0.499842
P62917	452117	581734	579719	404886	706668	468523	460394	501631	681332	1.03216e+06	677460	381538	167185	243663	199218	920447	869705	280641	324053	400573	1.57843e+06	1.4124e+06		0.138746	-0.228514	0.000454817	-0.531966	0.0762604	-0.19284	-0.708385	-0.221152	0.517138	0.704208	-0.0966389	-0.115852	-0.864419	-0.128925	-0.264337	0.344172	0.280946	-0.598791	0.198423	-0.0204047	0.516108	0.0397751		0.499688	0.499255	0.499842
P62937	3.88474e+06	1.41481e+07	8.00572e+06	9.93483e+06	1.27326e+07	9.78105e+06	1.34505e+07	1.16716e+07	4.58842e+06	9.56499e+06	1.41168e+07	3.44258e+06	2.72827e+06	2.61499e+06	2.51181e+06	9.14612e+06	1.36569e+07	5.10159e+06	3.42558e+06	4.68599e+06	1.51639e+07	1.5859e+07		-0.482242	0.716645	0.123395	0.371022	0.666405	0.487111	0.462304	0.62266	-0.0926102	0.271767	0.51973	-0.812849	-0.697776	-0.915123	-0.547807	-0.00289213	0.671471	-0.334146	-0.27548	-0.330279	-0.42664	-0.462918		0.499688	0.499255	0.499842
P62942	153749	553919	293673	380200	499864	289480	422553	449514	315610	326349	390634	138341	83035.4	72160.4	68651.6	393025	498838	151103	61819.6	97015.2	469432	808419		-0.398999	0.903784	0.121497	0.512421	0.662325	0.247917	0.310253	0.789826	0.410637	0.0833216	0.266075	-0.532592	-0.757061	-0.678737	-0.656657	0.230463	0.593859	-0.345577	-1.07193	-0.980785	-0.550134	-0.0710659		0.499688	0.465899	0.499842
P62979	2.27232e+08	4.70568e+06	3.16173e+06	1.2457e+07	4.1068e+06	3.03372e+06	2.0195e+07	5.39878e+06	3.80404e+06	2.54733e+07	7.19384e+06	1.3796e+07	4.64617e+06	2.33839e+06	2.99433e+06	4.84657e+07	6.17282e+06	1.41006e+07	2.86276e+06	1.23518e+07	3.46477e+07	1.80367e+07		5.20347	-1.27423	-1.613	0.350566	-1.36594	-1.61276	0.707894	-0.881273	-0.70739	1.37611	-0.841001	0.883579	-0.281012	-1.47131	-0.658657	2.12366	-0.861823	0.804553	-0.913884	0.741103	0.95868	-0.100586		0.00186076	0.353584	0.100425
P62993	23596	52994.7	57476.1	51791	65187.1	36202.2	48757.4	29814.8	21031.9	26926.9	26076.2	9316.45	6003.18	1361.03	5575.16	11296	12922.1	9456.53	18913.6	9606.53	167116	278258		0.669355	1.2416	1.20647	1.22137	0.984479	0.911017	0.714525	0.590082	-0.210037	0.0183342	-0.037457	-0.922093	-0.808627	-1.05721	-0.078301	-1.39563	-1.19851	-0.423825	1.28572	-0.535742	0.273993	0.427273		0.499688	0.378031	0.187277
P62995	114852	154388	134274	71447.2	129805	129033	103462	97359	72207.3	101628	181903	34930.4	67333.7	124822	71667.7	90420.5	91435.9	107113	129762	100383	101792	90438.7		0.337927	0.212656	0.00311954	-0.864087	-0.376598	0.175779	-0.673154	-0.323737	-0.840576	-0.537566	0.294486	-1.51258	0.0970618	1.64582	0.758911	-0.805721	-0.777934	0.457317	1.31185	0.295856	0.199005	-0.422443		0.499688	0.499255	0.499842
P63010	2354.43	6078.53	6848.71	4909.16	10153	6194.31	3570.2	4861.92	3291.92	4889.13	2859.63	3908.59	1099.14	84.0532	186.815	1207.62	1066.51	2267.67	185.654	2592.63	224516	156081		0.078521	1.18017	1.28405	0.657233	1.30543	1.43137	-0.0340512	1.24784	0.0143334	0.604623	-0.0745807	0.804982	-0.278307	-3.00065	-1.78085	-1.56765	-1.84756	0.504711	-2.16255	0.447501	0.968724	-0.169141		0.499688	0.404496	0.154305
P63092	214400	41367.7	120862	60225	187201	83291.1	69416.5	51992.2	135073	62166.9	66910	67708.2	64523.9	9799.88	9376.04	41694.6	38730.6	28062	25588.8	39389.4	NA	NA		2.29595	-0.781288	0.776201	-0.176075	1.06476	0.515262	-0.325295	-0.259204	1.02944	-0.320996	-0.241079	0.441081	1.05115	-0.997026	-1.18127	-1.02791	-1.1278	-0.506602	-0.0570225	-0.0748087	NA	NA		0.270817	0.499255	0.433996
P63104	665881	1.00155e+06	896280	627475	1.10195e+06	714251	1.06758e+06	767877	830854	864204	833987	470256	361545	205448	287230	538152	774081	370150	296299	417249	2.93378e+06	2.26023e+06		0.467974	0.264698	0.35623	-0.167972	0.459255	0.135794	0.254612	0.098914	0.560767	0.170925	-0.102671	-0.0970362	-0.0127608	-0.748202	-0.051737	-0.743219	-0.171081	-0.507339	-0.259906	-0.252475	0.38411	-0.29259		0.499688	0.499255	0.499842
P63151	663067	828625	701135	639878	968488	690969	867513	573846	705825	753472	802899	575254	496702	270488	264027	700581	762758	426293	396946	643402	1.40291e+06	1.69646e+06		0.414233	-0.016498	-0.0238815	-0.15611	0.242569	0.0760842	-0.0725962	-0.334363	0.272933	-0.0641316	-0.156767	0.189854	0.447533	-0.29868	-0.161311	-0.368792	-0.218612	-0.289779	0.183947	0.376776	0.601364	0.578337		0.499688	0.499255	0.499842
P63165	0	0	0	0	0	0	0	0	0	0	0	0	0	0	0	0	0	0	0	0	184023	302627		NA	NA	NA	NA	NA	NA	NA	NA	NA	NA	NA	NA	NA	NA	NA	NA	NA	NA	NA	NA	-0.482477	-0.0903899		NA	NA	NA
P63172	270588	139829	595722	125196	170065	109712	206025	154215	188361	149185	168257	212652	227304	74663.1	45653.9	187111	222478	144049	98765.9	195228	76607.5	57814.8		0.941501	-0.590185	1.60241	-0.653569	-0.56564	-0.714735	-0.284821	-0.30461	-0.0282853	-0.612391	-0.468514	0.538071	1.23912	0.109034	-0.634702	-0.369143	-0.103997	0.194131	0.208691	0.596413	-0.0432497	-0.854483		0.499688	0.499255	0.0612284
P63173	2870.97	21144.3	11174	3341.79	10966.5	2948.2	6562.84	3167.65	7848.01	16753	1935.78	3052.31	2645.53	923.706	2831.44	2167.5	2061.1	4455.46	2375.99	4357.27	NA	NA		-0.668155	2.25125	1.28922	-0.83167	0.603778	-0.48872	0.069384	-0.157708	0.41739	1.68393	-1.44665	-0.488024	0.157949	0.806548	1.43179	-1.49669	-1.72633	0.682759	0.850948	0.307349	NA	NA		0.499688	0.0582182	0.152639
P63208	18199.2	6561.45	35342.4	20709	57450.2	7386.08	11500	41683.9	17392.5	1548.16	32960	30654.6	10627.7	2336.82	899.205	7399.55	10720.6	3767.05	4857.28	9220.59	358040	632180		1.04316	-1.10671	1.23698	0.612146	1.54243	-0.69811	-0.683131	1.8523	0.254702	-3.4782	1.06808	1.60292	0.802657	-0.523005	-2.01772	-1.27313	-0.724279	-1.03438	0.0386568	0.155855	0.0086557	0.246172		0.499688	0.427391	0.171388
P63220	375182	800225	713341	446143	808480	552102	728760	559982	520952	489602	648882	408999	189208	164878	164620	707487	650426	507698	235191	254548	1.56112e+06	1.33962e+06		0.0449927	0.426183	0.490573	-0.205683	0.458836	0.232511	0.15644	0.123026	0.301177	-0.222607	0.0197679	0.169651	-0.498951	-0.531519	-0.368018	0.134223	0.0306027	0.463781	-0.0984924	-0.51363	0.00593277	-0.531917		0.499688	0.499255	0.499842
P63241	658422	1.86033e+06	1.15834e+06	908230	1.64026e+06	1.06022e+06	1.67951e+06	1.48327e+06	1.04258e+06	1.74213e+06	1.80855e+06	477935	265446	444209	315651	1.56138e+06	1.21824e+06	699014	280334	485049	2.11983e+06	3.26639e+06		-0.0776129	0.614409	0.182334	-0.182405	0.501432	0.160988	0.37345	0.508182	0.386878	0.667672	0.465068	-0.643103	-1.03683	-0.234389	-0.514758	0.289589	-0.0374788	-0.158947	-0.921422	-0.587478	-0.651344	-0.272566		0.499688	0.499255	0.499842
P63244	1.14061e+06	2.5187e+06	1.98763e+06	2.09351e+06	2.95936e+06	2.07929e+06	2.81431e+06	2.33302e+06	1.44726e+06	2.52108e+06	3.04606e+06	1.07504e+06	975069	1.02665e+06	908567	2.27857e+06	2.59112e+06	1.39529e+06	1.04297e+06	1.05861e+06	4.47359e+06	4.70146e+06		-0.272485	0.0472898	-0.0280919	0.0227753	0.373645	0.138963	0.112136	0.15864	-0.0665577	0.204013	0.197244	-0.487173	-0.141537	-0.0967622	-0.00405957	-0.157249	0.0880686	-0.19933	-0.00635696	-0.471288	0.0342365	-0.122803		0.499688	0.499255	0.499842
P67809	4.49634e+06	6.47455e+06	6.35325e+06	4.03675e+06	5.54847e+06	4.3915e+06	5.20686e+06	4.00145e+06	3.99599e+06	5.1884e+06	7.46435e+06	6.1342e+06	6.9847e+06	3.39337e+06	3.51944e+06	7.04675e+06	5.62967e+06	3.96519e+06	3.58839e+06	5.32627e+06	1.87215e+07	1.63029e+07		0.142596	-0.0730455	0.156791	-0.584003	-0.203119	-0.318828	-0.561276	-0.588434	0.0405703	-0.263427	-0.043021	0.45574	1.12209	-0.0760409	0.368239	-0.0133751	-0.274647	-0.29272	0.205403	0.273123	0.443468	0.101982		0.499688	0.499255	0.499842
P67812	0	380.793	293.007	13357.8	0	0	1889.67	395.933	320.055	0	0	0	0	0	0	0	0	0	0	0	18575.5	48630.7		NA	-1.08702	-1.5006	3.04561	NA	NA	-0.114222	-0.58572	-1.65759	NA	NA	NA	NA	NA	NA	NA	NA	NA	NA	NA	-0.0275859	0.839578		NA	0.432212	0.133253
P67870	445.173	19468.5	27518.8	11630.2	1259.22	3329.5	2013.75	1467.58	5151.71	10947.4	2314.53	808.637	883.863	2975.51	1049.47	64972.2	88951	22696.9	2063.78	26766.3	NA	NA		-3.72905	1.76011	2.23821	0.726108	-3.02633	-0.675856	-2.08946	-1.7082	-0.544188	0.65114	-1.56607	-2.80327	-1.83335	1.15563	-0.401154	3.2442	3.59194	2.77793	0.26557	2.73133	NA	NA		0.00574578	0.178981	0.00398245
P67936	9482.78	47646.7	13564.2	137557	5819.82	5207.16	7040.07	2014.07	9166.96	80337.8	3784.34	688.46	7878.81	3229.44	281.72	10472.6	5591.13	3213.13	536.582	3262.9	7.75444e+06	1.76412e+06		1.05831	2.85525	0.820318	4.39928	-0.906396	-0.223938	-0.424972	-1.59879	0.261958	3.38287	-1.13765	-3.05876	1.36874	0.985679	-2.64734	0.225561	-0.704583	-0.268026	-2.1252	-0.424498	4.14919	1.33861		0.499688	0.00909701	0.404524
P68032	7.38459e+06	2.07712e+07	1.09332e+07	1.11537e+07	1.24905e+07	1.15262e+07	1.69214e+07	1.63457e+07	3.56213e+06	1.5609e+07	2.65783e+07	3.81538e+06	4.25113e+06	5.6177e+06	3.38537e+06	2.19944e+07	2.19094e+07	1.04699e+07	2.82706e+06	6.35072e+06	NA	NA		0.010876	0.8632	0.152198	0.101876	0.215149	0.289547	0.362094	0.689269	-0.881399	0.574031	1.03012	-1.14022	-0.523277	-0.291135	-0.586625	0.87742	0.956042	0.26219	-1.04764	-0.351794	NA	NA		0.499688	0.484236	0.499842
P68036	NA	NA	NA	NA	NA	NA	NA	NA	NA	NA	NA	NA	NA	NA	NA	NA	NA	NA	NA	NA	168994	82321.8		NA	NA	NA	NA	NA	NA	NA	NA	NA	NA	NA	NA	NA	NA	NA	NA	NA	NA	NA	NA	0.135761	-1.51626		NA	NA	NA
P68104	1.36979e+07	2.48302e+07	2.7059e+07	1.82359e+07	2.8398e+07	2.36639e+07	3.75103e+07	2.58077e+07	1.60144e+07	2.2615e+07	3.02081e+07	1.35997e+07	1.02886e+07	1.08736e+07	7.91957e+06	3.32113e+07	3.80175e+07	2.36271e+07	1.25481e+07	2.02331e+07	NA	NA		-0.299222	-0.0252438	0.36319	-0.315584	0.337844	0.181495	0.385101	0.187397	0.293094	-0.00406809	0.0667371	-0.44529	-0.4708	-0.638116	-0.58285	0.372607	0.678705	0.234831	-0.0621457	0.162604	NA	NA		0.499688	0.499255	0.499842
P68133	NA	NA	NA	NA	NA	NA	NA	NA	NA	NA	NA	NA	NA	NA	NA	NA	NA	NA	NA	NA	1.98464e+08	1.27022e+08		NA	NA	NA	NA	NA	NA	NA	NA	NA	NA	NA	NA	NA	NA	NA	NA	NA	NA	NA	NA	1.31227	0.591643		NA	NA	NA
P68363	3.33306e+07	2.30068e+07	3.46198e+07	3.13695e+07	3.47731e+07	2.74664e+07	4.04127e+07	1.98799e+07	2.3326e+07	3.42303e+07	2.32743e+07	4.44557e+07	2.34525e+07	1.00754e+07	7.93829e+06	2.66806e+07	2.78702e+07	2.03301e+07	1.10608e+07	4.01593e+07	1.29204e+08	2.20772e+08		0.642943	-0.471554	0.391547	0.167336	0.326258	0.0412581	0.150092	-0.561811	0.520998	0.297637	-0.640611	0.965969	0.364398	-1.15076	-0.973099	-0.252624	-0.0790428	-0.358451	-0.634258	0.817139	-0.232382	0.565215		0.499688	0.499255	0.499842
P68371	1.89837e+07	1.48813e+07	1.84134e+07	1.66894e+07	1.79338e+07	1.63836e+07	2.84451e+07	1.25751e+07	9.36417e+06	1.60298e+07	1.69723e+07	2.14913e+07	1.36445e+07	6.95752e+06	4.24115e+06	1.61517e+07	1.67736e+07	1.16198e+07	6.97974e+06	2.149e+07	91238.5	193500		0.852825	-0.349632	0.238771	0.053123	0.0168386	0.158651	0.49588	-0.380999	-0.292025	-0.0889408	-0.301418	0.898708	0.714176	-0.343525	-0.777155	-0.284989	-0.168887	-0.115958	-0.238518	0.934782	-0.289793	0.618963		0.499688	0.499255	0.499842
P68402	566.36	17433	21701.8	26610.2	44352.4	7640.7	10127.1	2279.4	18061.7	753.038	0	122.431	0	0	77.1636	11324.1	6811.96	0	0	7.3693	0	0		-2.84118	2.31059	2.66078	2.65878	3.08434	1.29113	1.0667	-0.338081	2.02569	-1.63749	NA	-4.0212	NA	NA	-2.69039	2.40094	0.412668	NA	NA	-8.05285	NA	NA		0.0579403	0.0508621	0.000342722
P78316	4459.46	33322.4	55048.8	40607.9	29315.2	26159.6	38729	35178.7	38143.6	53122.5	49773.8	81954	39723.5	32086.6	11872.7	49789	65369.6	15285.9	21207	14756.8	NA	NA		-2.77641	-0.366214	0.256168	-0.0487623	-1.09952	-0.484882	-0.522955	-0.0834372	-0.209949	0.138985	0.023686	1.43916	1.09672	1.71484	0.0899603	-0.0797163	0.330536	0.414862	0.511933	-0.809971	NA	NA		0.0658468	0.499255	0.499842
P78344	16914.6	40879	12518.5	40448.6	64837.4	17849.6	48463.8	30737.6	15659.6	30222.4	89921.1	7986.55	6343.59	3204.83	3872.14	71075.4	76874.3	9363.35	2319.64	10822.5	11082.6	12373.8		0.0850574	0.808327	-1.11508	0.745879	0.853847	-0.213108	0.624531	0.650164	-0.770294	0.104547	1.76006	-1.2372	-0.777255	-0.838075	-0.550602	1.25181	1.37079	-0.500888	-1.74379	-0.472999	-0.966674	-1.40807		0.499688	0.497436	0.304951
P78347	1.8358e+06	2.97331e+06	2.28767e+06	5.47108e+06	1.81981e+06	3.48235e+06	3.70176e+06	2.13115e+06	1.94016e+06	2.35546e+06	2.17967e+06	1.52497e+06	1.5817e+06	2.48772e+06	958549	1.14959e+06	1.51303e+06	1.27514e+06	864503	1.77413e+06	439346	342903		0.306018	0.177707	0.0574831	1.355	-0.482463	0.794718	0.412819	-0.0871711	0.162645	-0.0221429	-0.387903	-0.0500277	0.48402	1.20944	0.0115289	-1.30419	-0.85564	-0.391511	-0.378232	0.206418	0.0698378	-0.56927		0.499688	0.499255	0.499842
P78371	1.20441e+06	2.5846e+06	2.05166e+06	1.90849e+06	2.56982e+06	1.68984e+06	2.06069e+06	2.03989e+06	2.19711e+06	1.87209e+06	2.168e+06	917697	969133	1.0308e+06	1.2106e+06	3.45394e+06	3.19343e+06	1.54473e+06	1.22463e+06	1.72022e+06	2.26158e+06	4.92272e+06		-0.191151	0.0845056	0.0183493	-0.113296	0.161845	-0.169346	-0.350305	-0.0414101	0.546435	-0.23952	-0.307406	-0.719175	-0.148014	-0.0831052	0.425748	0.460395	0.396664	-0.0441332	0.234165	0.254508	-0.7087	0.214414		0.499688	0.499255	0.499842
P78386	NA	NA	NA	NA	NA	NA	NA	NA	NA	NA	NA	NA	NA	NA	NA	NA	NA	NA	NA	NA	125856	155151		NA	NA	NA	NA	NA	NA	NA	NA	NA	NA	NA	NA	NA	NA	NA	NA	NA	NA	NA	NA	-0.284558	-0.454497		NA	NA	NA
P78406	187581	508291	418703	396143	503912	476135	541301	373616	335674	272725	277633	168150	163440	138486	173172	179554	260527	157510	191928	204671	543663	213522		-0.32478	0.586557	0.431407	0.368647	0.448052	0.778499	0.467368	0.30435	0.250147	-0.404989	-0.443703	-0.469946	0.0377063	0.12009	0.524931	-1.1408	-0.583175	-0.480349	0.413051	-0.0773087	1.18511	-0.5352		0.499688	0.499255	0.499842
P78417	21605.6	56656.2	34377.4	26625.8	43187.9	28225	52511.3	38077.1	26547.8	22559.4	31739	9513.39	9861.97	6068.1	7883.71	30316	36736.3	8360.15	11442.7	8018.74	45388	113476		0.226528	1.02986	0.13583	-0.0767296	0.0700836	0.23205	0.519614	0.640466	-0.166211	-0.551398	-0.0544641	-1.19724	-0.382644	-0.178435	0.115415	-0.232847	0.0504428	-0.917847	0.21637	-1.11151	-1.18375	-0.421068		0.499688	0.43458	0.499842
P78424	NA	NA	NA	NA	NA	NA	NA	NA	NA	NA	NA	NA	NA	NA	NA	NA	NA	NA	NA	NA	0	0		NA	NA	NA	NA	NA	NA	NA	NA	NA	NA	NA	NA	NA	NA	NA	NA	NA	NA	NA	NA	NA	NA		NA	NA	NA
P78509	8365.02	61098.7	48544	28607.7	53919.8	47150.2	52989.2	53303.2	9856.98	25389.9	55628.9	38237.9	21595.3	42973.2	29531.9	60489.8	38838.1	28106.2	0	11665.2	NA	NA		-1.29034	1.08159	0.563207	-0.068252	0.286958	0.920941	0.43998	1.09382	-1.78331	-0.480471	0.708137	0.783784	0.717904	2.71344	2.08092	0.708313	0.0332974	0.818849	NA	0.383073	NA	NA		0.434624	0.432212	0.499842
P78527	1.10838e+06	635435	700029	1.69226e+06	1.27256e+06	938465	1.04919e+06	649875	1.02066e+06	1.22205e+06	936560	733097	1.98183e+06	142480	259490	1.20738e+06	1.57872e+06	820675	299930	1.30931e+06	1.8507e+06	2.20019e+06		0.808	-0.84539	-0.43901	0.879039	0.247928	0.112539	-0.197895	-0.581994	0.451264	0.262572	-0.365633	0.132657	2.089	-1.74263	-0.644137	0.0322625	0.465911	0.238532	-0.676827	1.02117	0.176715	0.152113		0.499688	0.492006	0.499842
P78559	NA	NA	NA	NA	NA	NA	NA	NA	NA	NA	NA	NA	NA	NA	NA	NA	NA	NA	NA	NA	1.78198e+06	972476		NA	NA	NA	NA	NA	NA	NA	NA	NA	NA	NA	NA	NA	NA	NA	NA	NA	NA	NA	NA	1.21302	-0.105858		NA	NA	NA
P80723	301471	789047	689491	637891	599340	364273	478744	391002	519532	726975	564602	349239	177201	108473	144994	353706	398815	264482	130567	124902	429515	203487		-0.0410839	0.770927	0.743753	0.630656	0.288269	-0.0612166	-0.153904	-0.069033	0.518969	0.630553	0.160127	0.203435	-0.278634	-0.73724	-0.200256	-0.578282	-0.388879	-0.167113	-0.613944	-1.25542	0.353729	-1.08679		0.499688	0.499255	0.445386
P81605	16804.7	7873.79	12699.1	15099	673600	21600.3	31249	4550.54	3743.37	9505.25	6072.19	6150.91	5664.55	8689.2	1400.68	11626.5	6764.77	4737.95	1215.83	6105.84	NA	NA		1.01796	-0.58148	0.00141492	0.25633	5.45901	1.14574	1.05573	-1.05606	-1.91887	-0.579494	-1.15916	-0.627784	0.0585304	1.7774	-0.93312	-0.374331	-1.23893	-0.508239	-1.56024	-0.358133	NA	NA		0.499688	0.499255	0.499842
P82673	10118.2	5357.48	2395.9	1701.64	3204.78	0	6626.82	692.102	26443.3	7629.58	8141.7	2703.41	1374.83	0	17435.4	9910.05	3031.3	25051.5	0	4769.29	53183.2	56367.5		0.717624	0.387734	-1.96367	-1.48494	-2.06142	NA	0.277847	-2.30455	2.55938	-0.388499	-0.186093	-0.312379	-0.527624	NA	3.34734	0.944914	-0.890026	2.47676	NA	0.801552	1.41064	0.898813		0.499688	0.499255	0.0356783
P82933	16899.4	137770	158093	121959	122663	85164.6	121268	123537	165221	151504	124432	322009	61804.2	49353.3	56573.4	92675.8	83289.7	51702.8	79526.8	57277.8	NA	NA		-2.43211	0.173908	0.406215	0.0830053	-0.291241	-0.315506	-0.300521	0.15241	0.552665	0.192512	-0.138035	1.95772	0.0877025	0.311728	0.492881	-0.643281	-0.796153	-0.541858	0.691248	-0.444386	NA	NA		0.125118	0.499255	0.499842
P82979	NA	NA	NA	NA	NA	NA	NA	NA	NA	NA	NA	NA	NA	NA	NA	NA	NA	NA	NA	NA	112237	166408		NA	NA	NA	NA	NA	NA	NA	NA	NA	NA	NA	NA	NA	NA	NA	NA	NA	NA	NA	NA	0.00604907	0.0826474		NA	NA	NA
P83111	818.704	2580.84	2707.26	13751.6	7460.05	5519.44	2724.78	1149.95	35528.4	4817.73	4020.59	14526.6	8615.85	1316.29	1755.12	3622.19	3661.81	789.564	163.364	17719.3	NA	NA		-2.63191	-1.0276	-0.96865	1.20806	-0.0836955	0.349686	-1.36657	-1.79912	2.60007	-0.309384	-0.457208	1.77553	1.84054	0.187529	0.613715	-0.834895	-0.964363	-2.0328	-3.29508	2.33268	NA	NA		0.0887338	0.43458	0.372216
P83731	411285	1.12755e+06	877327	1.01426e+06	1.81979e+06	896244	1.33789e+06	1.00587e+06	532828	1.58236e+06	1.14481e+06	588628	334432	534759	323437	1.11631e+06	969011	697580	287278	675820	1.52301e+06	2.69467e+06		-0.613769	0.0587994	-0.051398	0.168829	0.832168	0.0954774	0.215608	0.118923	-0.461984	0.69929	-0.016551	-0.142773	-0.50688	0.273055	-0.267016	-0.0324691	-0.207812	0.0465082	-0.690414	0.0889569	-0.318928	0.249169		0.499688	0.499255	0.499842
P83881	48381.7	154401	80577	211845	196725	43464	64816.2	69242.7	78680	168502	76519.1	47514.4	20632	32557.8	26754	153637	83849.2	78906.9	37686.7	74666.7	283769	227736		-0.450173	0.717561	-0.236564	1.27001	0.773125	-0.936968	-0.856528	-0.331271	-0.192826	0.723765	-0.485092	-0.544053	-1.16416	0.101289	-0.231746	0.492577	-0.398104	0.488043	-0.0400937	0.345342	0.0266616	-0.724003		0.499688	0.499255	0.499842
P84085	139365	177895	169807	121520	175733	118922	157101	94303.7	67988.9	117193	96110.7	41251.9	37460.3	24539.3	20720.3	103536	114315	44915.4	32456.5	53493.3	30818.2	142743		0.98448	0.781632	0.709211	0.283169	0.429893	0.412613	0.305745	-0.0124645	-0.573272	0.0320779	-0.296982	-0.907463	-0.416564	-0.411573	-0.726482	-0.246588	-0.0880743	-0.475963	-0.390196	-0.281093	-2.35431	-0.521191		0.499688	0.499255	0.464298
P84098	321594	559660	470853	509077	450606	370894	375169	290386	355757	708368	323954	212070	202882	223207	205582	311357	252069	206920	222111	190930	328643	952325		0.221614	0.413691	0.338759	0.454941	0.0291604	0.125269	-0.35588	-0.352475	0.128898	0.757385	-0.509082	-0.371292	0.0832153	0.485431	0.475401	-0.608779	-0.910725	-0.374254	0.333221	-0.463612	-0.769158	0.485776		0.499688	0.499255	0.499842
P84103	1.53135e+06	2.95127e+06	2.20609e+06	2.16029e+06	2.42354e+06	1.83534e+06	2.78089e+06	2.18365e+06	1.36296e+06	2.94097e+06	3.28341e+06	1.29542e+06	838526	1.20183e+06	807793	2.3484e+06	2.10911e+06	1.4504e+06	1.14787e+06	1.29901e+06	3.93981e+06	3.95727e+06		0.123236	0.240114	0.0841994	0.0272587	0.0333339	-0.0893012	0.0520393	0.0174649	-0.200638	0.390361	0.266554	-0.251483	-0.407959	0.0969784	-0.220886	-0.155319	-0.26143	-0.183352	0.0939915	-0.208532	0.0149649	-0.21025		0.499688	0.499255	0.499842
P84157	NA	NA	NA	NA	NA	NA	NA	NA	NA	NA	NA	NA	NA	NA	NA	NA	NA	NA	NA	NA	0	7042.06		NA	NA	NA	NA	NA	NA	NA	NA	NA	NA	NA	NA	NA	NA	NA	NA	NA	NA	NA	NA	NA	-0.149541		NA	NA	NA
P85037	NA	NA	NA	NA	NA	NA	NA	NA	NA	NA	NA	NA	NA	NA	NA	NA	NA	NA	NA	NA	32769.9	44215.5		NA	NA	NA	NA	NA	NA	NA	NA	NA	NA	NA	NA	NA	NA	NA	NA	NA	NA	NA	NA	-0.0952615	-0.256823		NA	NA	NA
P98153	34.6347	805.053	0	11270.6	0	1030.76	78175.7	78.2585	203.033	717.254	0	5069.58	1208.56	101.082	18.4749	397.701	2347.25	949.917	187.695	9787.64	NA	NA		-6.07771	-0.603216	NA	2.84944	NA	-0.0136831	6.05405	-2.54873	-3.24547	-0.898157	NA	1.94506	1.95178	-1.4513	-3.30576	-0.84372	0.530246	1.48698	-0.895343	3.25366	NA	NA		6.11e-07	0.499255	NA
P98175	4.57474e+06	6.24616e+06	4.62915e+06	4.10082e+06	4.33715e+06	5.5672e+06	5.78867e+06	5.58108e+06	5.22374e+06	5.81207e+06	6.85416e+06	7.18111e+06	5.48866e+06	6.17561e+06	5.45649e+06	4.50466e+06	4.53803e+06	5.37395e+06	5.10694e+06	4.83586e+06	6.78678e+06	5.84992e+06		0.100377	-0.220034	-0.404106	-0.643821	-0.667166	-0.0499471	-0.484851	-0.180987	0.321825	-0.185911	-0.253787	0.623928	0.704647	0.777493	0.956178	-0.769519	-0.689485	0.0956269	0.663693	0.0656968	0.195824	-0.184355		0.499688	0.499255	0.499842
P98179	173448	497734	358369	172639	491440	207185	256641	247066	266342	311280	273906	150587	65052.9	97957	156627	392693	394834	195547	191935	116304	438818	698440		-0.219274	0.741998	0.417452	-0.663437	0.637409	-0.250681	-0.432408	-0.10156	0.160666	0.0132418	-0.263643	-0.405628	-1.12083	-0.227864	0.568531	0.228011	0.245253	0.0362484	0.611958	-0.711958	-0.740285	-0.378383		0.499688	0.499255	0.499842
Q00059	NA	NA	NA	NA	NA	NA	NA	NA	NA	NA	NA	NA	NA	NA	NA	NA	NA	NA	NA	NA	126237	86902.4		NA	NA	NA	NA	NA	NA	NA	NA	NA	NA	NA	NA	NA	NA	NA	NA	NA	NA	NA	NA	1.29485	0.0575495		NA	NA	NA
Q00325	5.99246e+06	1.04744e+06	1.69842e+06	3.0615e+06	1.68161e+06	1.26737e+06	2.18133e+06	992299	2.71891e+06	2.50947e+06	857610	2.36077e+06	3.89365e+06	489287	470214	2.47941e+06	1.91885e+06	1.29319e+06	988560	2.98345e+06	3.41606e+06	6.59376e+06		2.28301	-1.17363	-0.176696	0.677958	-0.383999	-0.51044	-0.177817	-1.02707	0.942882	0.282491	-1.59928	0.776309	2.01007	-1.09809	-0.891969	0.0528253	-0.276567	-0.218357	0.0037512	1.16329	-0.0499598	0.691708		0.271953	0.404496	0.499842
Q00341	38879.6	53745.8	42265.1	30026.7	70837.7	43971.5	41973.2	45583.7	54581	40337.9	57117.7	73641.3	10993	10937.7	20024.7	36405.1	64944.7	14886.6	27252.9	26856.1	195510	98265.9		0.33217	0.200705	-0.255643	-0.631787	0.132444	0.150164	-0.512728	0.145095	0.219929	-0.395973	0.0926992	1.1354	-0.990187	-0.126169	0.642815	-0.665611	0.204159	-0.824855	0.674107	-0.0436186	0.84895	-0.729841		0.499688	0.499255	0.499842
[truncated: 1,174 more rows]
[truncated: 20 more columns]

## Sheet: Table S3 (Contaminants)
	TABLE S3
[truncated: 27 more rows]

## Sheet: Table S4 (SINQ data)
		TABLE S4
		Unique E3 HCIPs identifed by SINQ
		FLAG-HA-tagged E3 baits
[truncated: 2,256 more rows]
[truncated: 15 more columns]

## Sheet: Table S5 (HCIPs)
	TABLE S5
[truncated: 84 more rows]
[truncated: 12 more columns]

[truncated: 7 more sheets: Table S6 (Nanostring), Table S7 (UPR-related HCIPs), Table S8 (RNF26 HCIPs), Table S9 (E3 cDNA sources), Table S10 (HCIP cDNA sources), Table S11 (siRNAs), Table S12 (Stats)]
